# Supplementary material for: Regioselective installation of enolizable ketones and unprotected mercaptoacetic acid into olefins using GO as a phase transfer catalyst
Source: Royal Society of Chemistry journal article supplement (doi:10.1039/d1nj05870c), 2022-01-01

ELECTRONIC SUPPLEMENTARY INFORMATION

For

**Regioselective installation of enolizable ketones and unprotected mercaptoacetic acid into olefins using GO as phase transfer catalyst**

Prashant Shukla,<sup>a</sup> Manorama Singh,<sup>b</sup> Vijai K. Rai<sup>b</sup> and Ankita Rai<sup>\*a</sup>

<sup>†</sup>School of Physical Sciences, Jawaharlal Nehru University, New Delhi, 110067, INDIA

<sup>§</sup>Department of Chemistry, Guru Ghasidas Vishwavidyalaya, Bilaspur (C.G.)-495009, INDIA

TABLE OF CONTENTS

|             |                                                                          |         |
|-------------|--------------------------------------------------------------------------|---------|
| <b>I</b>    | EDAX of Graphene Oxide                                                   | S2      |
| <b>II.</b>  | General methods                                                          | S2      |
|             | <b>A.</b> General Information                                            | S2      |
|             | <b>B.</b> General procedure for the synthesis of Michael adduct <b>3</b> | S3      |
|             | <b>C.</b> General method for the synthesis of Michael adduct <b>5</b>    | S3      |
| <b>III.</b> | Spectroscopic and analytical data for compounds <b>3</b>                 | S3-S13  |
| <b>IV.</b>  | Spectroscopic and analytical data for compounds <b>5</b>                 | S13-S18 |
| <b>V.</b>   | <sup>1</sup> H and <sup>13</sup> C NMR Spectra of compounds <b>3</b>     | S19-S64 |
| <b>VI.</b>  | <sup>1</sup> H and <sup>13</sup> C NMR Spectra of compounds <b>5</b>     | S65-S98 |

## I EDAX of Graphene Oxide:

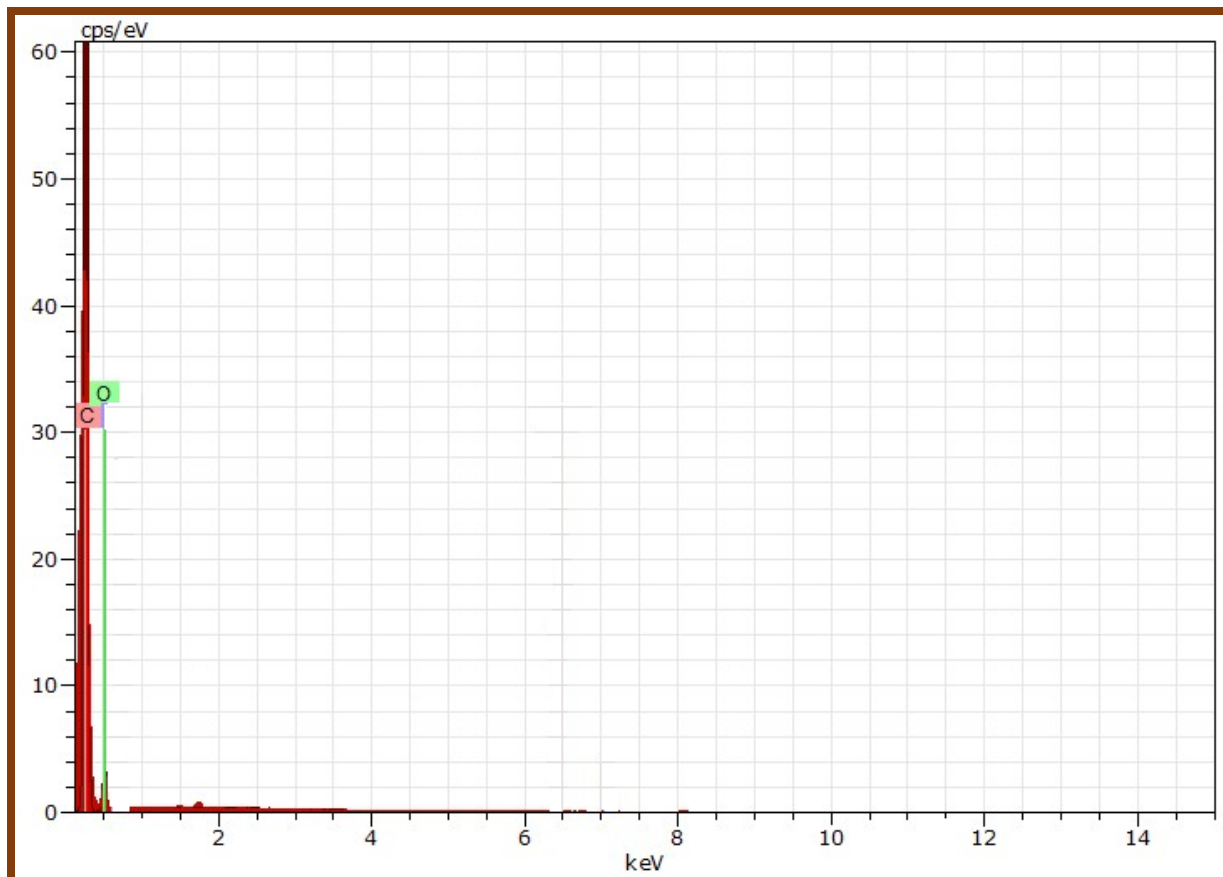

## II. General Methods

- A. General Information:** Reagents were obtained from commercial suppliers, and used without further purification unless otherwise specified by a reference. All reactions were performed using oven-dried glassware under a nitrogen atmosphere. Organic solutions were concentrated using a Buchi rotary evaporator. Column chromatography was carried out over silica gel (Merck 60-120 mesh) and TLC was performed using silica gel GF254 (Merck) plates. IR spectra in KBr were recorded on a Shimadzu 400-4000  $\text{cm}^{-1}$  FTIR spectrophotometer,  $^1\text{H}$  NMR spectra were recorded on a Bruker AVIII 500 spectrometer in  $\text{CDCl}_3$ ,  $\text{D}_2\text{O}$ , DMSO with chemical shift value being reported in ppm. All coupling constants ( $J$ ) are reported in Hertz (Hz).  $^{13}\text{C}$  NMR spectra were recorded on the same

instrument at 125 MHz in CDCl<sub>3</sub>. Elemental analyses were carried out in a Coleman automatic carbon, hydrogen and nitrogen analyzer.

- B. General procedure for the synthesis of Michael adduct 3:** To a mixture of GO (10mg), KOH (0.185g, 3.3 mmol, 2.2 equiv.), Michael acceptor (1.5 mmol, 1 equiv), Michael donor (2.25 mmol, 1.5 equiv.) added 4 mL mixture of DCM:H<sub>2</sub>O (1:1) solvent. The reaction mixture was stirred at room temperature for 25h. After completion of reaction (as monitored by TLC; 30%EtOAc/*n*-hexane), the reaction mixture was undergoing simple filtration and washing of residue (GO) by diethyl ether (5 mL×3). The catalyst was then washed with water and ethanol, dried under vacuum and was reused for further experiment. Then, the reaction mixture was washed sequentially with DCM (10 mL×3) and water (10 mL×2). The combined organic extracts were dried over sodium sulfate and concentrated to give the crude product. Then the crude product was purified by column chromatography over silica gel to afford the analytically pure sample 3. The structure of all the synthesized compounds 3 were confirmed by their elemental and spectral analyses.
- C. General method for the synthesis of Michael adduct 5:** To a mixture of GO (10mg), KOH (0.092 g, 1.65 mmol, 1.1 equiv.), Michael acceptor (1.5 mmol, 1 equiv), Michael donor (2.25 mmol, 1.5 equiv.) added 4 mL mixture of DCM:H<sub>2</sub>O (1:1) solvent. The reaction mixture was stirred at room temperature. After completion of reaction (as monitored by TLC; 50% EtOAc/*n*-hexane), the reaction mixture was filtered and residue (GO) was washed by diethyl ether (5 mL×3). The catalyst was then washed with water and ethanol, dried under vacuum and was reused for further experiment. Then, the reaction mixture was used as such as crude product. This crude product was purified by column chromatography over silica gel to afford the analytically pure sample 5. The structure of all the synthesized compounds 5 were confirmed by their elemental and spectral analyses.

### **III. Spectroscopic and analytical data for compounds 3.**

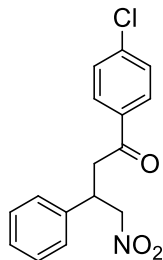

**Compound 3a: 1-(4-chlorophenyl)-4-nitro-3-phenylbutan-1-one.** Eluent in chromatography: *n*-hexane/EtOAc 24:1. Yellow crystal, Yield 79%, M.P. 82-83°C. IR (KBr): (ν) 3054, 1707, 1599, 1566, 1458, 1372, 1341, 722. <sup>1</sup>H NMR (500 MHz; CDCl<sub>3</sub>) δ: 7.76 (d, 2H, *J* = 8 Hz), 7.55 (d, 2H, *J* = 7.5 Hz), 7.37 (d, 2H, *J* = 7 Hz), 7.32 (t, 2H, *J* = 7 Hz), 7.25 (d, 1H, *J* = 7 Hz), 5.29 (d, 2H, *J* = 8 Hz), 3.35 (s, 1H), 3.31-3.23 (m, 2H). <sup>13</sup>C{<sup>1</sup>H}NMR (125 MHz; CDCl<sub>3</sub>) δ: 196.8, 143.0, 135.6, 132.2, 129.8, 129.1, 128.8, 128.0, 125.9, 79.6, 41.7, 39.4. EIMS (*m/z*): 303 (M<sup>+</sup>) Anal. Calcd. for C<sub>16</sub>H<sub>14</sub>ClNO<sub>3</sub>: C, 63.27; H, 4.65; N, 4.61. Found: C, 62.97; H, 4.38; N, 4.96.

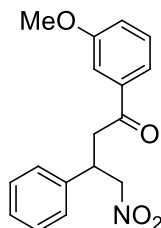

**Compound 3b: 1-(3-methoxyphenyl)-4-nitro-3-phenylbutan-1-one.** Eluent in chromatography: *n*-hexane/EtOAc 24:1. Reddish yellow oil, Yield 70%. IR (KBr): (ν) 3063, 1708, 1603, 1563, 1457, 1451, 1379, 1338, 1249. <sup>1</sup>H NMR (500 MHz; CDCl<sub>3</sub>) δ: 7.56-7.54 (m, 1H), 7.46 (d, 1H, *J* = 7.5 Hz), 7.42 (s, 1H), 7.39-7.29 (m, 5H), 7.07 (d, 1H, *J* = 7.5 Hz), 5.29 (br s, 2H), 4.32-4.20 (m, 1H), 3.80 (s, 3H), 3.31-3.23 (m, 2H). <sup>13</sup>C{<sup>1</sup>H}NMR (125 MHz; CDCl<sub>3</sub>) δ: 196.7, 159.9, 139.2, 137.8, 129.8, 129.2, 127.9, 127.7, 120.6, 120.0, 112.3, 79.6, 55.5, 41.7, 39.5. EIMS (*m/z*): 299 (M<sup>+</sup>) Anal. Calcd for C<sub>17</sub>H<sub>17</sub>NO<sub>4</sub>: C, 68.21; H, 5.72; N, 4.68. Found: C, 68.44; H, 5.43; N, 4.59.

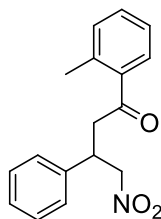

**Compound 3c: 4-nitro-3-phenyl-1-(*o*-tolyl)butan-1-one.** Eluent in chromatography: *n*-hexane/EtOAc 24:1. Dark yellow oil, Yield 71%. IR (KBr): (ν) 3063, 2940, 1706, 1604, 1568, 1459, 1452, 1376, 1342. <sup>1</sup>H NMR (500 MHz; CDCl<sub>3</sub>) δ: 7.49 (d, 1H, *J* = 8 Hz), 7.30-7.29 (m, 1H), 7.28-7.25 (m, 2H), 7.19-7.15 (m, 5H), 4.49 (dd, 2H, *J* = 12.5 Hz, 7.5 Hz), 3.82-3.78 (m, 1H), 3.40 (dd, 2H, 13 Hz, 6.5 Hz), 2.11 (s, 3H). <sup>13</sup>C{<sup>1</sup>H}NMR (125 MHz; CDCl<sub>3</sub>) δ: 200.7, 138.9, 138.5, 137.2, 132.1, 131.7, 129.2, 128.3, 127.9, 127.5, 125.8, 79.7, 44.3, 39.6, 21.1. EIMS (m/z): 283 (M<sup>+</sup>) Anal. Calcd for C<sub>17</sub>H<sub>17</sub>NO<sub>3</sub>: C, 72.07; H, 6.05; N, 4.94. Found: C, 72.39; H, 6.24; N, 5.16.

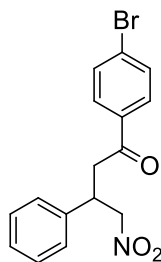

**Compound 3d: 1-(4-bromophenyl)-4-nitro-3-phenylbutan-1-one.** Eluent in chromatography: *n*-hexane/EtOAc 24:1. Reddish brown oil, Yield 78%. IR (KBr): (ν) 3061, 1708, 1603, 1563, 1458, 1448, 1378, 1340, 680. <sup>1</sup>H NMR (500 MHz; CDCl<sub>3</sub>) δ: 7.84 (d, 2H, *J* = 7 Hz), 7.39-7.25 (m, 7H), 4.82-4.64 (m, 2H), 3.94-3.87 (m, 1H), 3.36-3.27 (m, 2H). <sup>13</sup>C{<sup>1</sup>H}NMR (125 MHz; CDCl<sub>3</sub>) δ: 196.4, 139.1, 135.3, 129.8, 129.2, 128.8, 128.3, 128.0, 125.9, 79.2, 41.4, 39.3. EIMS (m/z): 347 (M<sup>+</sup>) Anal. Calcd for C<sub>16</sub>H<sub>14</sub>BrNO<sub>3</sub>: C, 55.19; H, 4.05; N, 4.02. Found: C, 55.39; H, 4.36; N, 3.87.

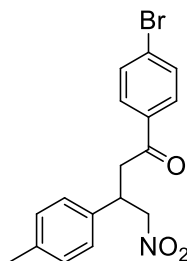

**Compound 3e: 1-(4-bromophenyl)-4-nitro-3-(*p*-tolyl)butan-1-one.** Eluent in chromatography: *n*-hexane/EtOAc 24:1. Reddish brown oil, Yield 81%. IR (KBr): (ν) 3061, 2944, 1705, 1605, 1566, 1456, 1450, 1379, 1339, 677. <sup>1</sup>H NMR (500 MHz; CDCl<sub>3</sub>) δ: 7.73-7.64 (m, 2H), 7.52-7.44 (m, 2H), 7.18-7.12 (m, 4H), 4.79 (dd, 1H, *J* = 12.5 Hz, 6.5 Hz), 4.68 (dd, 1H, *J* = 12.5 Hz, 8.5 Hz), 4.24-4.18 (m, 1H), 3.46-3.40 (m, 2H), 2.13 (s,

3H).  $^{13}\text{C}\{^1\text{H}\}$ NMR (125 MHz;  $\text{CDCl}_3$ )  $\delta$ : 197.5, 137.6, 136.09, 136.06, 131.4, 129.8, 129.7, 128.3, 127.9, 79.5, 41.7, 38.7, 21.1. EIMS (m/z): 361 ( $\text{M}^+$ ) Anal. Calcd for  $\text{C}_{17}\text{H}_{16}\text{BrNO}_3$ : C, 56.37; H, 4.45; N, 3.87. Found: C, 56.10; H, 4.55; N, 3.68.

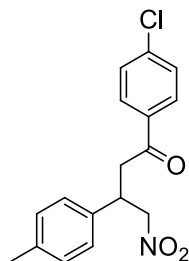

**Compound 3f:** 1-(4-chlorophenyl)-4-nitro-3-(*p*-tolyl)butan-1-one. Eluent in chromatography: *n*-hexane/EtOAc 24:1. Dark yellow oil, Yield 82%. IR (KBr): (v) 3058, 2938, 1706, 1601, 1562, 1454, 1447, 1374, 1343, 724.  $^1\text{H}$  NMR (500 MHz;  $\text{CDCl}_3$ )  $\delta$ : 7.77 (d, 2H,  $J = 8$  Hz), 7.56 (d, 2H,  $J = 8$  Hz), 7.18-7.11 (m, 4H), 4.78 (dd, 1H,  $J = 12.5$  Hz, 6.5 Hz), 4.67 (dd, 1H,  $J = 12.5$  Hz, 8.5 Hz), 4.22-4.17 (m, 1H), 3.48-3.40 (m, 2H), 2.12 (s, 3H).  $^{13}\text{C}\{^1\text{H}\}$ NMR (125 MHz;  $\text{CDCl}_3$ )  $\delta$ : 196.8, 139.0, 137.6, 136.2, 135.3, 129.7, 129.6, 128.7, 128.3, 79.7, 41.6, 38.9, 21.1. EIMS (m/z): 317 ( $\text{M}^+$ ) Anal. Calcd for  $\text{C}_{17}\text{H}_{16}\text{ClNO}_3$ : C, 64.26; H, 5.08; N, 4.41. Found: C, 64.46; H, 4.77; N, 4.76.

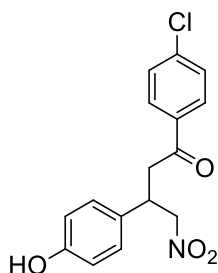

**Compound 3g:** 1-(4-chlorophenyl)-3-(4-hydroxyphenyl)-4-nitrobutan-1-one. Eluent in chromatography: *n*-hexane / EtOAc 47:3. Light yellow oil, Yield 92%. IR (KBr): (v) 3360, 3061, 2785, 1707, 1596, 1562, 1472, 1459, 1378, 1342, 726.  $^1\text{H}$  NMR (500 MHz;  $\text{CDCl}_3$ )  $\delta$ : 7.78 (d, 2H,  $J = 8$  Hz), 7.40 (d, 2H,  $J = 8$  Hz), 7.25 (d, 2H,  $J = 7.5$  Hz), 6.87 (d, 2H, 7.5 Hz), 4.86-4.80 (m, 1H), 4.63-4.58 (m, 1H), 4.18-4.12 (m, 1H), 3.36-3.32 (m, 2H).  $^{13}\text{C}\{^1\text{H}\}$ NMR (125 MHz;  $\text{CDCl}_3$ )  $\delta$ : 196.7, 155.8, 138.9, 135.1, 131.7, 130.1, 128.9, 127.8, 115.9, 79.8, 41.7, 39.3. EIMS (m/z): 319 ( $\text{M}^+$ ) Anal. Calcd for  $\text{C}_{16}\text{H}_{14}\text{ClNO}_4$ : C, 60.10; H, 4.41; N, 4.38. Found: C, 59.75; H, 4.71; N, 4.13.

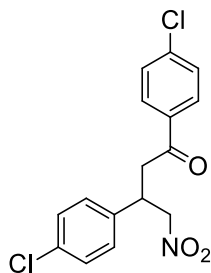

**Compound 3h: 1,3-bis(4-chlorophenyl)-4-nitrobutan-1-one.** Eluent in chromatography: *n*-hexane / EtOAc 19:1. Yellow oil, Yield 65%. IR (KBr): ( $\nu$ ) 3058, 1709, 1602, 1568, 1460, 1455, 1374, 1344, 729, 722.  $^1\text{H}$  NMR (500 MHz;  $\text{CDCl}_3$ )  $\delta$ : 7.78 (d, 2H,  $J = 8$  Hz), 7.39 (d, 2H,  $J = 8$  Hz), 7.26 (d, 2H,  $J = 5$  Hz), 7.16 (d, 2H,  $J = 5$  Hz), 4.75-4.70 (m, 1H), 4.61-4.57 (m, 1H), 4.16-4.12 (m, 1H), 3.36-3.32 (m, 2H).  $^{13}\text{C}\{^1\text{H}\}$  NMR (125 MHz;  $\text{CDCl}_3$ )  $\delta$ : 195.5, 140.1, 137.6, 134.7, 134.0, 129.6, 129.5, 129.3, 129.1, 79.5, 41.5, 38.7. EIMS ( $m/z$ ): 337 ( $\text{M}^+$ ) Anal. Calcd for  $\text{C}_{16}\text{H}_{13}\text{Cl}_2\text{NO}_3$ : C, 56.82; H, 3.87; N, 4.14. Found: C, 57.14; H, 3.58; N, 4.36.

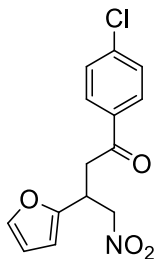

**Compound 3i: 1-(4-chlorophenyl)-3-(furan-2-yl)-4-nitrobutan-1-one.** Eluent in chromatography: *n*-hexane / EtOAc 24:1. Yellow oil, Yield 77%. IR (KBr): ( $\nu$ ) 3053, 1706, 1603, 1462, 1458, 1336, 1078, 728.  $^1\text{H}$  NMR (500 MHz;  $\text{CDCl}_3$ )  $\delta$ : 7.76 (d, 2H,  $J = 8$  Hz), 7.56 (d, 2H,  $J = 8$  Hz), 7.33-7.32 (m, 1H), 6.32-6.28 (m, 1H), 6.21-6.16 (m, 1H), 4.82-4.72 (m, 2H), 4.39-4.32 (m, 1H), 3.51-3.43 (m, 2H).  $^{13}\text{C}\{^1\text{H}\}$  NMR (125 MHz;  $\text{CDCl}_3$ )  $\delta$ : 196.4, 151.4, 142.2, 139.4, 135.2, 129.2, 128.3, 110.3, 107.2, 77.7, 38.7, 33.3. EIMS ( $m/z$ ): 293 ( $\text{M}^+$ ) Anal. Calcd for  $\text{C}_{14}\text{H}_{12}\text{ClNO}_4$ : C, 57.25; H, 4.12; N, 4.77. Found: C, 57.04; H, 3.96; N, 5.12.

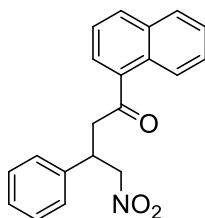

**Compound 3j: 1-(naphthalen-1-yl)-4-nitro-3-phenylbutan-1-one.** Eluent in chromatography: *n*-hexane / EtOAc 19:1. Yellow oil, Yield 73%. IR (KBr): (ν) 3066, 3061, 1707, 1605, 1603, 1600, 1562, 1457, 1450, 1372, 1333. <sup>1</sup>H NMR (500 MHz; CDCl<sub>3</sub>) δ: 8.58 (d, 1H, *J* = 9 Hz), 7.91-7.74 (m, 4H), 7.57-7.48 (m, 2H), 7.43-7.32 (m, 5H), 4.63-4.57 (m, 2H), 4.11-4.06 (m, 1H), 3.57 (dd, 2H, *J* = 15 Hz, 6 Hz). <sup>13</sup>C{<sup>1</sup>H}NMR (125 MHz; CDCl<sub>3</sub>) δ: 196.5, 139.1, 135.5, 133.8, 133.1, 130.4, 129.1, 128.7, 128.4, 128.1, 128.0, 127.7, 126.4, 126.0, 124.4, 79.6, 41.4, 39.3. EIMS (*m/z*): 319 (*M*<sup>+</sup>) Anal. Calcd for C<sub>20</sub>H<sub>17</sub>NO<sub>3</sub>: C, 75.22; H, 5.37; N, 4.39. Found: C, 75.57; H, 5.63; N, 4.09.

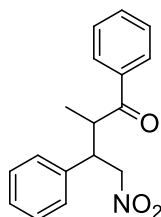

**Compound 3k: 2-methyl-4-nitro-1,3-diphenylbutan-1-one.** Eluent in chromatography: *n*-hexane / EtOAc 24:1. Yellow crystal, Yield 66%, M.P. 105-106°C. IR (KBr): (ν) 3068, 2938, 1706, 1604, 1602, 1568, 1456, 1377, 1344, 1340. <sup>1</sup>H NMR (500 MHz; CDCl<sub>3</sub>) δ: 7.92 (d, 2H, *J* = 8 Hz), 7.51 (t, 1H, *J* = 7 Hz), 7.41 (t, 2H, *J* = 7.5 Hz), 7.36 (d, 2H, *J* = 7.5 Hz), 7.30 (t, 2H, *J* = 7.5 Hz), 7.23 (t, 1H, *J* = 7 Hz), 4.94 (d, 2H, *J* = 8 Hz), 3.81-3.75 (m, 1H), 2.96 (br s, 1H), 1.01 (d, 3H, *J* = 7 Hz). <sup>13</sup>C{<sup>1</sup>H}NMR (125 MHz; CDCl<sub>3</sub>) δ: 205.1, 142.4, 137.0, 133.5, 128.8, 128.7, 128.6, 128.1, 126.9, 78.4, 48.2, 43.3, 15.9. EIMS (*m/z*): 283 (*M*<sup>+</sup>) Anal. Calcd for C<sub>17</sub>H<sub>17</sub>NO<sub>3</sub>: C, 72.07; H, 6.05; N, 4.94. Found: C, 72.37; H, 5.70; N, 4.73.

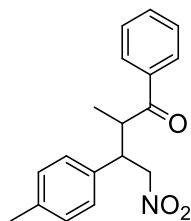

**Compound 3l: 2-methyl-4-nitro-1-phenyl-3-(*p*-tolyl)butan-1-one.** Eluent in chromatography: *n*-hexane / EtOAc 24:1. Yellow oil, Yield 67%. IR (KBr): (ν) 3061, 2944, 2940, 1707, 1604, 1569, 1462, 1379, 1343, 1338. <sup>1</sup>H NMR (500 MHz; CDCl<sub>3</sub>) δ: 7.93 (d, 2H, *J* = 7 Hz), 7.54-7.50 (m, 3 H), 7.24 (t, 2H, *J* = 8 Hz), 7.11 (t, 2H, *J* = 7.5 Hz),



5.17 (dd, 1H,  $J = 19$  Hz, 3 Hz), 4.92 (dd, 1H,  $J = 18.5$  Hz, 8.5 Hz), 3.79-3.73 (m, 1H), 3.66-3.61 (m, 1H), 2.29 (s, 3H), 0.99 (d, 3H,  $J = 7$  Hz).  $^{13}\text{C}\{^1\text{H}\}$ NMR (125 MHz;  $\text{CDCl}_3$ )  $\delta$ : 201.8, 137.8, 137.1, 133.6, 133.4, 129.3, 128.8, 128.6, 126.9, 77.6, 48.2, 43.8, 21.3, 15.8. EIMS ( $m/z$ ): 297 ( $\text{M}^+$ ) Anal. Calcd for  $\text{C}_{18}\text{H}_{19}\text{NO}_3$ : C, 72.71; H, 6.44; N, 4.71. Found: C, 72.42; H, 6.75; N, 4.86.

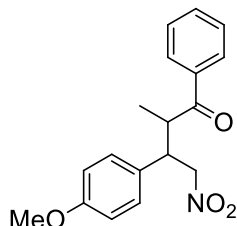

**Compound 3m: 3-(4-methoxyphenyl)-2-methyl-4-nitro-1-phenylbutan-1-one.** Eluent in chromatography: *n*-hexane / EtOAc 19:1. Yellow oil, Yield 68%. IR (KBr): ( $\nu$ ) 3070, 2942, 1706, 1600, 1570, 1464, 1374, 1339, 1334, 1252.  $^1\text{H}$  NMR (500 MHz;  $\text{CDCl}_3$ )  $\delta$ : 7.88 (d, 2H,  $J = 9$  Hz), 7.45-7.42 (m, 5H), 6.86 (d, 2H,  $J = 9$  Hz), 4.90 (d, 2H,  $J = 8$  Hz), 3.84-3.81 (m, 1H), 3.77 (s, 3H), 2.82-2.78 (m, 1H). 0.98 (d, 3H,  $J = 7$  Hz).  $^{13}\text{C}\{^1\text{H}\}$ NMR (125 MHz;  $\text{CDCl}_3$ )  $\delta$ : 201.5, 159.1, 142.3, 133.4, 131.1, 128.7, 128.4, 128.3, 114.9, 77.7, 55.5, 45.4, 43.2, 15.8. EIMS ( $m/z$ ): 313 ( $\text{M}^+$ ) Anal. Calcd for  $\text{C}_{18}\text{H}_{19}\text{NO}_4$ : C, 68.99; H, 6.11; N, 4.47. Found: C, 68.85; H, 5.82; N, 4.82.

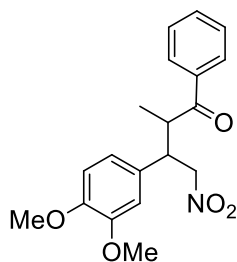

**Compound 3n: 3-(3,4-dimethoxyphenyl)-2-methyl-4-nitro-1-phenylbutan-1-one.** Eluent in chromatography: *n*-hexane / EtOAc 19:1. Yellow oil, Yield 69%. IR (KBr): ( $\nu$ ) 3088, 3082, 2949, 1707, 1603, 1561, 1473, 1374, 1343, 1338, 1261, 1257.  $^1\text{H}$  NMR (500 MHz;  $\text{CDCl}_3$ )  $\delta$ : 7.73 (s, 2H), 7.53-7.52 (m, 3H), 7.45 (s, 1H), 6.83 (d, 1H,  $J = 3.5$  Hz), 6.52-6.51 (m, 1H), 4.66 (d, 2H,  $J = 8$  Hz), 3.92 (s, 3H), 3.89 (s, 3H), 3.85-3.83 (m, 1H), 3.60-3.55 (m, 1H), 0.93 (d, 3H,  $J = 7$  Hz).  $^{13}\text{C}\{^1\text{H}\}$ NMR (125 MHz;  $\text{CDCl}_3$ )  $\delta$ : 201.1, 149.5, 148.7, 139.2, 133.7, 131.4, 128.8, 128.2, 119.1, 111.6, 110.6, 77.8, 55.9, 55.8, 45.1, 43.2, 15.7. EIMS ( $m/z$ ): 343 ( $\text{M}^+$ ) Anal. Calcd for  $\text{C}_{19}\text{H}_{21}\text{NO}_5$ : C, 66.46; H, 6.16; N, 4.08. Found: C, 66.68; H, 5.82; N, 3.92.

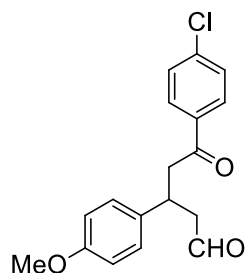

**Compound 3o: 5-(4-chlorophenyl)-3-(4-methoxyphenyl)-5-oxopentanal.** Eluent in chromatography: *n*-hexane / EtOAc 19:1. Yellow oil, Yield 85%. IR (KBr): (ν) 3082, 1724, 1707, 1601, 1466, 1451, 1336, 1264, 729. <sup>1</sup>H NMR (500 MHz; CDCl<sub>3</sub>) δ: 9.59 (d, 1H, *J* = 2 Hz), 7.86 (d, 2H, *J* = 8 Hz), 7.40 (d, 2H, *J* = 8 Hz), 7.27 (d, 2H, *J* = 8.5 Hz), 6.81 (d, 2H, *J* = 8.5 Hz), 3.87-3.78 (m, 1H), 3.76 (s, 3H), 3.20 (d, 2H, *J* = 7 Hz), 2.73-2.67 (m, 2H). <sup>13</sup>C{<sup>1</sup>H}NMR (125 MHz; CDCl<sub>3</sub>) δ: 201.5, 196.6, 158.3, 139.6, 135.8, 131.1, 129.4, 128.9, 128.7, 114.6, 55.5, 49.7, 44.5, 35.4. EIMS (m/z): 316 (M<sup>+</sup>) Anal. Calcd for C<sub>18</sub>H<sub>17</sub>ClO<sub>3</sub>: C, 68.25; H, 5.41. Found: C, 68.01; H, 5.33.

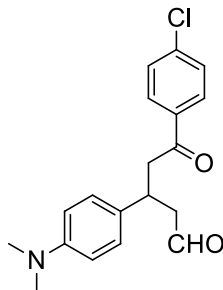

**Compound 3p: 5-(4-chlorophenyl)-3-(4-(dimethylamino)phenyl)-5-oxopentanal.** Eluent in chromatography: *n*-hexane / EtOAc 97:3. Yellow oil, Yield 88%. IR (KBr): (ν) 3069, 2883, 2880, 1725, 1707, 1603, 1601, 1463, 1460, 1340, 736. <sup>1</sup>H NMR (500 MHz; CDCl<sub>3</sub>) δ: 9.55 (d, 1H, *J* = 2 Hz), 7.87 (d, 2H, *J* = 7.5 Hz), 7.40 (d, 2H, *J* = 7.5 Hz), 7.36 (d, 2H, *J* = 8.5 Hz), 6.64 (d, 2H, *J* = 8.5), 3.87-3.83 (m, 1H), 3.05 (br s, 2H), 2.98 (s, 6H), 2.84-2.75 (m, 2H). <sup>13</sup>C{<sup>1</sup>H}NMR (125 MHz; CDCl<sub>3</sub>) δ: 201.1, 197.7, 150.3, 139.5, 135.7, 130.1, 129.8, 128.9, 128.4, 113.4, 49.4, 44.7, 41.0, 35.8. EIMS (m/z): 329 (M<sup>+</sup>) Anal. Calcd for C<sub>19</sub>H<sub>20</sub>ClNO<sub>2</sub>: C, 69.19; H, 6.11; N, 4.25. Found: C, 68.91; H, 5.78; N, 4.48.

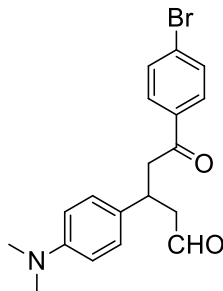

**Compound 3q: 5-(4-bromophenyl)-3-(4-(dimethylamino)phenyl)-5-oxopentanal.**

Eluent in chromatography: *n*-hexane / EtOAc 19:1. Brownish oil, Yield 87%. IR (KBr): (v) 3063, 2892, 2889, 1724, 1706, 1605, 1602, 1466, 1459, 1335, 687. <sup>1</sup>H NMR (500 MHz; CDCl<sub>3</sub>) δ: 9.53 (d, 1H, *J* = 2 Hz), 7.72-7.66 (m, 2H), 7.50-7.44 (m, 2H), 7.34 (d, 2H, *J* = 8 Hz), 6.62 (d, 2H, *J* = 8.5 Hz), 3.85 (br s, 1H), 3.02 (br s, 2H), 2.96 (s, 6H), 2.82-2.74 (m, 2H). <sup>13</sup>C{<sup>1</sup>H}NMR (125 MHz; CDCl<sub>3</sub>) δ: 200.8, 197.1, 150.0, 135.6, 131.7, 129.9, 129.7, 128.7, 128.3, 113.8, 49.6, 44.8, 41.0, 35.2. EIMS (*m/z*): 373 (M<sup>+</sup>) Anal. Calcd for C<sub>19</sub>H<sub>20</sub>BrNO<sub>2</sub>: C, 60.97; H, 5.39; N, 3.74. Found: C, 61.17; H, 5.74; N, 3.60.

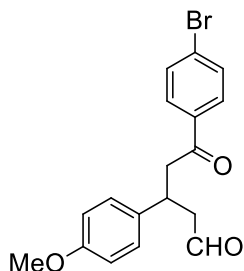

**Compound 3r: 5-(4-bromophenyl)-3-(4-methoxyphenyl)-5-oxopentanal.** Eluent in chromatography: *n*-hexane / EtOAc 19:1. Brownish oil, Yield 83%. IR (KBr): (v) 3072, 1722, 1706, 1598, 1466, 1463, 1342, 1258, 686. <sup>1</sup>H NMR (500 MHz; CDCl<sub>3</sub>) δ: 9.58 (d, 1H, *J* = 2 Hz), 7.75-7.69 (m, 2H), 7.52-7.47 (m, 2H), 7.26 (d, 2H, *J* = 8.5 Hz), 6.79 (d, 2H, *J* = 8.5), 3.83-3.77 (m, 1H), 3.74 (s, 3H), 3.18 (d, 2H, *J* = 7 Hz), 2.72-2.65 (m, 2H). <sup>13</sup>C{<sup>1</sup>H}NMR (125 MHz; CDCl<sub>3</sub>) δ: 201.3, 196.4, 158.4, 135.9, 131.8, 131.3, 129.3, 128.3, 127.8, 114.0, 55.5, 49.2, 44.2, 35.2. EIMS (*m/z*): 360 (M<sup>+</sup>) Anal. Calcd for C<sub>18</sub>H<sub>17</sub>BrO<sub>3</sub>: C, 59.85; H, 4.74. Found: C, 60.18; H, 4.53.

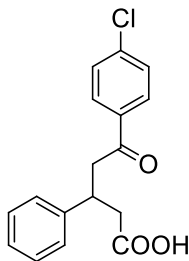

**Compound 3s: 5-(4-chlorophenyl)-5-oxo-3-phenylpentanoic acid.** Eluent in chromatography: *n*-hexane / EtOAc 1:24. White powder, M.P. 136-138°C, Yield 76%. IR (KBr): (ν) 3052, 1706, 1702, 1597, 1453, 1450, 1336, 719. <sup>1</sup>H NMR (500 MHz; CDCl<sub>3</sub>) δ: 7.85 (d, 2H, *J* = 8.5 Hz), 7.38 (d, 2H, *J* = 8.5 Hz), 7.30-7.23 (m, 4H), 7.19-7.14 (m, 1H), 3.84-3.78 (m, 1H), 3.38-3.30 (m, 2H), 2.84 (q, 1H, *J* = 7 Hz), 2.74 (q, 1H, *J* = 7.5 Hz). <sup>13</sup>C{<sup>1</sup>H}NMR (125 MHz; CDCl<sub>3</sub>) δ: 196.9, 176.9, 142.8, 139.6, 135.1, 129.5, 128.9, 128.7, 127.4, 127.0, 44.5, 40.4, 37.2. EIMS (m/z): 302 (M<sup>+</sup>) Anal. Calcd for C<sub>17</sub>H<sub>15</sub>ClO<sub>3</sub>: C, 67.44; H, 4.99. Found: C, 67.14; H, 4.77.

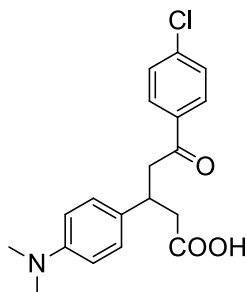

**Compound 3t: 5-(4-chlorophenyl)-3-(4-(dimethylamino)phenyl)-5-oxopentanoic acid.** Eluent in chromatography: *n*-hexane / EtOAc 1:24. Yellow oil, Yield 90%. IR (KBr): (ν) 3066, 2894, 2884, 1713, 1706, 1604, 1461, 1453, 1341, 732. <sup>1</sup>H NMR (500 MHz; CDCl<sub>3</sub>) δ: 7.89 (d, 2H, *J* = 8.5 Hz), 7.49 (d, 2H, *J* = 8.5 Hz), 7.41 (d, 2H, *J* = 8.5 Hz), 6.64 (d, 2H, *J* = 8.5 Hz), 3.42-3.36 (m, 1H), 3.07-3.01 (m, 2H), 2.99 (s, 6H), 2.15-2.09 (m, 2H). <sup>13</sup>C{<sup>1</sup>H}NMR (125 MHz; CDCl<sub>3</sub>) δ: 196.8, 177.1, 149.1, 139.8, 135.5, 129.7, 129.1, 128.9, 127.0, 113.2, 44.6, 41.2, 40.1, 37.7. EIMS (m/z): 345 (M<sup>+</sup>) Anal. Calcd for C<sub>19</sub>H<sub>20</sub>ClNO<sub>3</sub>: C, 65.99; H, 5.83; N, 4.05. Found: C, 65.76; H, 5.48; N, 4.20.

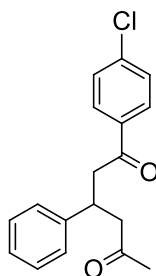

**Compound 3u: 1-(4-chlorophenyl)-3-phenylhexane-1,5-dione.** Eluent in chromatography: *n*-hexane / EtOAc 24:1. Yellow oil, Yield 74%. IR (KBr): (ν) 3054, 1709, 1707, 1603, 1458, 1450, 1337, 734. <sup>1</sup>H NMR (500 MHz; CDCl<sub>3</sub>) δ: 7.79 (d, 2H, *J* = 8.5 Hz), 7.38-7.31 (m, 7H), 3.82-3.75 (m, 1H), 3.27 (dd, 1H, *J* = 16.5 Hz, 7 Hz), 3.17 (dd, 1H, *J* = 16.5 Hz, 7 Hz), 2.86 (dd, 1H, *J* = 17 Hz, 7 Hz), 2.78 (dd, 1H, *J* = 17 Hz, 7 Hz),

2.03 (s, 3H).  $^{13}\text{C}\{^1\text{H}\}$ NMR (125 MHz;  $\text{CDCl}_3$ )  $\delta$ : 207.1, 200.3, 144.2, 143.2, 134.4, 129.2, 128.7, 128.6, 127.9, 125.9, 49.2, 44.7, 36.7, 30.5. EIMS (m/z): 300 ( $\text{M}^+$ ) Anal. Calcd for  $\text{C}_{18}\text{H}_{17}\text{ClO}_2$ : C, 71.88; H, 5.70. Found: C, 72.25; H, 5.93.

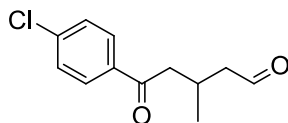

**Compound 3v: 5-(4-chlorophenyl)-3-methyl-5-oxopentanal.** Eluent in chromatography: *n*-hexane / EtOAc 49:1. Yellow oil, Yield 64%. IR (KBr): ( $\nu$ ) 3066, 2948, 1723, 1707, 1601, 1598, 1462, 1447, 1342, 731.  $^1\text{H}$  NMR (500 MHz;  $\text{CDCl}_3$ )  $\delta$ : 9.43 (d, 1H,  $J = 2$  Hz), 7.88 (d, 2H,  $J = 8.5$  Hz), 7.38 (d, 2H,  $J = 8.5$  Hz), 3.25-3.18 (m, 1H), 3.11-3.04 (m, 2H), 2.80-2.71 (m, 2H), 1.01 (d, 3H,  $J = 6.5$  Hz).  $^{13}\text{C}\{^1\text{H}\}$ NMR (125 MHz;  $\text{CDCl}_3$ )  $\delta$ : 202.3, 199.3, 139.0, 134.8, 129.8, 128.6, 50.7, 44.9, 24.7, 20.6. EIMS (m/z): 224 ( $\text{M}^+$ ) Anal. Calcd for  $\text{C}_{12}\text{H}_{13}\text{ClO}_2$ : C, 64.15; H, 5.83. Found: 63.83; H, 5.56.

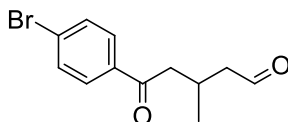

**Compound 3w: 5-(4-bromophenyl)-3-methyl-5-oxopentanal.** Eluent in chromatography: *n*-hexane / EtOAc 49:1. Brown oil, Yield 61%. IR (KBr): ( $\nu$ ) 3068, 2944, 1720, 1707, 1602, 1452, 1448, 1337, 692.  $^1\text{H}$  NMR (500 MHz;  $\text{CDCl}_3$ )  $\delta$ : 9.41 (d, 1H,  $J = 2$  Hz), 7.87 (d, 2H,  $J = 8$  Hz), 7.54 (d, 2H,  $J = 8$  Hz), 3.10 (br s, 1H), 3.06 (br s, 2H), 2.80 (br s, 2H), 0.94 (d, 3H,  $J = 6.5$  Hz).  $^{13}\text{C}\{^1\text{H}\}$ NMR (125 MHz;  $\text{CDCl}_3$ )  $\delta$ : 200.7, 198.0, 136.1, 131.5, 129.8, 128.5, 50.4, 44.8, 24.4, 21.4. EIMS (m/z): 268 ( $\text{M}^+$ ) Anal. Calcd for  $\text{C}_{12}\text{H}_{13}\text{BrO}_2$ : C, 53.55; H, 4.87. Found: C, 53.36; H, 4.99.

#### IV. Spectroscopic and analytical data for compounds 5.

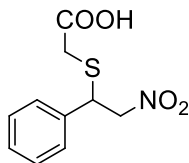

**Compound 5a: 2-((2-nitro-1-phenylethyl)thio)acetic acid.** Eluent in chromatography: *n*-hexane / EtOAc 3:97. Yellow solid, M.P. 71-72°C, Yield 86%. IR (KBr): ( $\nu$ ) 1702, 1508, 1379, 1318, 1220, 709.  $^1\text{H}$  NMR (500 MHz;  $\text{CDCl}_3$ )  $\delta$ : 9.51 (br s, 1H), 7.29-7.23 (m, 5H),

4.82-4.73 (m, 3H), 3.13-3.00 (m, 2H).  $^{13}\text{C}\{^1\text{H}\}$ NMR (125 MHz;  $\text{CDCl}_3$ )  $\delta$ : 175.5, 135.9, 129.2, 128.9, 127.9, 78.4, 46.5, 32.5. EIMS ( $m/z$ ): 241 ( $\text{M}^+$ ) Anal. Calcd for  $\text{C}_{10}\text{H}_{11}\text{NO}_4\text{S}$ : C, 49.78; H, 4.60; N, 5.81. Found: 49.47; H, 4.26; N, 5.93.

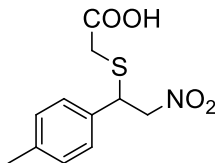

**Compound 5b: 2-((2-nitro-1-(*p*-tolyl)ethyl)thio)acetic acid.** Eluent in chromatography: *n*-hexane / EtOAc 3:97. Yellow semisolid, Yield 83%. IR (KBr): ( $\nu$ ) 2942, 1700, 1504, 1378, 1310, 1218, 712.  $^1\text{H}$  NMR (500 MHz;  $\text{CDCl}_3$ )  $\delta$ : 10.51 (br s, 1H), 7.23 (d, 2H,  $J = 8.5$  Hz), 7.16 (d, 2H,  $J = 8$  Hz), 4.84-4.77 (m, 3H), 3.18-3.05 (m, 2H), 2.32 (s, 3H).  $^{13}\text{C}\{^1\text{H}\}$ NMR (125 MHz;  $\text{CDCl}_3$ )  $\delta$ : 176.2, 138.8, 132.7, 129.9, 127.8, 78.5, 46.3, 32.4, 21.2. EIMS ( $m/z$ ): 255 ( $\text{M}^+$ ) Anal. Calcd for  $\text{C}_{11}\text{H}_{13}\text{NO}_4\text{S}$ : C, 51.75; H, 5.13; N, 5.49. Found: C, 51.91; H, 5.33; N, 5.14.

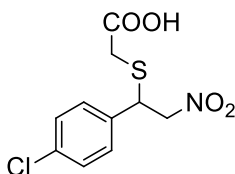

**Compound 5c: 2-((1-(4-chlorophenyl)-2-nitroethyl)thio)acetic acid.** Eluent in chromatography: *n*-hexane / EtOAc 3:97. Yellow viscous solid, Yield 75%. IR (KBr): ( $\nu$ ) 1704, 1502, 1382, 1312, 1216, 724, 708.  $^1\text{H}$  NMR (500 MHz;  $\text{D}_2\text{O}$ )  $\delta$ : 8.07 (s, 1H), 7.28-7.20 (m, 4H), 4.60 (br s, 3H), 3.31 (d, 2H,  $J = 3\text{H}$ ).  $^{13}\text{C}\{^1\text{H}\}$ NMR (125 MHz;  $\text{D}_2\text{O}$ )  $\delta$ : 175.3, 138.8, 133.6, 129.3, 128.4, 78.8, 46.5, 32.5. EIMS ( $m/z$ ): 275 ( $\text{M}^+$ ) Anal. Calcd for  $\text{C}_{10}\text{H}_9\text{ClNO}_4\text{S}$ : C, 43.56; H, 3.66; N, 5.08. Found: C, 43.80; H, 3.35; N, 5.19.

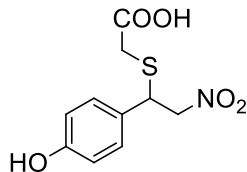

**Compound 5d: 2-((1-(4-hydroxyphenyl)-2-nitroethyl)thio)acetic acid.** Eluent in chromatography: *n*-hexane / EtOAc 3:97. Yellow semisolid, Yield 90%. IR (KBr): ( $\nu$ ) 3362, 2872, 1703, 1507, 1373, 1310, 1214, 704.  $^1\text{H}$  NMR (500 MHz;  $\text{D}_2\text{O}$ )  $\delta$ : 10.18 (br s, 1H), 7.07 (d, 2H,  $J = 8.5$  Hz), 6.71 (d, 2H,  $J = 8.5$  Hz), 5.00 (s, 1H), 4.76 (br s, 3H), 3.15-3.11 (m, 2H).  $^{13}\text{C}\{^1\text{H}\}$ NMR (125 MHz;  $\text{D}_2\text{O}$ )  $\delta$ : 174.9, 155.7, 129.3, 127.9, 115.7, 77.7,

48.8, 33.7. EIMS (m/z): 257 (M<sup>+</sup>) Anal. Calcd for C<sub>10</sub>H<sub>11</sub>NO<sub>5</sub>S: C, 46.69; H, 4.31; N, 5.44. Found: C, 46.34; H, 4.65; N, 5.25.

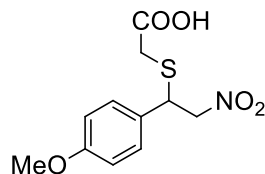

**Compound 5e: 2-((1-(4-methoxyphenyl)-2-nitroethyl)thio)acetic acid.** Eluent in chromatography: *n*-hexane / EtOAc 3:97. Yellow semisolid, Yield 89%. IR (KBr): (ν) 1718, 1510, 1370, 1315, 1247, 1216, 718. <sup>1</sup>H NMR (500 MHz; DMSO) δ: 9.59 (s, 1H), 7.25 (d, 2H, *J* = 8 Hz), 6.72 (d, 2H, *J* = 8 Hz), 4.94 (br s, 3H), 3.81 (s, 3H), 3.14 (d, 2H, *J* = 2 Hz). <sup>13</sup>C{<sup>1</sup>H}NMR (125 MHz; DMSO) δ: 175.5, 159.1, 131.0, 129.5, 114.2, 78.2, 55.4, 46.3, 32.4. EIMS (m/z): 271 (M<sup>+</sup>) Anal. Calcd for C<sub>11</sub>H<sub>13</sub>NO<sub>5</sub>S: C, 48.70; H, 4.83; N, 5.16. Found: C, 48.54; H, 4.54; N, 5.50.

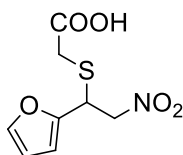

**Compound 5f: 2-((1-(furan-2-yl)-2-nitroethyl)thio)acetic acid.** Eluent in chromatography: *n*-hexane / EtOAc 3:47. Yellow semisolid, Yield 84%. IR (KBr): (ν) 1714, 1568, 1473, 1448, 1373, 1343. <sup>1</sup>H NMR (500 MHz; CDCl<sub>3</sub>) δ: 7.53 (br s, 1H), 7.31-7.30 (m, 1H), 6.27 (d, 1H, *J* = 3.5 Hz), 6.24-6.23 (m, 1H), 4.86-4.75 (m, 3H), 3.15 (s, 2H). <sup>13</sup>C{<sup>1</sup>H}NMR (125 MHz; CDCl<sub>3</sub>) δ: 174.7, 148.1, 143.4, 110.7, 109.5, 76.1, 39.6, 32.3. EIMS (m/z): 231 (M<sup>+</sup>) Anal. Calcd for C<sub>8</sub>H<sub>9</sub>NO<sub>5</sub>S: C, 41.55; H, 3.92; N, 6.06. Found: 41.88; H, 3.67; N, 6.24.

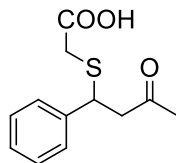

**Compound 5g: 2-((3-oxo-1-phenylbutyl)thio)acetic acid.** Eluent in chromatography: *n*-hexane / EtOAc 2:23. Light yellow semisolid, Yield 79%. IR (KBr): (ν) 3068, 1721, 1714, 1597, 1478, 1462, 1338. <sup>1</sup>H NMR (500 MHz; CDCl<sub>3</sub>) δ: 7.51-7.25 (m, 5H), 4.39 (br s, 1H), 3.54 (br s, 2H), 2.92 (br s, 2H), 1.96 (s, 3H). <sup>13</sup>C{<sup>1</sup>H}NMR (125 MHz; CDCl<sub>3</sub>) δ: 206.9, 177.0, 143.6, 129.1, 128.4, 127.2, 49.6, 43.9, 35.6, 30.6. EIMS (m/z): 238 (M<sup>+</sup>) Anal. Calcd for C<sub>12</sub>H<sub>14</sub>O<sub>3</sub>S: C, 60.48; H, 5.92. Found: C, 60.26; H, 5.63.

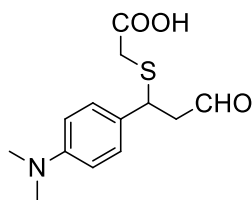

**Compound 5h: 2-((1-(4-(dimethylamino)phenyl)-3-oxopropyl)thio)acetic acid.** Eluent in chromatography: *n*-hexane / EtOAc 1:98. Yellowish semisolid, Yield 85%. IR (KBr): (v) 2967, 2898, 2793, 1732, 1712, 1603, 1567, 1467, 1458, 1343. <sup>1</sup>H NMR (500 MHz; DMSO) δ: 9.58 (s, 1H), 7.08 (d, 2H, *J* = 8.5 Hz), 6.74 (d, 2H, *J* = 8.5 Hz), 3.96-3.92 (m, 1H), 3.53 (s, 6H), 3.14 (s, 2H), 2.82 (br s, 2H). <sup>13</sup>C{<sup>1</sup>H}NMR (125 MHz; DMSO) δ: 201.4, 175.0, 150.1, 129.5, 128.3, 113.6, 52.4, 46.5, 41.2, 31.2. EIMS (*m/z*): 267 (*M*<sup>+</sup>) Anal. Calcd for C<sub>13</sub>H<sub>17</sub>NO<sub>3</sub>S: C, 58.40; H, 6.41; N, 5.24. Found: C, 58.13; H, 6.26; N, 5.48.

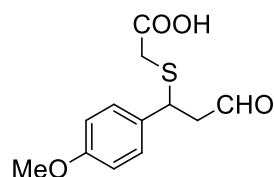

**Compound 5i: 2-((1-(4-methoxyphenyl)-3-oxopropyl)thio)acetic acid.** Eluent in chromatography: *n*-hexane / EtOAc 1:98. Yellowish semisolid, Yield 84%. IR (KBr): (v) 3062, 1728, 1720, 1604, 1454, 1448, 1343, 1248. <sup>1</sup>H NMR (500 MHz; DMSO) δ: 9.60 (d, 1H, *J* = 2 Hz), 7.25 (d, 2H, *J* = 8 Hz), 6.73 (d, 2H, *J* = 8 Hz), 3.81 (s, 3H), 3.75-3.70 (m, 1H), 3.49 (s, 2H), 2.75-2.68 (m, 2H). <sup>13</sup>C{<sup>1</sup>H}NMR (125 MHz; DMSO) δ: 202.4, 174.3, 159.0, 130.3, 129.5, 114.3, 55.4, 52.2, 46.3, 31.0. EIMS (*m/z*): 254 (*M*<sup>+</sup>) Anal. Calcd for C<sub>12</sub>H<sub>14</sub>O<sub>4</sub>S: C, 56.68; H, 5.55. Found: C, 56.96; H, 5.32.

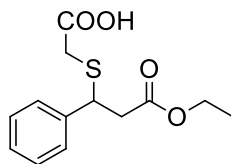

**Compound 5j: 2-((3-ethoxy-3-oxo-1-phenylpropyl)thio)acetic acid.** Eluent in chromatography: *n*-hexane / EtOAc 1:19. Yellow oil, Yield 74%. IR (KBr): (v) 3063, 1742, 1723, 1605, 1468, 1455, 1343. <sup>1</sup>H NMR (500 MHz; DMSO) δ: 9.67 (br s, 1H), 7.39-7.26 (m, 5H), 4.64 (br s, 1H), 4.13 (q, 2H, *J* = 7 Hz), 3.18 (s, 2H), 2.65-2.62 (m, 2H), 1.20 (t, 3H, *J* = 7 Hz). <sup>13</sup>C{<sup>1</sup>H}NMR (125 MHz; DMSO) δ: 174.5, 170.8, 143.4, 128.2, 127.7,



126.3, 60.2, 42.4, 42.0, 35.7, 14.1. EIMS (m/z): 268 (M<sup>+</sup>) Anal. Calcd for C<sub>13</sub>H<sub>16</sub>O<sub>4</sub>S: C, 58.19; H, 6.01. Found: C, 58.30; H, 5.70.

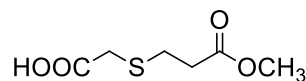

**Compound 5k: 2-((3-methoxy-3-oxopropyl)thio)acetic acid.** Eluent in chromatography: *n*-hexane / EtOAc 1:19. Yellow oil, Yield 67%. IR (KBr): (v) 1748, 1722, 1469, 1454. <sup>1</sup>H NMR (500 MHz; DMSO) δ: 3.58 (s, 3H), 3.14 (s, 2H), 2.73 (s, 2H), 2.60 (s, 2H). <sup>13</sup>C{<sup>1</sup>H}NMR (125 MHz; DMSO) δ: 173.3, 171.4, 51.7, 43.6, 34.3, 28.0. EIMS (m/z): 178 (M<sup>+</sup>) Anal. Calcd for C<sub>6</sub>H<sub>10</sub>O<sub>4</sub>S: C, 40.44; H, 5.66. Found: C, 40.63; H, 5.98.

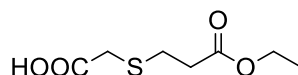

**Compound 5l: 2-((3-ethoxy-3-oxopropyl)thio)acetic acid.** Eluent in chromatography: *n*-hexane / EtOAc 1:19. Yellow oil, Yield 62%. IR (KBr): (v) 1742, 1722, 1458, 1454, 1187. <sup>1</sup>H NMR (500 MHz; DMSO) δ: 4.03, (br s, 2H), 3.13 (br s, 2H), 2.72 (br s, 2H), 2.56 (br s, 2H), 1.15 (br s, 3H). <sup>13</sup>C{<sup>1</sup>H}NMR (125 MHz; DMSO) δ: 173.0, 172.0, 60.4, 43.8, 34.3, 27.0, 14.3. EIMS (m/z): 192 (M<sup>+</sup>) Anal. Calcd for C<sub>7</sub>H<sub>12</sub>O<sub>4</sub>S: C, 43.74; H, 6.29. Found: C, 43.61; H, 6.55.

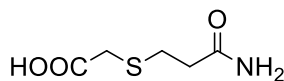

**Compound 5m: 2-((3-amino-3-oxopropyl)thio)acetic acid.** . Eluent in chromatography: *n*-hexane / EtOAc 3:97. Yellow liquid, Yield 51%. IR (KBr): (v) 1714, 1692, 1597, 1472, 1458. <sup>1</sup>H NMR (500 MHz; DMSO) δ: 7.59 (s, 1H), 6.91 (s, 1H), 3.07 (br s, 2H), 2.66 (br s, 2H), 2.33 (br s, 2H). <sup>13</sup>C{<sup>1</sup>H}NMR (125 MHz; DMSO) δ: 174.2, 167.5, 44.7, 35.5, 27.9. EIMS (m/z): 163 (M<sup>+</sup>) Anal. Calcd for C<sub>5</sub>H<sub>9</sub>NO<sub>3</sub>S: C, 36.80; H, 5.56; N, 8.58. Found: C, 36.57; H, 5.89; N, 8.23.

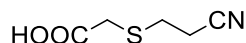

**Compound 5n: 2-((2-cyanoethyl)thio)acetic acid.** Eluent in chromatography: *n*-hexane / EtOAc 1:24. White solid, M.P. 74-76°C, Yield 72%. IR (KBr): (v) 3082, 2263, 1734, 1477, 1464. . <sup>1</sup>H NMR (500 MHz; DMSO) δ: 9.43 (s, 1H), 3.21 (s, 2H), 2.85-2.78 (m, 4H). <sup>13</sup>C{<sup>1</sup>H}NMR (125 MHz; DMSO) δ: 171.5, 119.8, 42.8, 27.2, 17.7. EIMS (m/z): 145 (M<sup>+</sup>) Anal. Calcd for C<sub>5</sub>H<sub>7</sub>NO<sub>2</sub>S: C, 41.36; H, 4.86; N, 9.65. Found: 41.60; H, 5.11; N, 9.48.

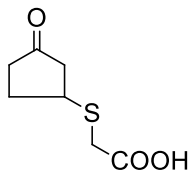

**Compound 5o: 2-((3-oxocyclopentyl)thio)acetic acid.** Eluent in chromatography: *n*-hexane / EtOAc 1:24, Light yellow oil, Yield 59%. IR (KBr): (v) 1746, 1719, 1453, 1448, 1343. <sup>1</sup>H NMR (500 MHz; DMSO) δ: 10.60 (s, 1H), 3.48 (br s, 2H), 3.22 (s, 1H), 2.68-2.57 (m, 1H), 2.26-1.84 (m, 5H). <sup>13</sup>C{<sup>1</sup>H}NMR (125 MHz; DMSO) δ: 216.9, 172.6, 45.2, 40.4, 36.7, 34.5, 29.1. EIMS (m/z): 174 (M<sup>+</sup>) Anal. Calcd for C<sub>7</sub>H<sub>10</sub>O<sub>3</sub>S: C, 48.26; H, 5.79. Found: C, 48.57; H, 5.53.

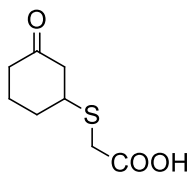

**Compound 5p: 2-((3-oxocyclohexyl)thio)acetic acid.** Eluent in chromatography: *n*-hexane / EtOAc 1:24, Light yellow oil, Yield 56%. IR (KBr): (v) 1720, 1715, 1467, 1448. <sup>1</sup>H NMR (500 MHz; DMSO) δ: 3.51 (br s, 3H), 3.28 (s, 2H), 2.07-1.22 (m, 6H). <sup>13</sup>C{<sup>1</sup>H}NMR (125 MHz; DMSO) δ: 208.5, 171.3, 47.4, 42.7, 37.3, 32.3, 25.0, 22.2. EIMS (m/z): 188 (M<sup>+</sup>) Anal. Calcd for C<sub>8</sub>H<sub>12</sub>O<sub>3</sub>S: C, 51.04; H, 6.43. Found: C, 50.70; H, 6.60.

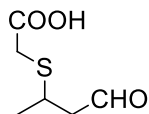

**Compound 5q: 2-((4-oxobutan-2-yl)thio)acetic acid.** Eluent in chromatography: *n*-hexane / EtOAc 1:49, Yellow oil, Yield 55%. IR (KBr): (v) 2879, 1732, 1714, 1476, 1443, 1342. <sup>1</sup>H NMR (500 MHz; DMSO) δ: 11.10 (br s, 1H), 9.58 (s, 1H), 3.34-3.28 (m, 1H), 3.14 (s, 2H), 2.58 (d, 2H, *J* = 7 Hz), 1.21 (d, 3H, *J* = 7 Hz). <sup>13</sup>C{<sup>1</sup>H}NMR (125 MHz; DMSO) δ: 201.1, 174.3, 50.3, 41.5, 32.3, 22.2. EIMS (m/z): 162 (M<sup>+</sup>) Anal. Calcd for C<sub>6</sub>H<sub>10</sub>O<sub>3</sub>S: C, 44.43; H, 6.21. Found: C, 44.73; H, 6.55.

# V. <sup>1</sup>H NMR Spectra 3a -3w

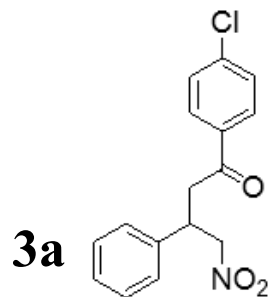

**<sup>1</sup>H NMR 500 MHz, CDCl<sub>3</sub>**

7.765  
7.749  
7.559  
7.544  
7.380  
7.366  
7.336  
7.322  
7.308  
7.261  
7.247  
7.200

5.293  
5.277

3.354  
3.312  
3.296  
3.278  
3.271  
3.264  
3.229

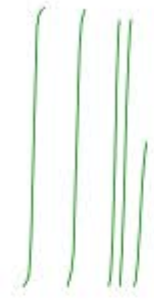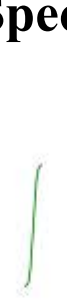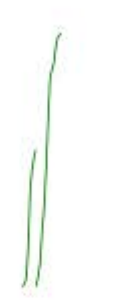

2.13  
2.12  
2.03  
2.04  
1.10

2.09

1.05  
2.00

9.0 8.5 8.0 7.5 7.0 6.5 6.0 5.5 5.0 4.5 4.0 3.5 3.0 2.5 2.0 1.5 1.0 0.5 0.0

f1 (ppm) S19

26000  
24000  
22000  
20000  
18000  
16000  
14000  
12000  
10000  
8000  
6000  
4000  
2000  
0  
-2000

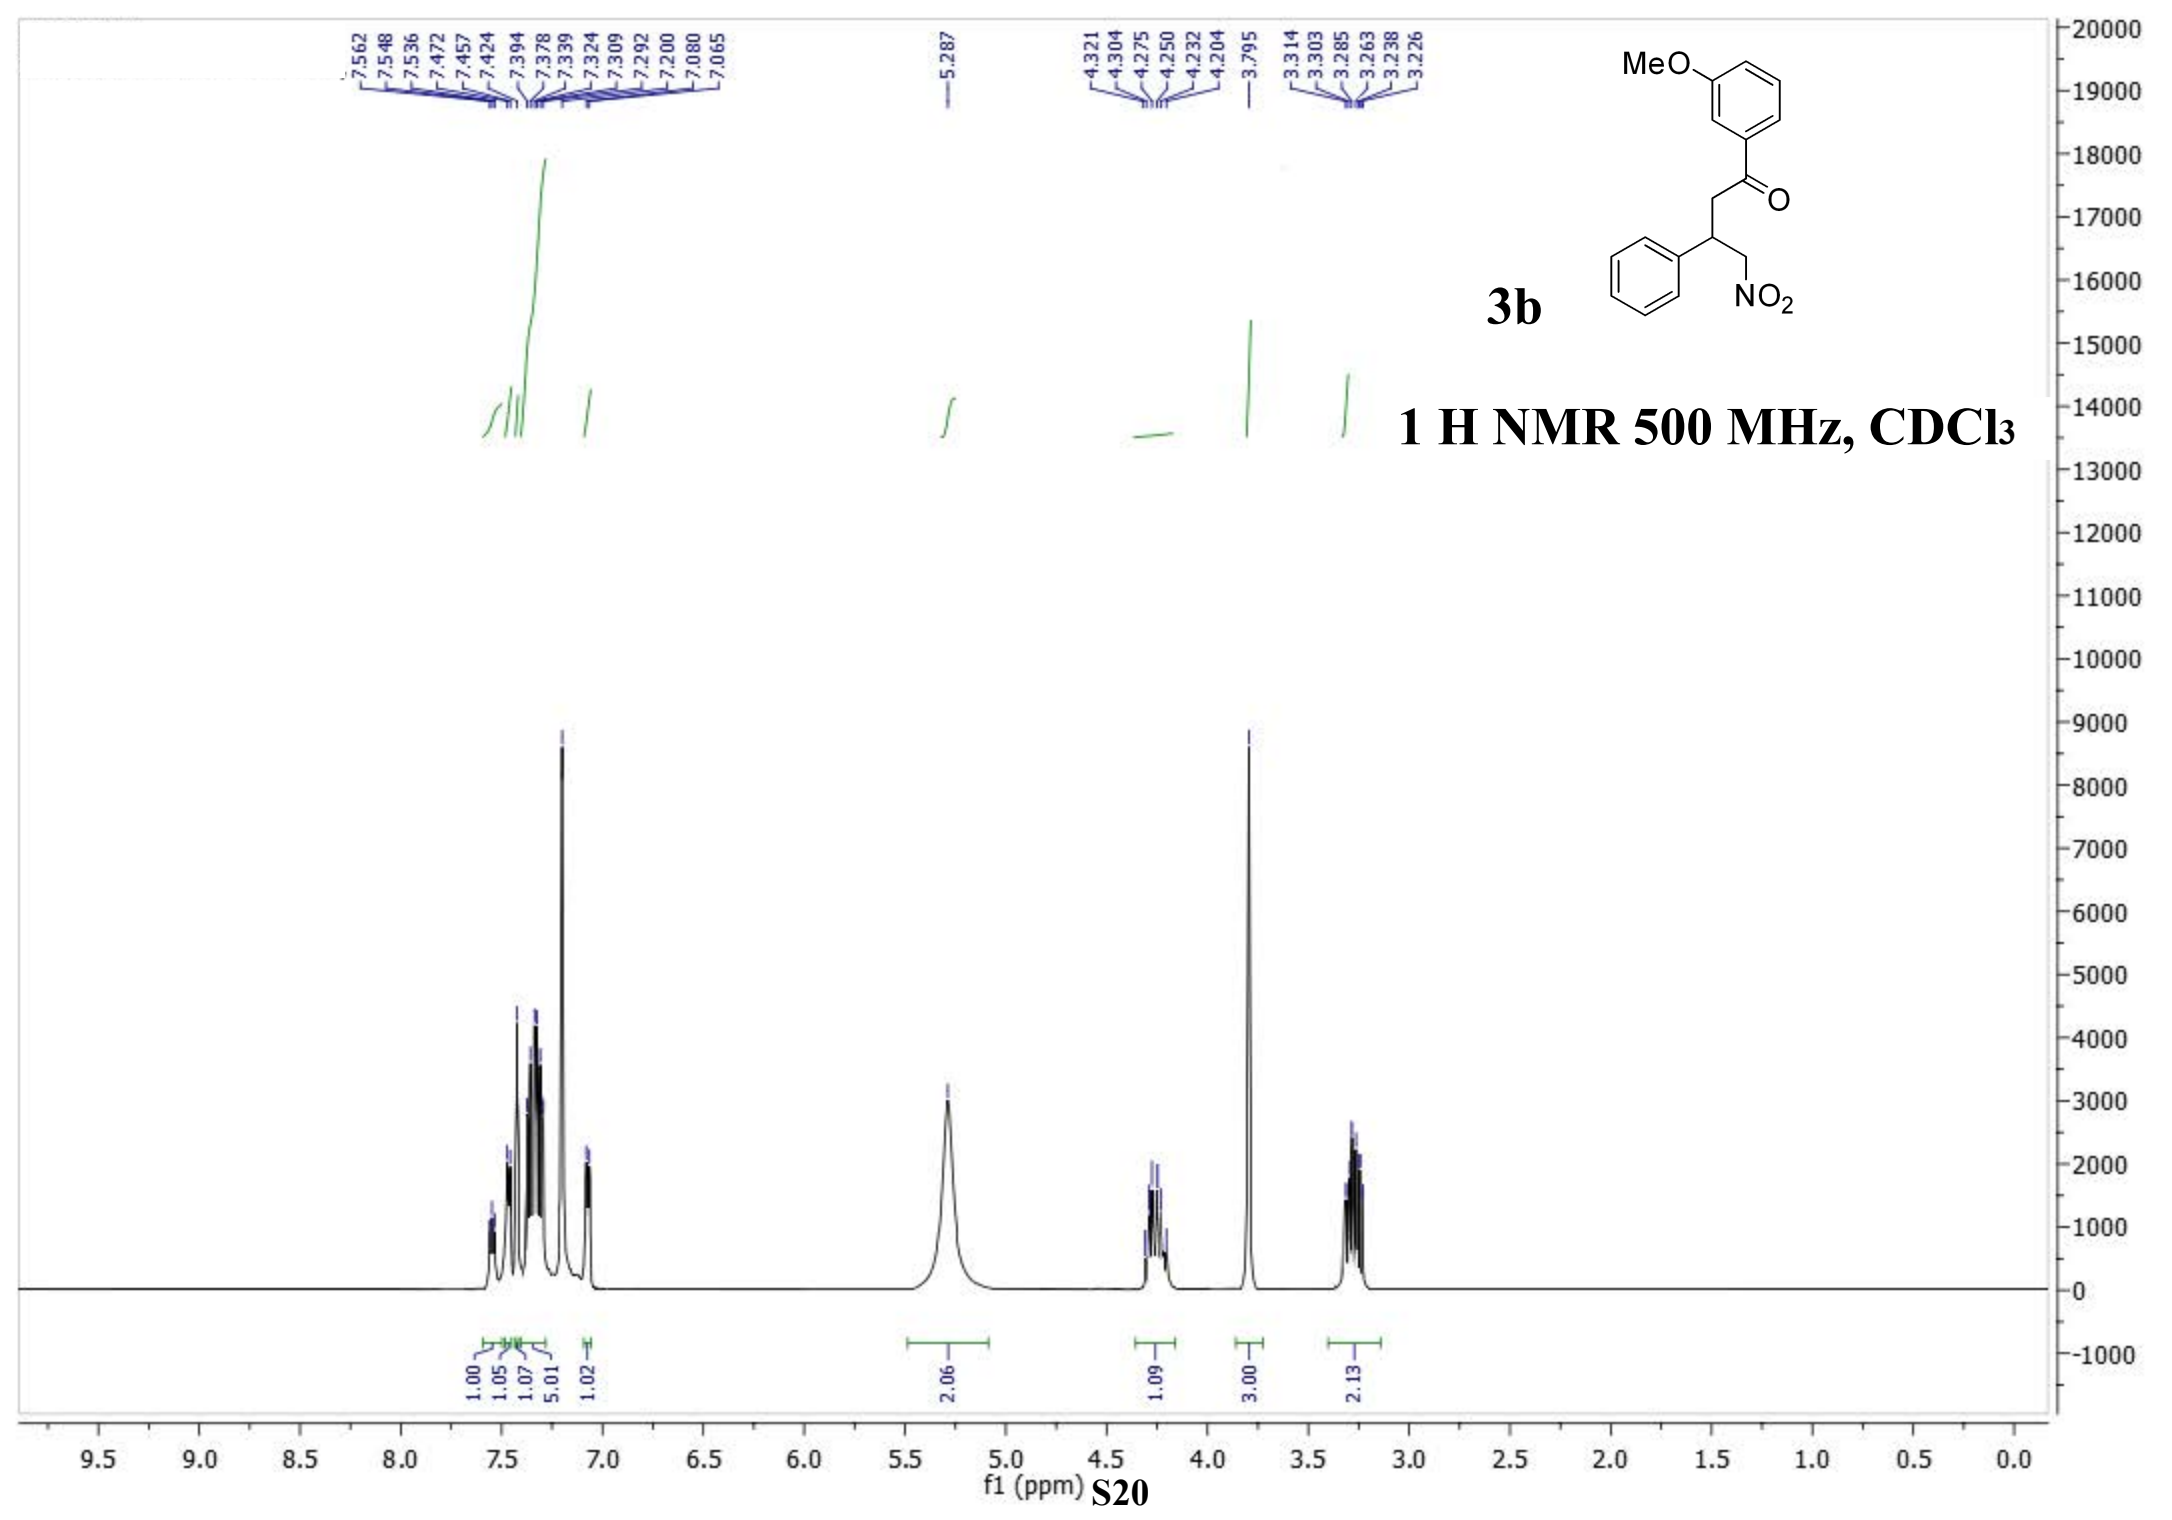

7.496  
7.480  
7.302  
7.299  
7.294  
7.291  
7.287  
7.281  
7.277  
7.265  
7.262  
7.249  
7.200  
7.185  
7.174  
7.165  
7.160  
7.155  
7.150  
7.147

4.505  
4.490  
4.480  
4.465  
3.820  
3.807  
3.799  
3.788  
3.778  
3.415  
3.402  
3.389  
3.376

2.111

**3c**

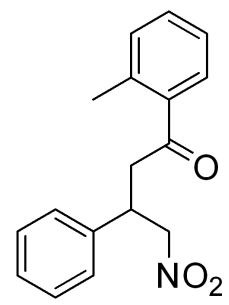

**<sup>1</sup>H NMR 500 MHz, CDCl<sub>3</sub>**

1.03  
1.00  
2.07  
5.07

2.00

1.11

2.05

3.02

f1 (ppm) **S21**

34000  
32000  
30000  
28000  
26000  
24000  
22000  
20000  
18000  
16000  
14000  
12000  
10000  
8000  
6000  
4000  
2000  
0  
-2000

**3d**  
**<sup>1</sup>H NMR 500 MHz, CDCl<sub>3</sub>**

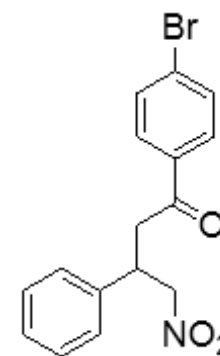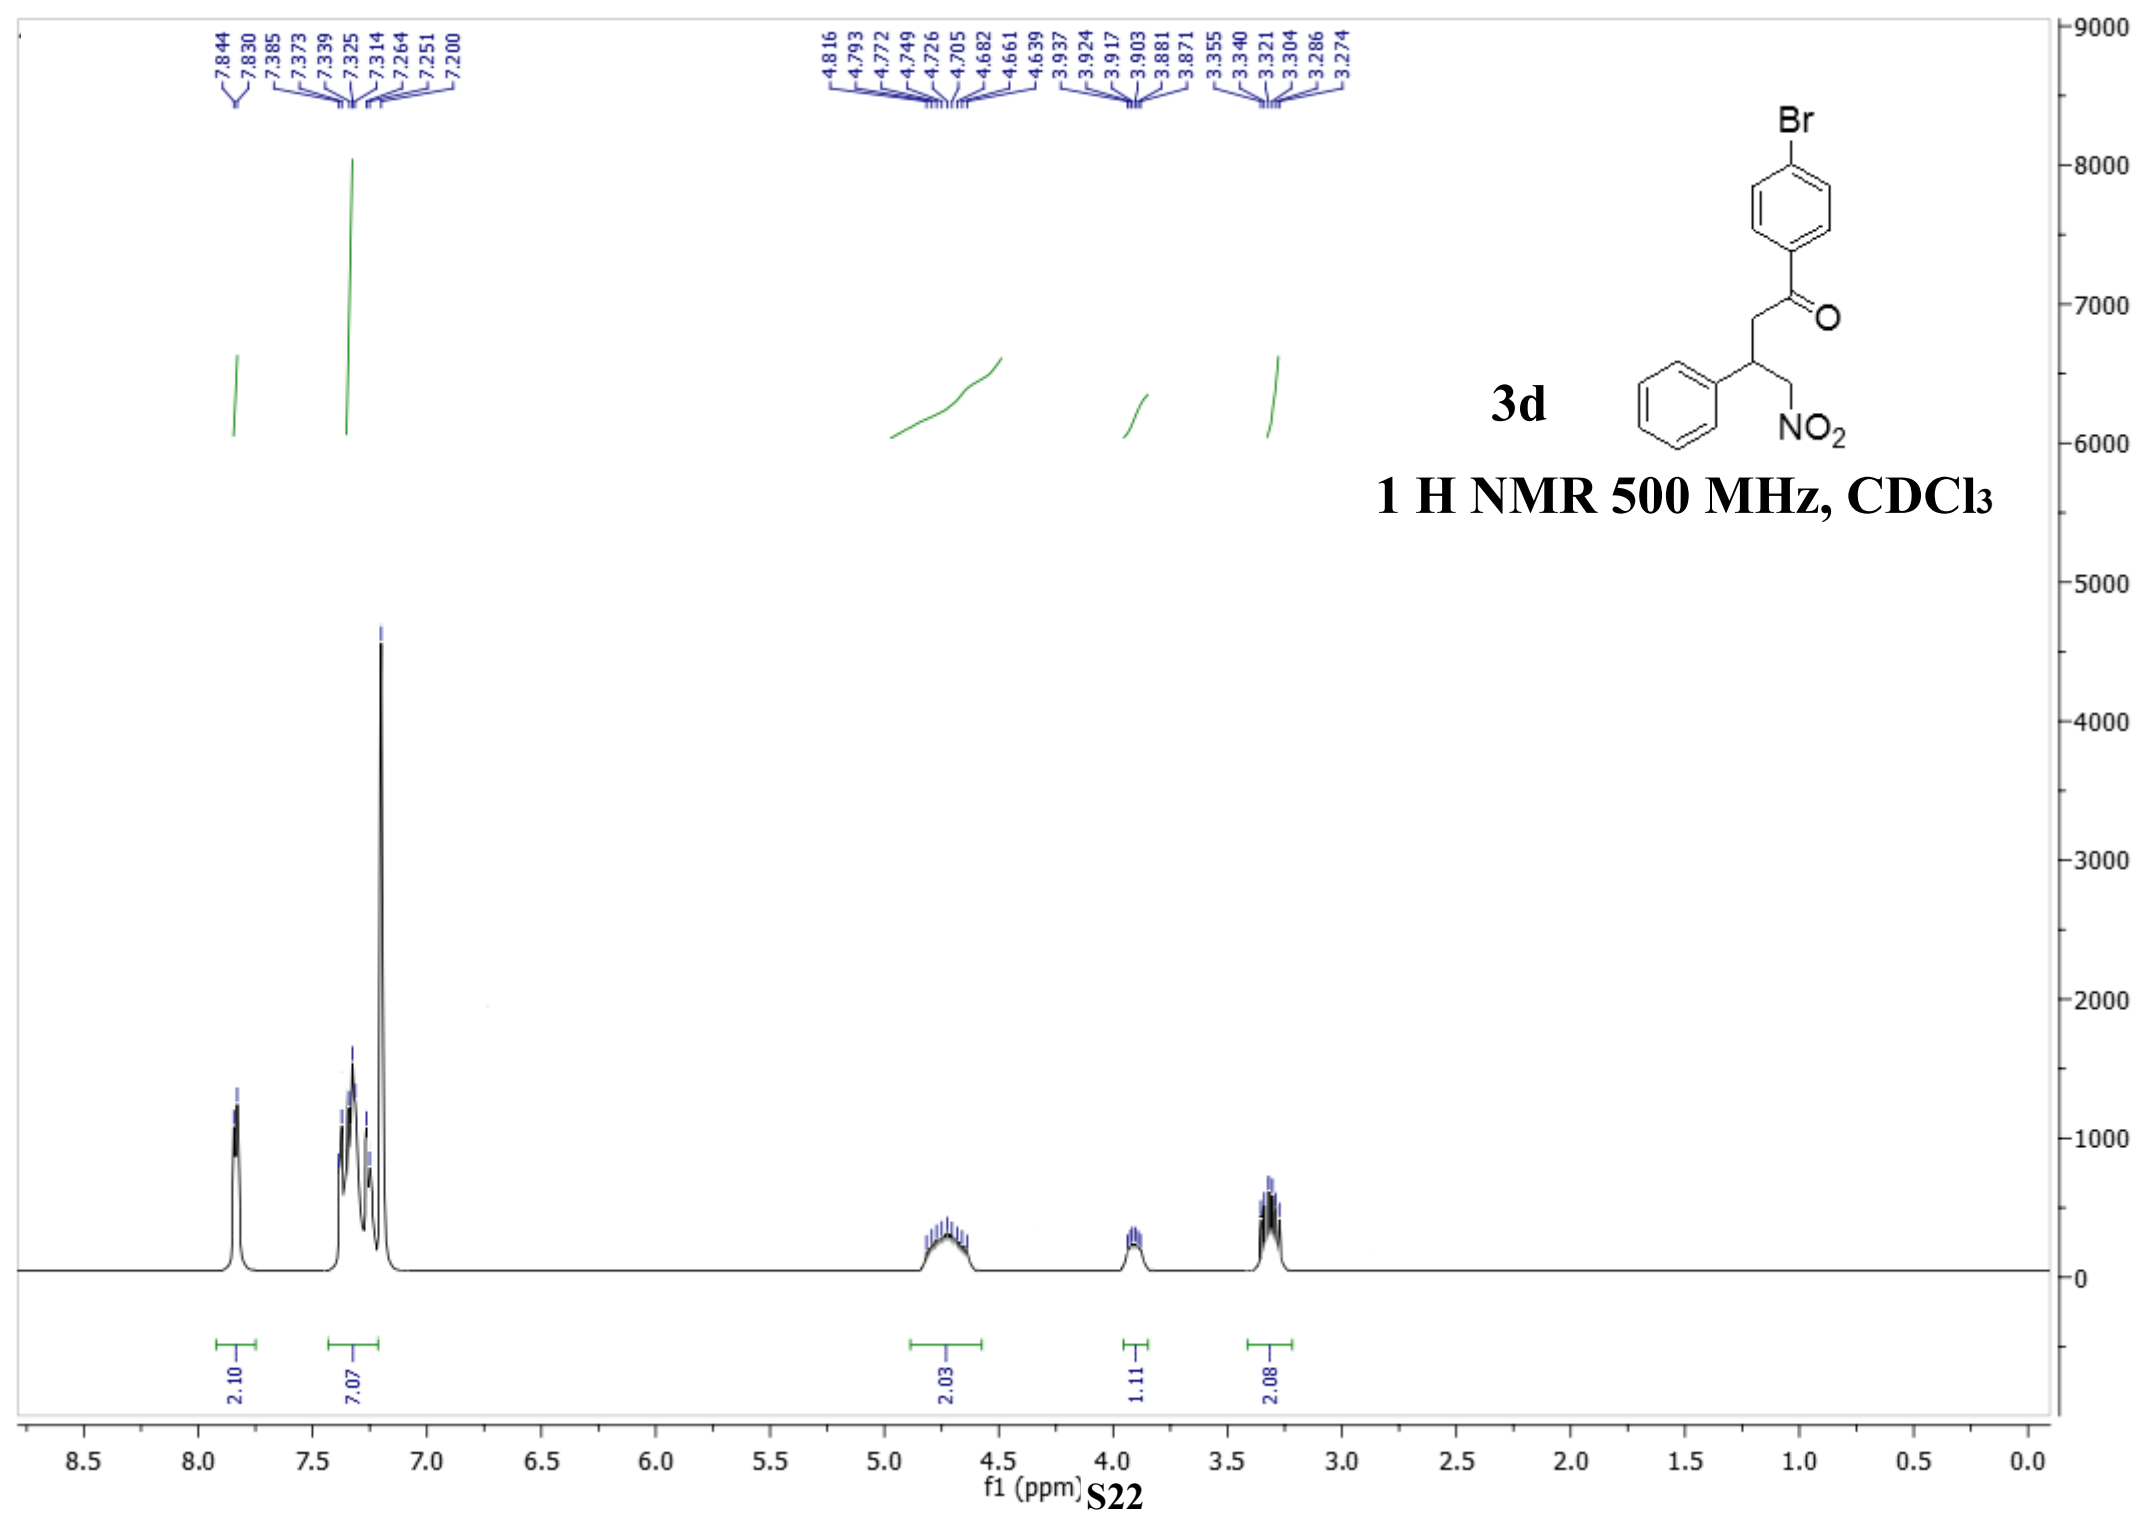

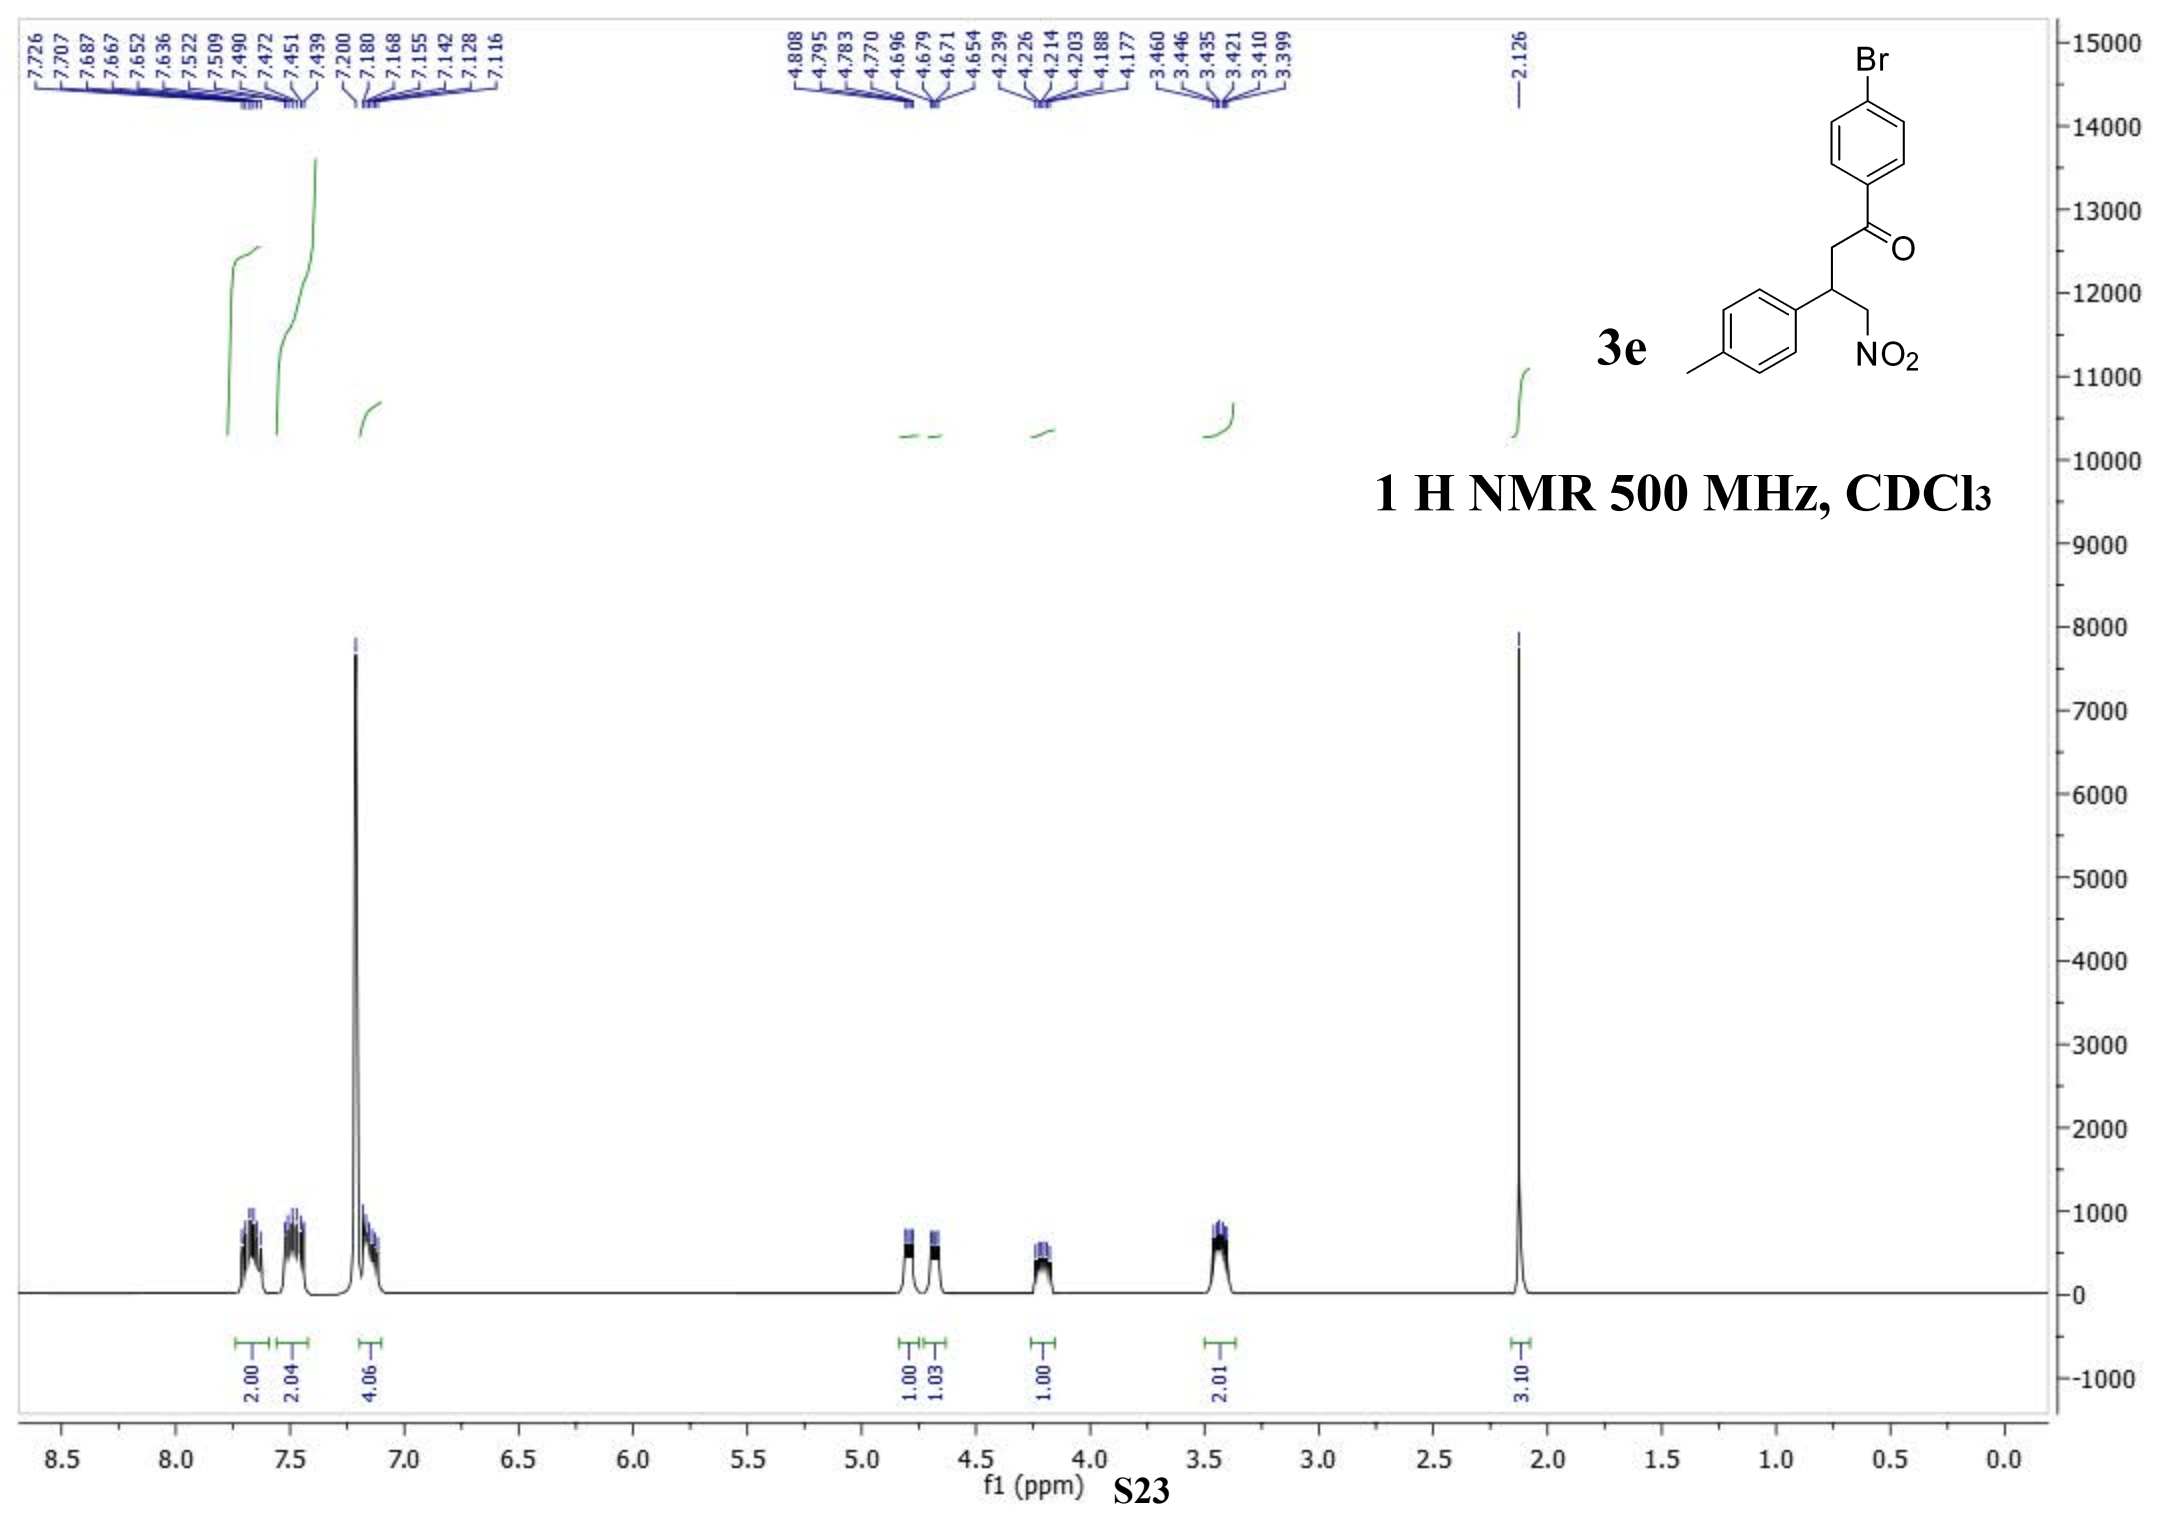

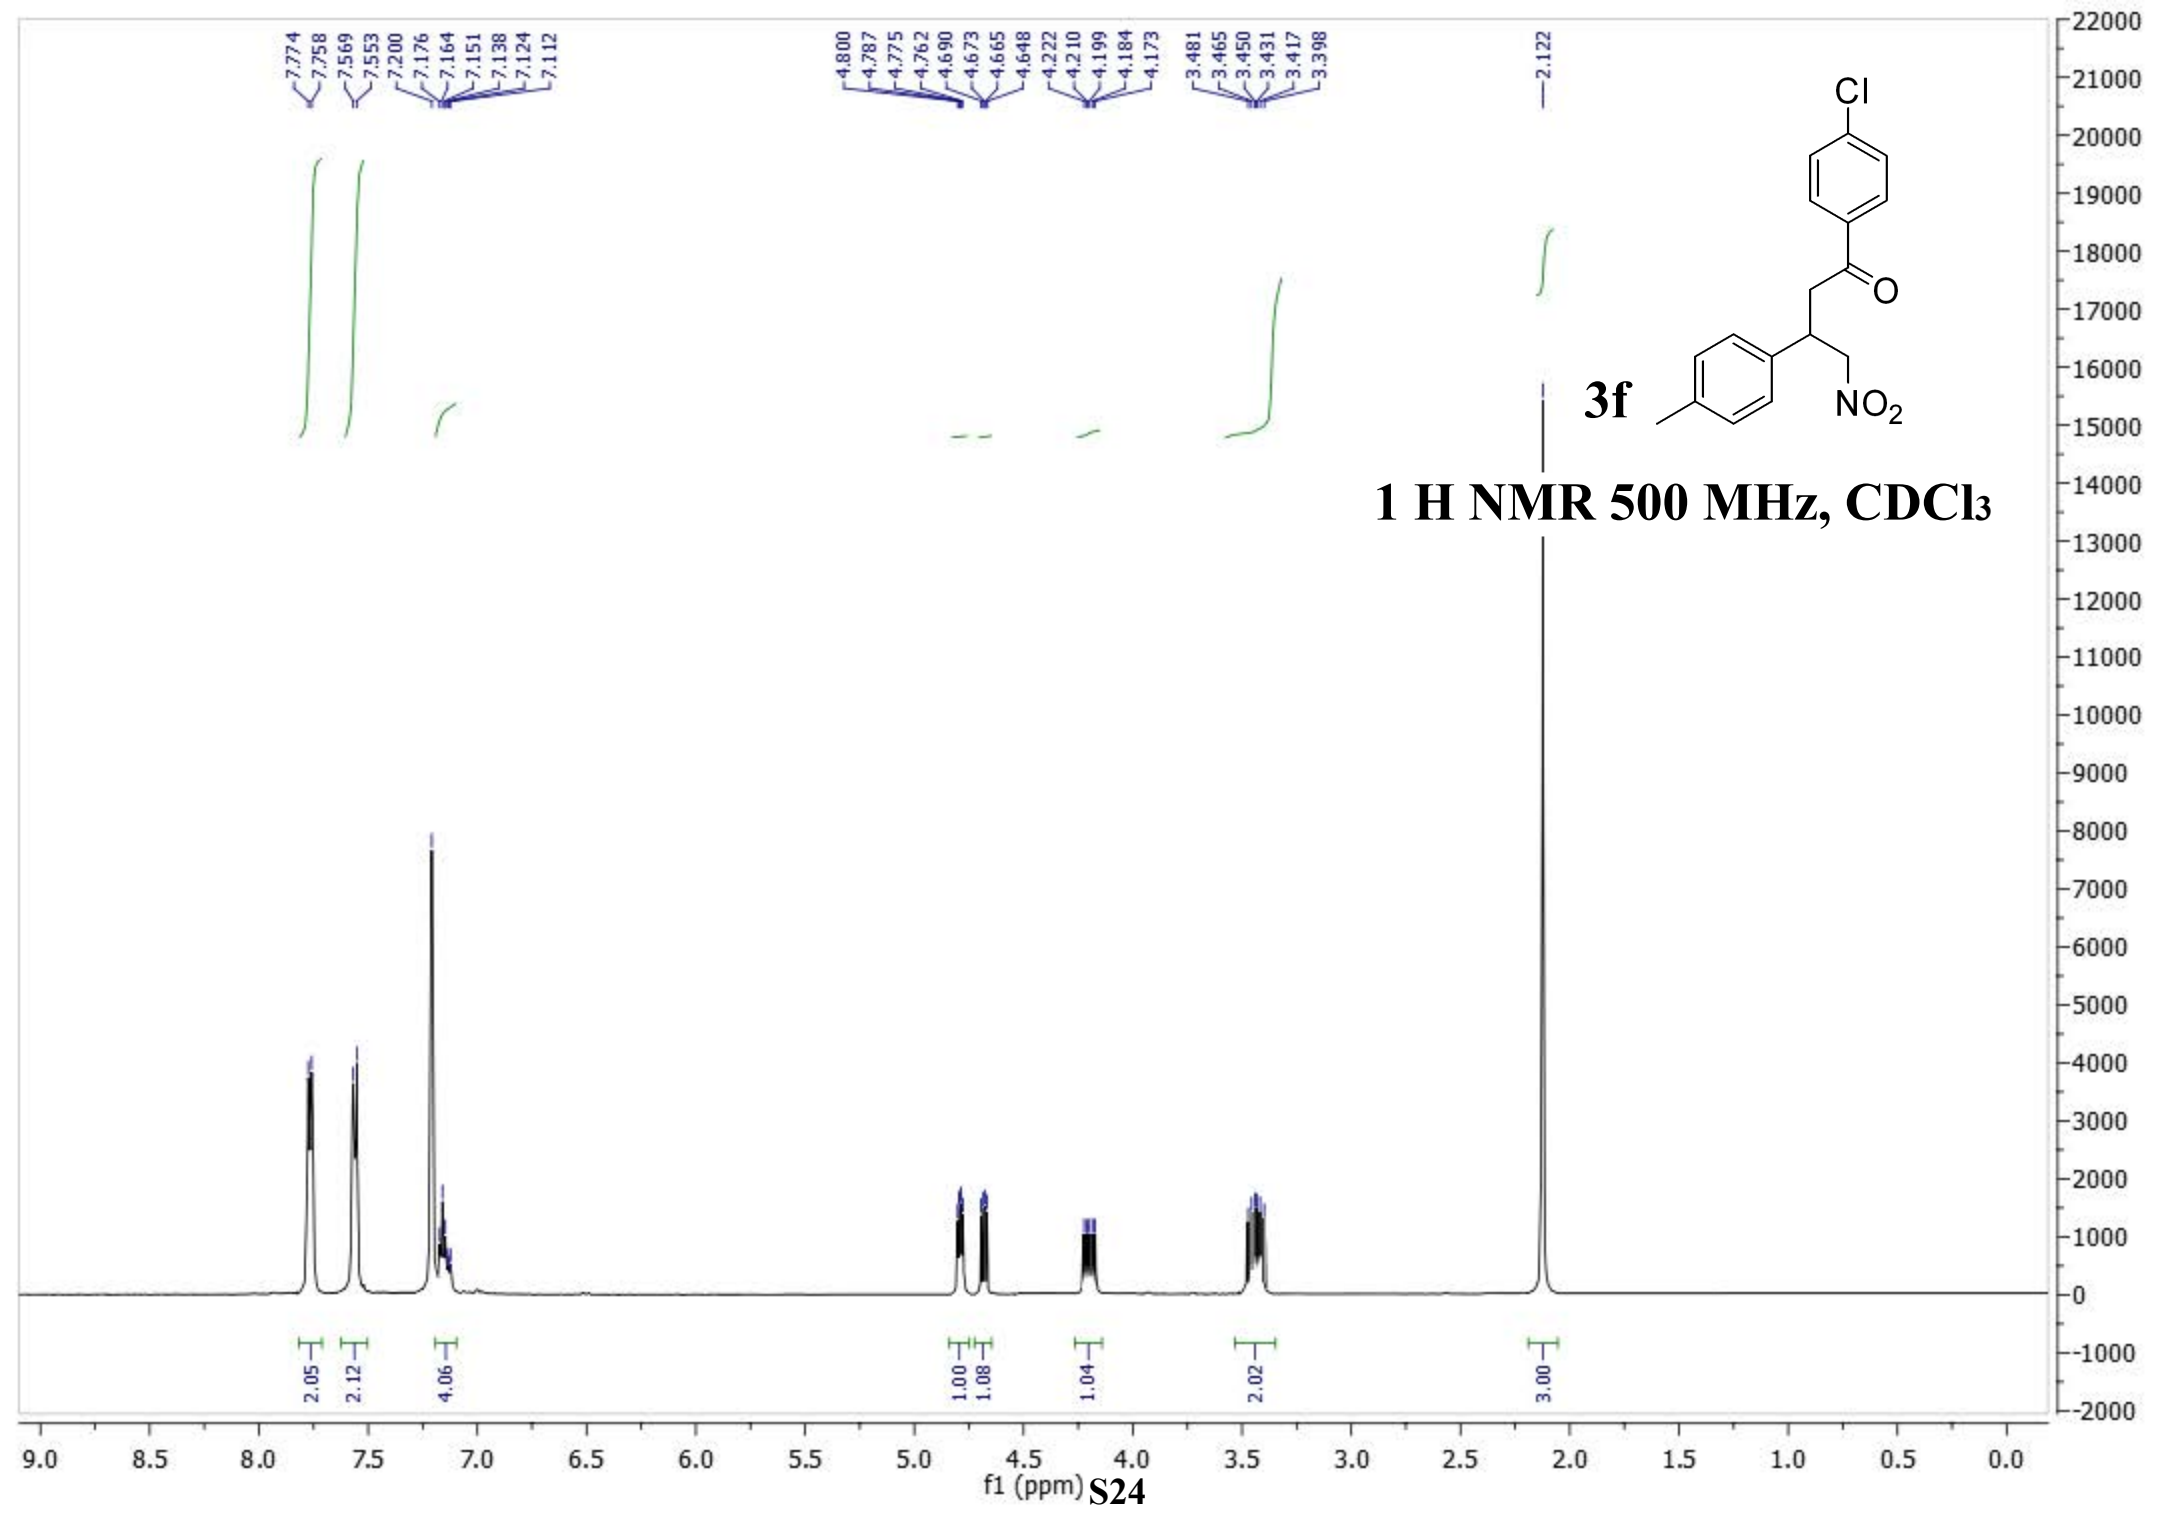



**3g**

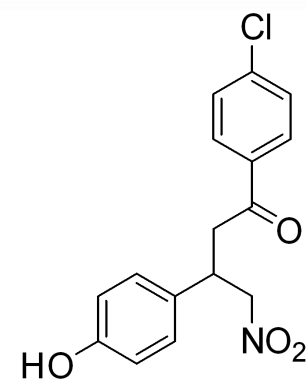

**1 H NMR 500 MHz, CDCl<sub>3</sub>**

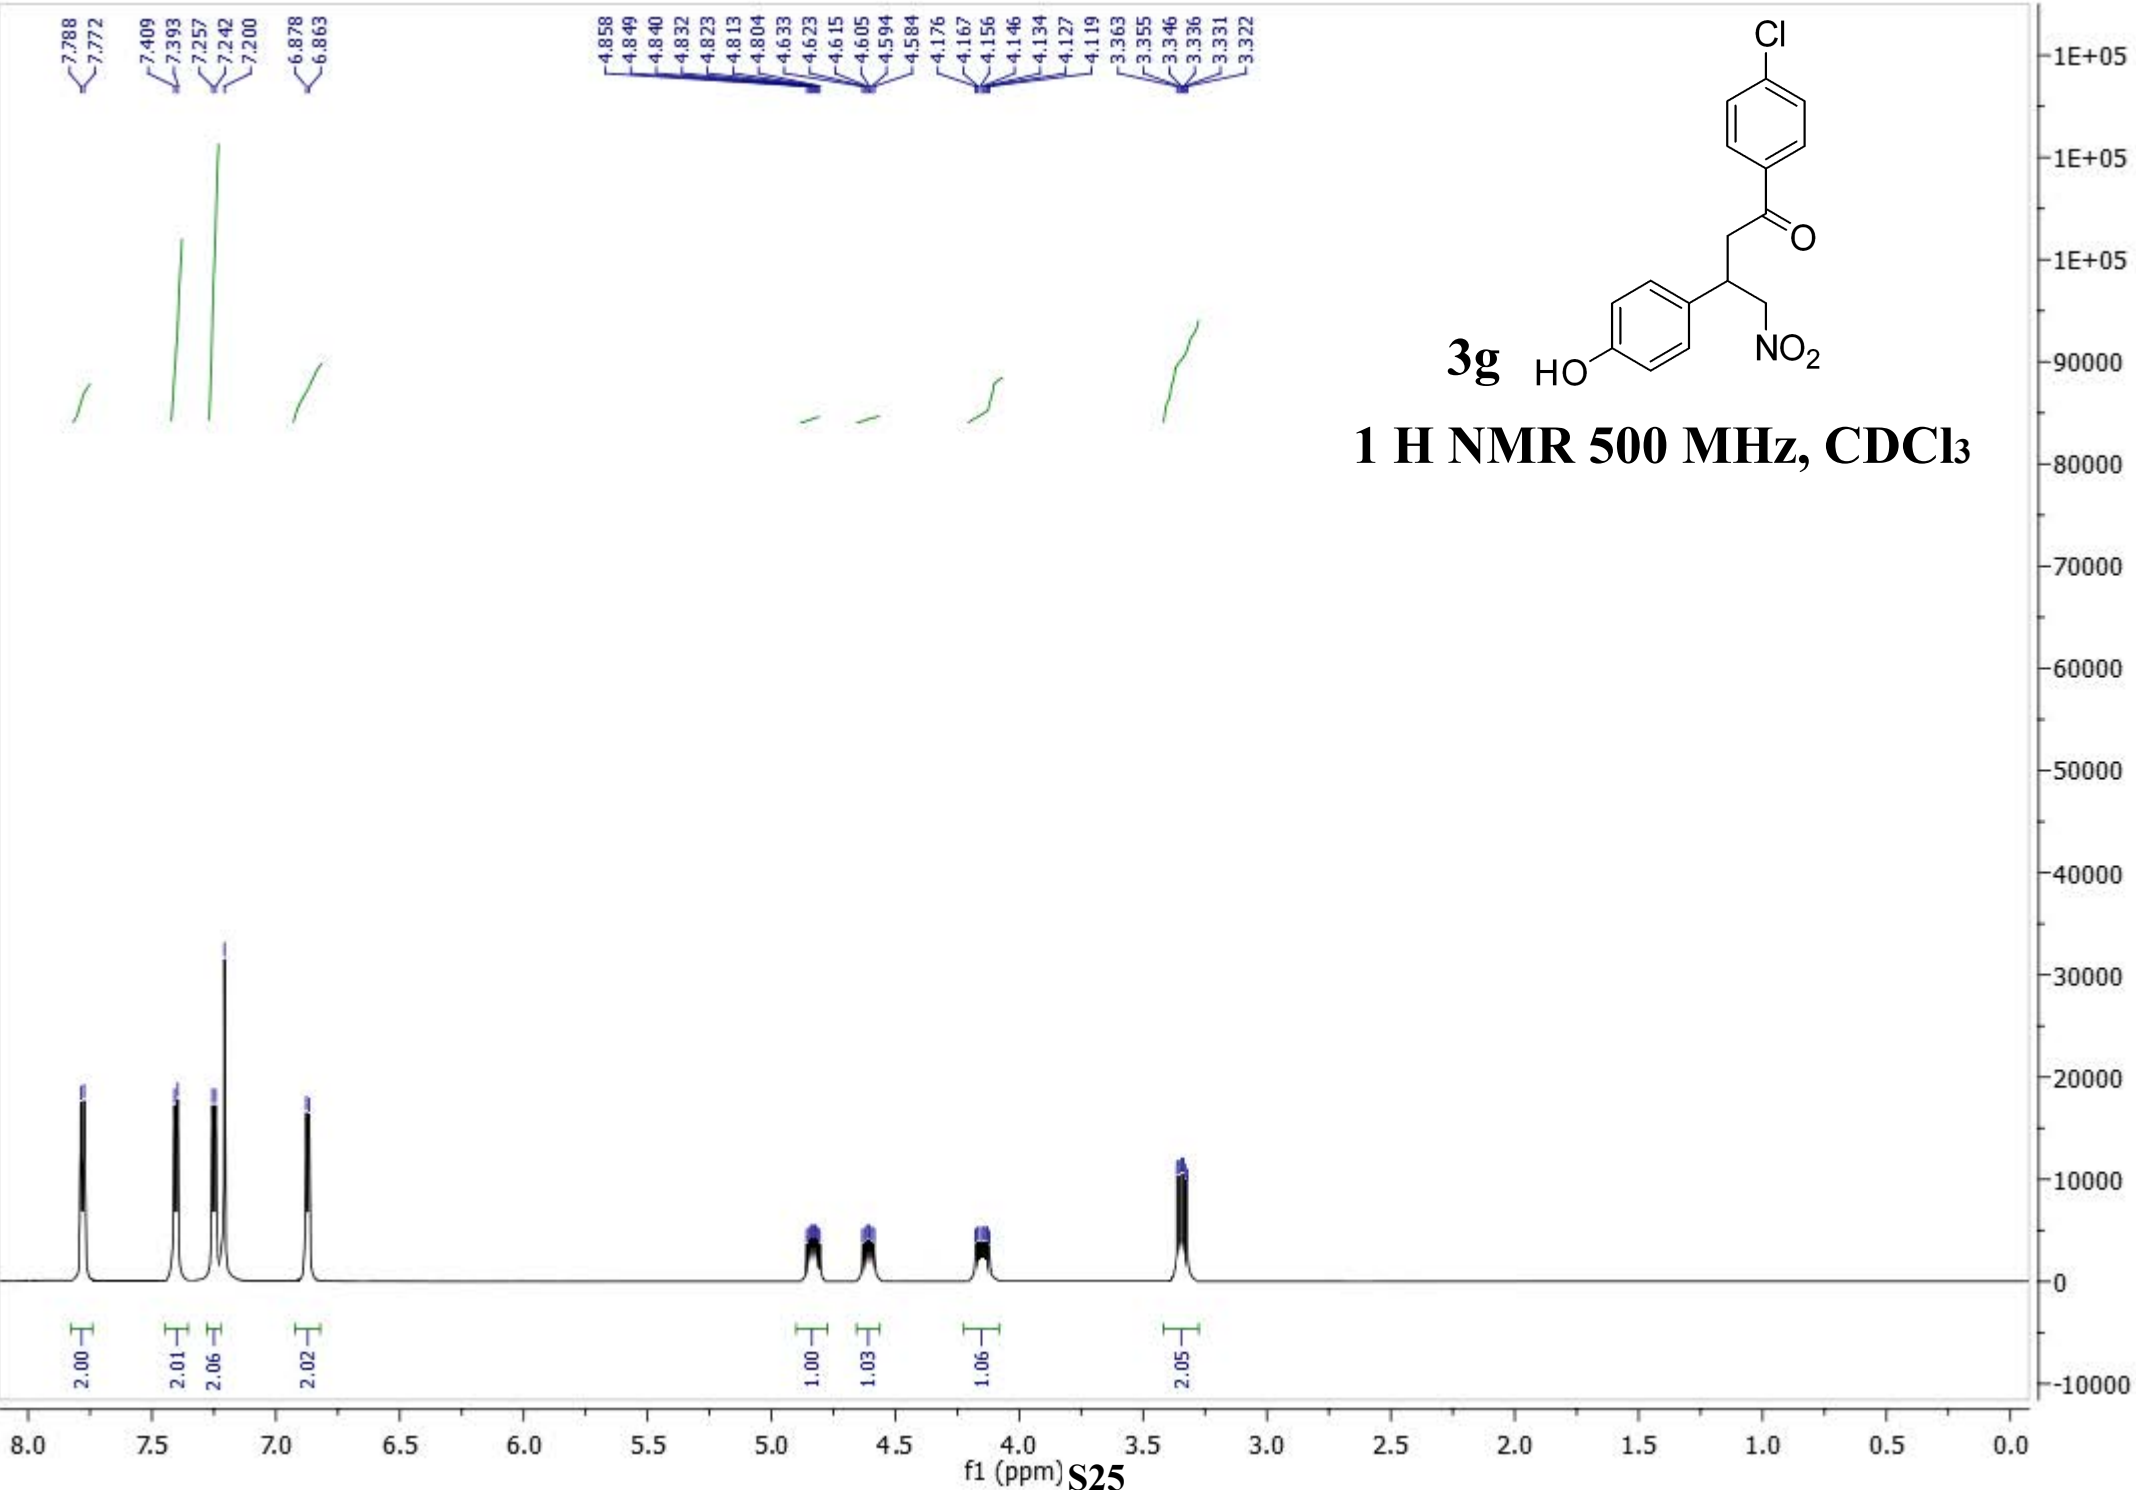

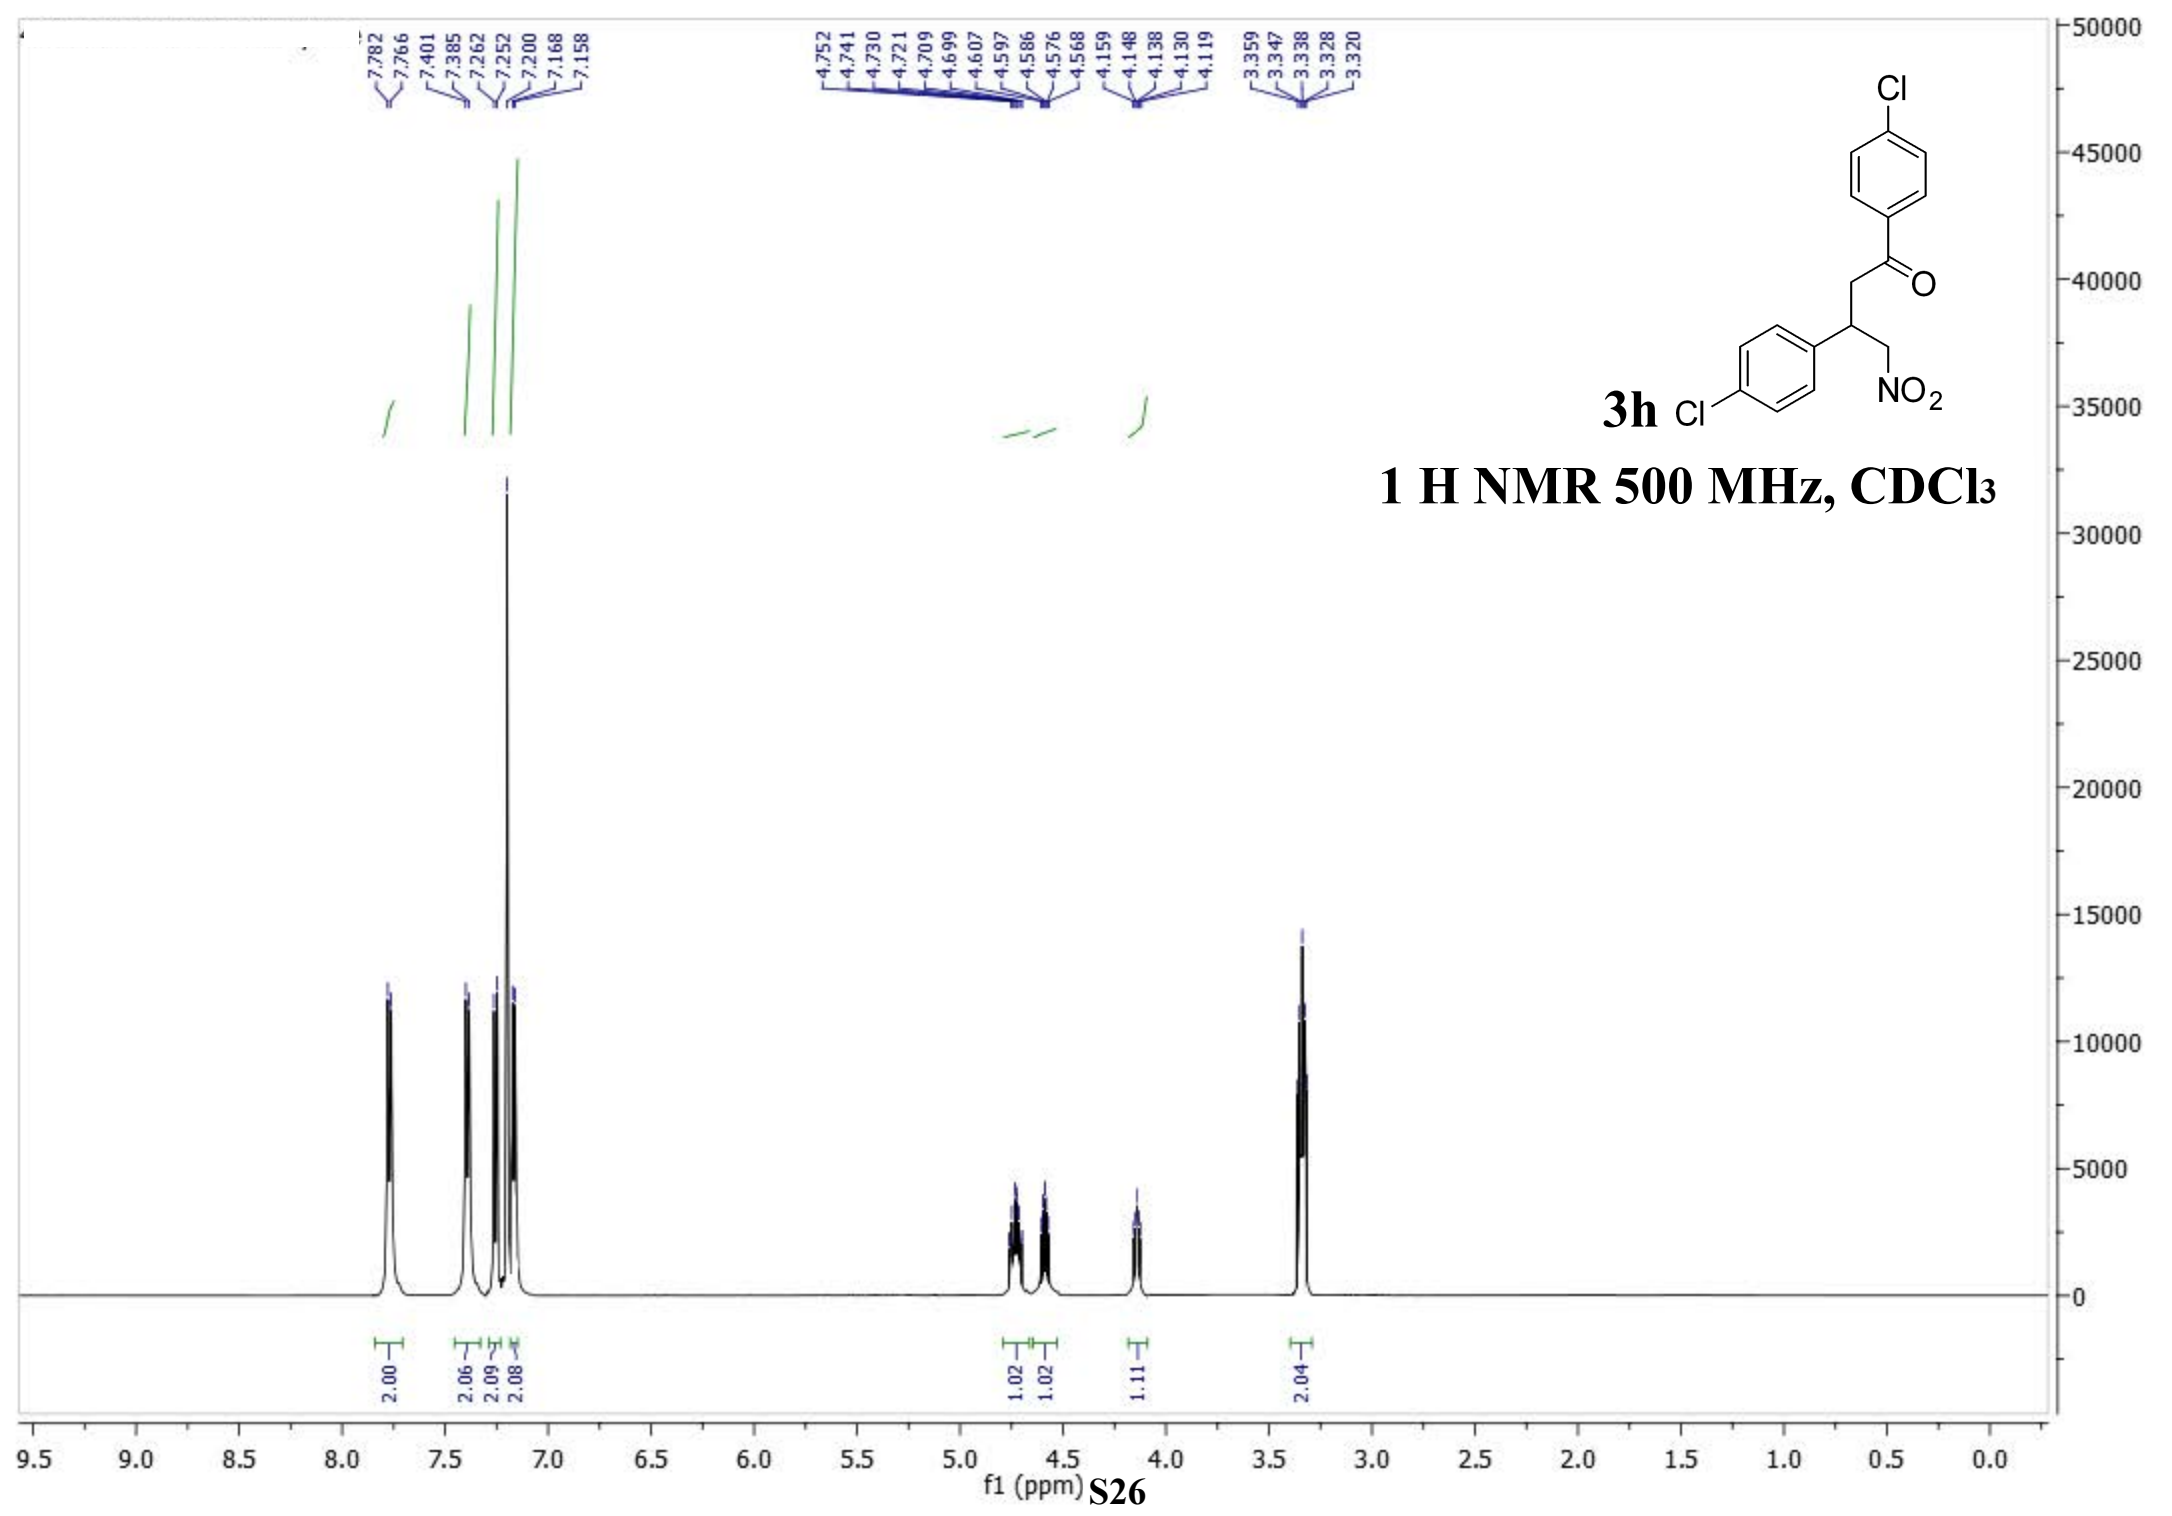

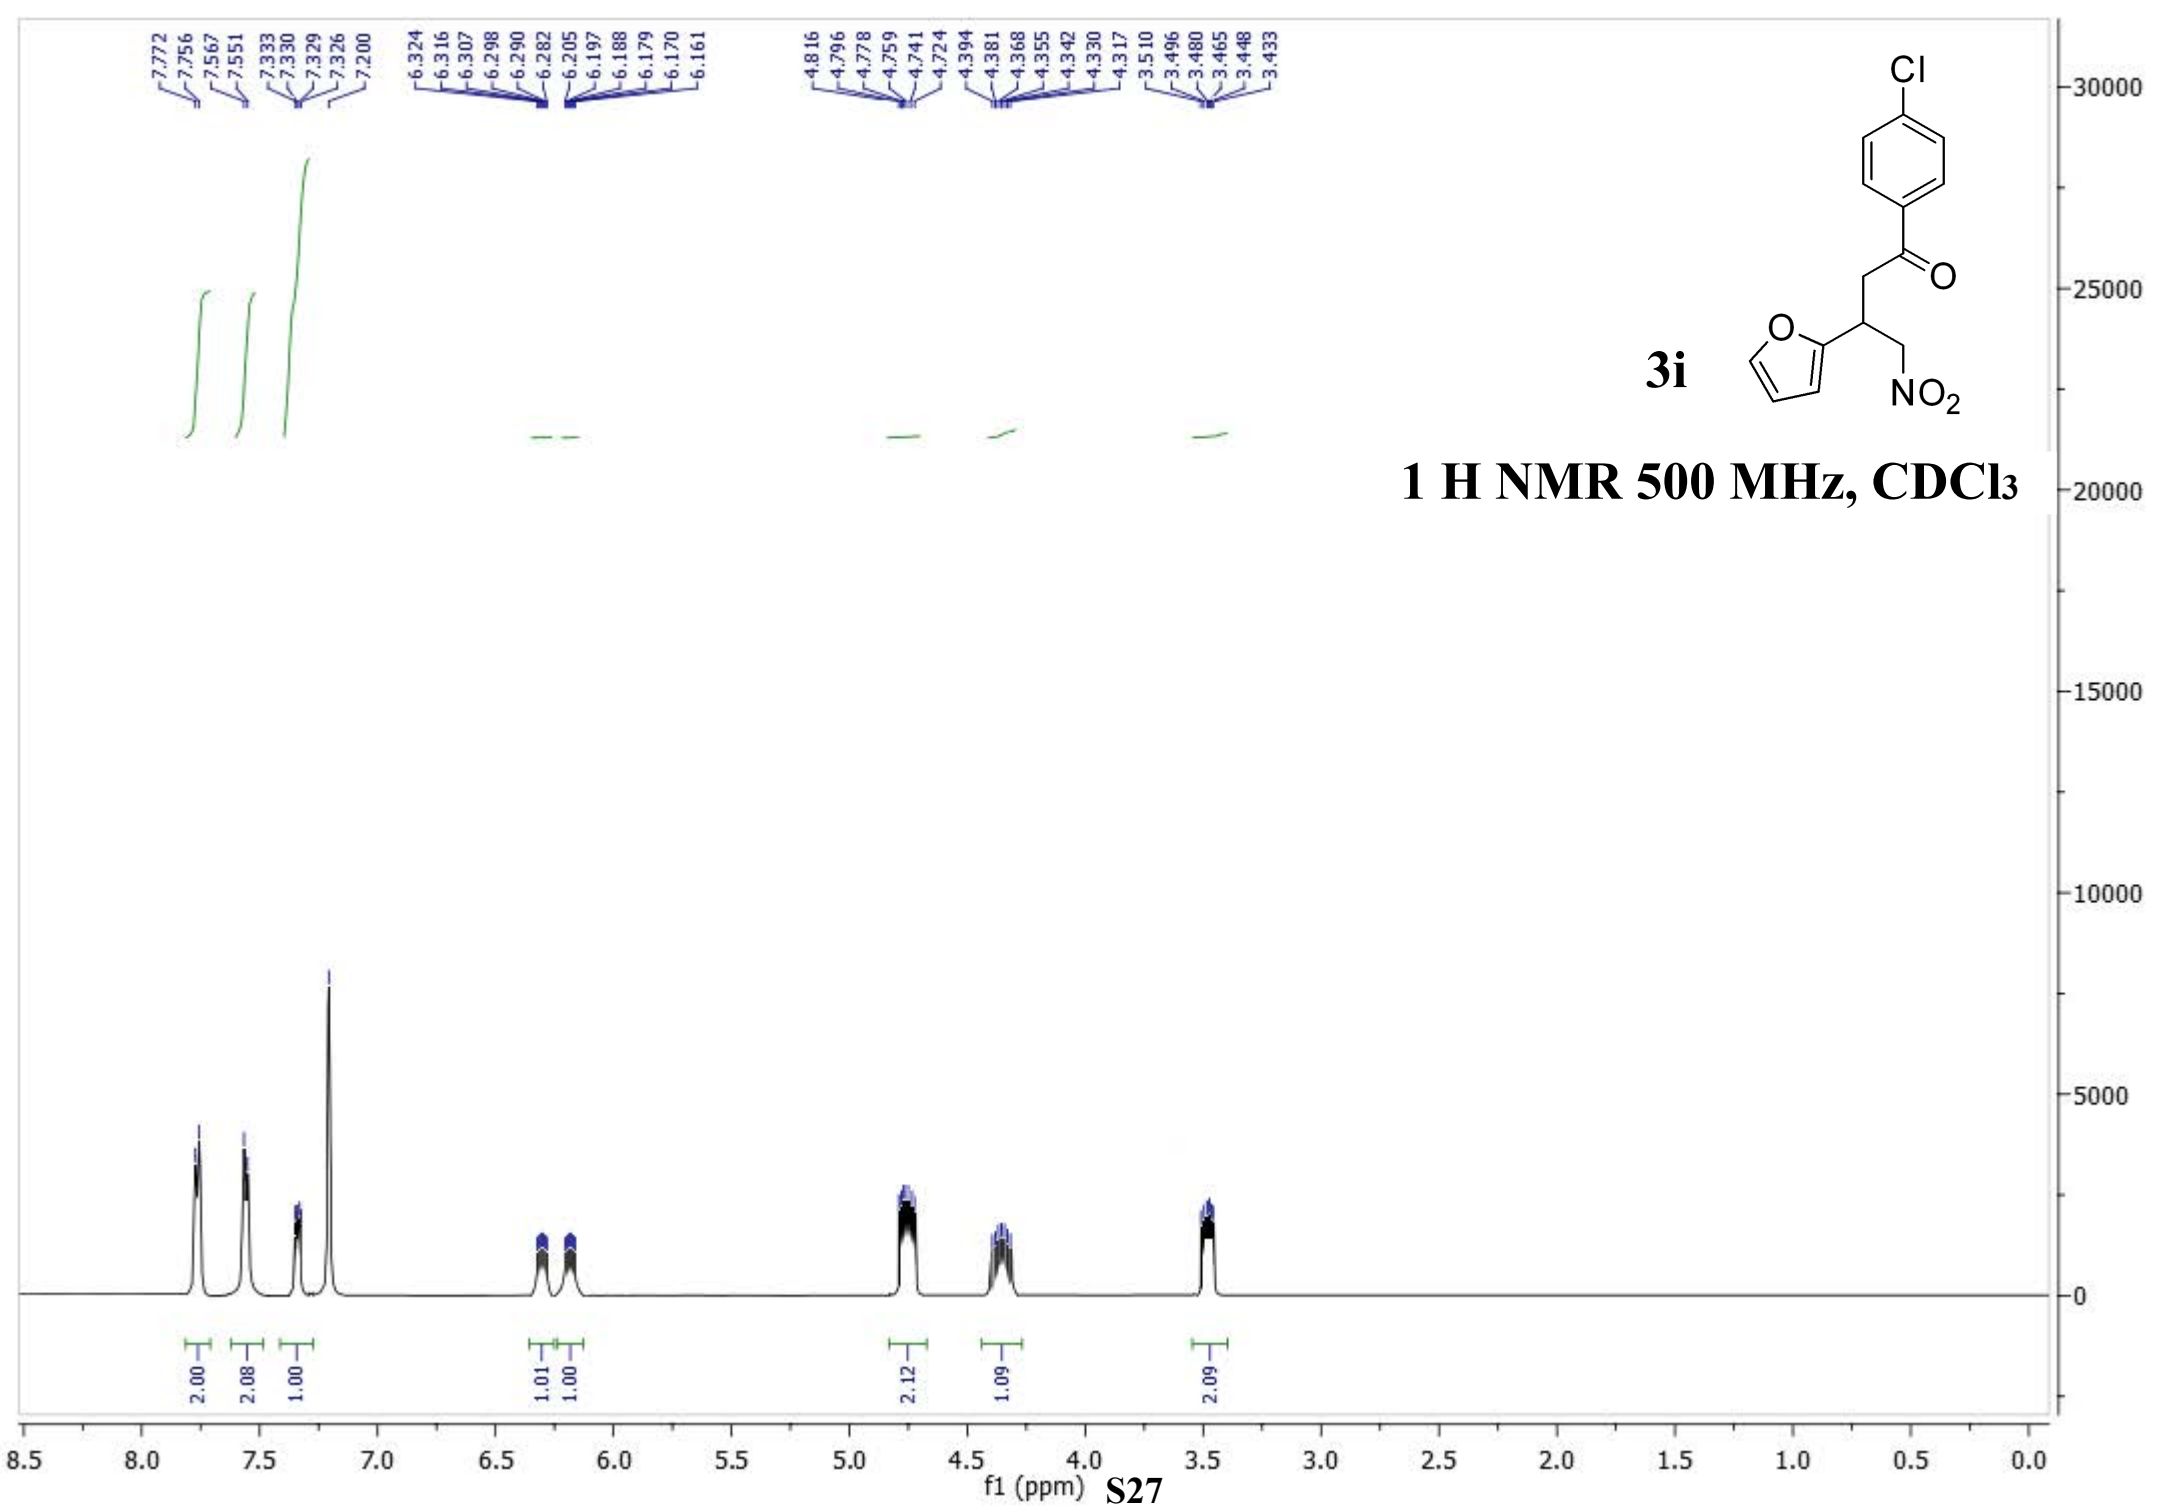

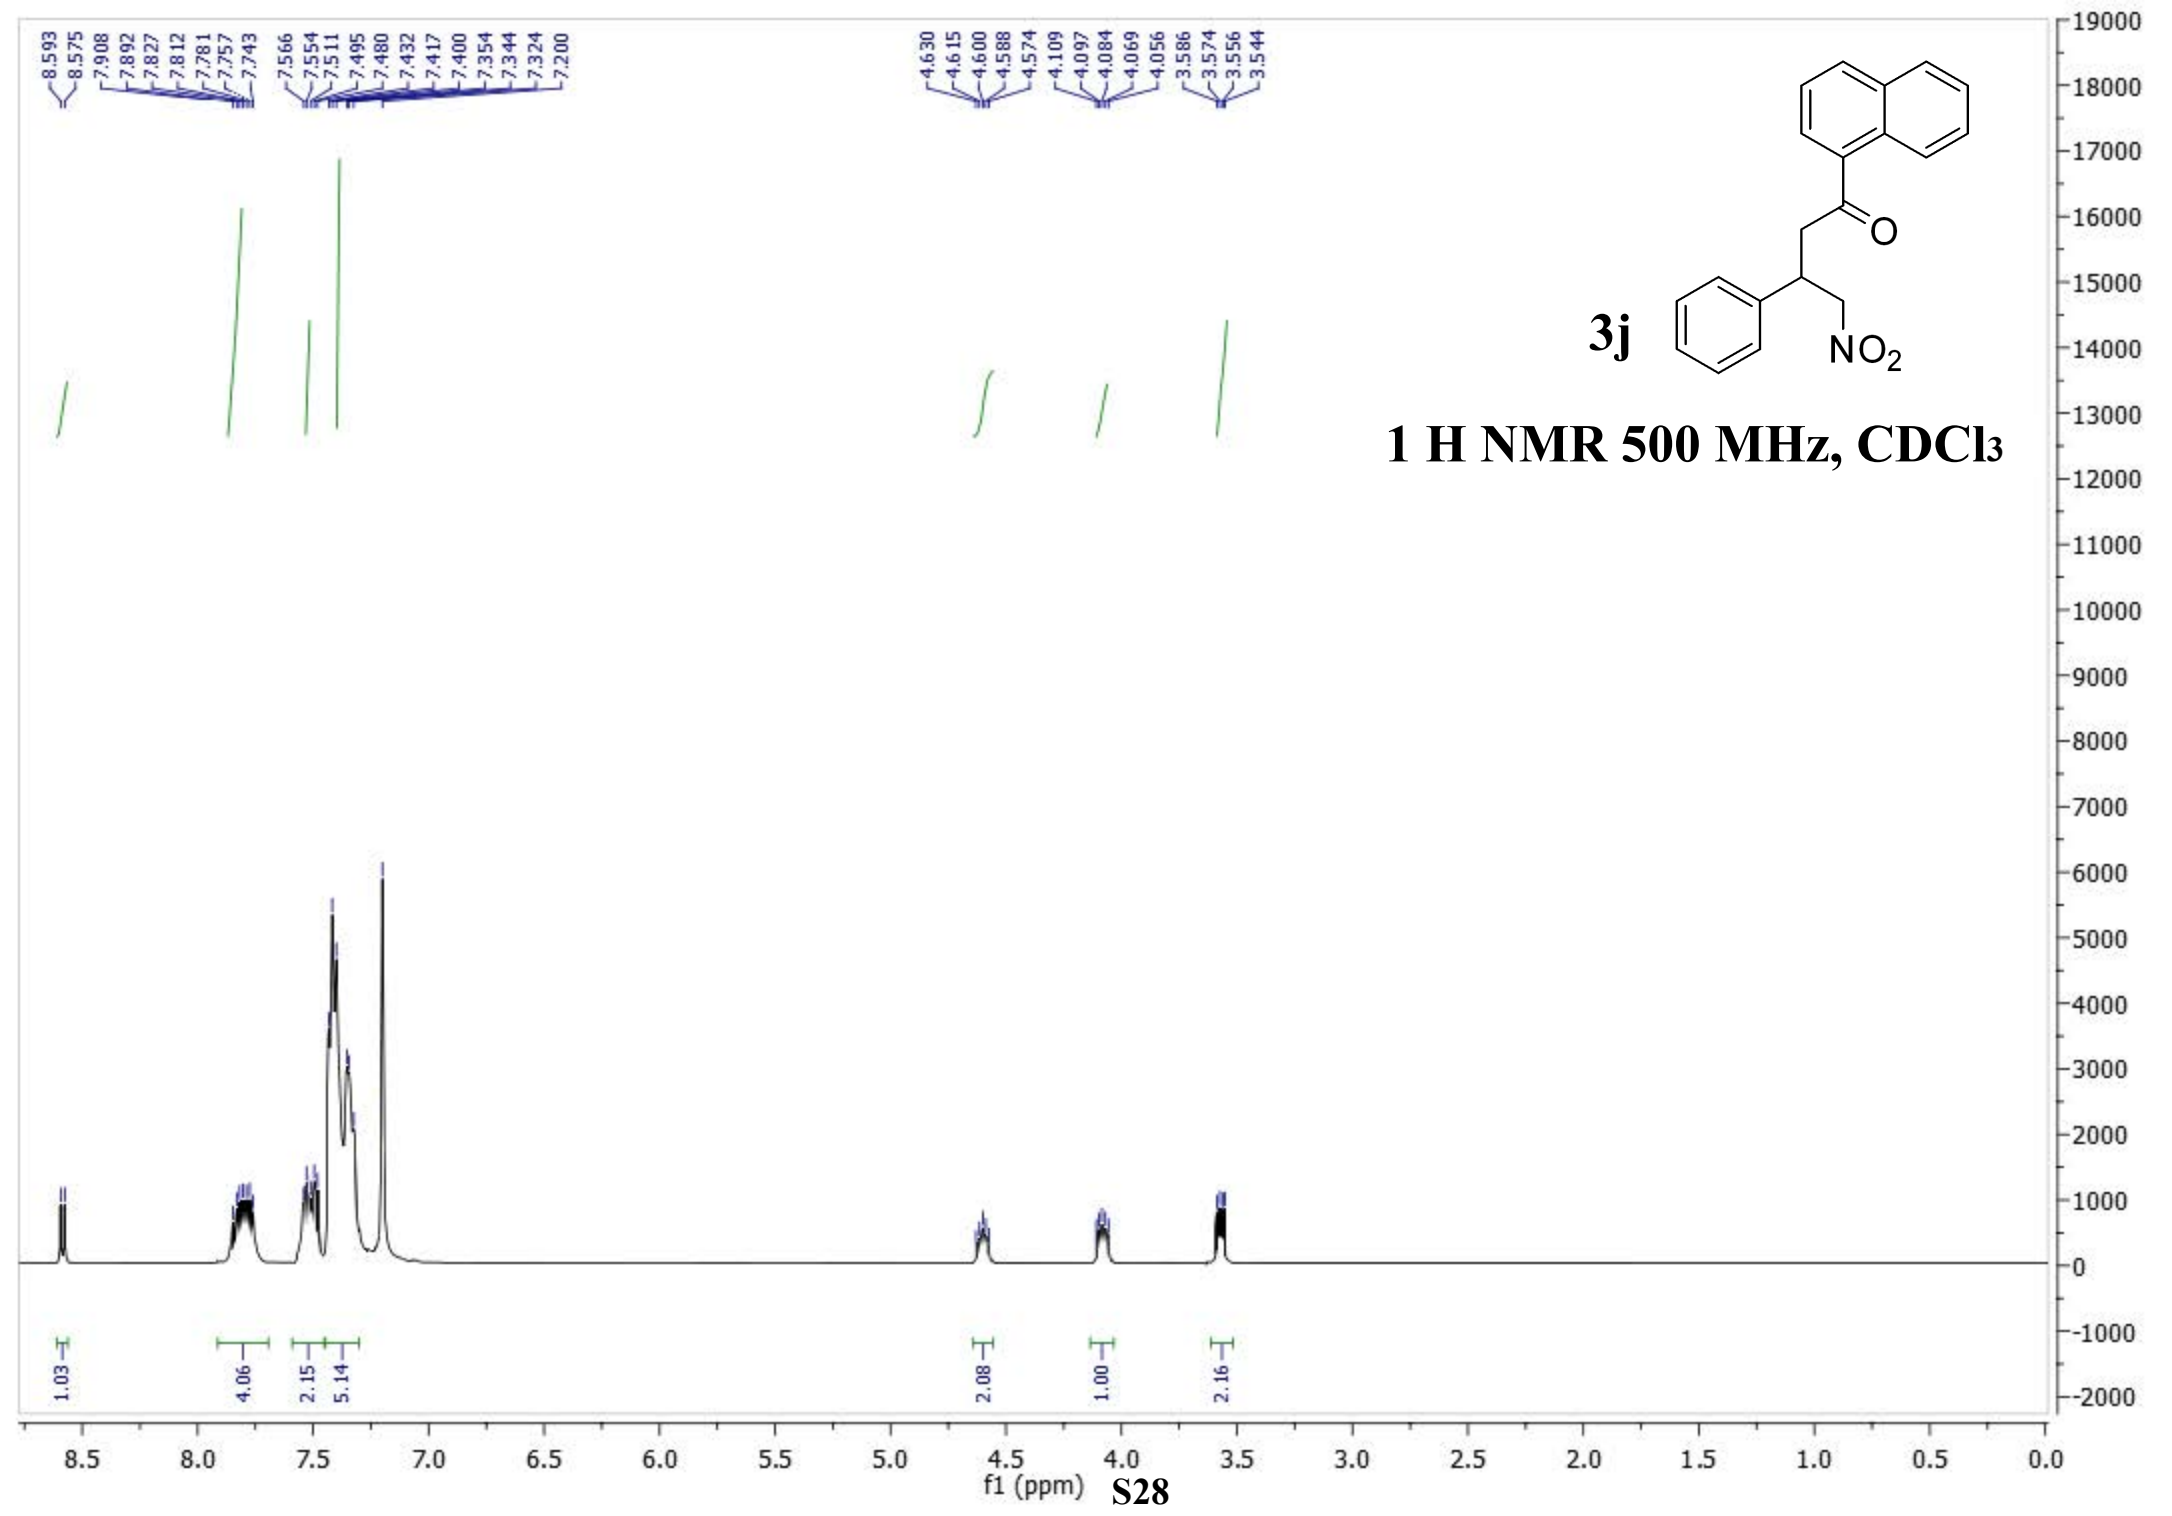

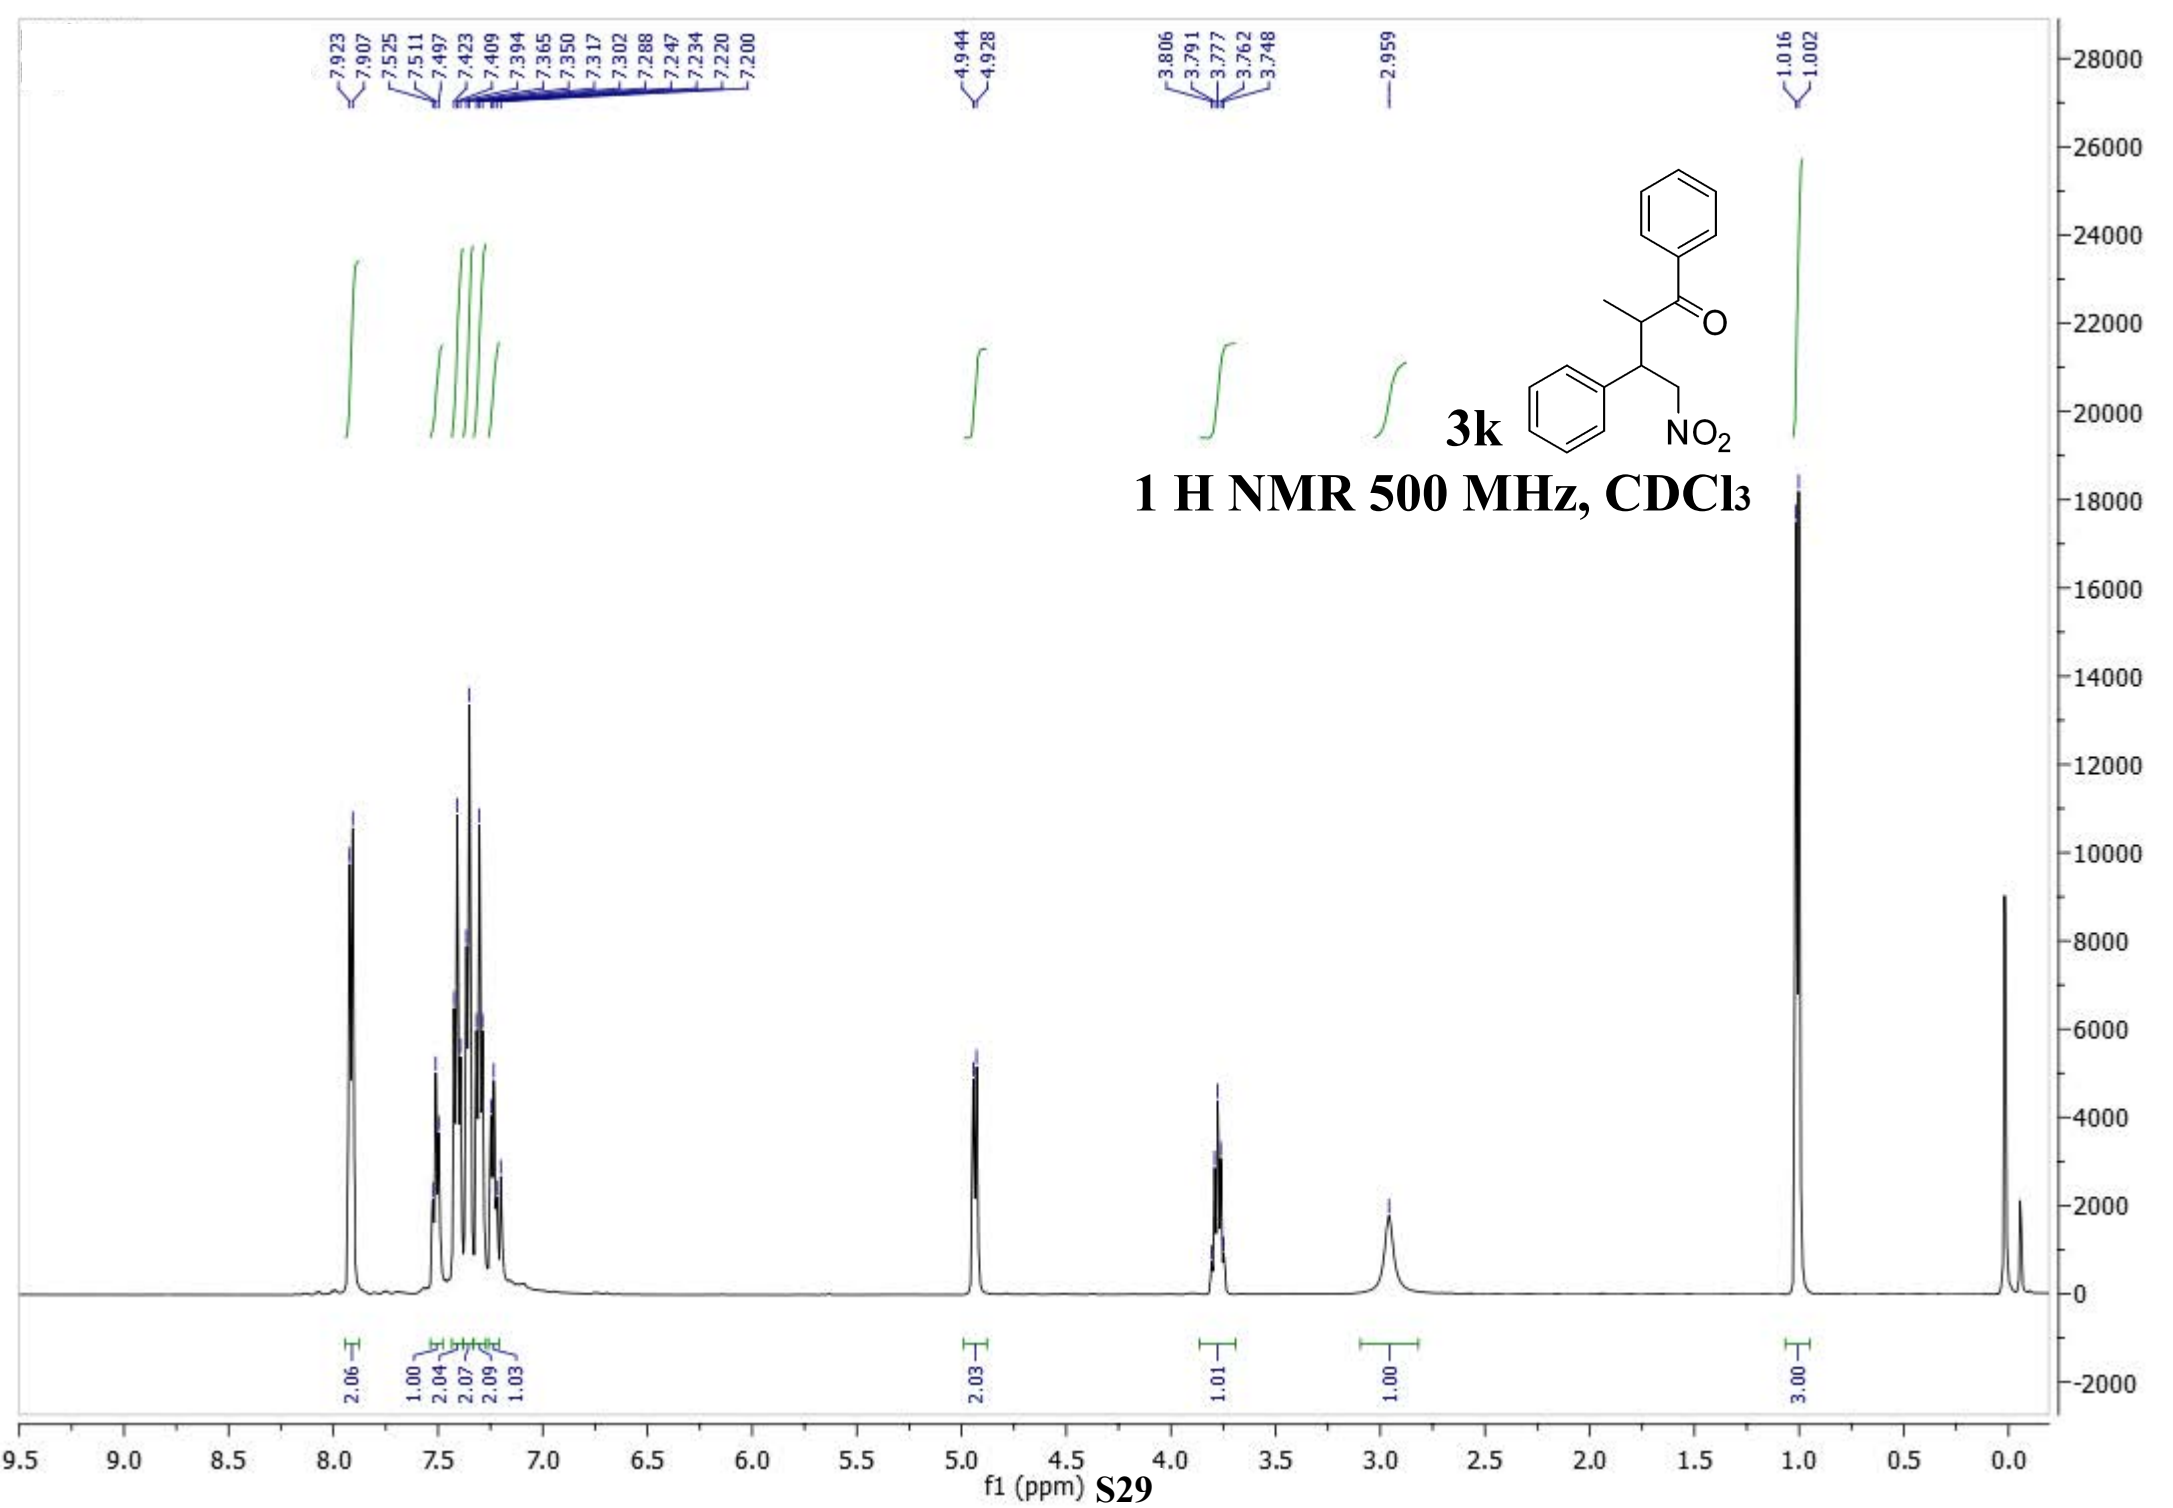

**31**

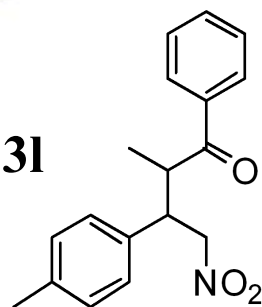

**<sup>1</sup>H NMR 500 MHz, CDCl<sub>3</sub>**

7.934  
7.920  
7.544  
7.527  
7.514  
7.499  
7.256  
7.240  
7.224  
7.200  
7.122  
7.107  
7.092

5.194  
5.188  
5.156  
5.150  
4.951  
4.934  
4.914  
4.897  
3.793  
3.779  
3.764  
3.748  
3.734  
3.657  
3.651  
3.642  
3.636  
3.628  
3.621  
3.613  
3.607

2.288

1.001  
0.987

2.37  
3.08  
2.05  
2.09

1.13  
1.12

1.16  
1.19

3.00

3.11

f1 (ppm) S30

17000  
16000  
15000  
14000  
13000  
12000  
11000  
10000  
9000  
8000  
7000  
6000  
5000  
4000  
3000  
2000  
1000  
0  
-1000

**3m**

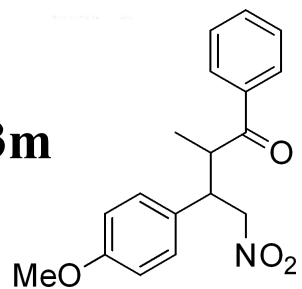

**<sup>1</sup>H NMR 500 MHz, CDCl<sub>3</sub>**

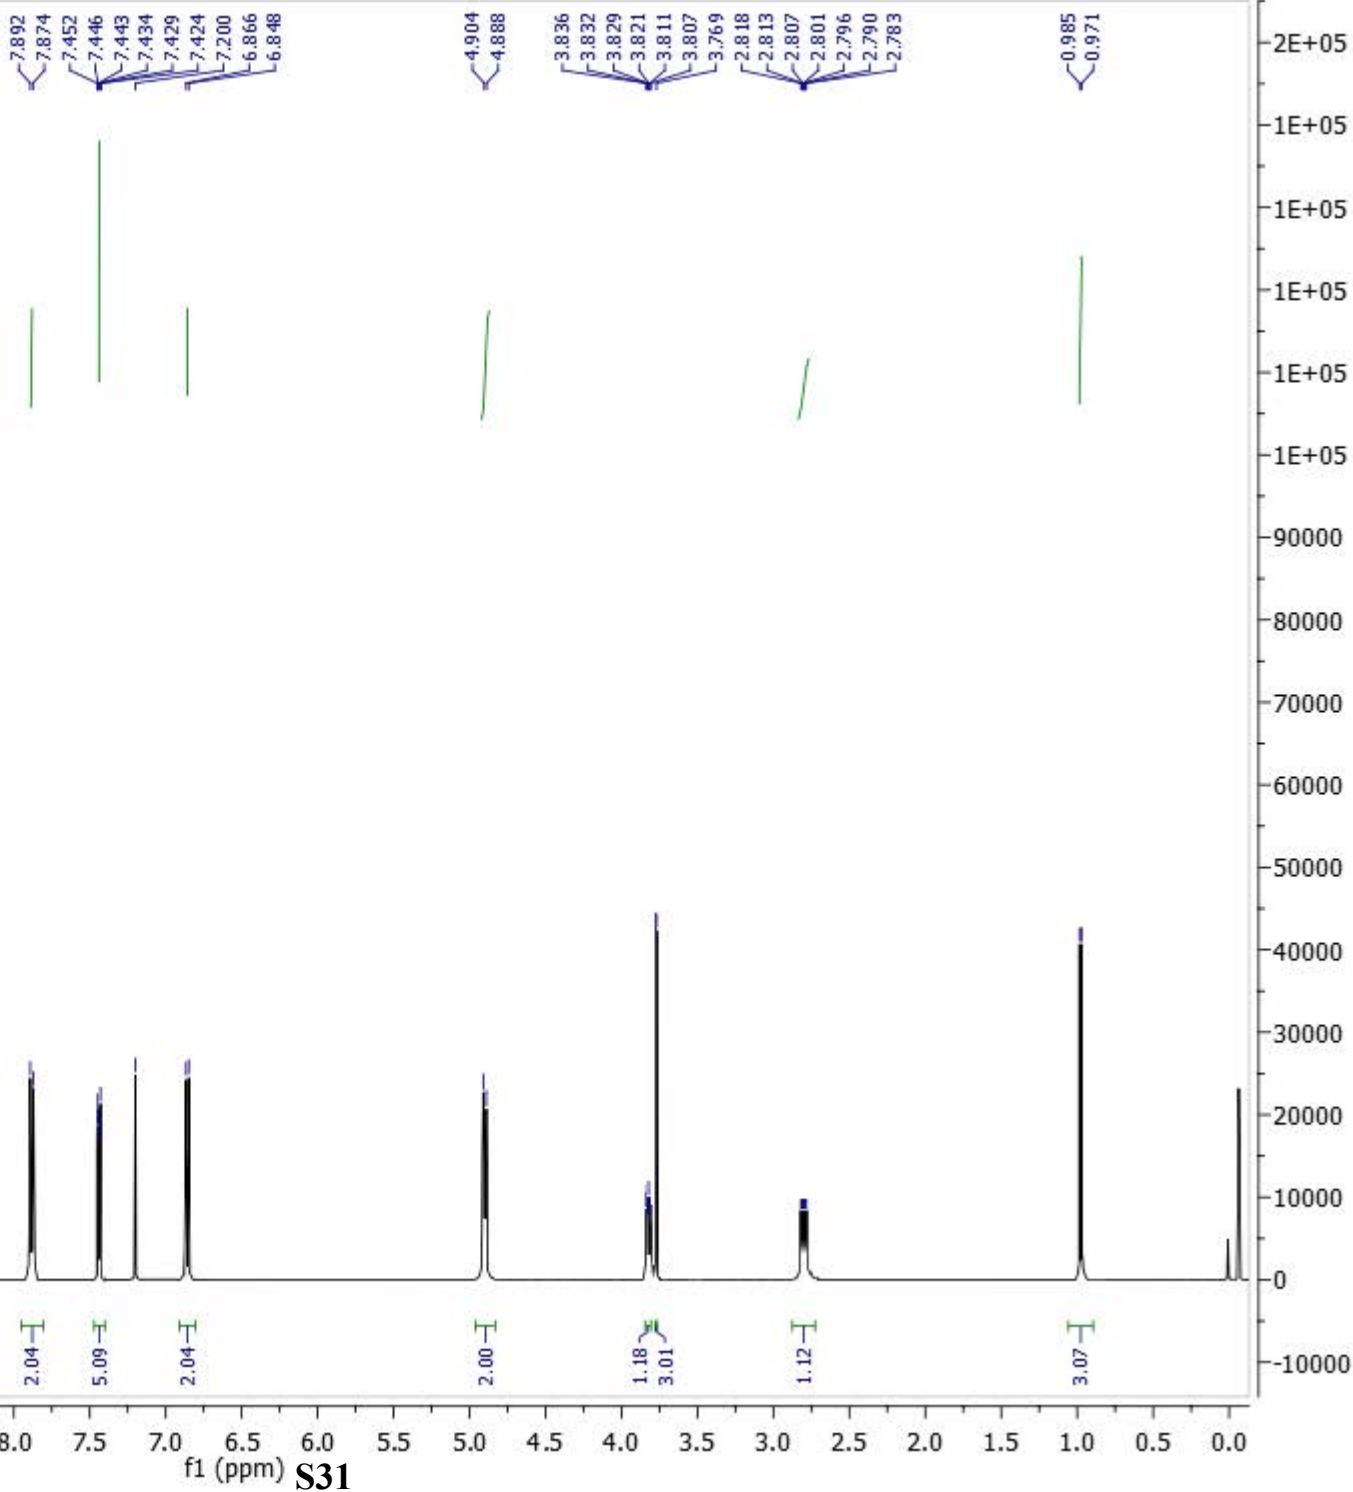

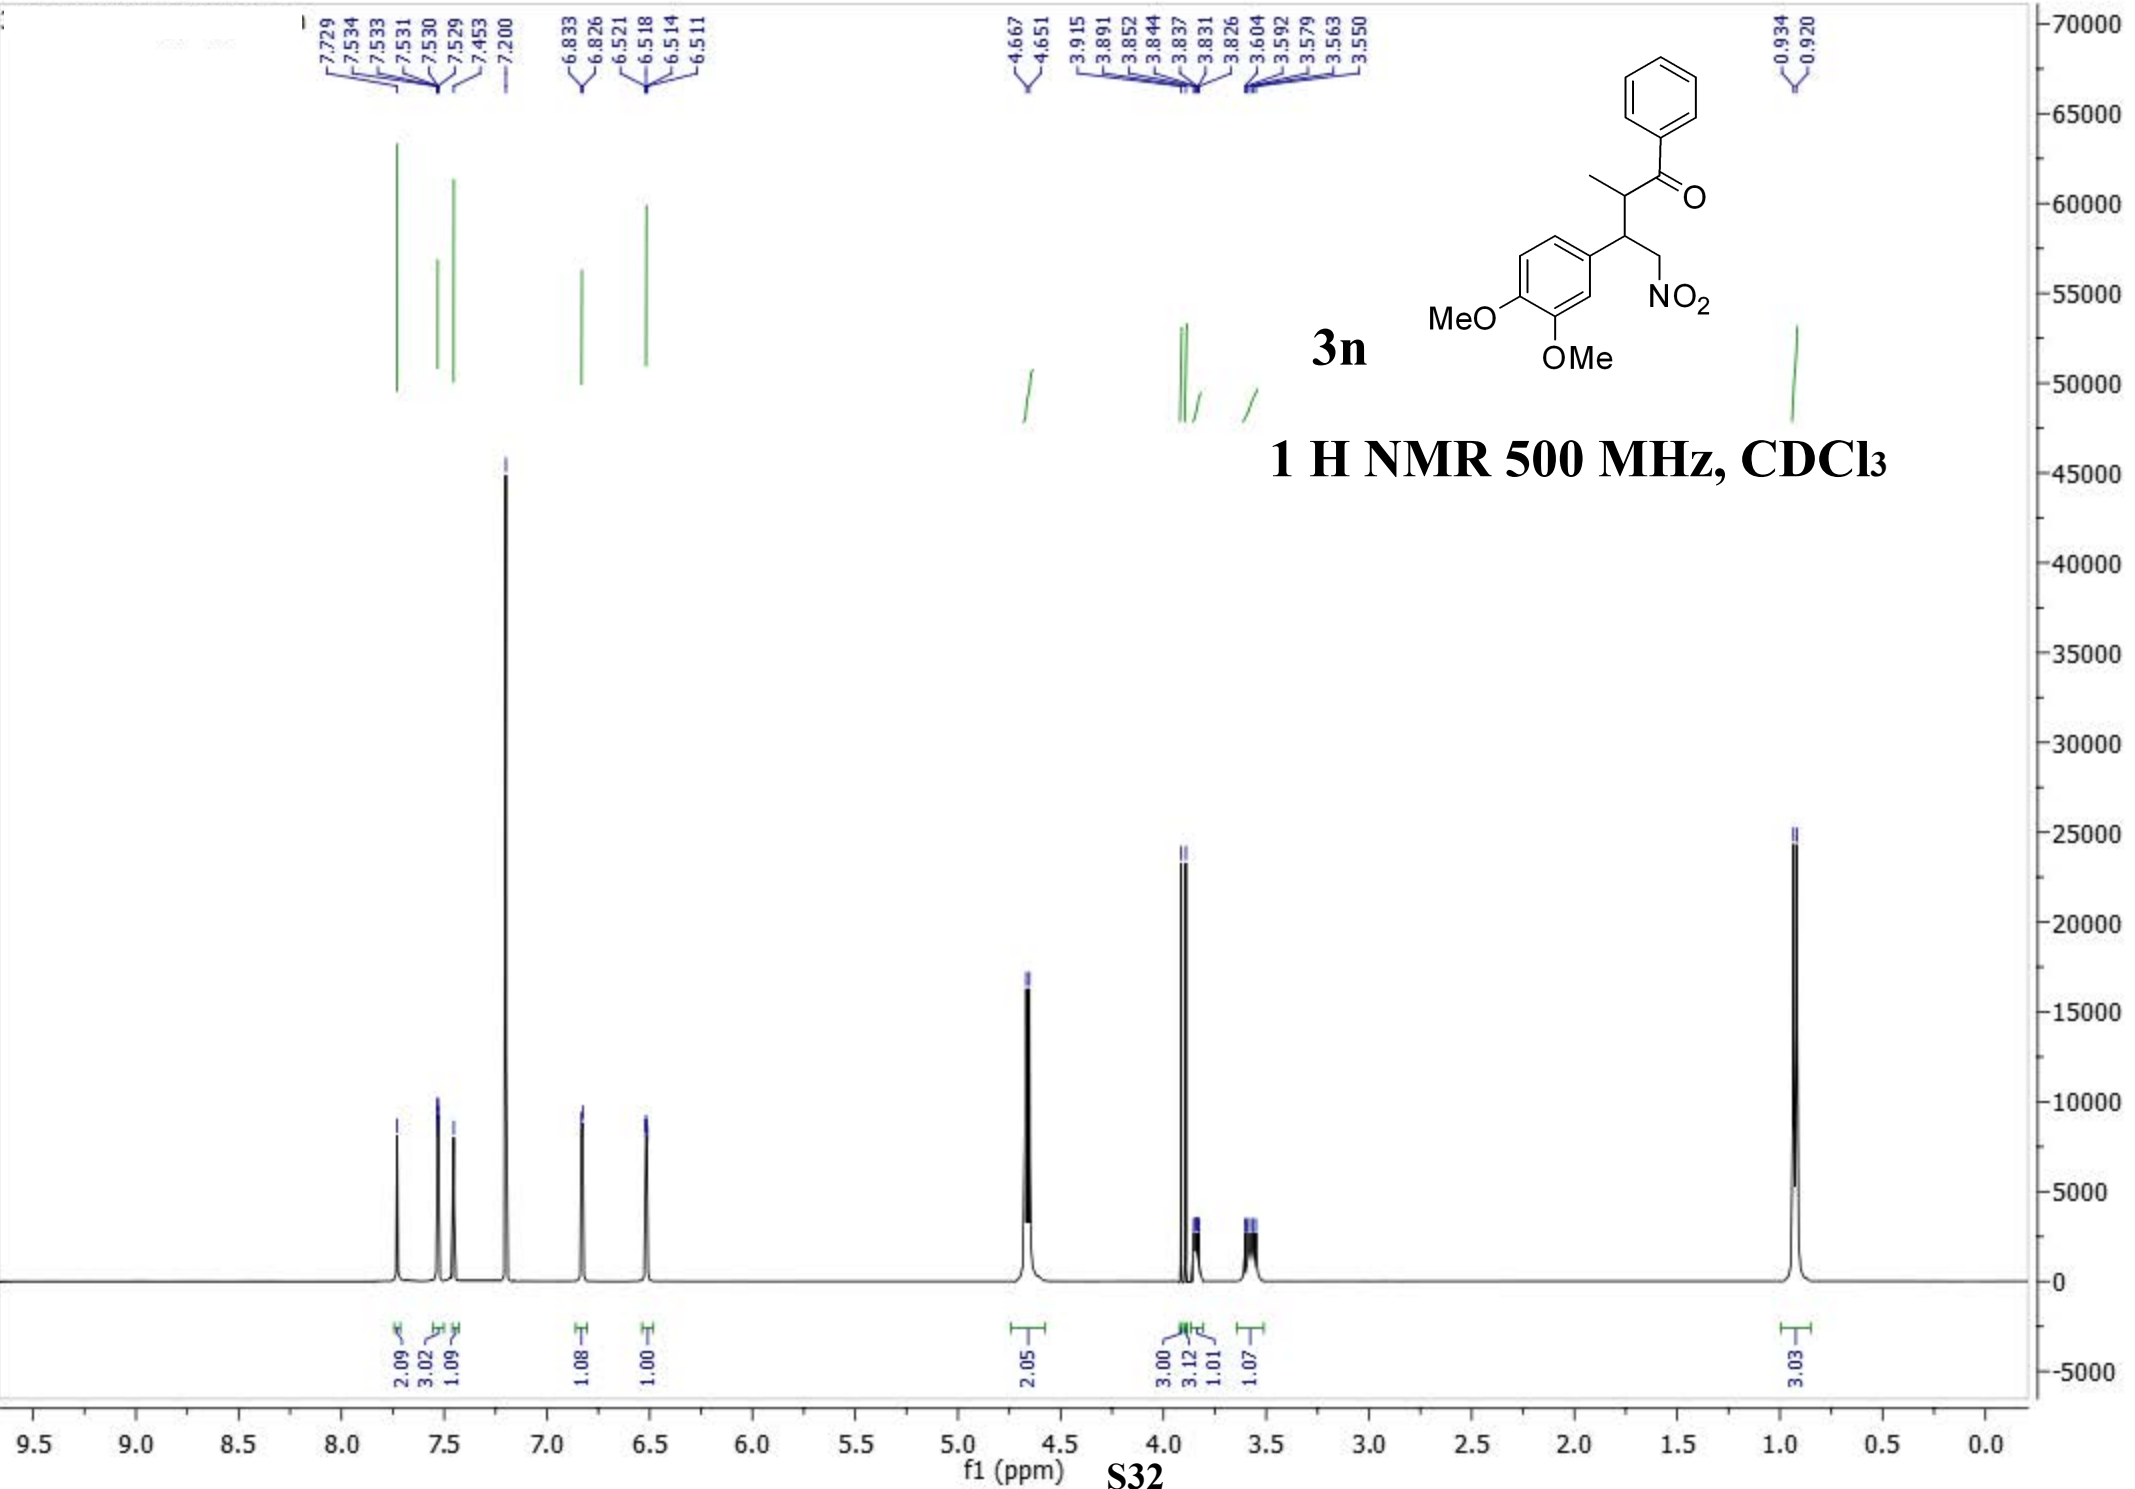



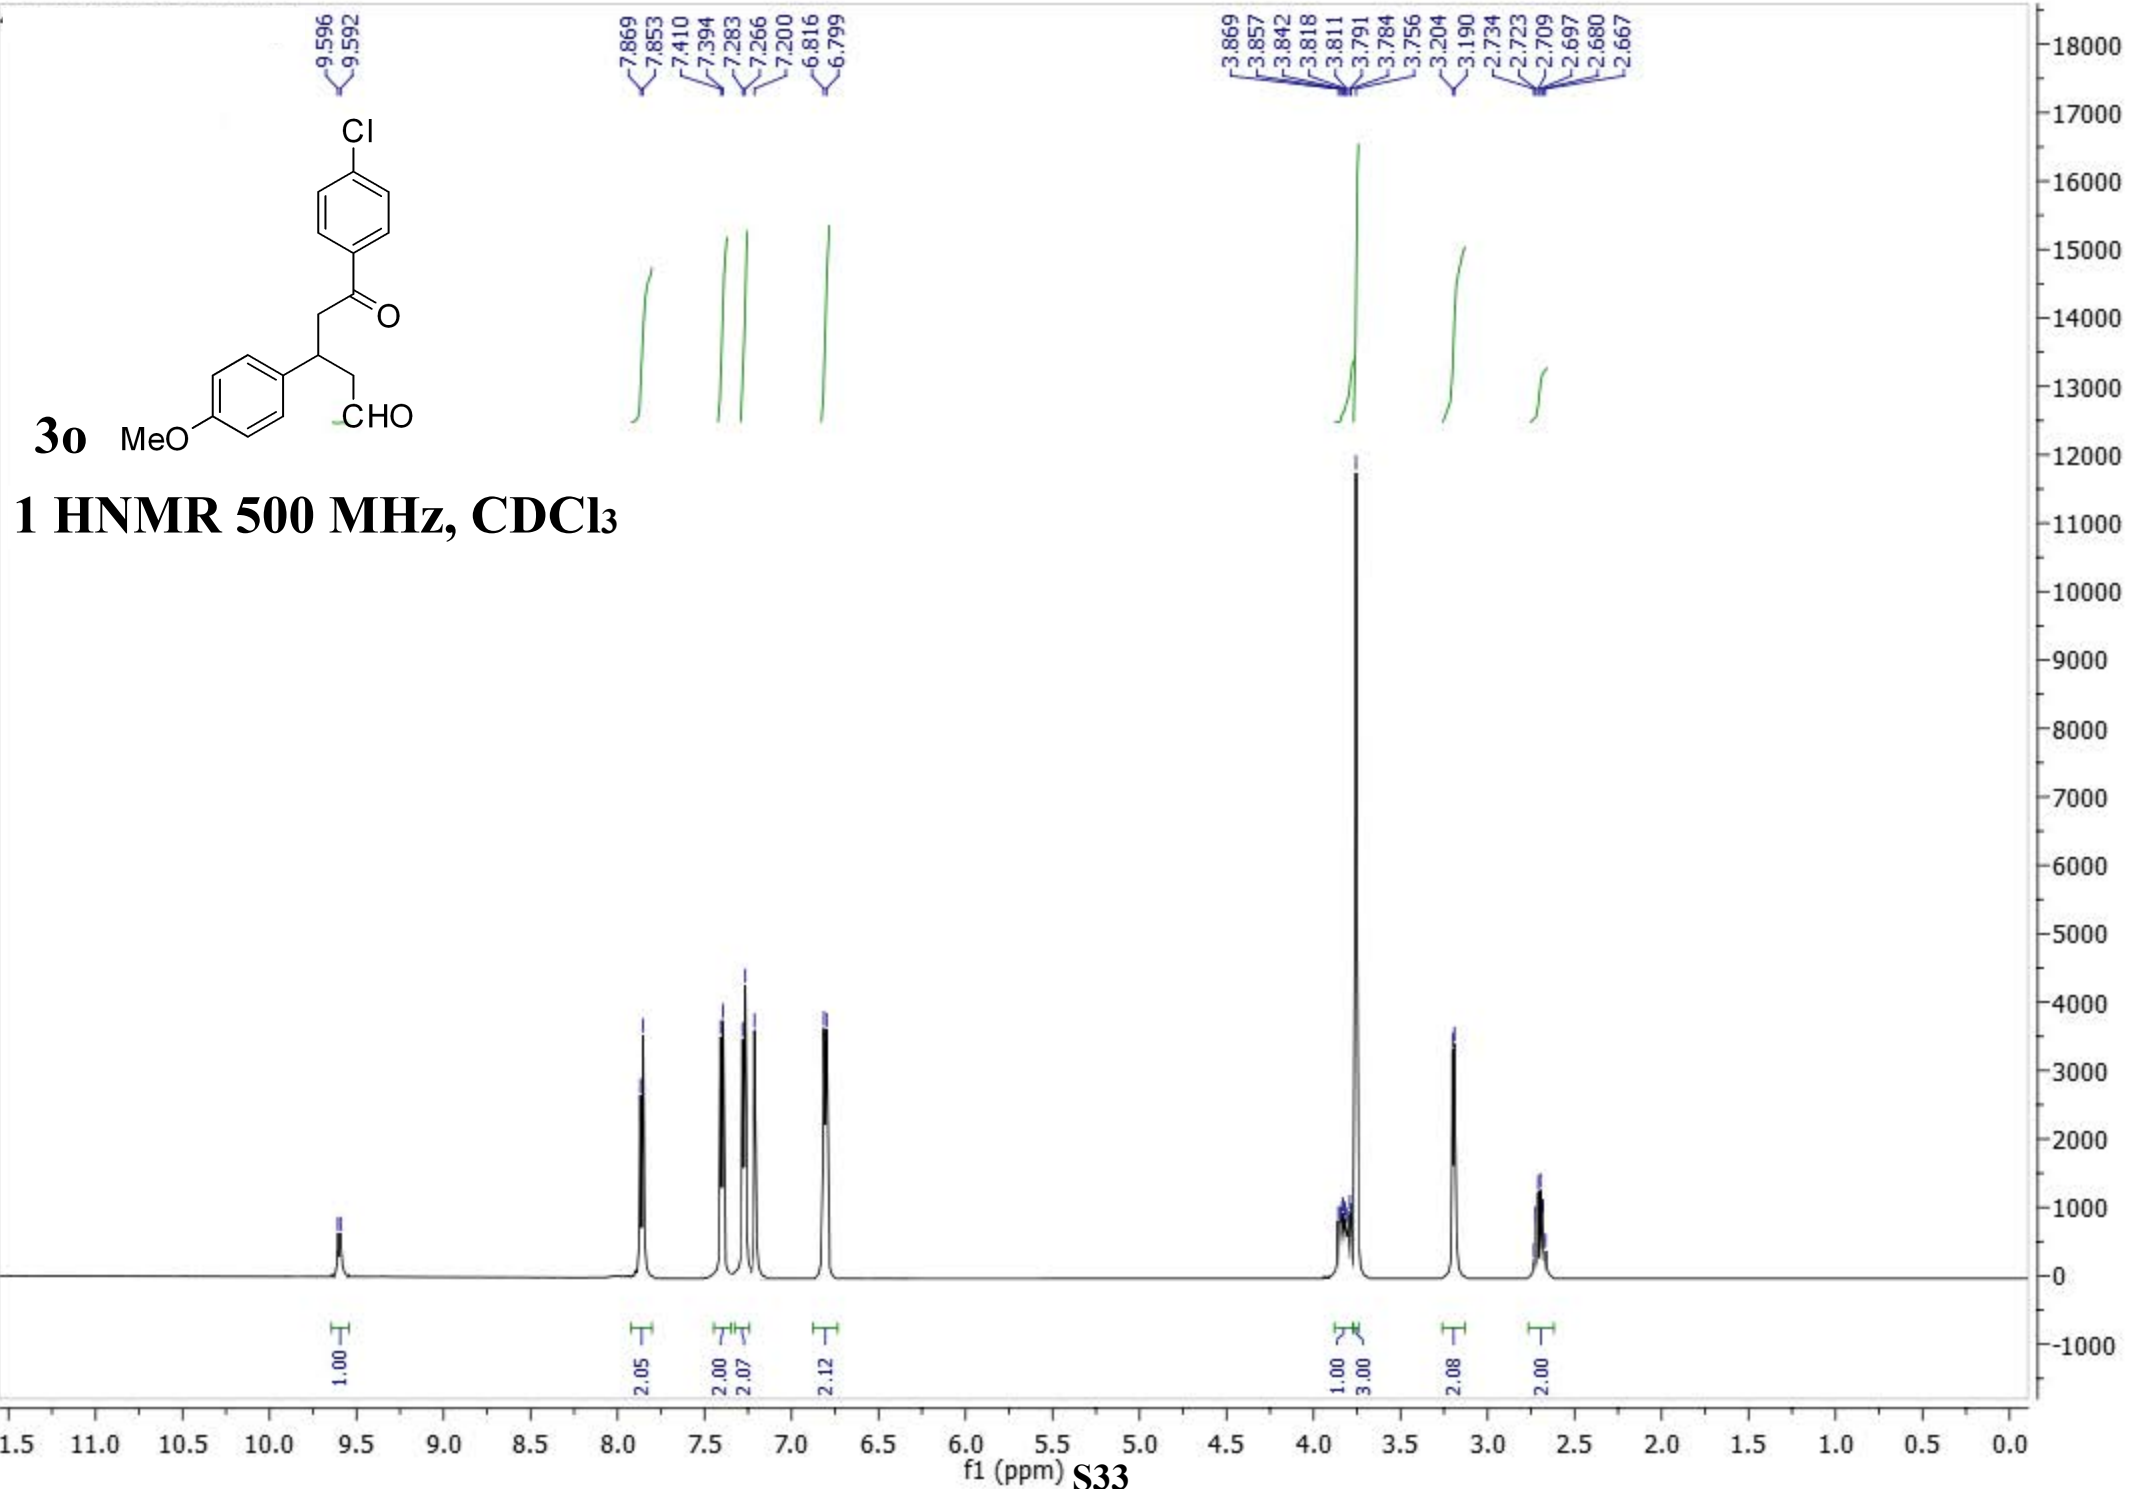

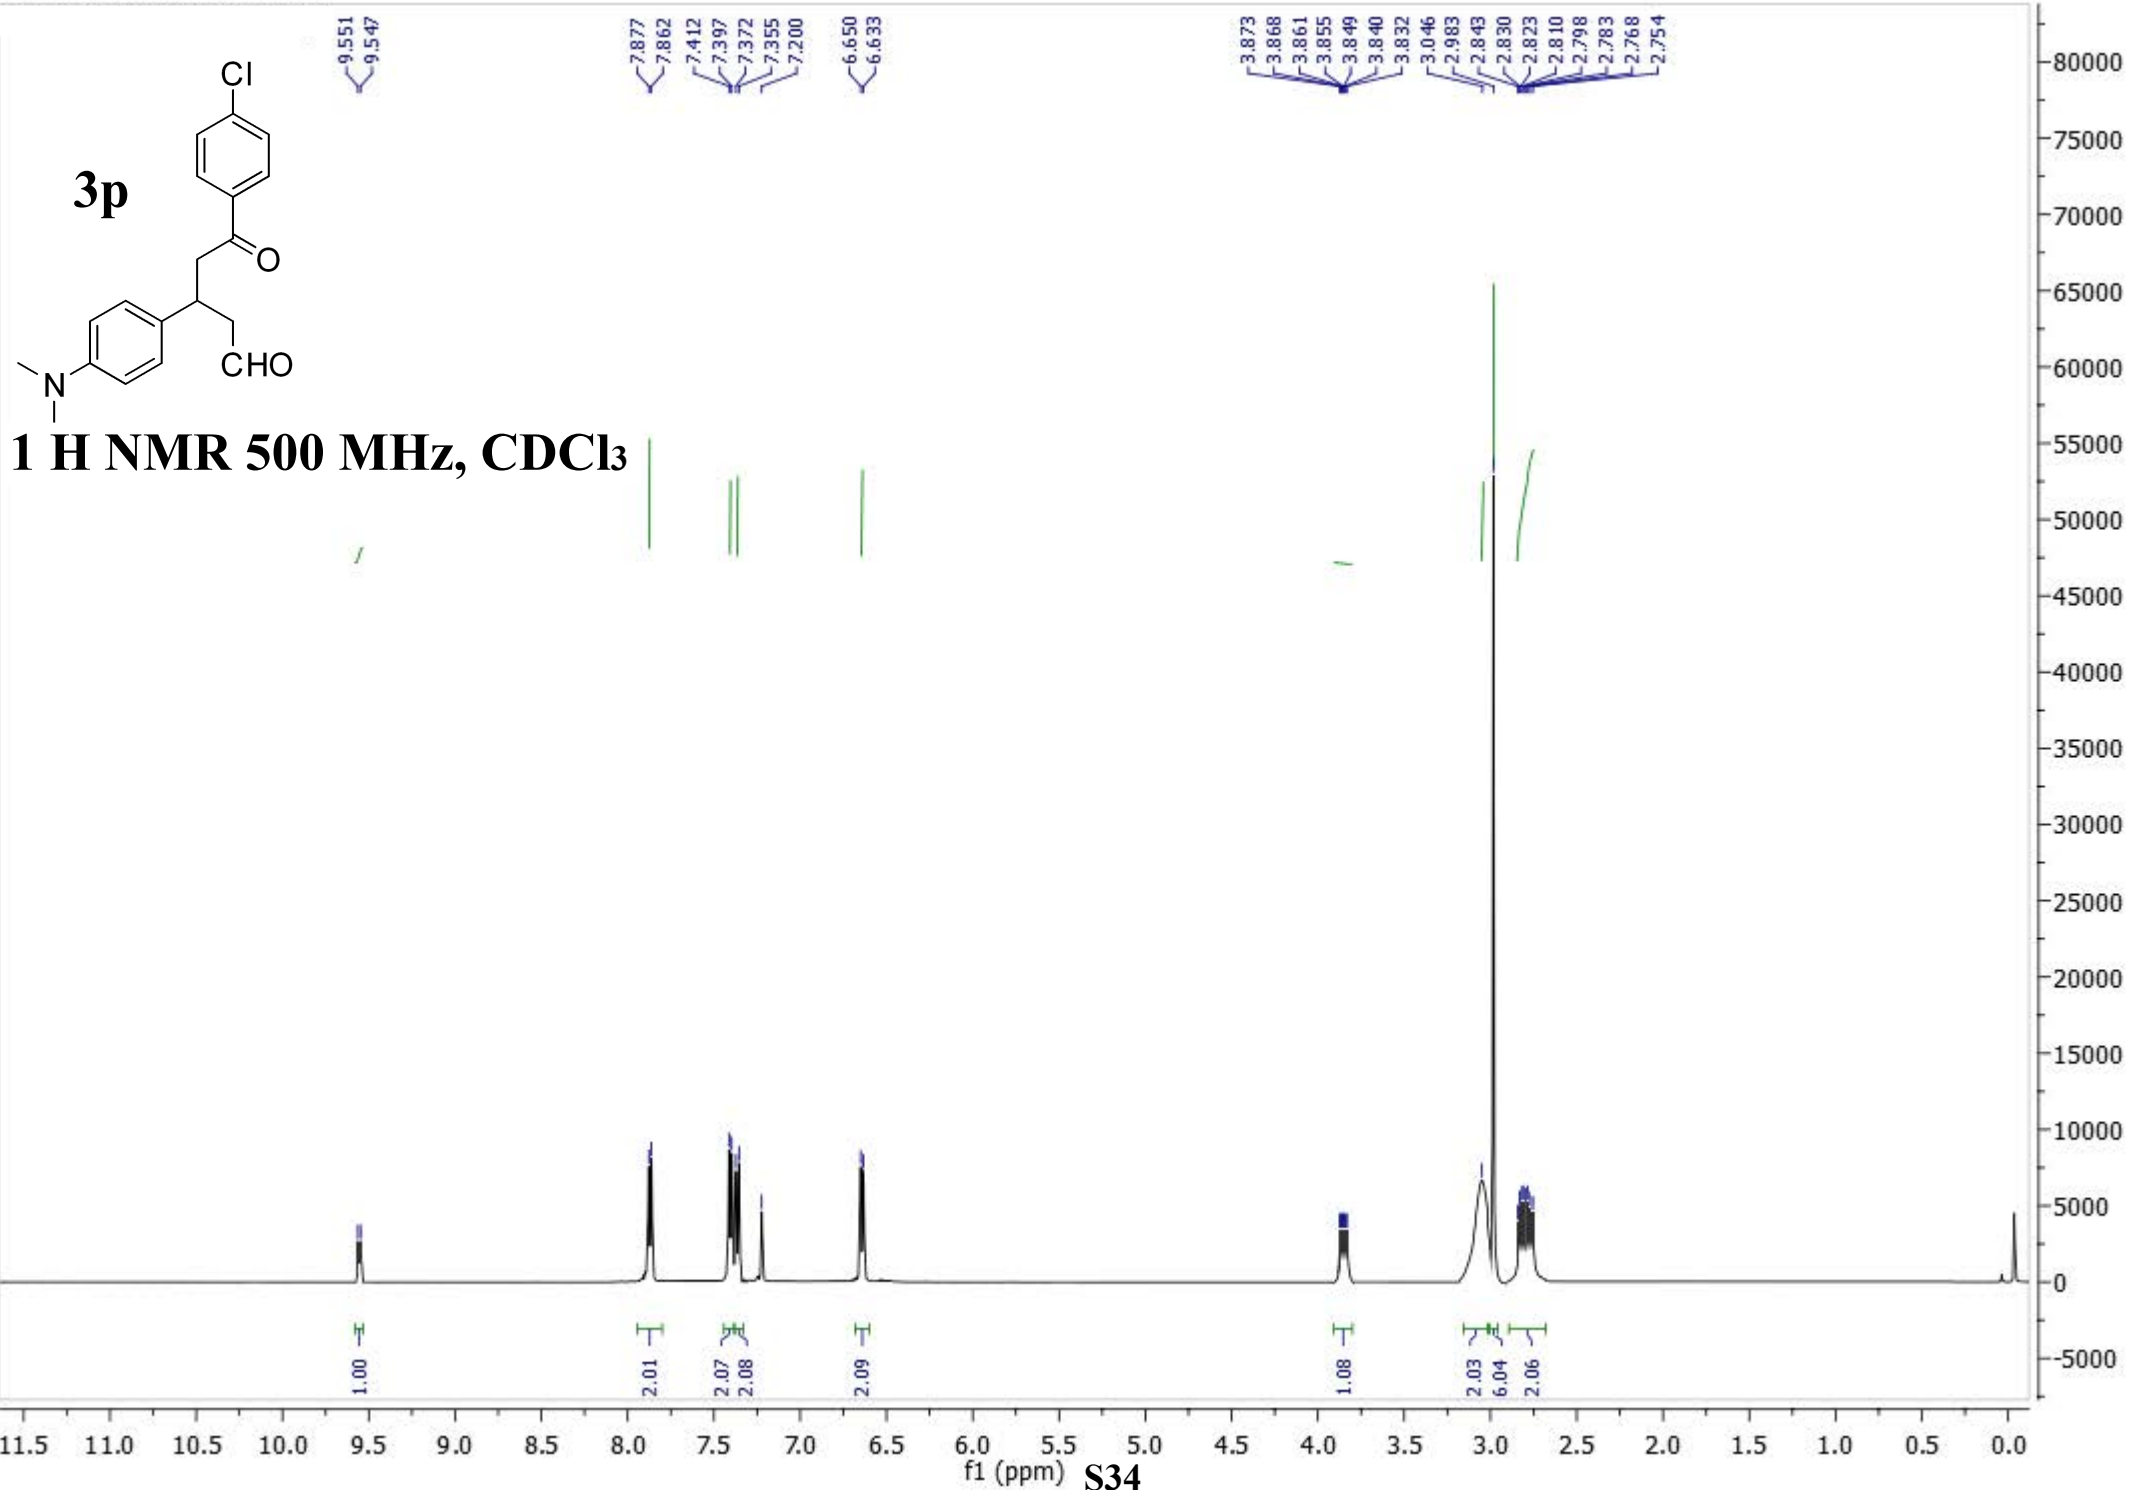

**3q**

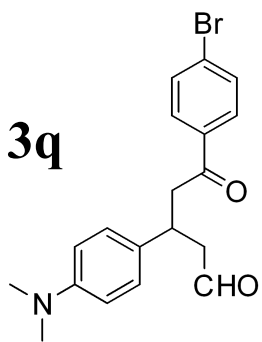

**<sup>1</sup>H NMR 500 MHz, CDCl<sub>3</sub>**

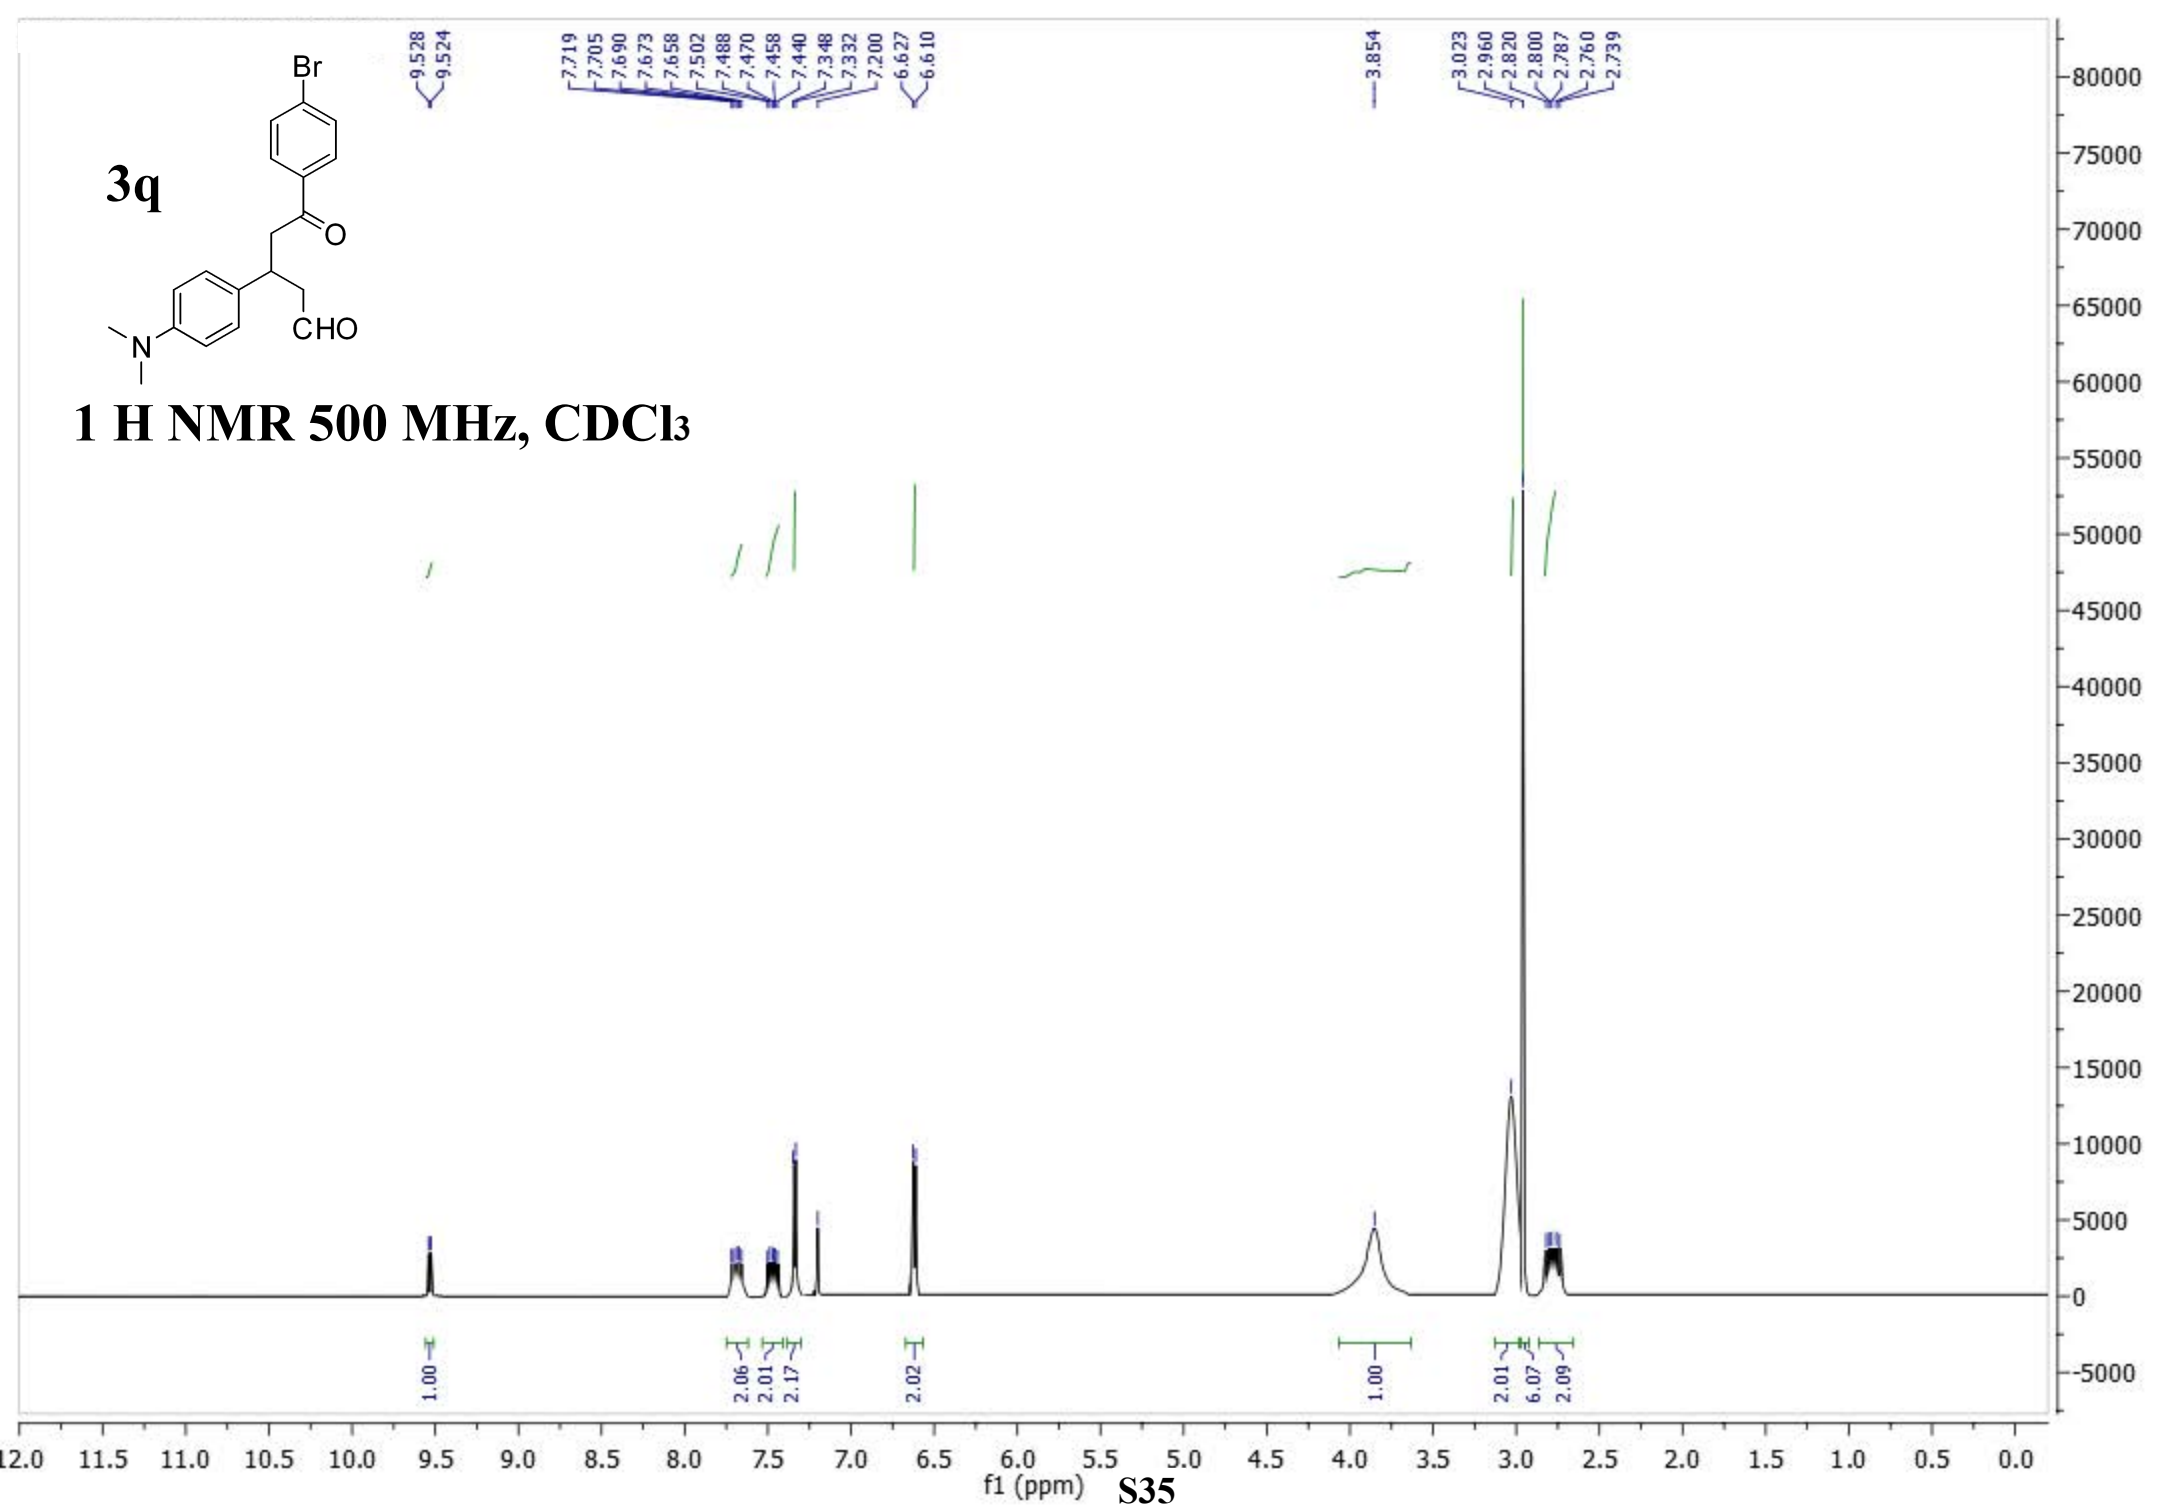

**3r**

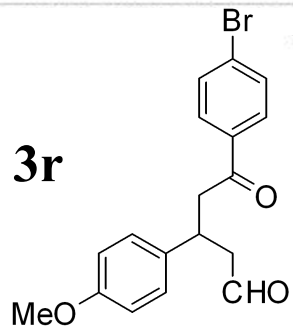

**<sup>1</sup>H NMR 500 MHz, CDCl<sub>3</sub>**

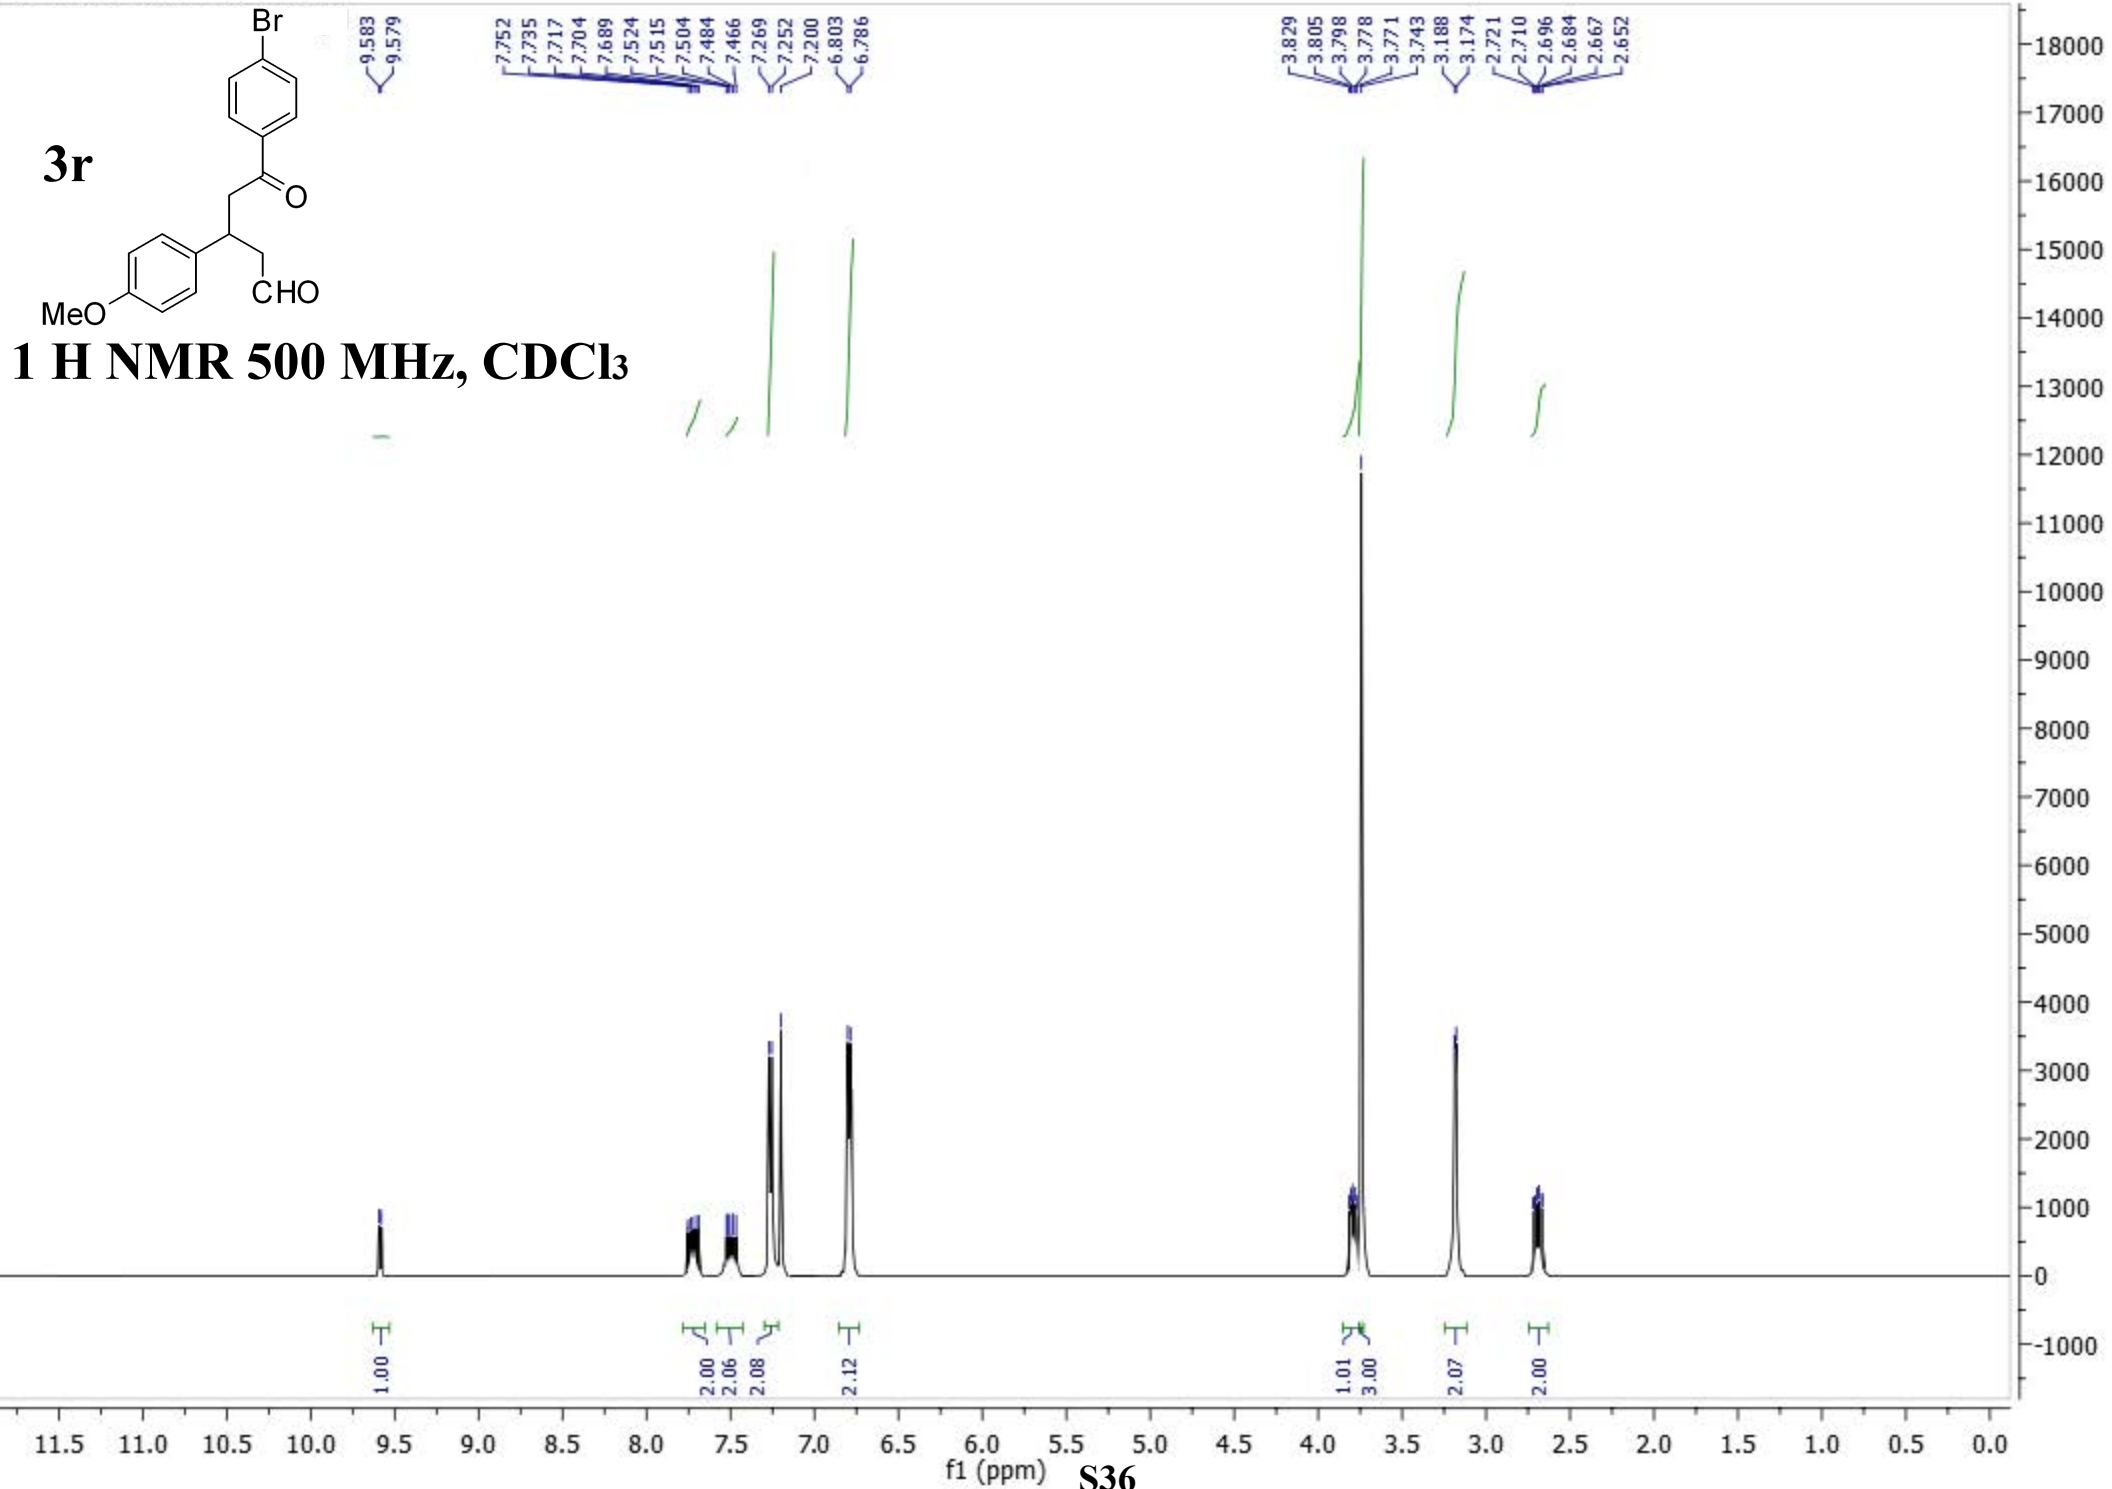

**3s**

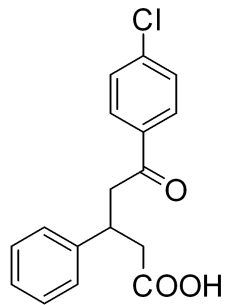

**<sup>1</sup>H NMR 500 MHz, CDCl<sub>3</sub>**

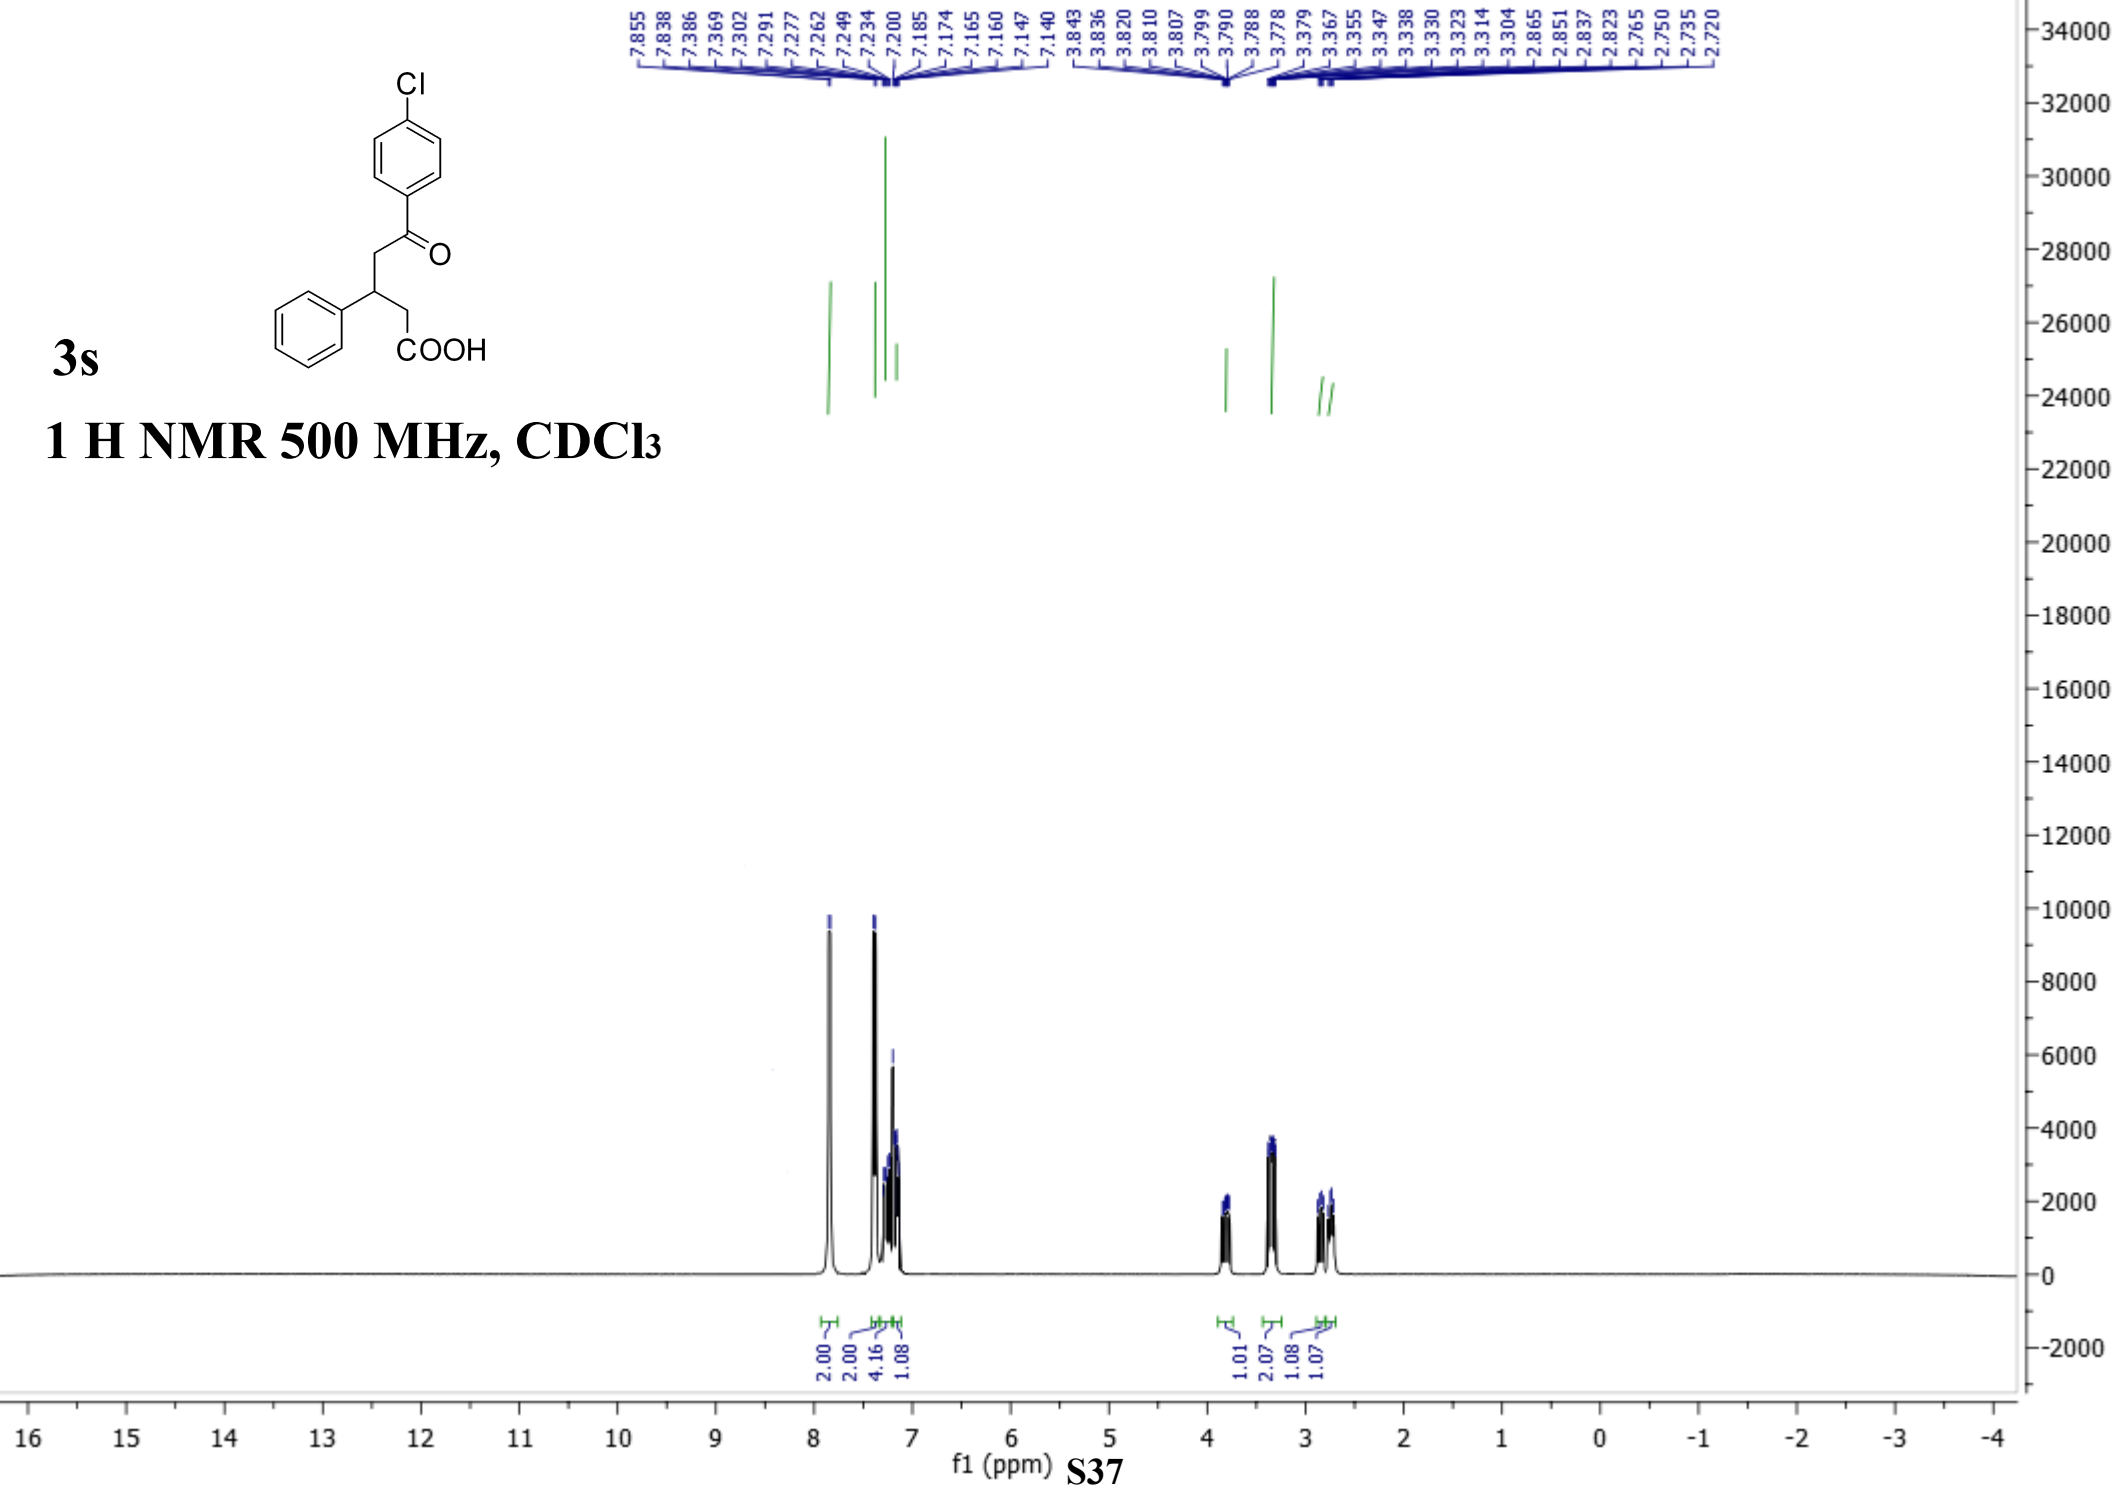

**3t**

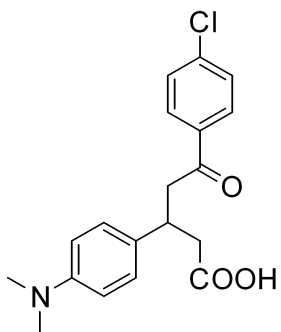

**<sup>1</sup>H NMR 500 MHz, CDCl<sub>3</sub>**

7.895  
7.878  
7.496  
7.479  
7.423  
7.406  
7.200  
6.644  
6.627

3.424  
3.409  
3.388  
3.374  
3.362  
3.068  
3.056  
3.039  
3.025  
3.011  
2.994  
2.149  
2.135  
2.121  
2.108  
2.094

2.16  
2.10  
2.09  
2.00

1.00  
2.08  
6.06  
2.06

11.0 10.5 10.0 9.5 9.0 8.5 8.0 7.5 7.0 6.0 5.5 5.0 4.5 4.0 3.5 3.0 2.5 2.0 1.5 1.0 0.5 0.0

f1 (ppm) S38

12000  
11000  
10000  
9000  
8000  
7000  
6000  
5000  
4000  
3000  
2000  
1000  
0  
-1000

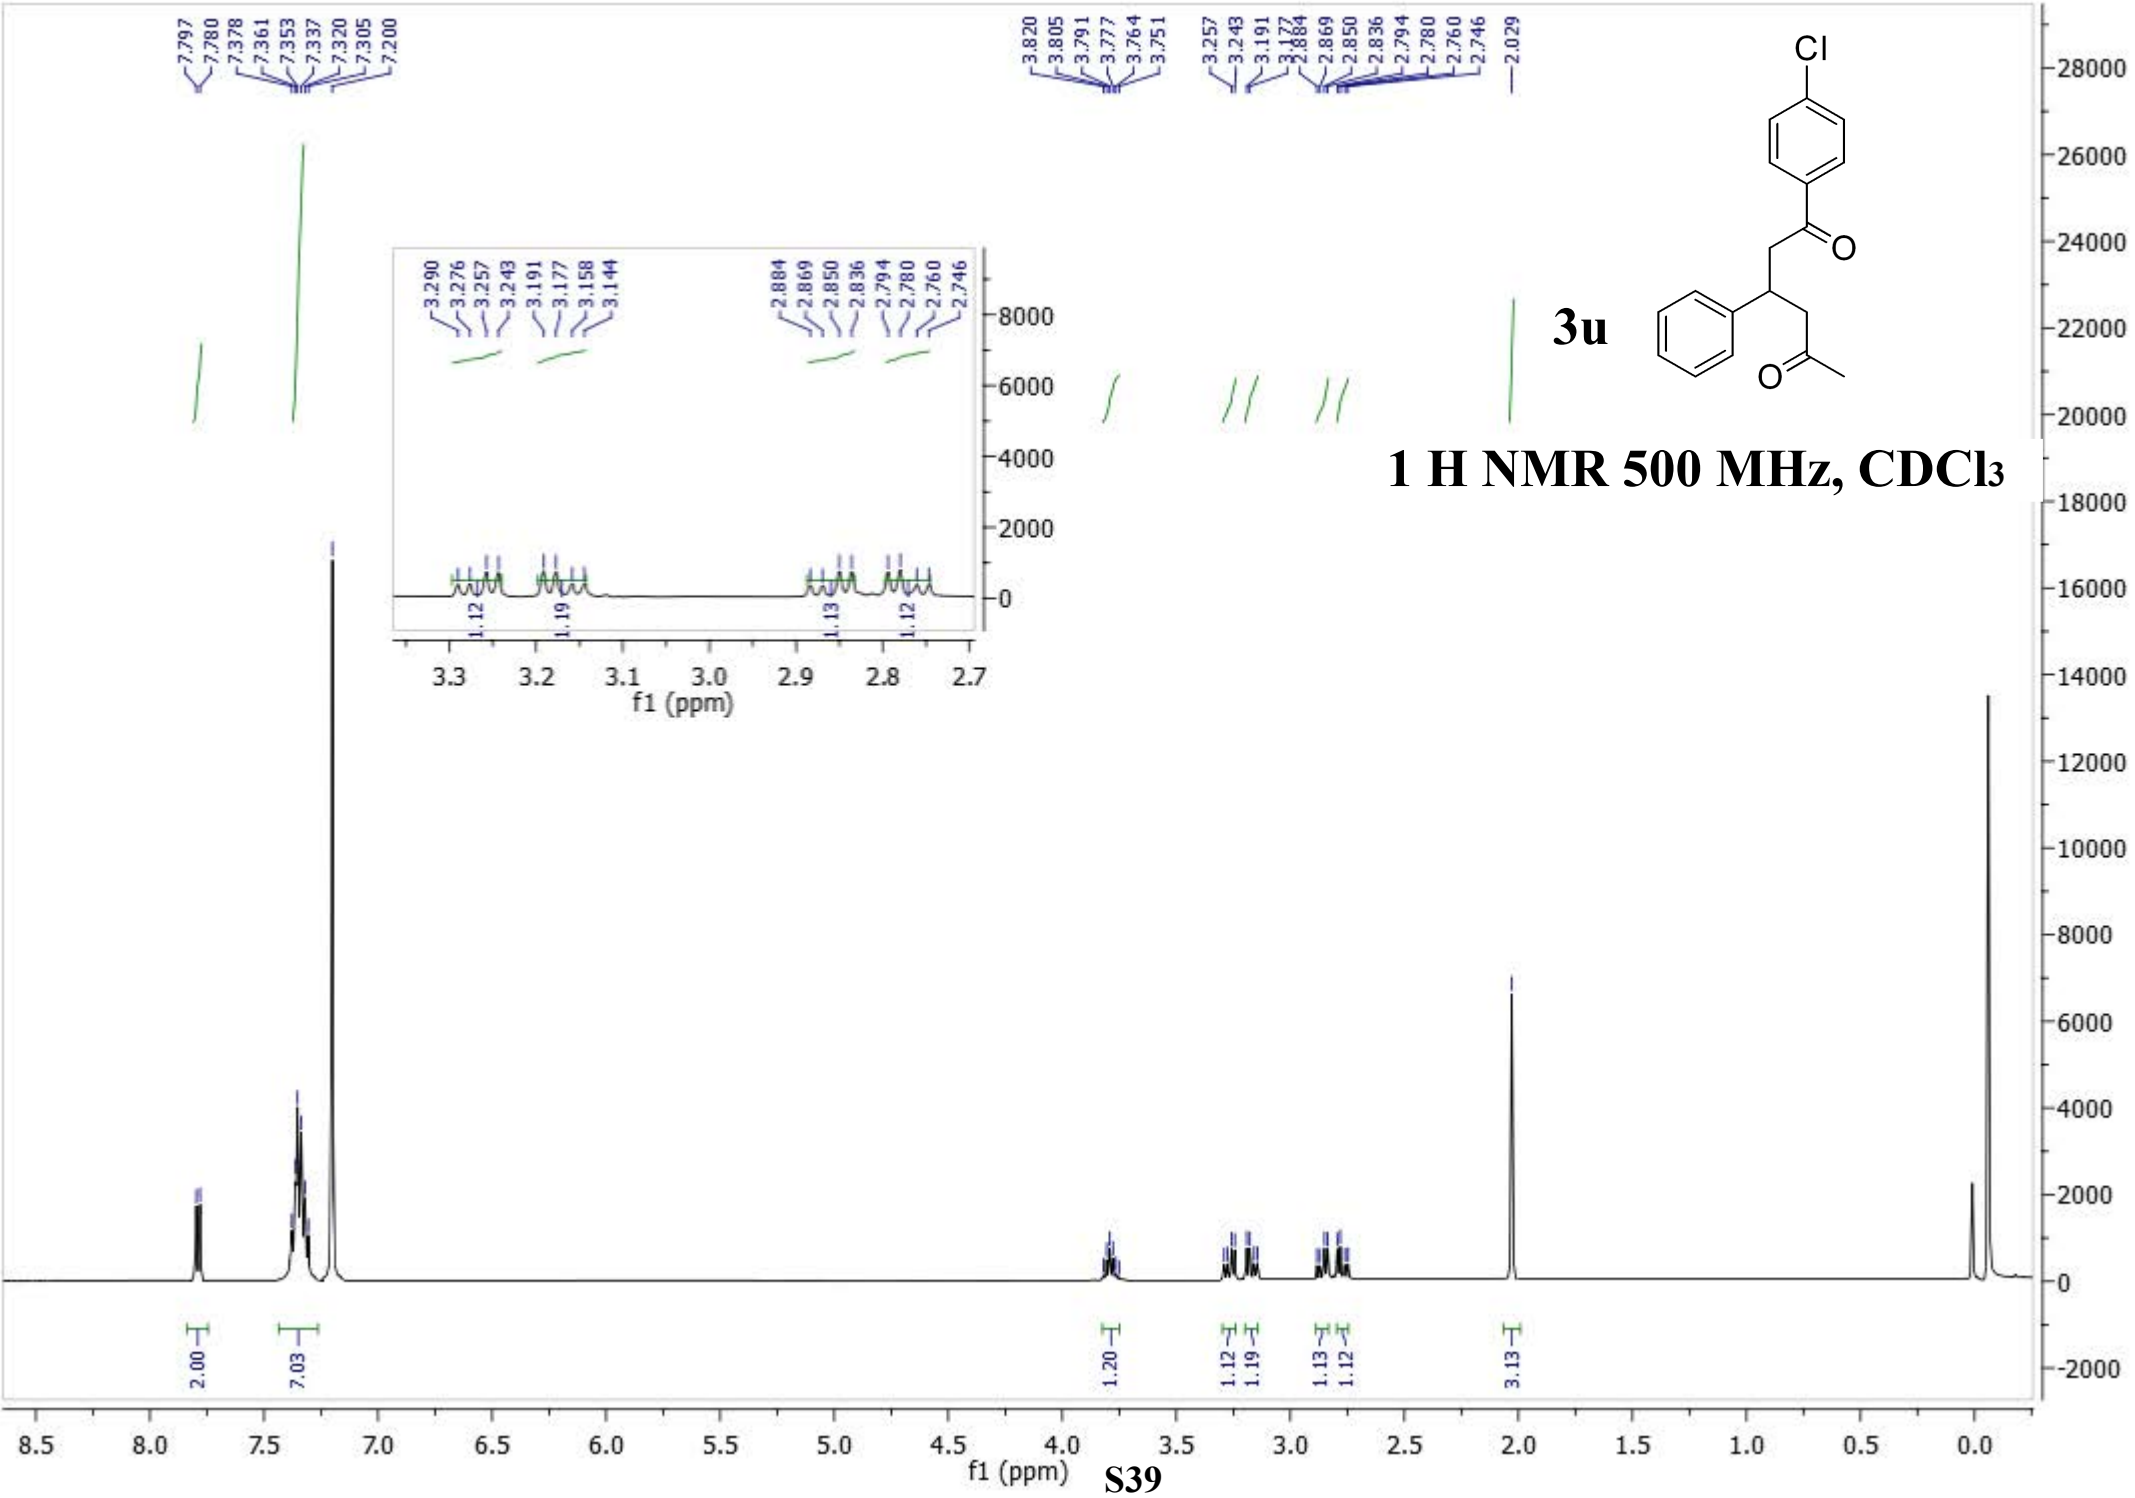

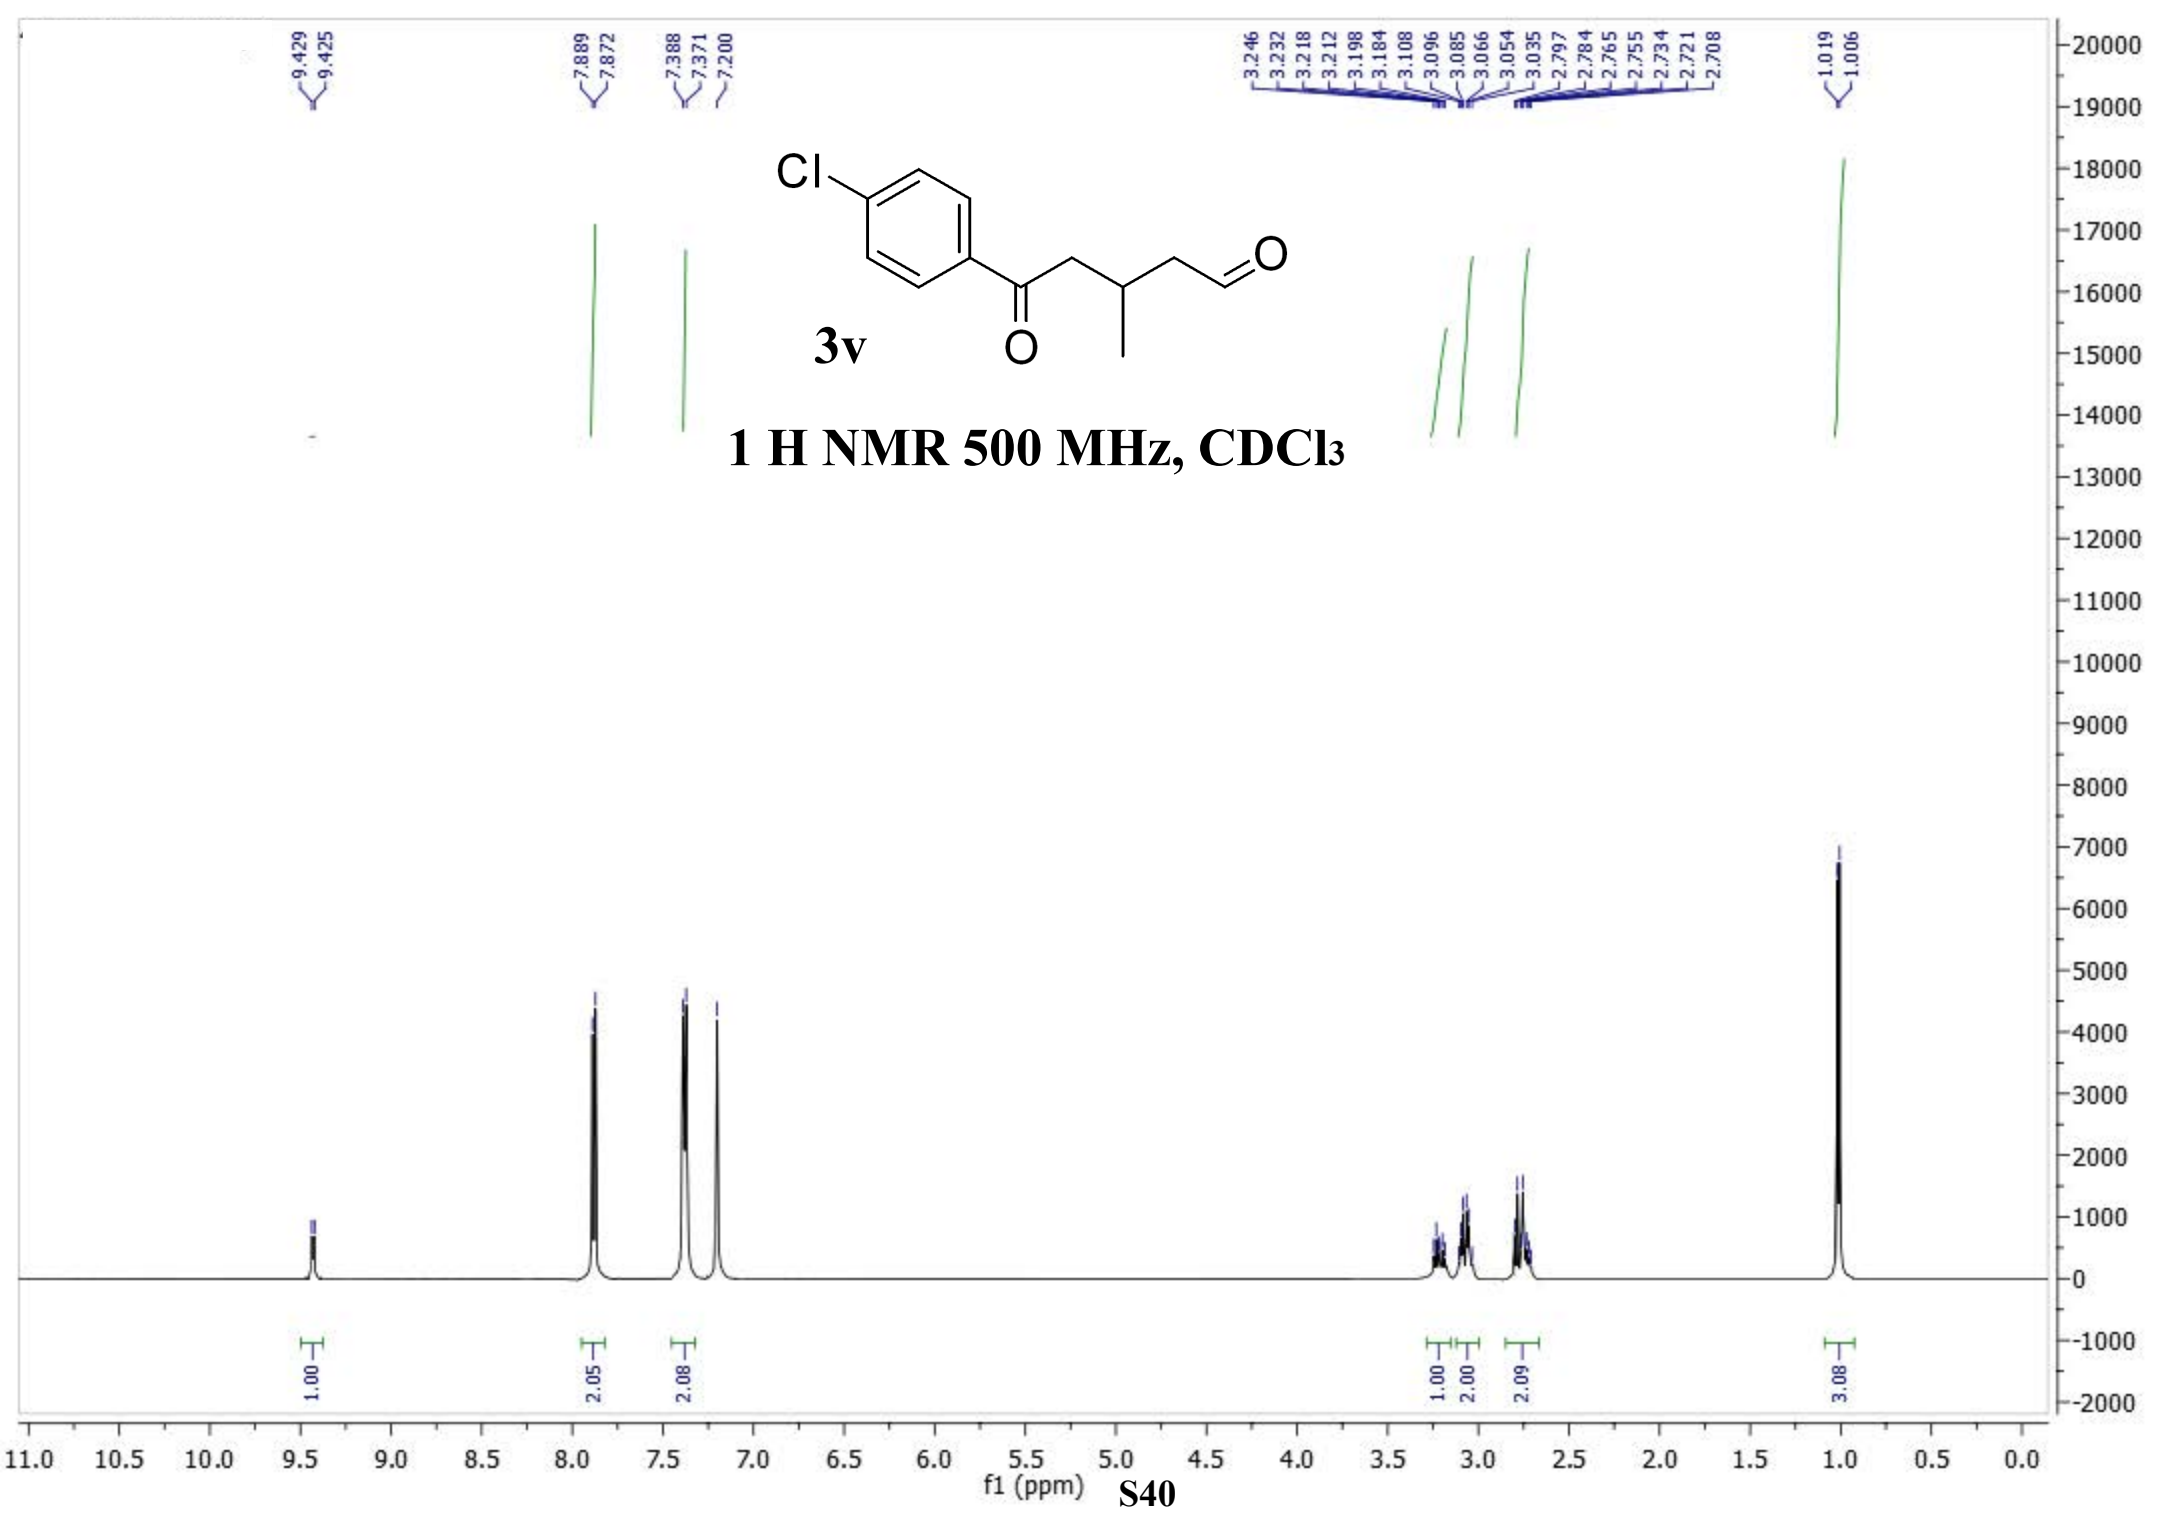



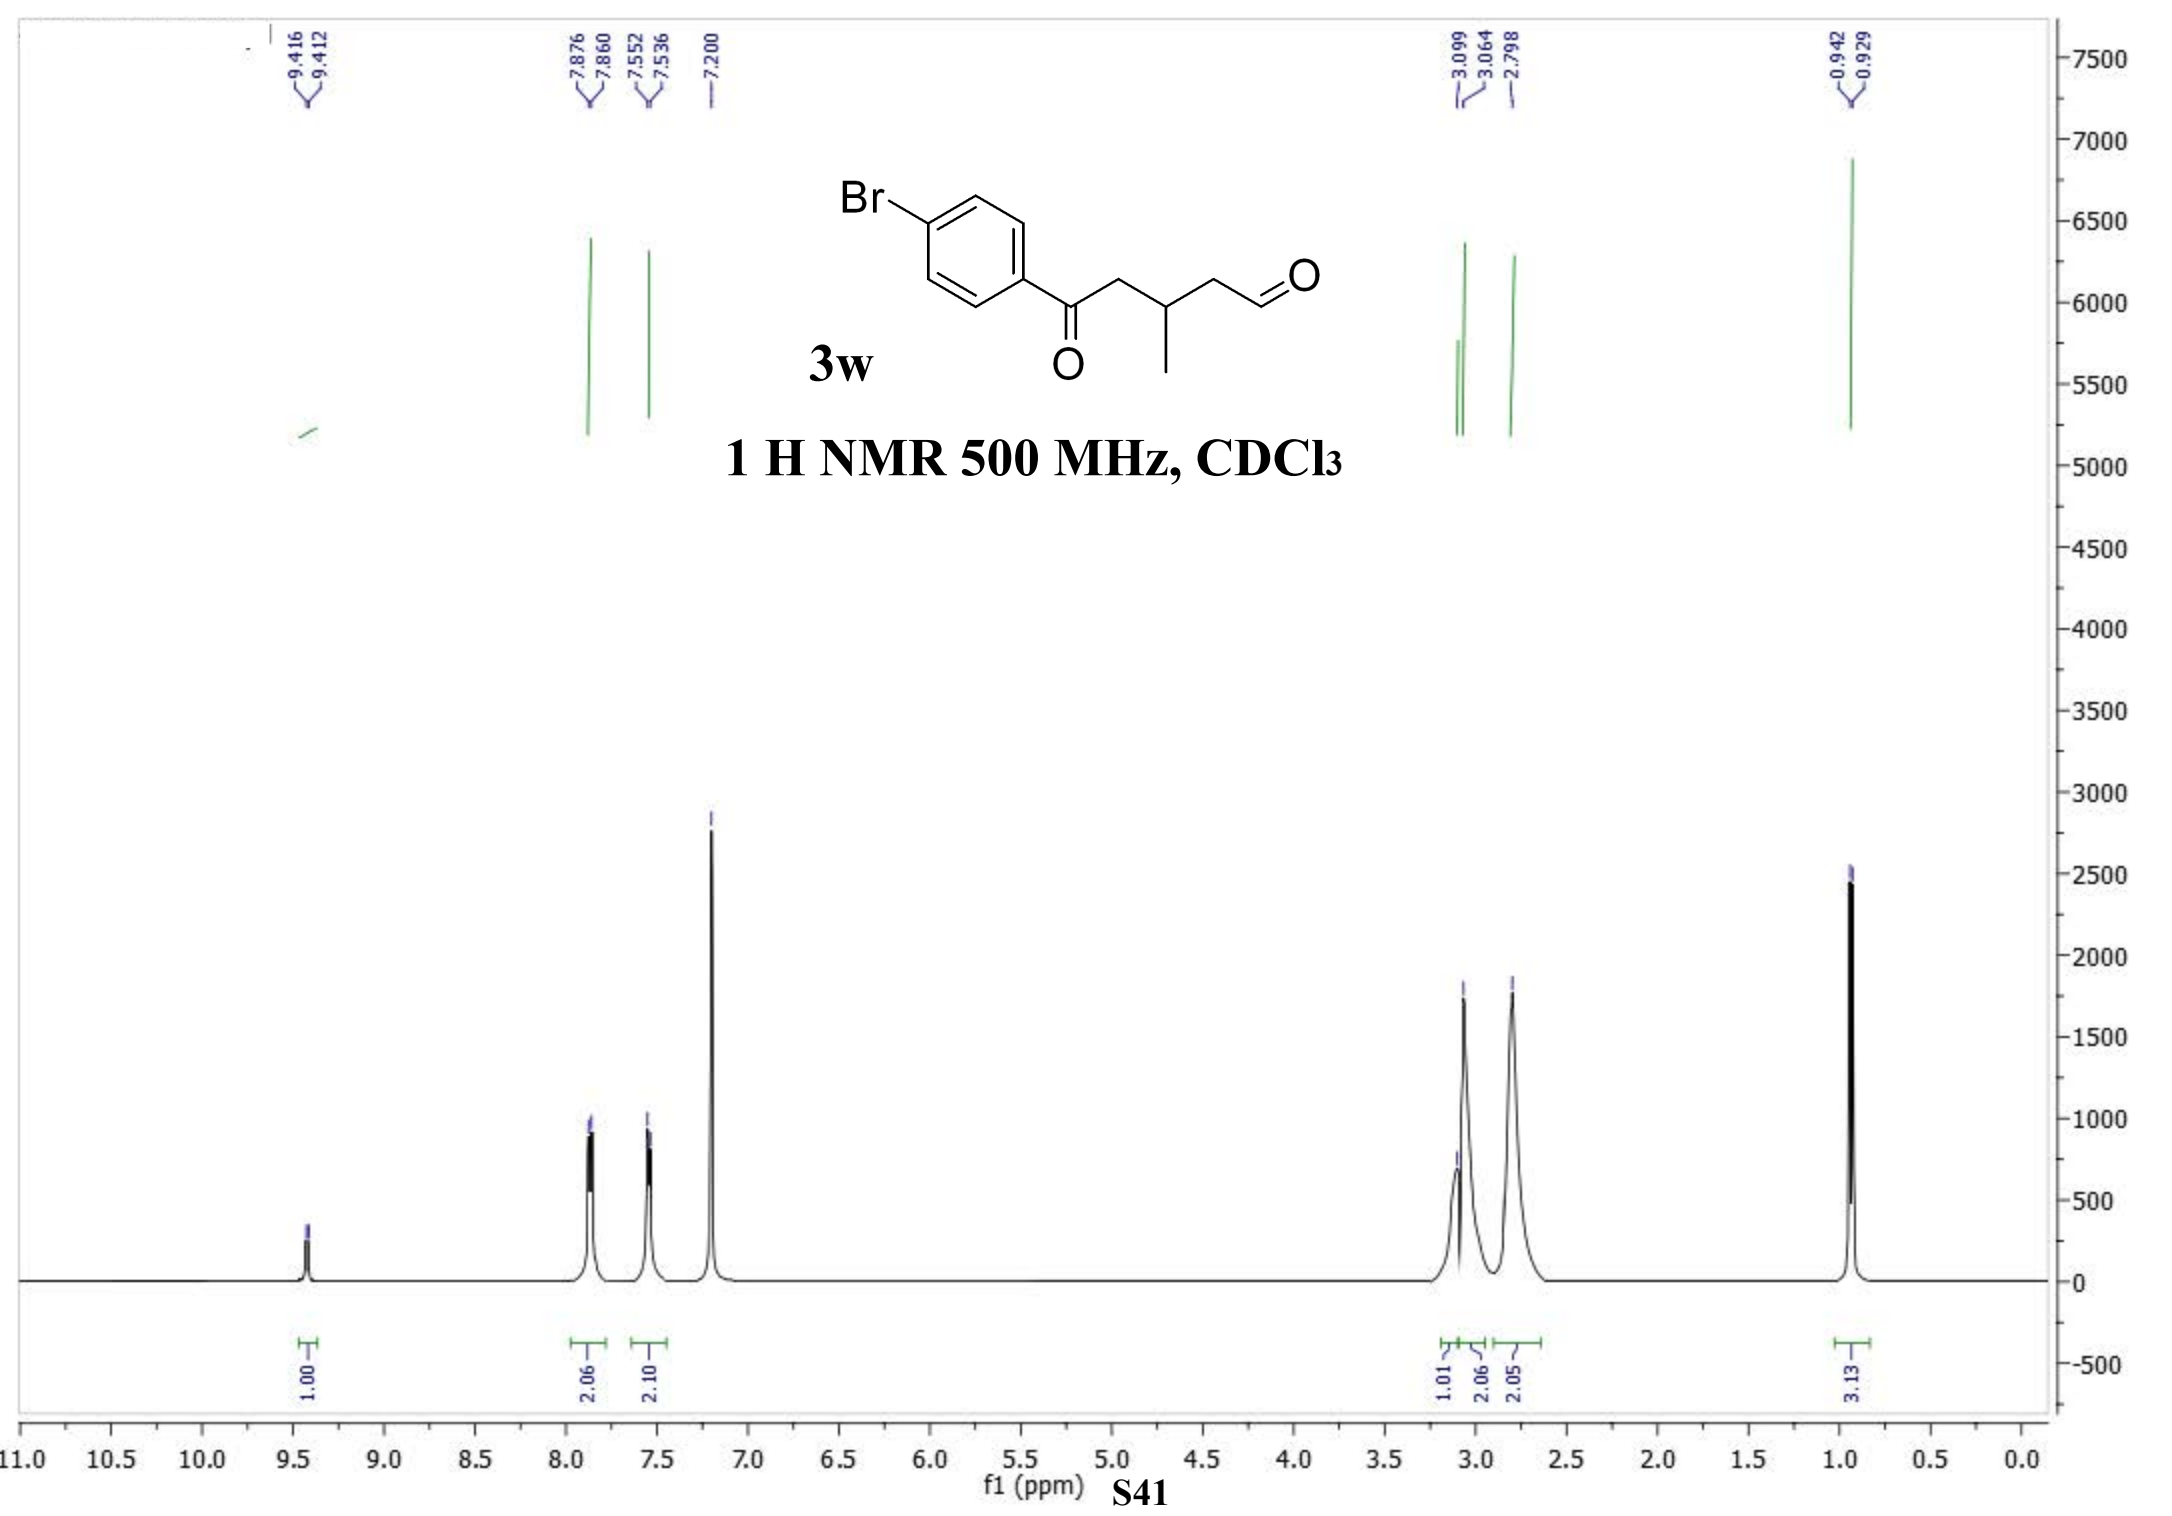

# V. 13 C NMR Spectra 3a -3w

3a

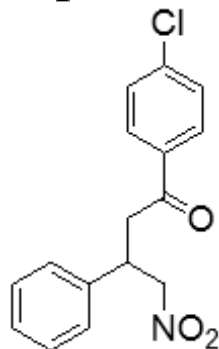

13 C NMR 125 MHz, CDCl<sub>3</sub>

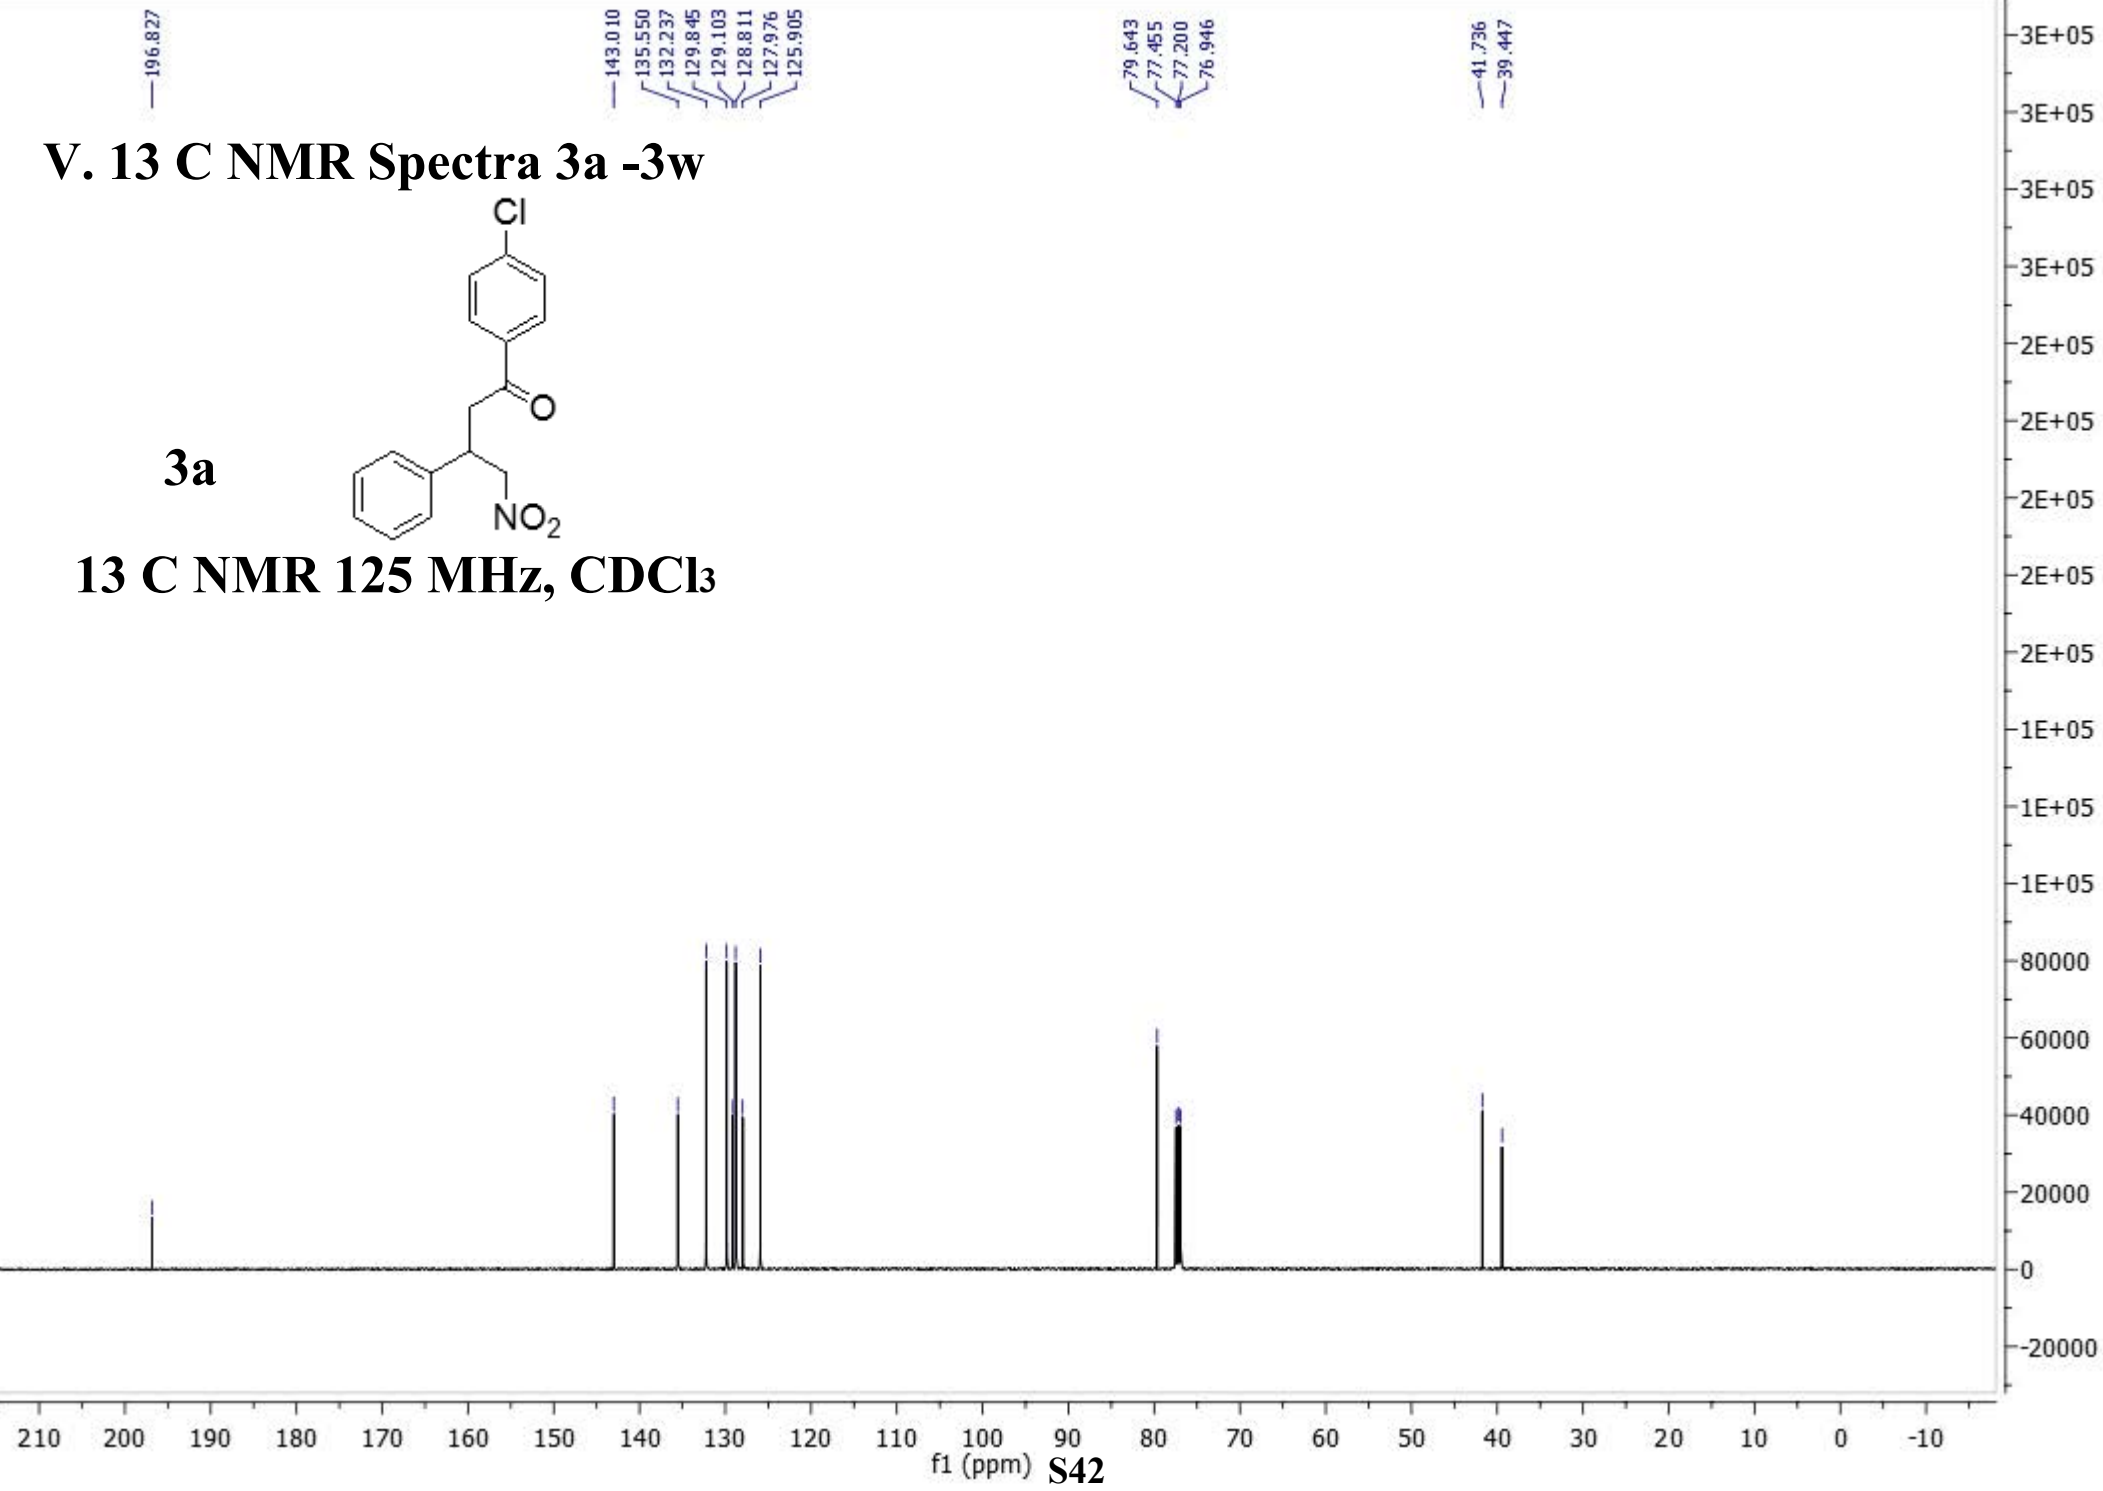

**3b**  
**13 C NMR 125 MHz, CDCl<sub>3</sub>**

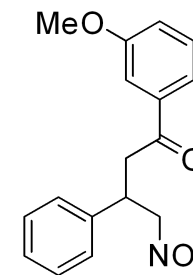

196.718  
159.941  
139.223  
137.825  
129.750  
129.157  
127.933  
127.686  
120.624  
120.020  
112.317  
79.606  
77.454  
77.200  
76.946  
55.507  
41.713  
39.468

210 200 190 180 170 160 150 140 130 120 110 100 90 80 70 60 50 40 30 20 10 0 -10

f1 (ppm) S43

1E+05  
1E+05  
1E+05  
1E+05  
90000  
80000  
70000  
60000  
50000  
40000  
30000  
20000  
10000  
0  
-10000

**3c**

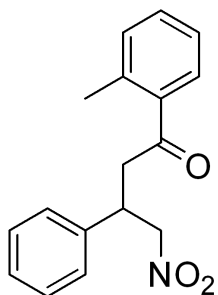

**$^{13}\text{C}$  NMR 125 MHz,  $\text{CDCl}_3$**

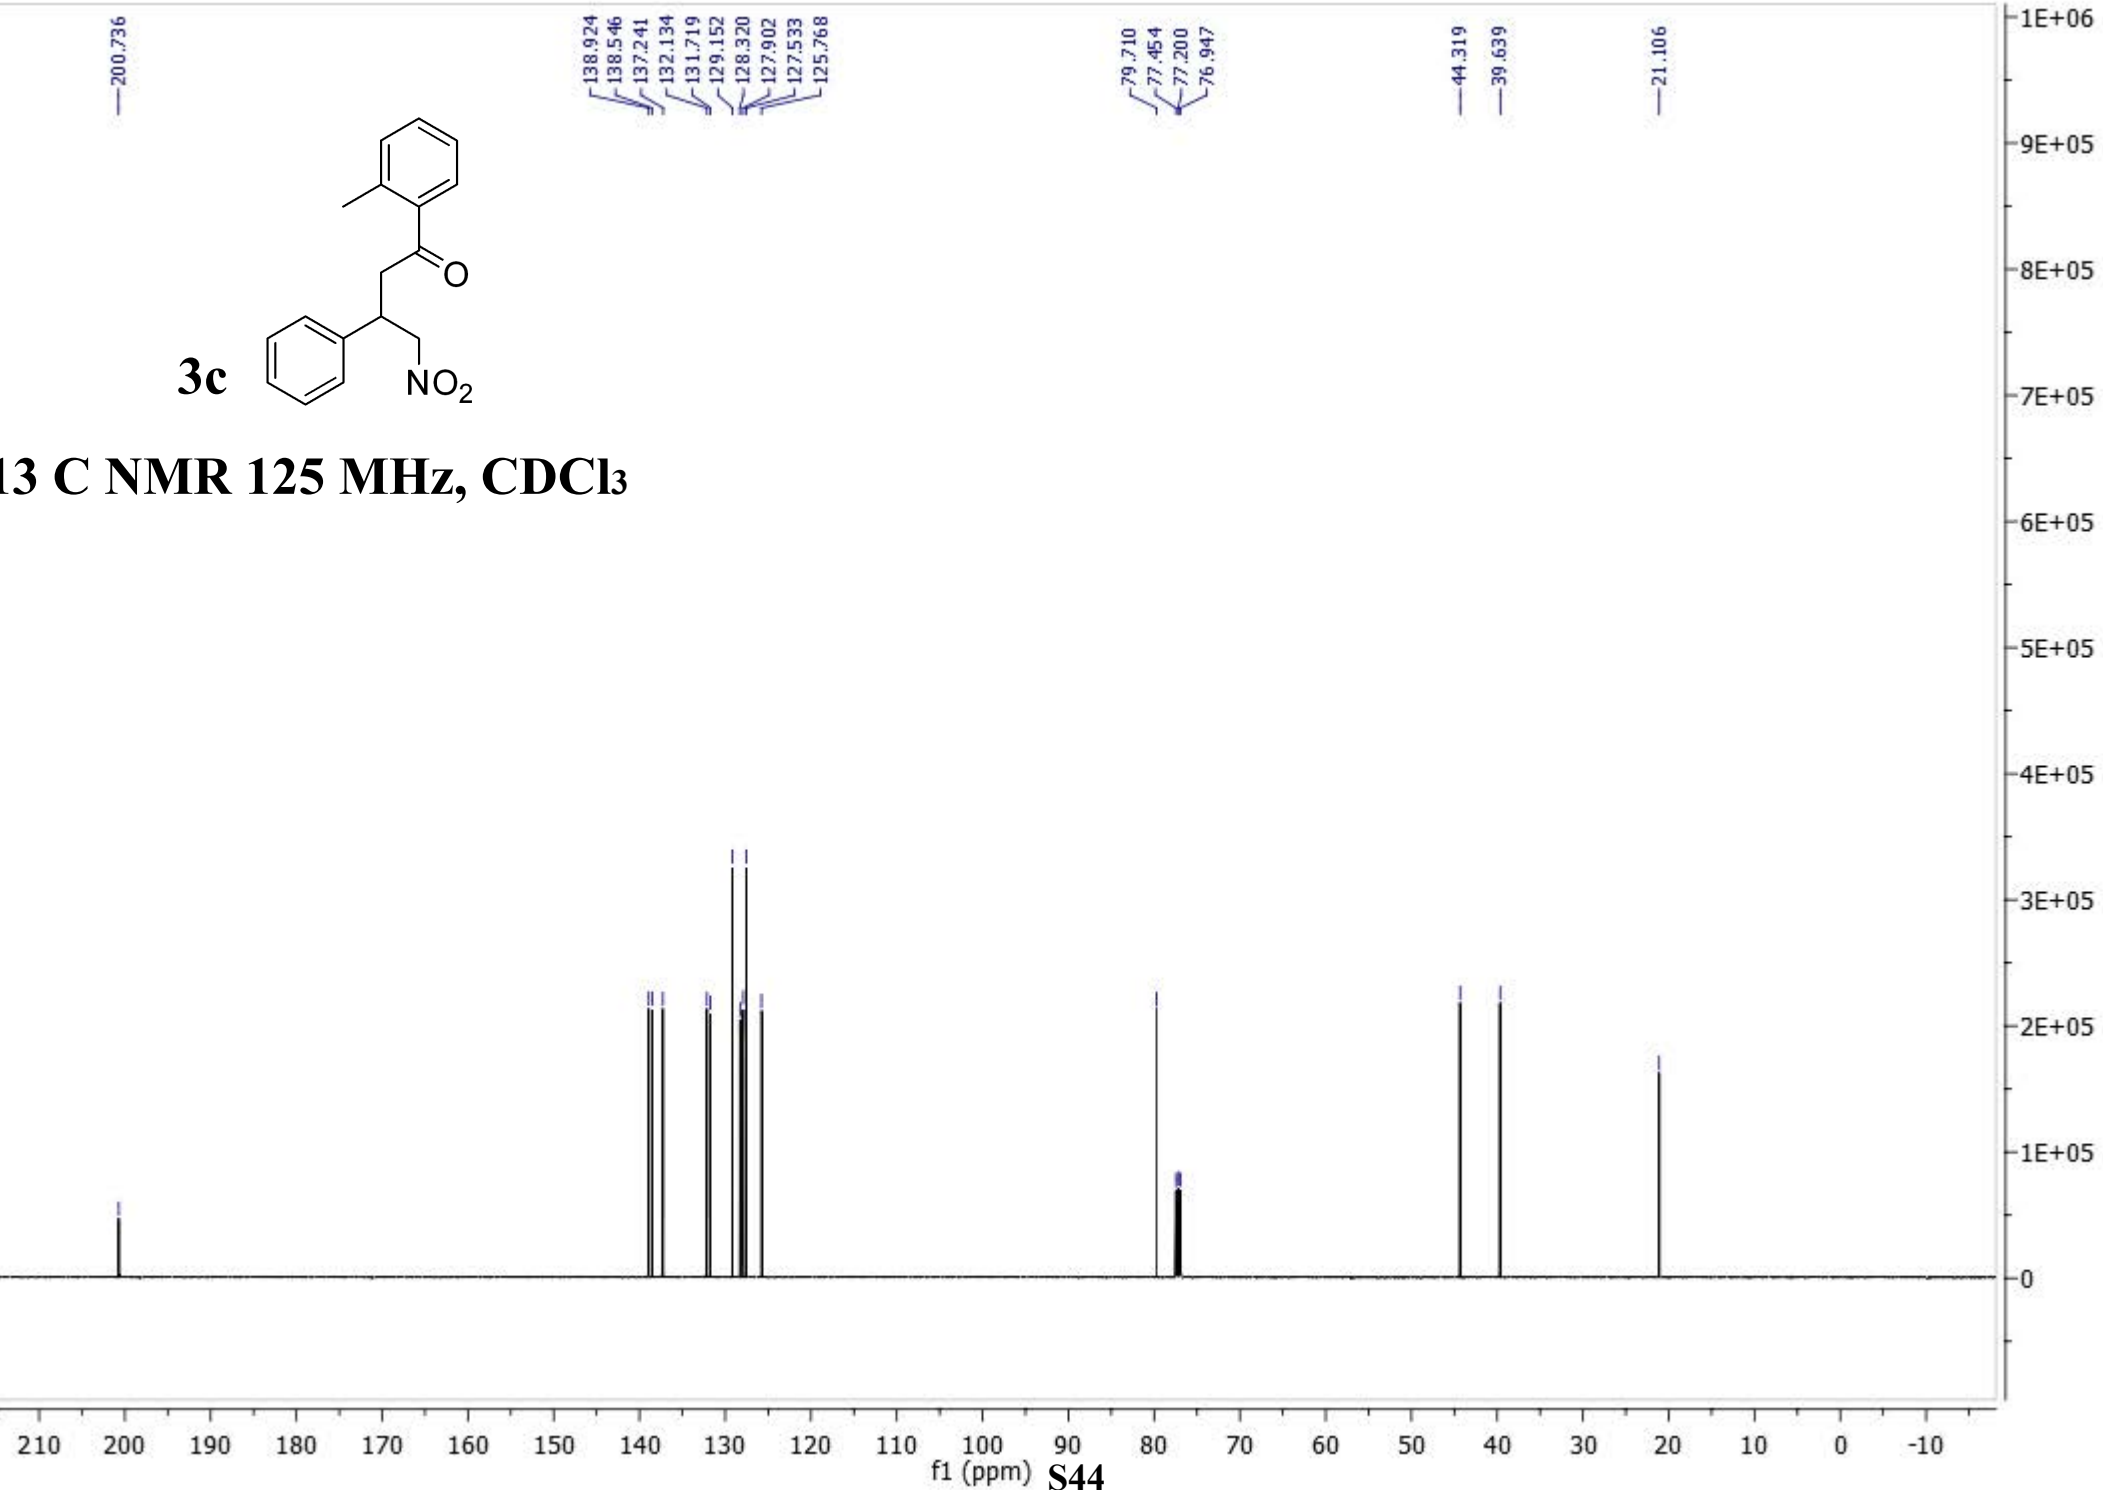

**3d**

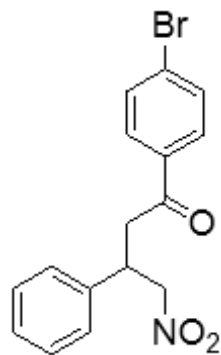

**<sup>13</sup>C NMR 125 MHz, CDCl<sub>3</sub>**

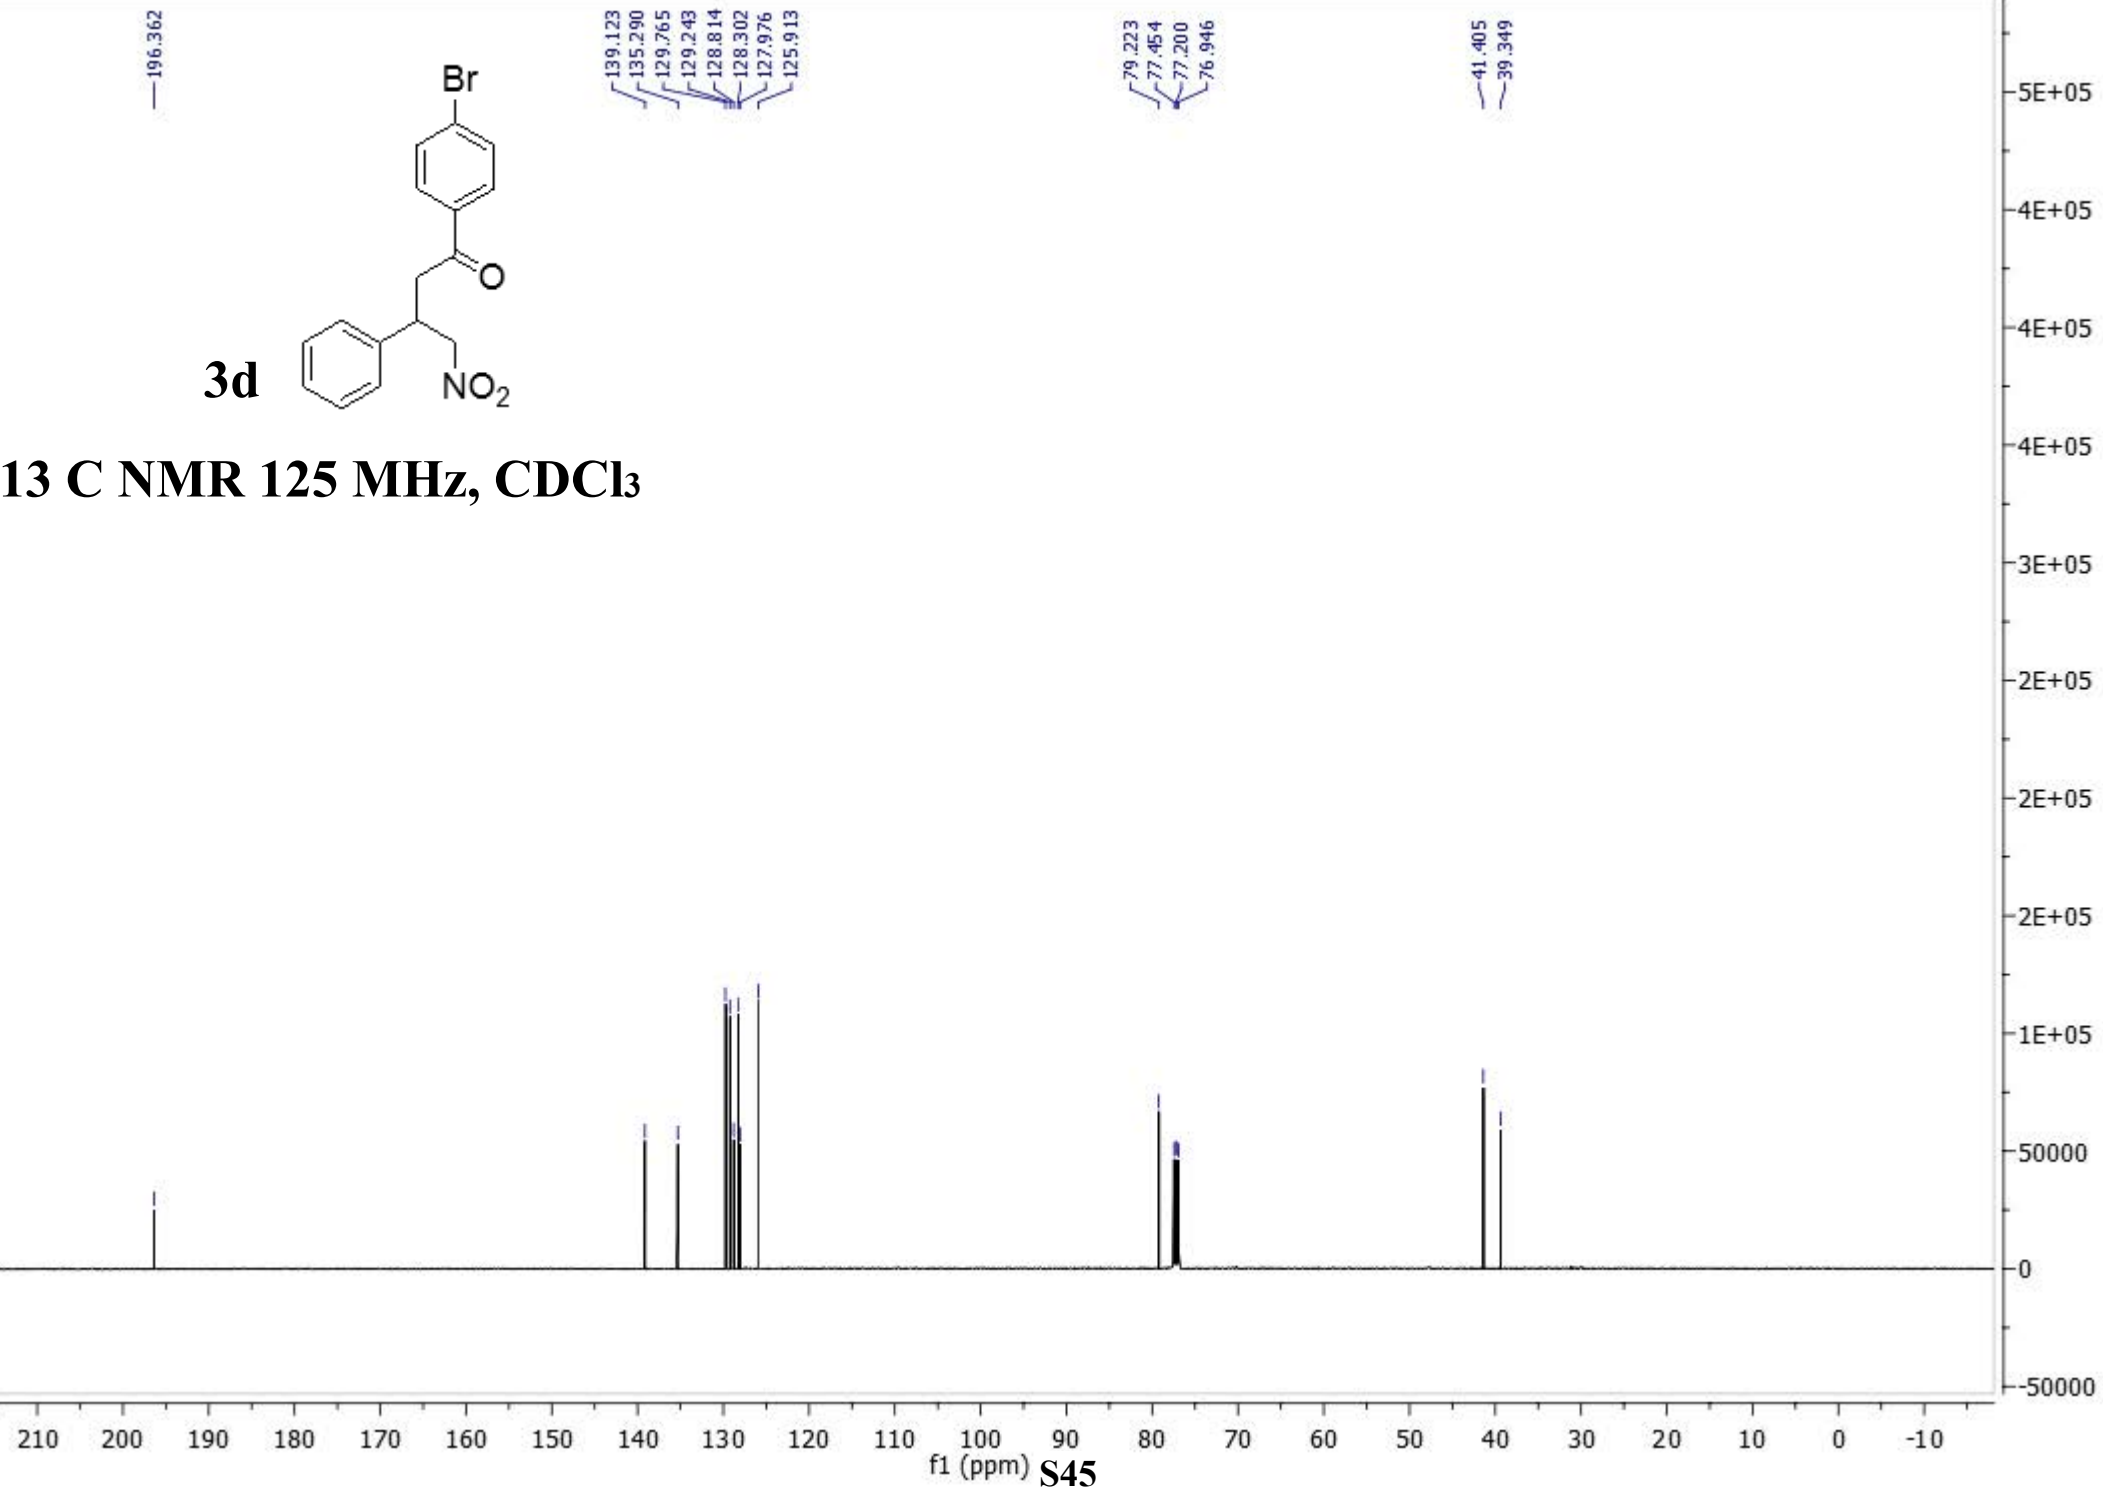

**3e**

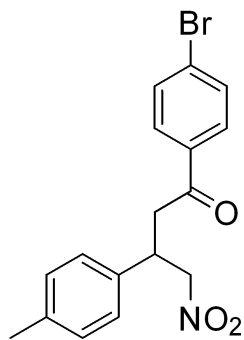

### 13 C NMR 125 MHz, CDCl<sub>3</sub>

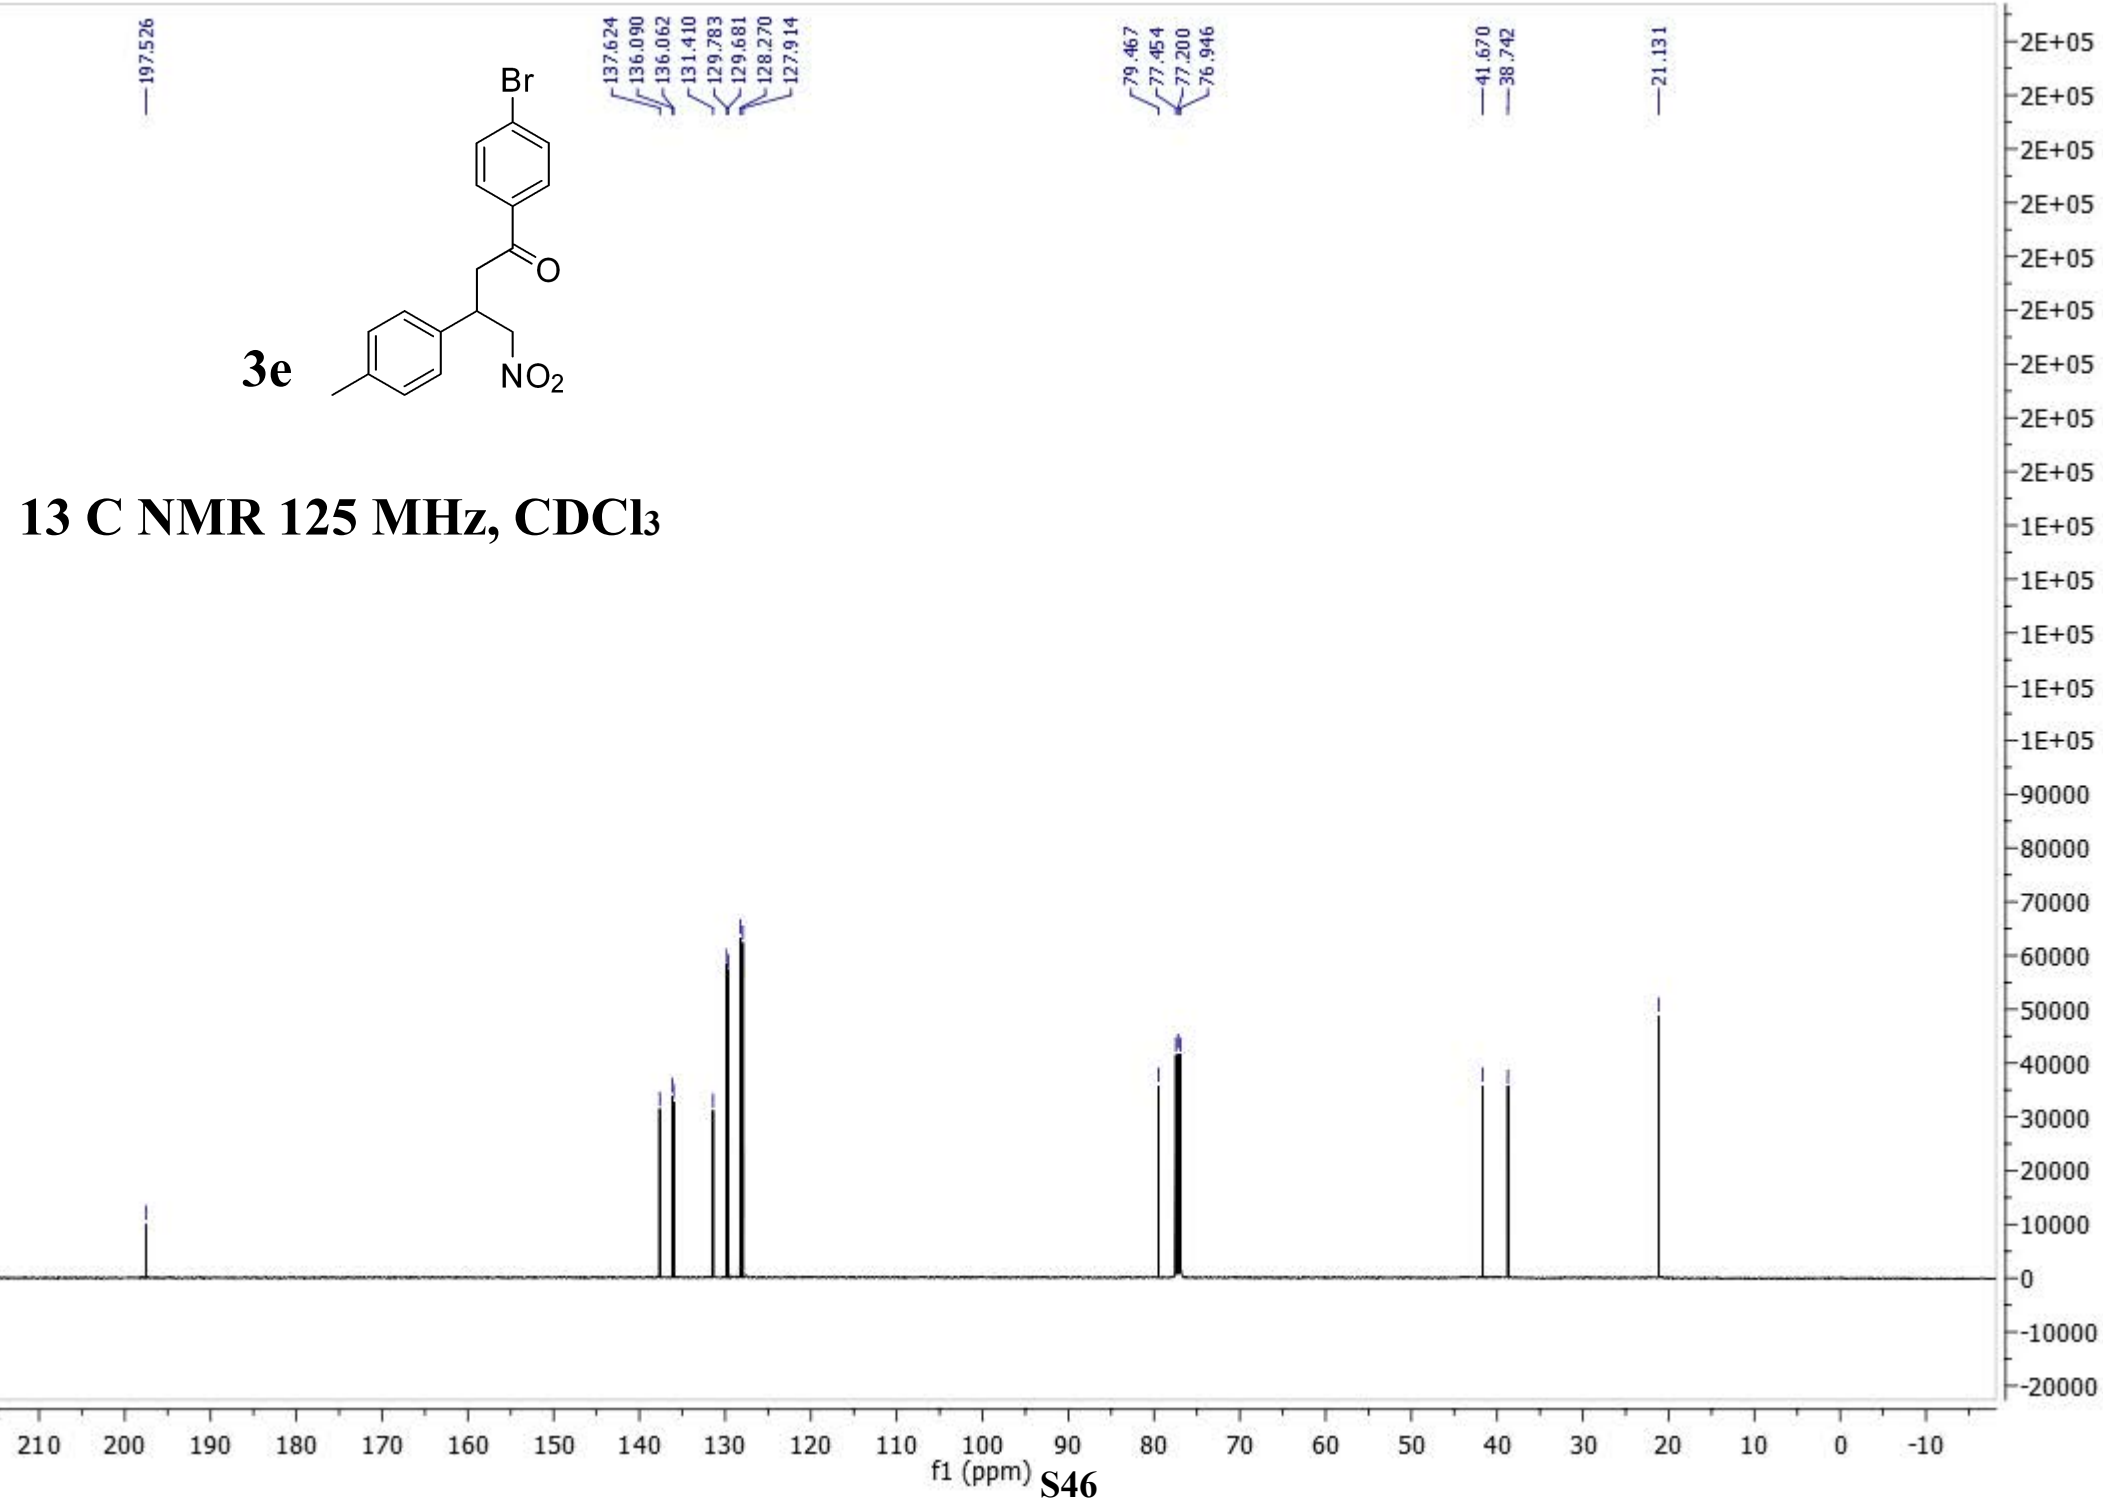

**3f**

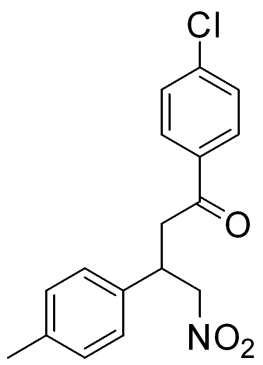

**$^{13}\text{C}$  NMR 125 MHz,  $\text{CDCl}_3$**

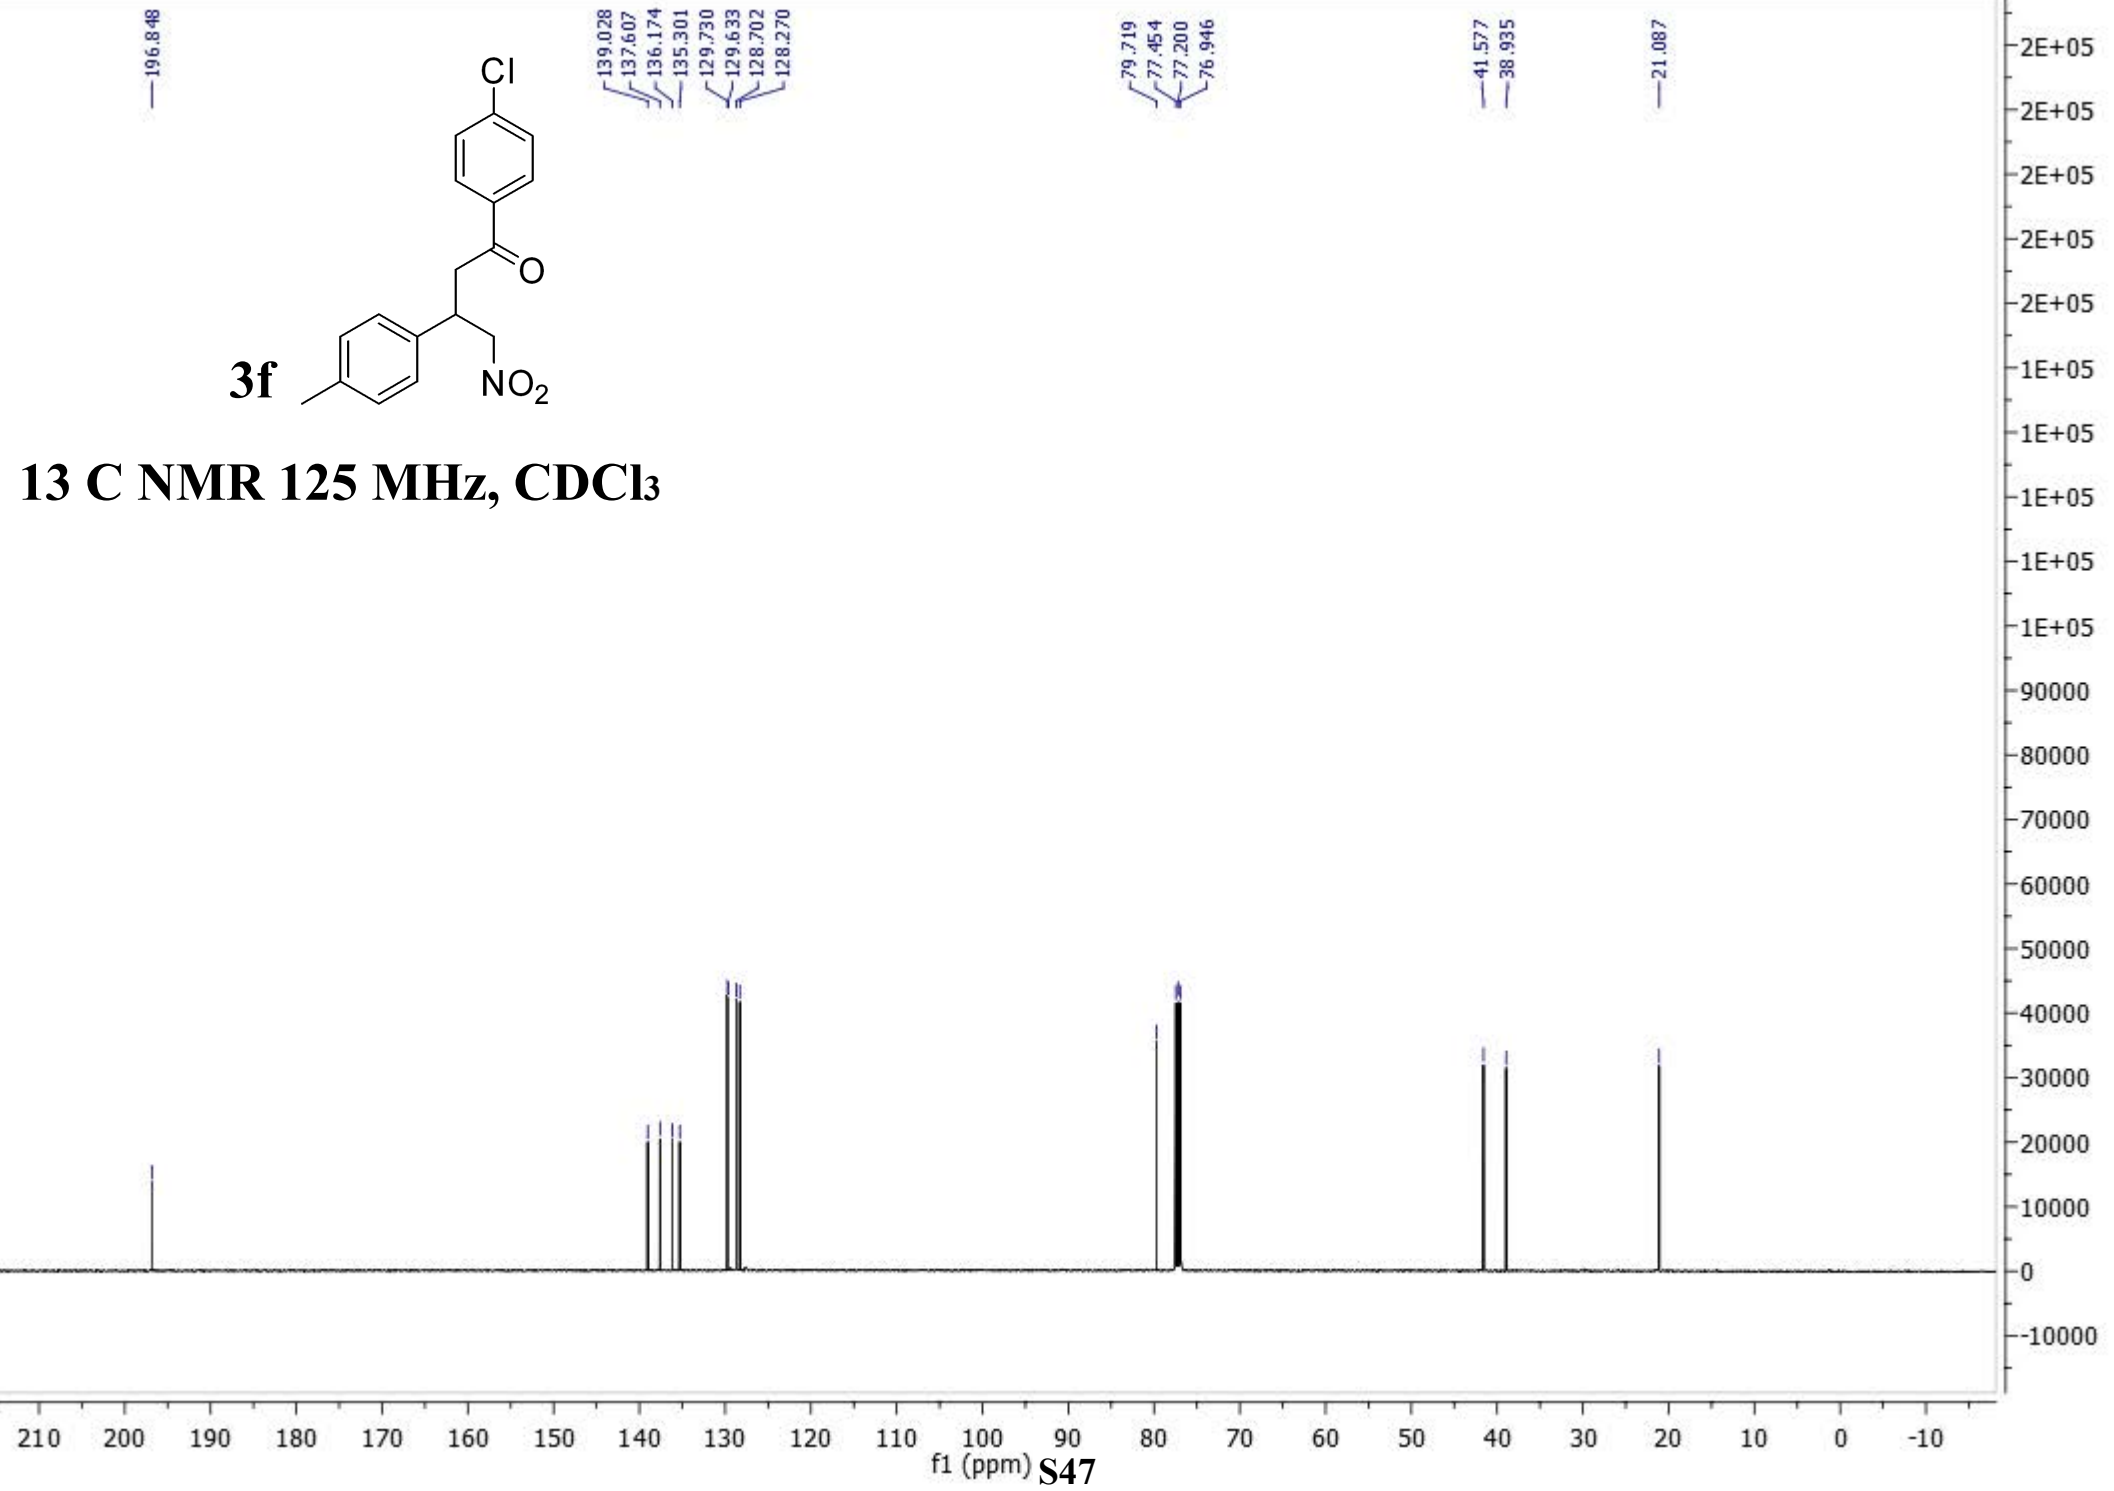

**3g**  
**13 C NMR 125 MHz, CDCl<sub>3</sub>**

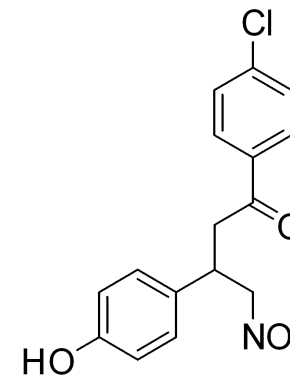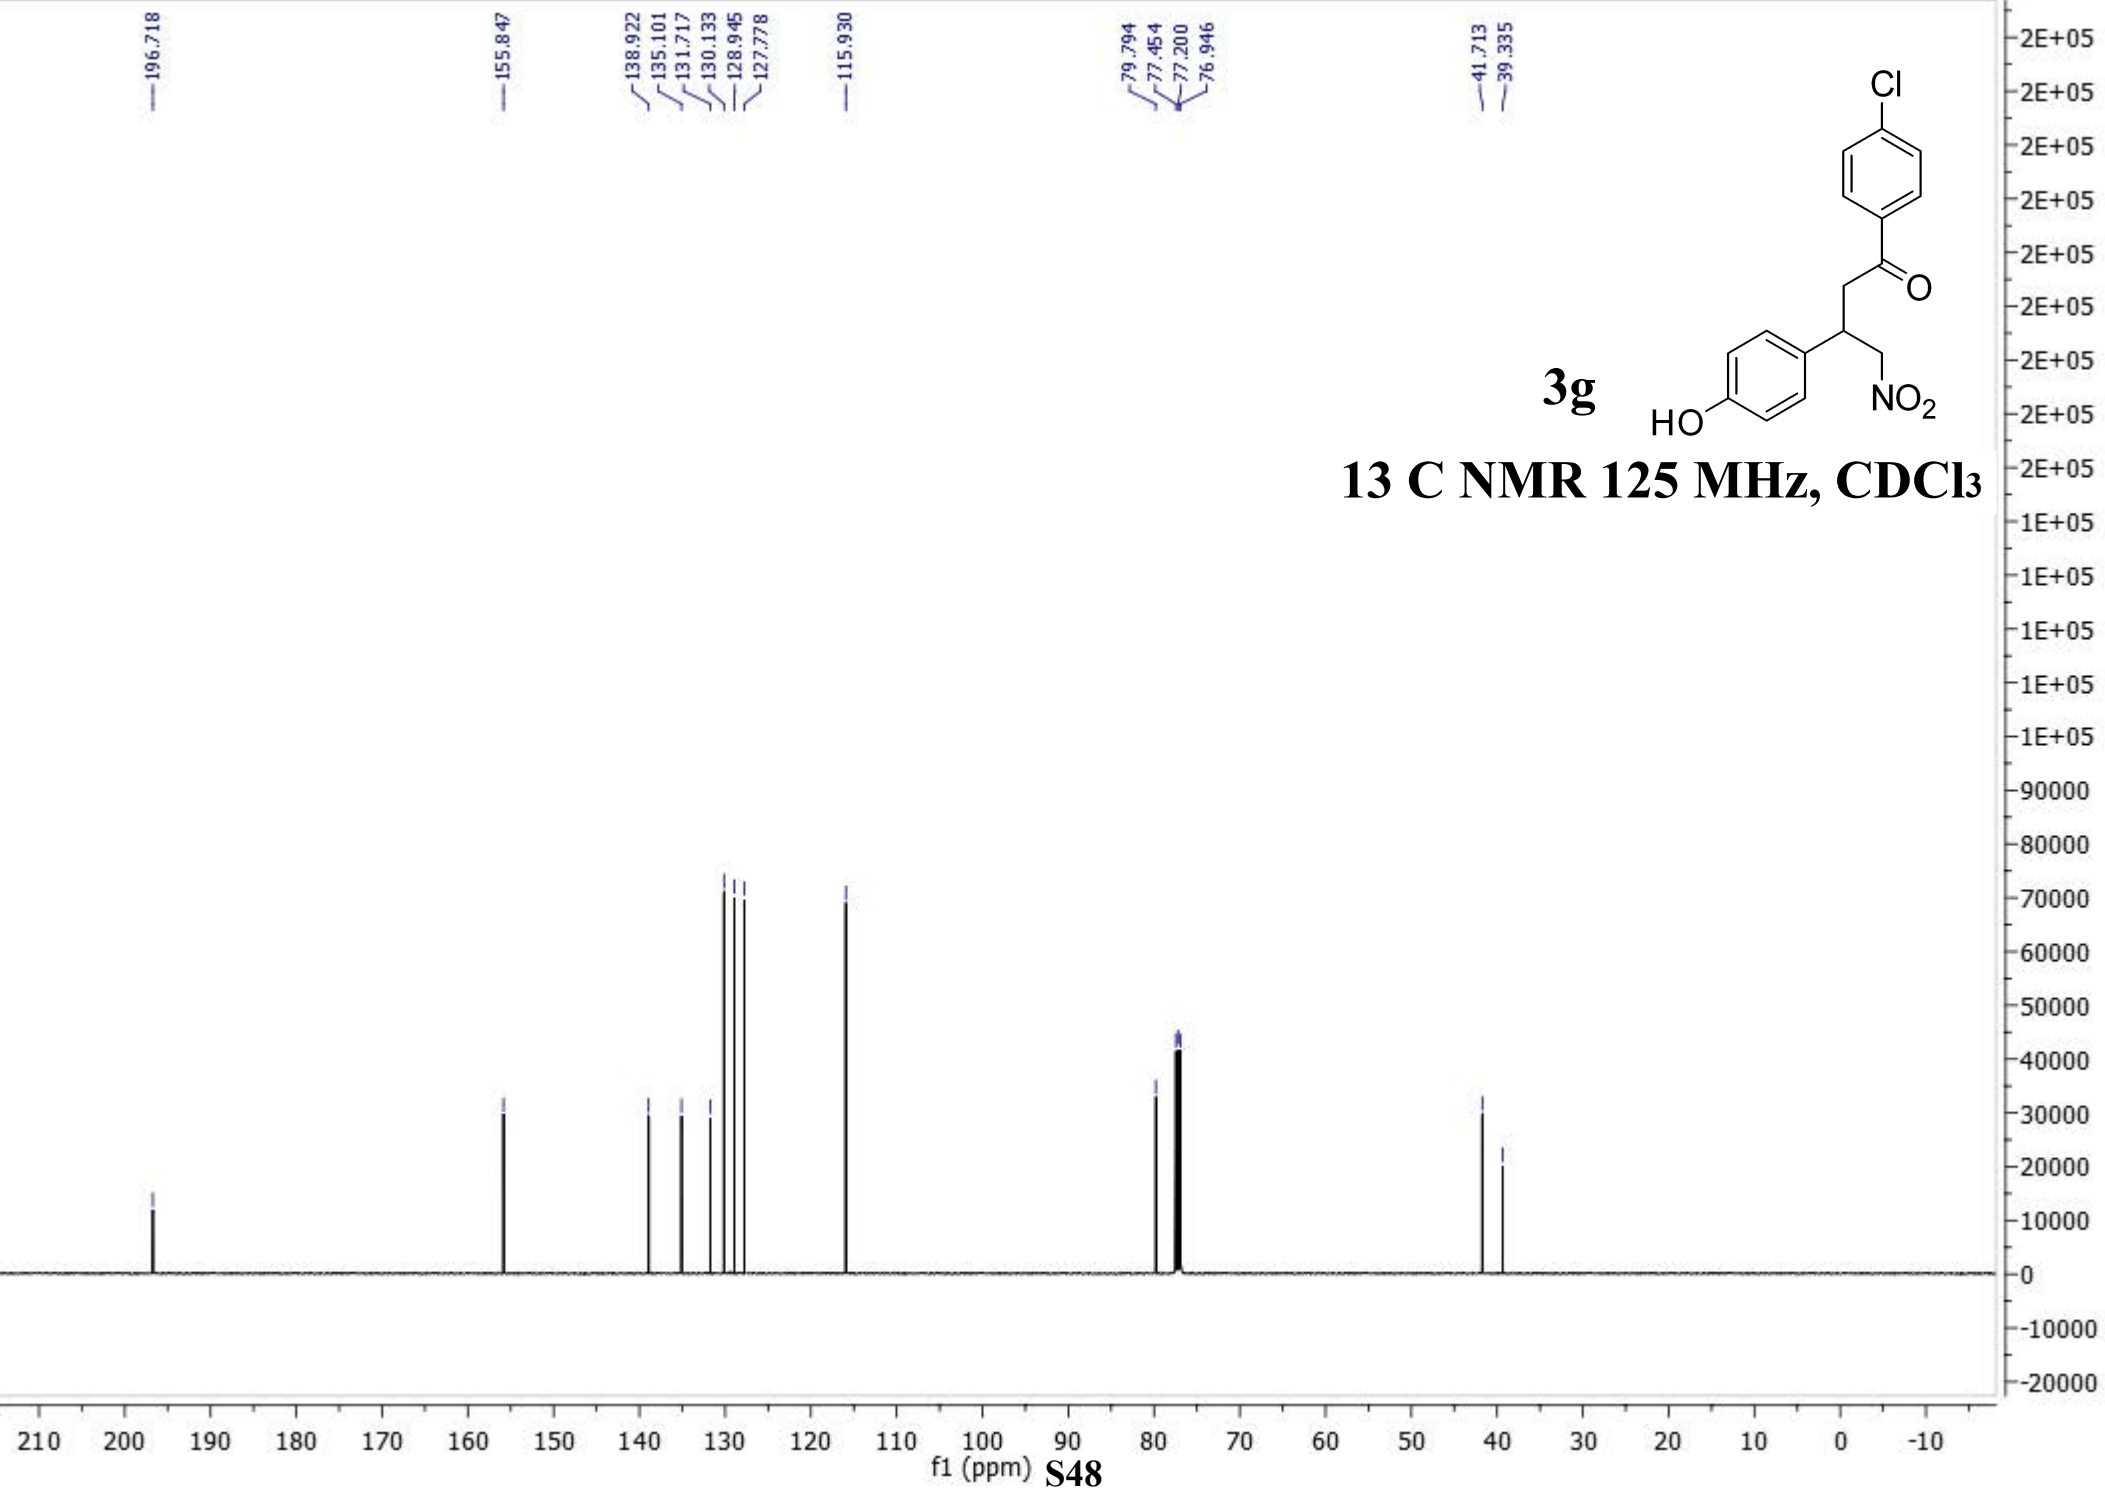



195.465

140.101  
137.637  
134.742  
134.011  
129.624  
129.501  
129.312  
129.111

79.489  
77.453  
77.200  
76.946

41.511  
38.711

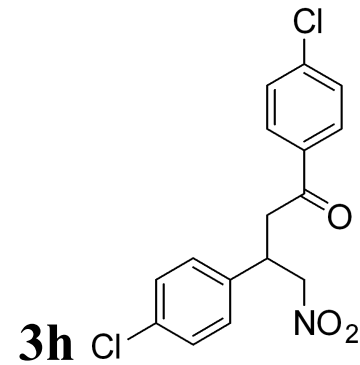

**13 C NMR 125 MHz, CDCl<sub>3</sub>**

210 200 190 180 170 160 150 140 130 120 110 100 90 80 70 60 50 40 30 20 10 0 -10

f1 (ppm) **S49**

3E+05  
3E+05  
2E+05  
2E+05  
2E+05  
1E+05  
1E+05  
1E+05  
80000  
60000  
40000  
20000  
0  
-20000

**3i**

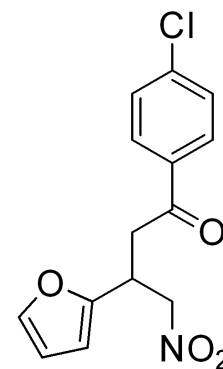

**<sup>13</sup>C NMR 125 MHz, CDCl<sub>3</sub>**

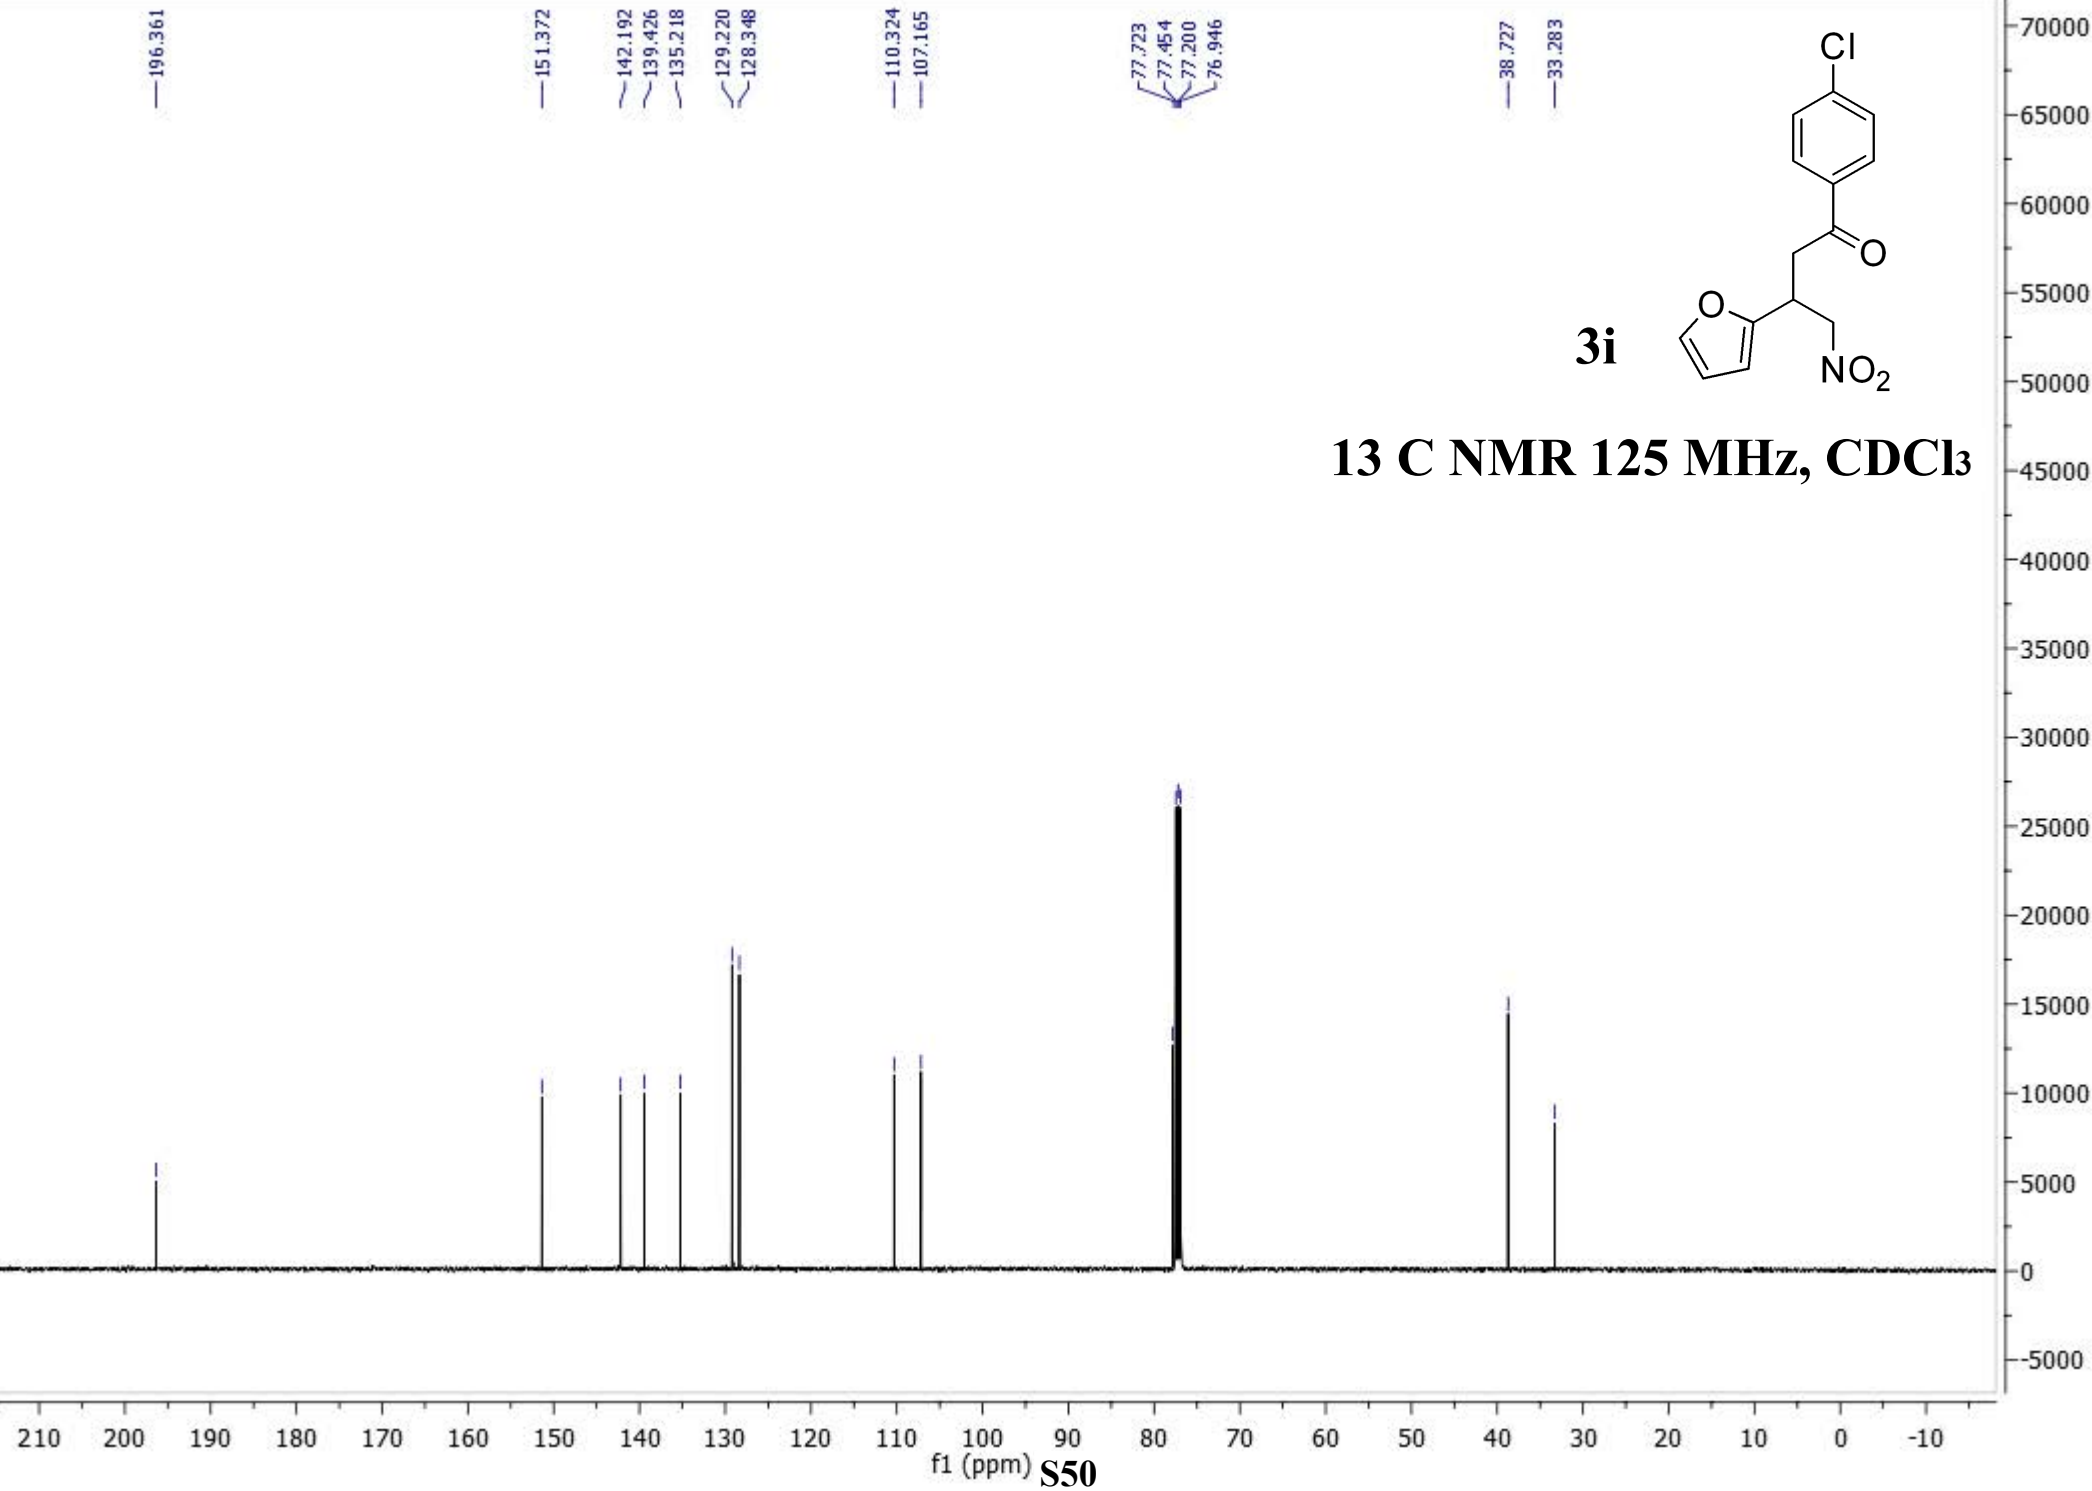

196.542

139.136  
135.494  
133.846  
133.108  
130.373  
129.072  
128.708  
128.361  
128.148  
128.049  
127.734  
126.424  
126.005  
124.395

79.636  
77.454  
77.200  
76.946

41.433  
39.336

3j

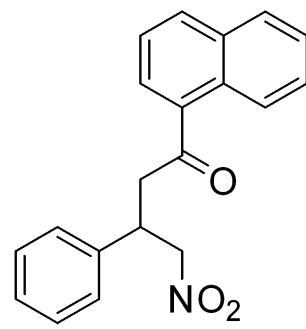

13 C NMR 125 MHz, CDCl<sub>3</sub>

210 200 190 180 170 160 150 140 130 120 110 100 90 80 70 60 50 40 30 20 10 0 -10

f1 (ppm) S51

3E+05  
3E+05  
3E+05  
2E+05  
2E+05  
2E+05  
2E+05  
1E+05  
1E+05  
1E+05  
80000  
60000  
40000  
20000  
0  
-20000

**3k**

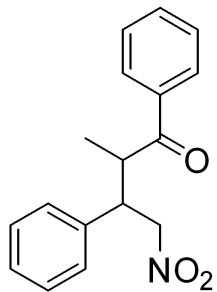

**$^{13}\text{C}$  NMR 125 MHz,  $\text{CDCl}_3$**

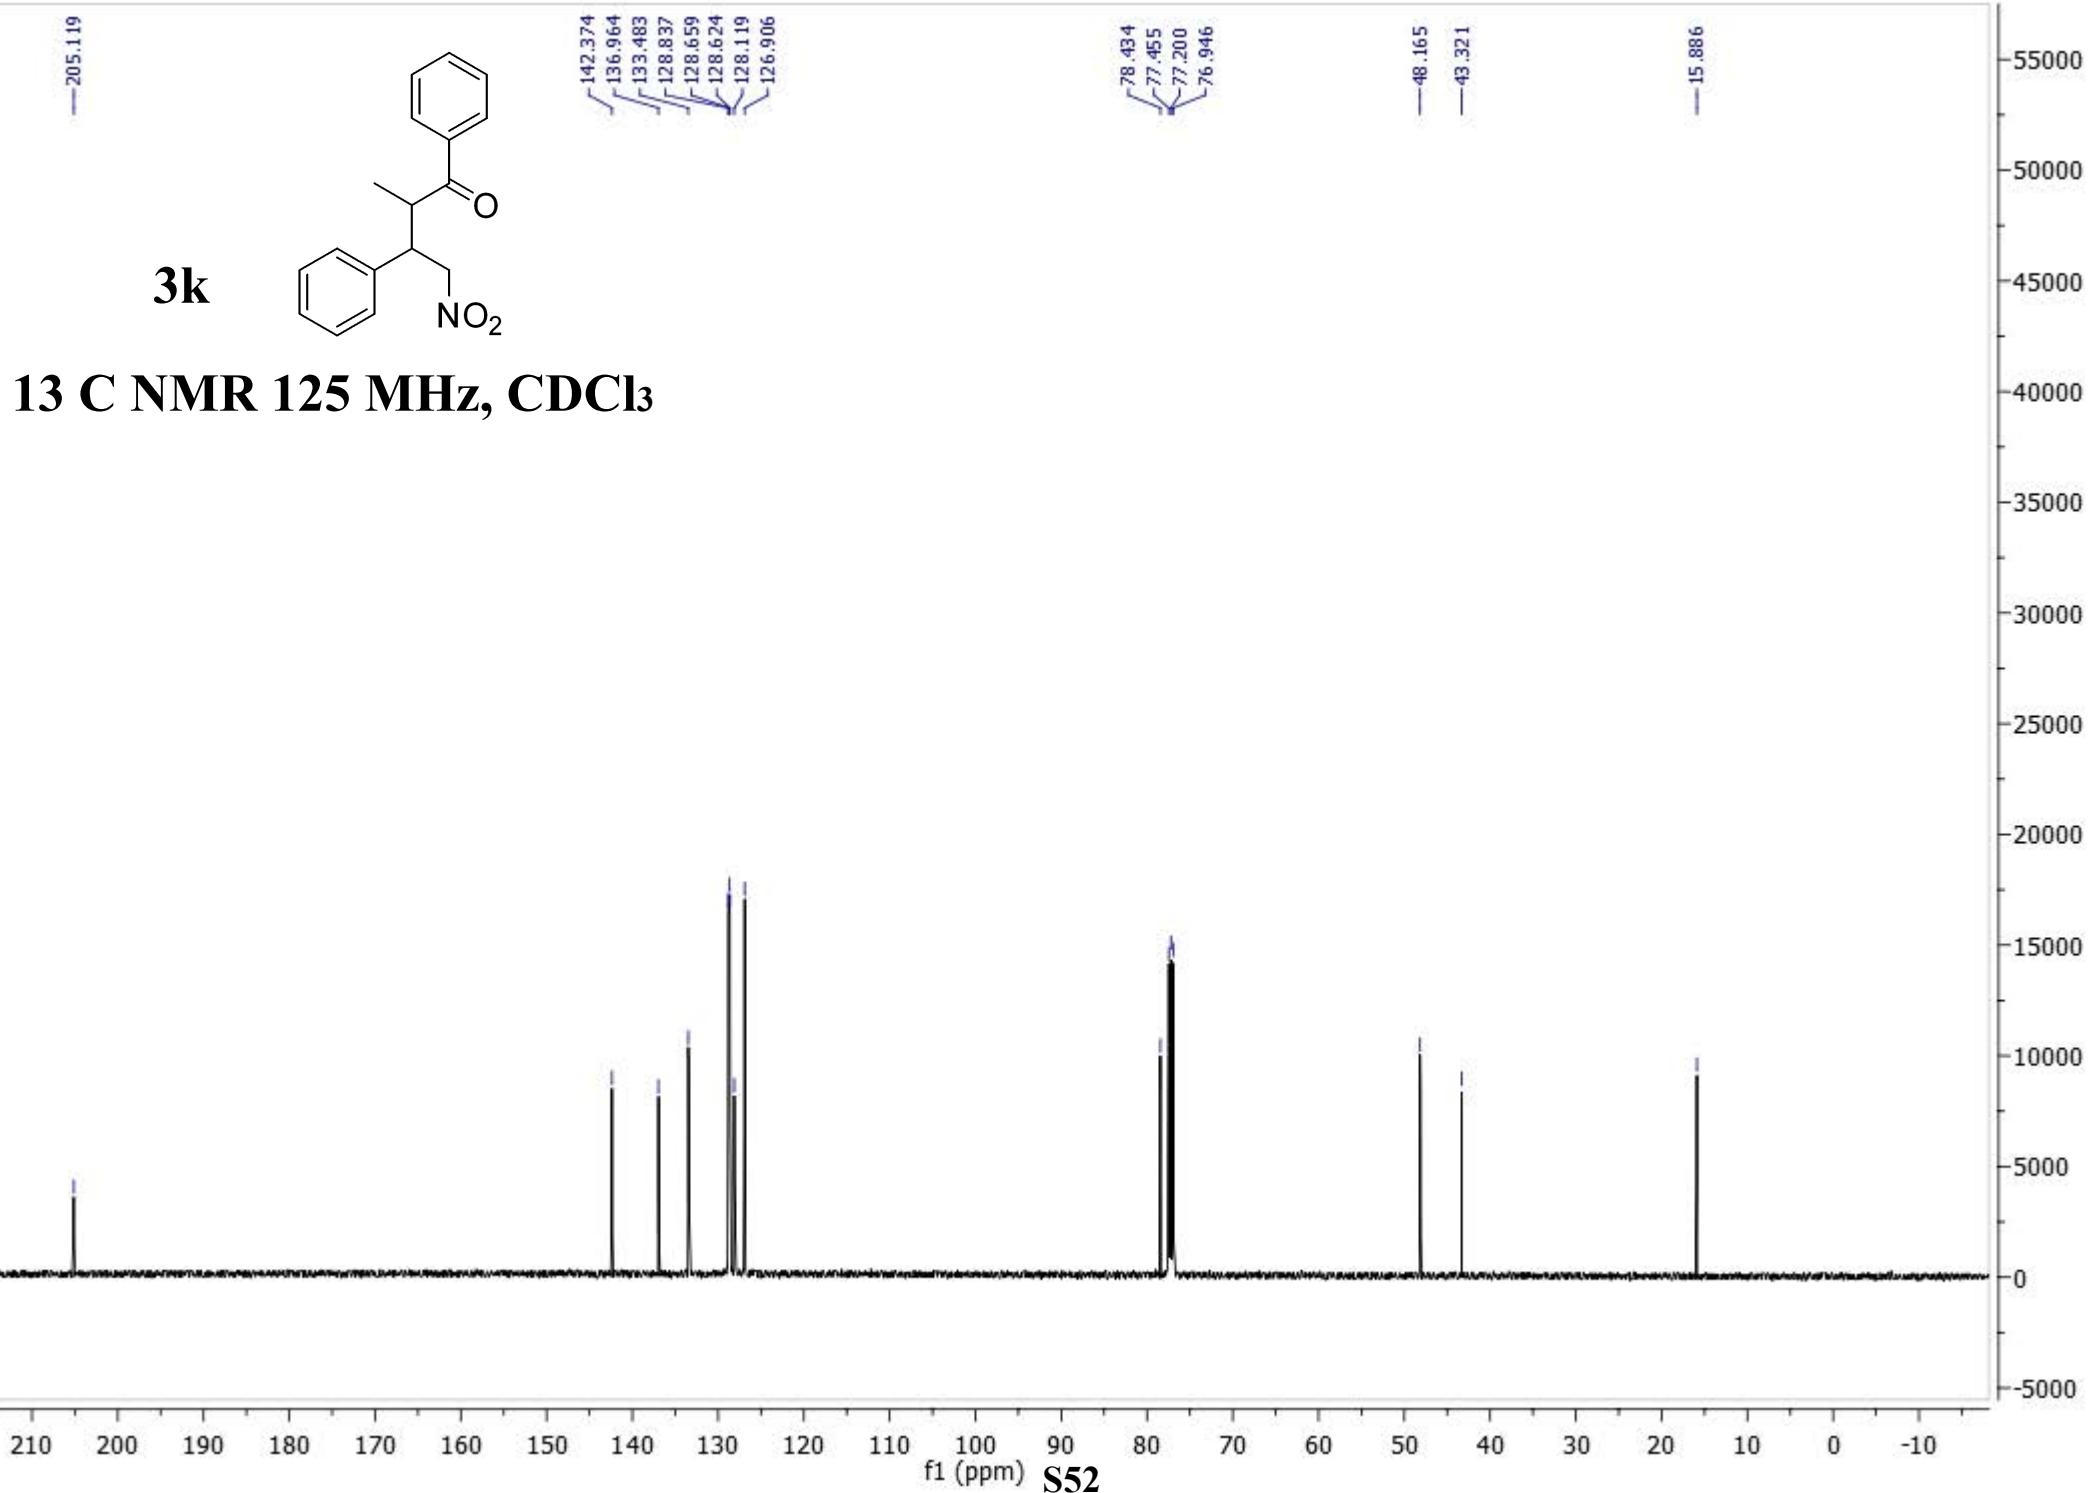

**31**

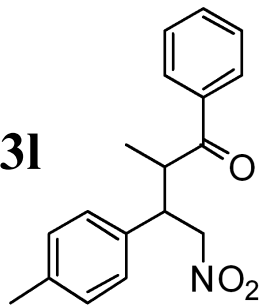

**13 C NMR 125 MHz, CDCl<sub>3</sub>**

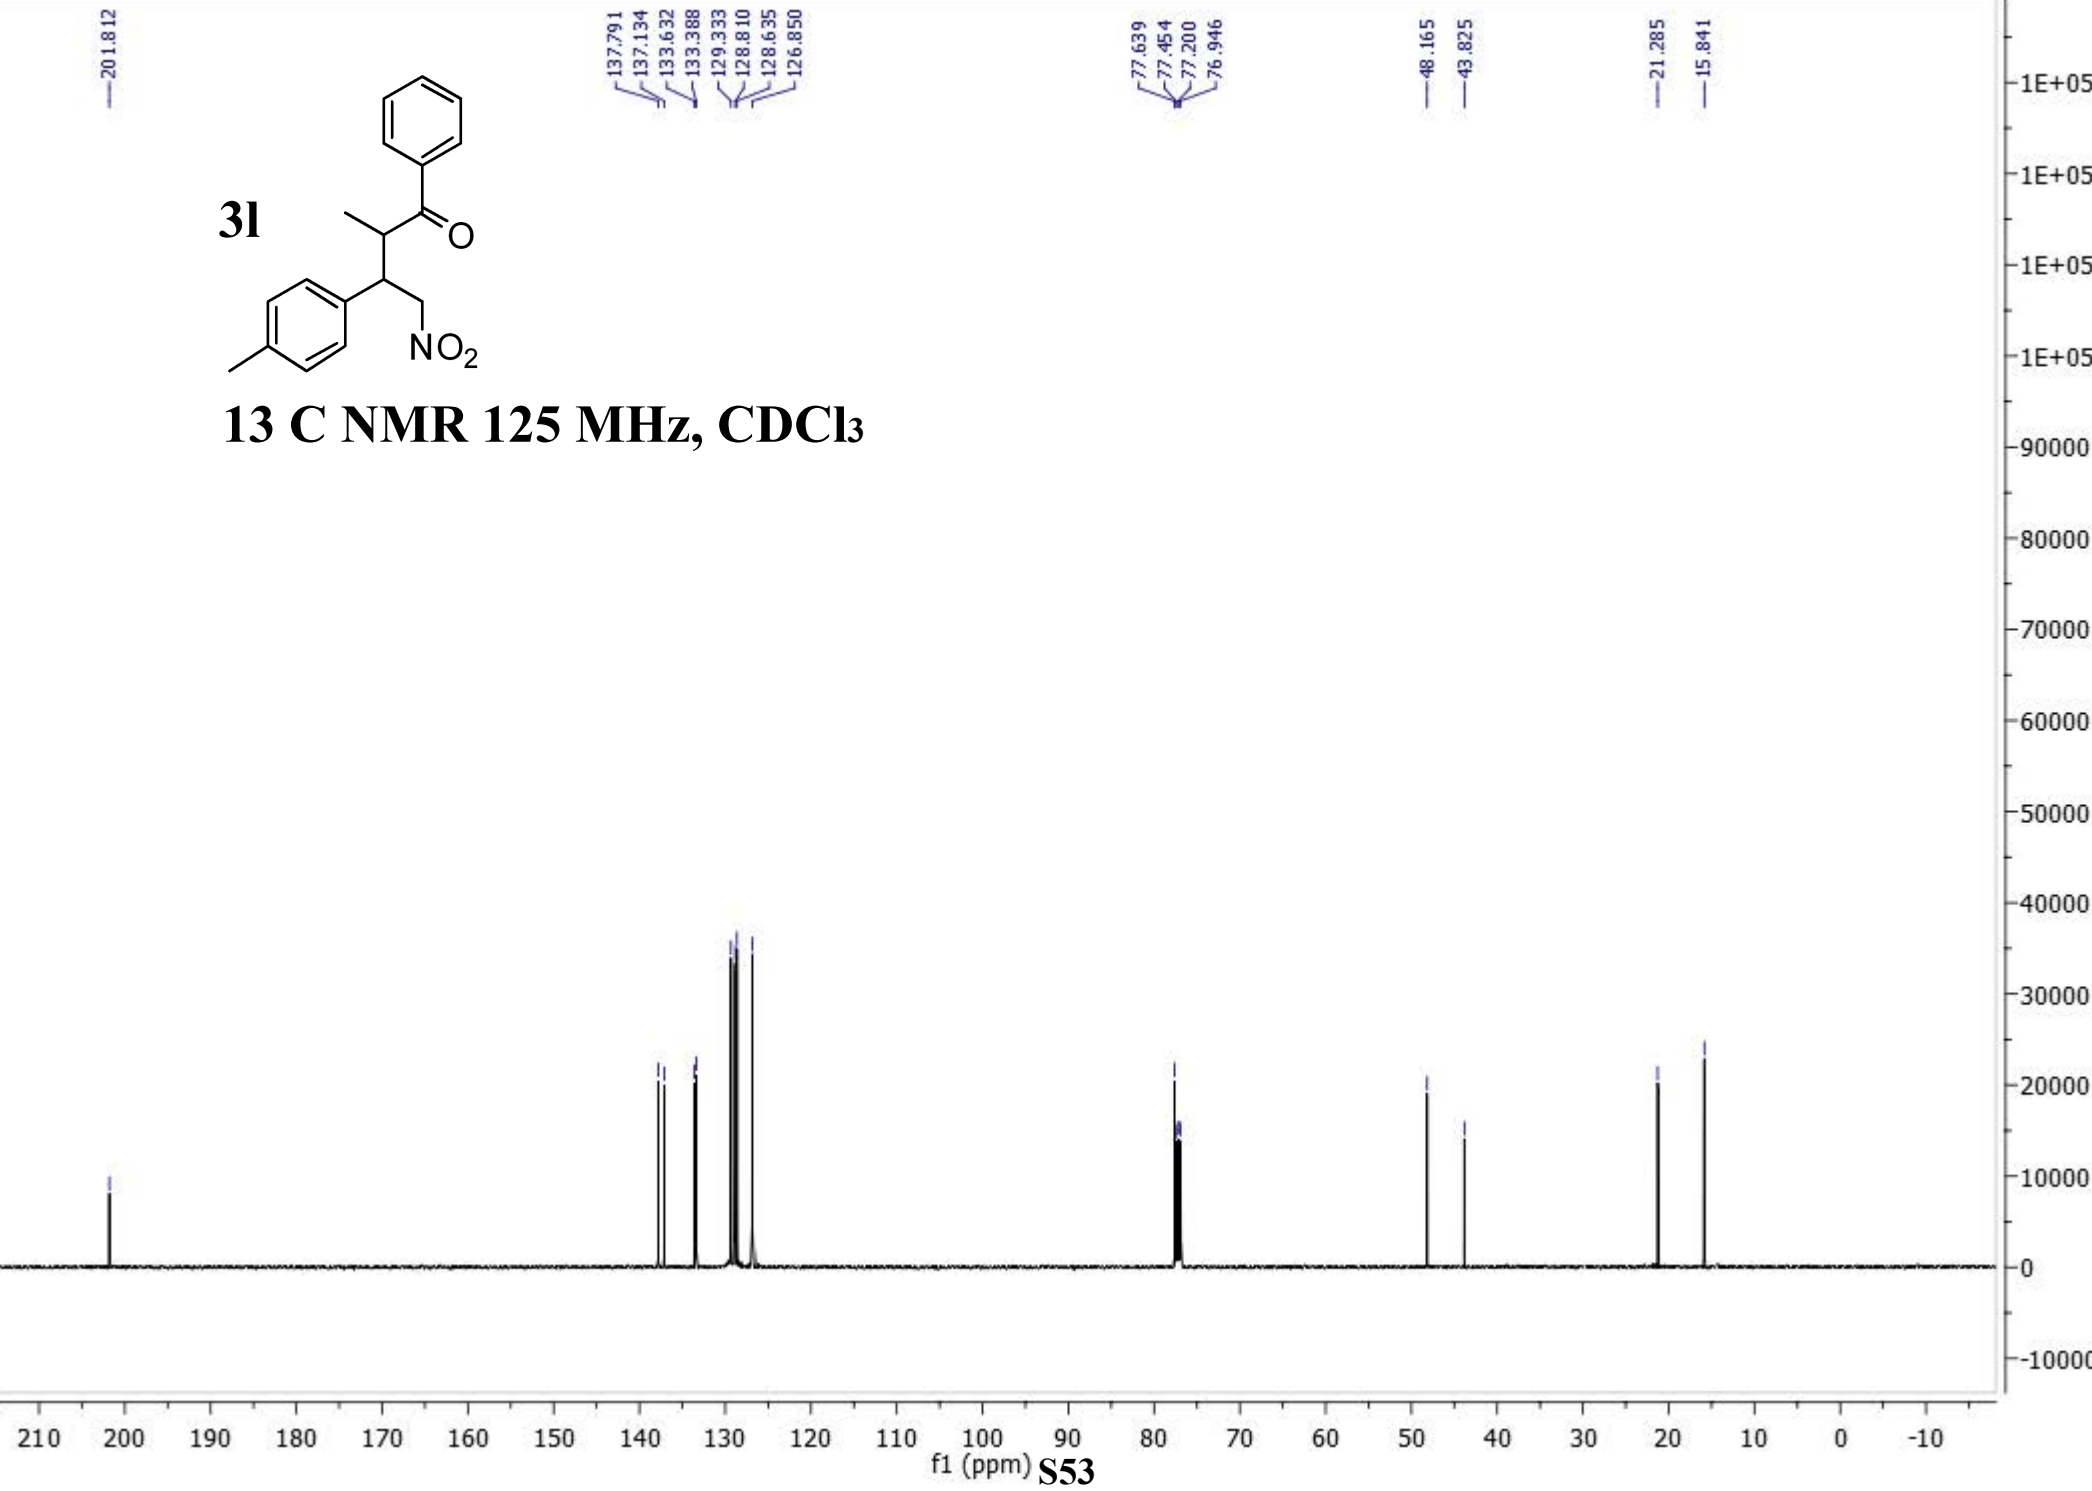

**3m**

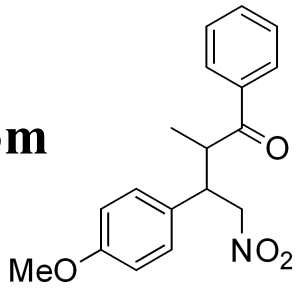

**<sup>13</sup>C NMR 125 MHz, CDCl<sub>3</sub>**

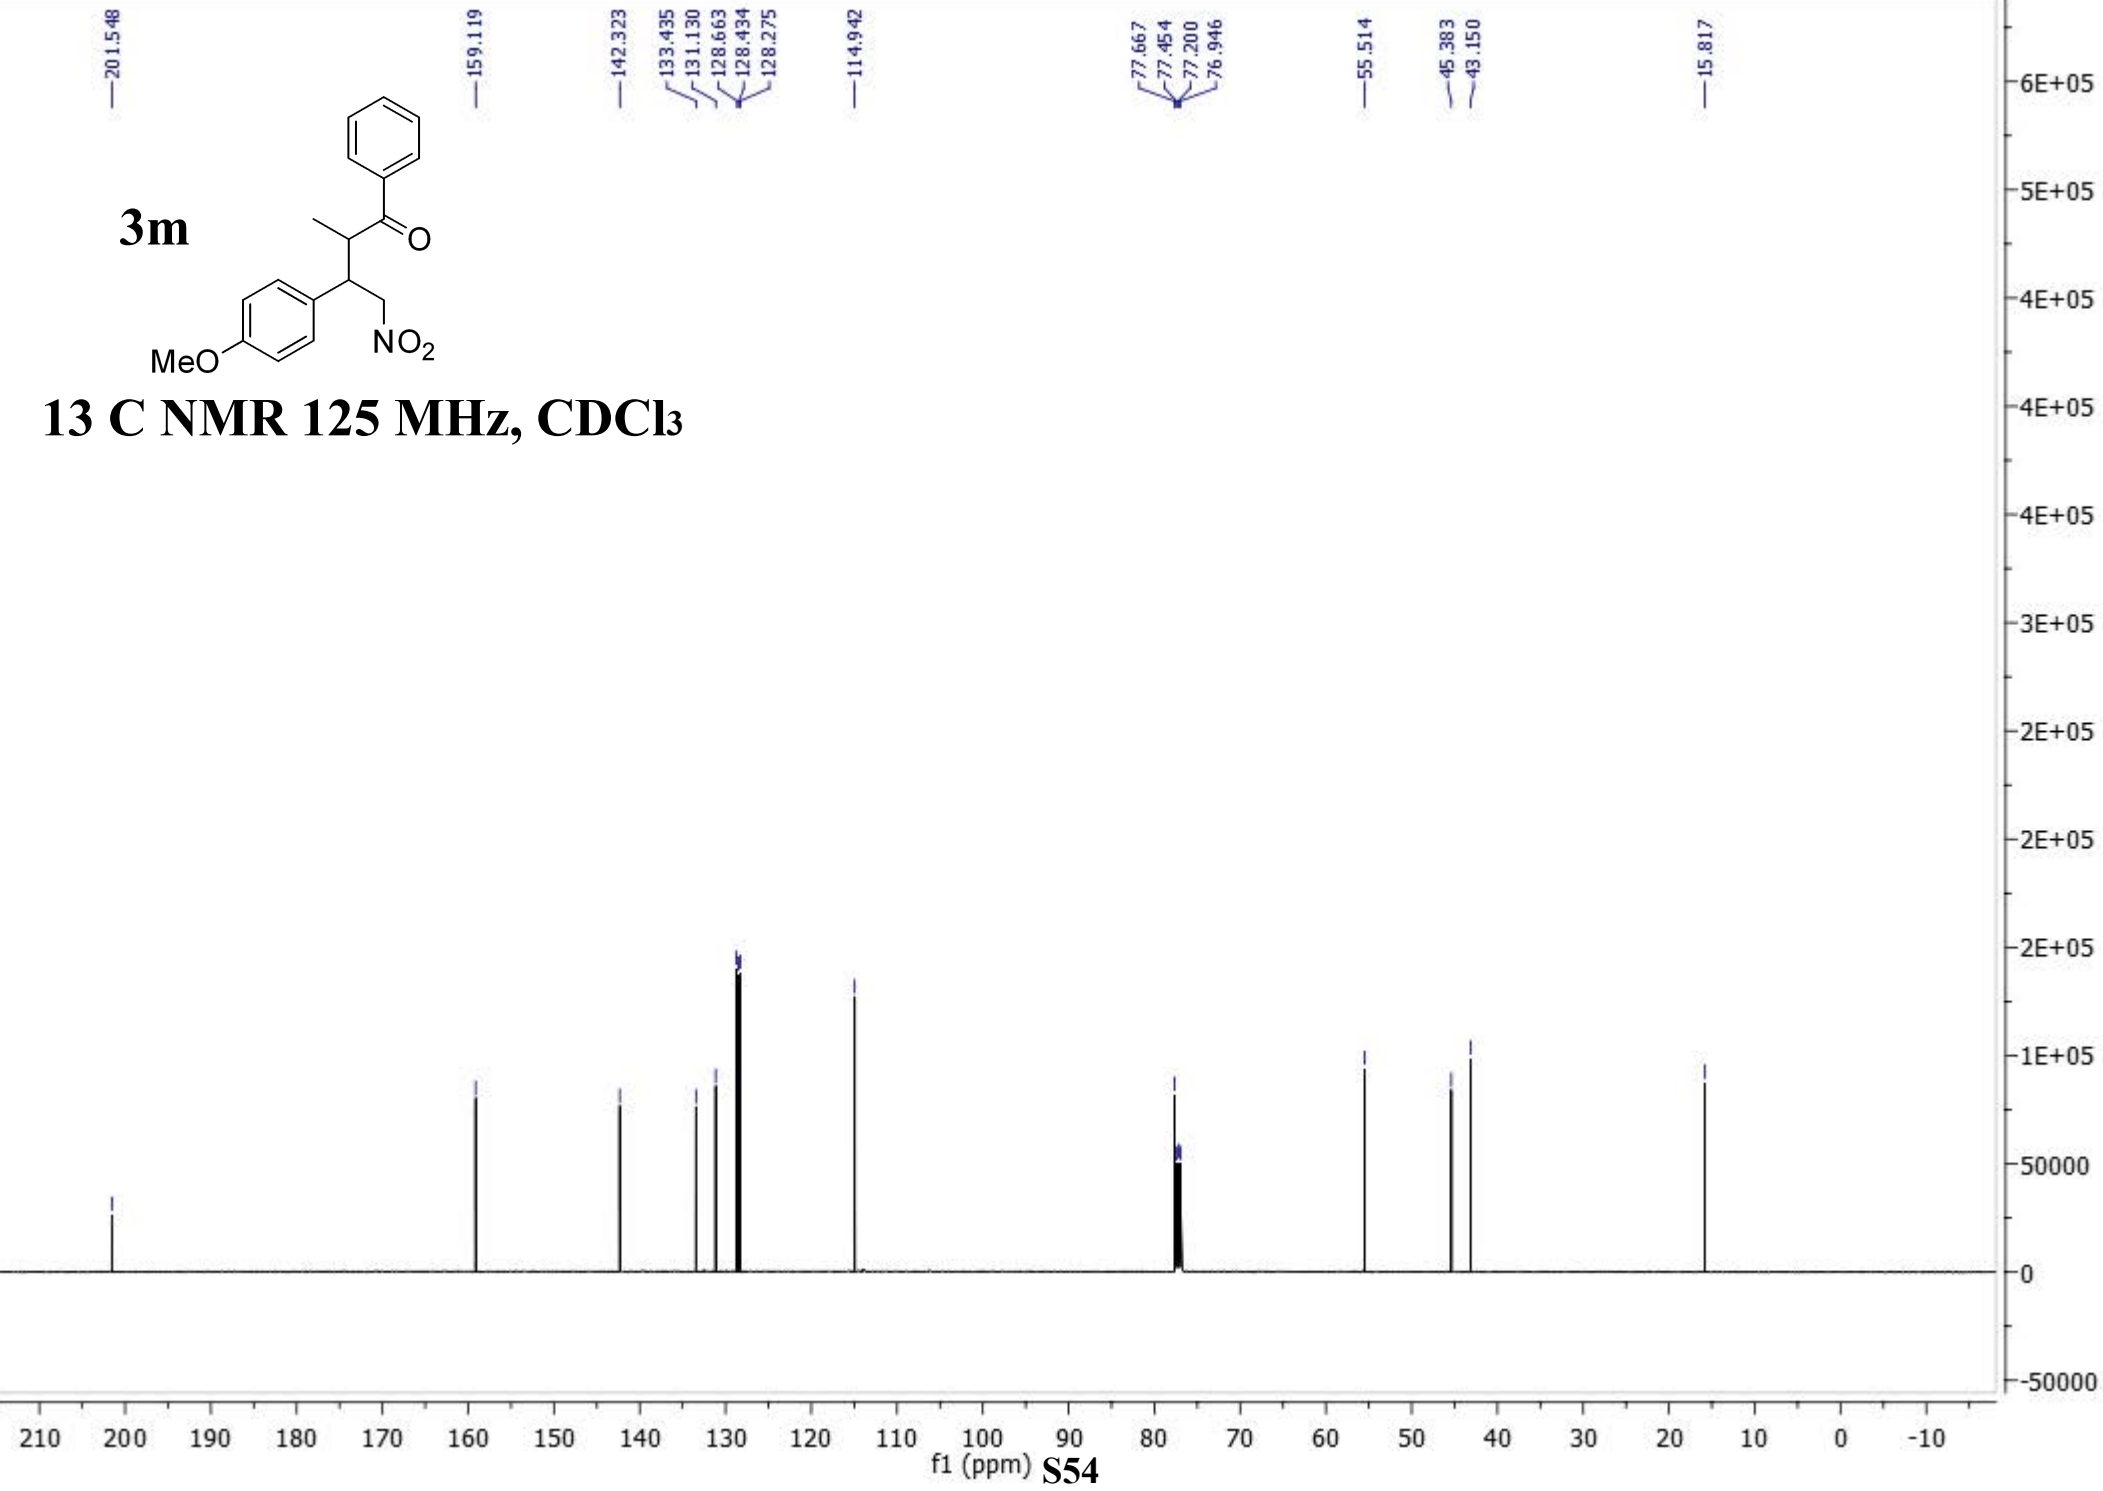

**3n**

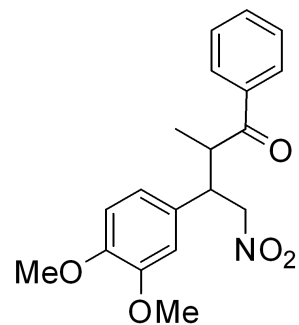

**<sup>13</sup>C NMR 125 MHz, CDCl<sub>3</sub>**

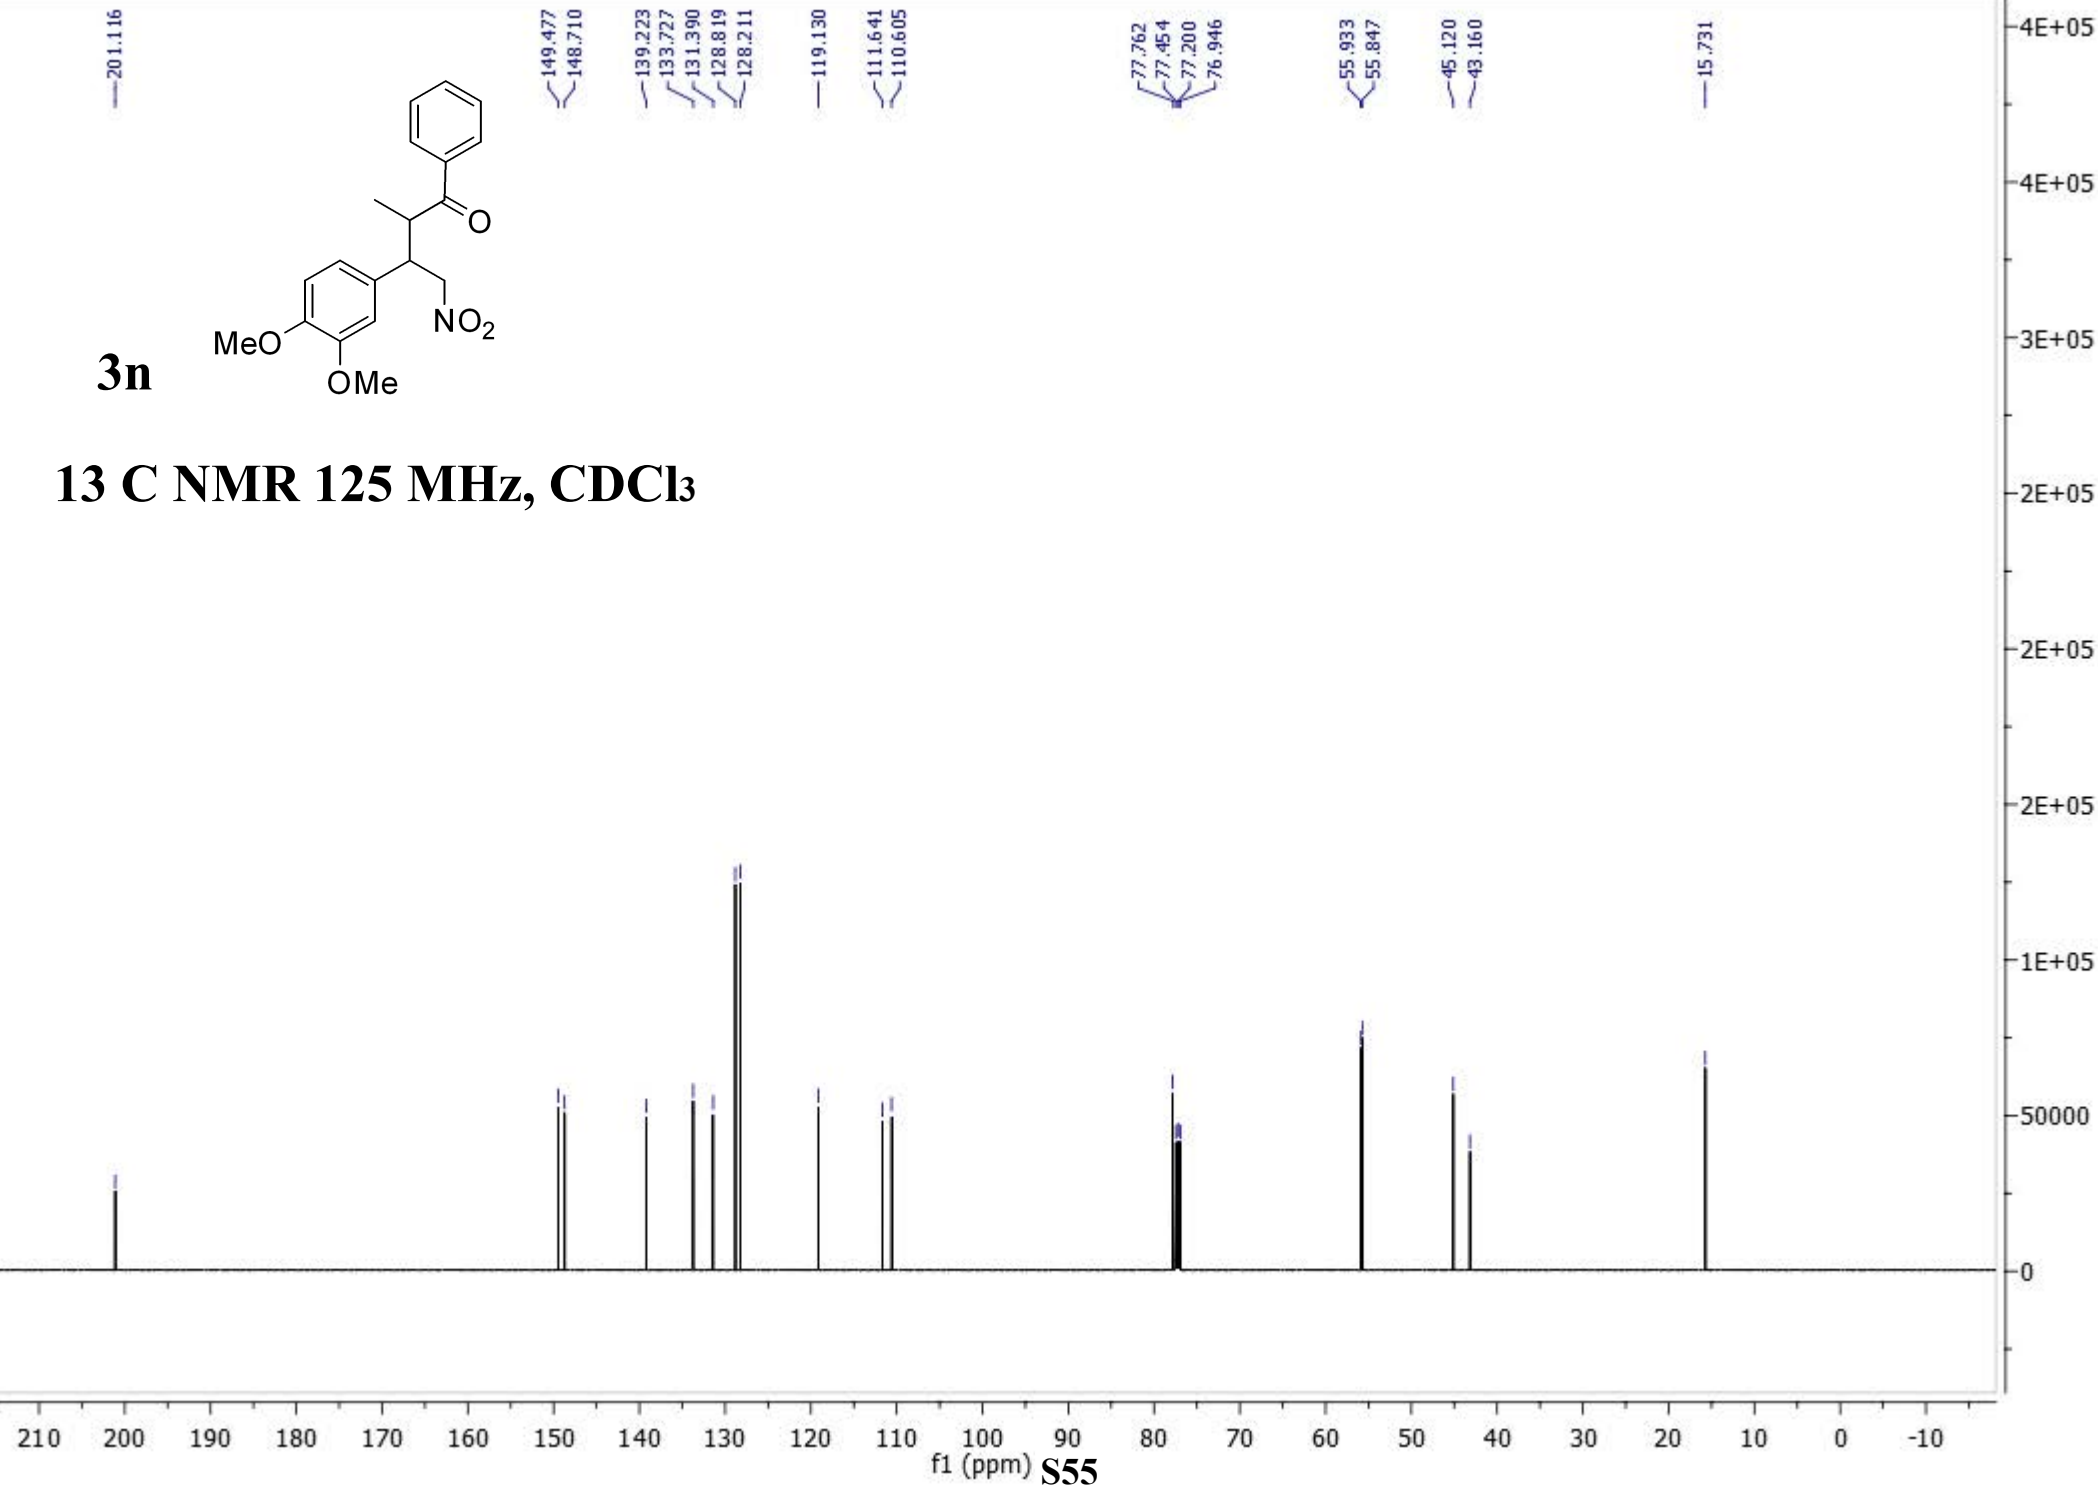

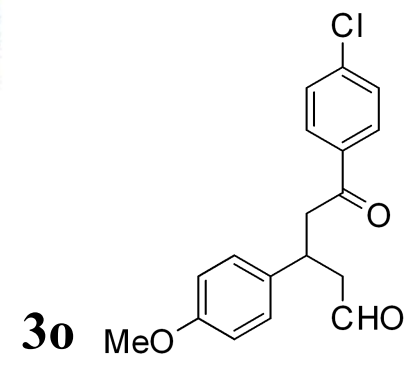

**$^{13}\text{C}$  NMR 125 MHz,  $\text{CDCl}_3$**

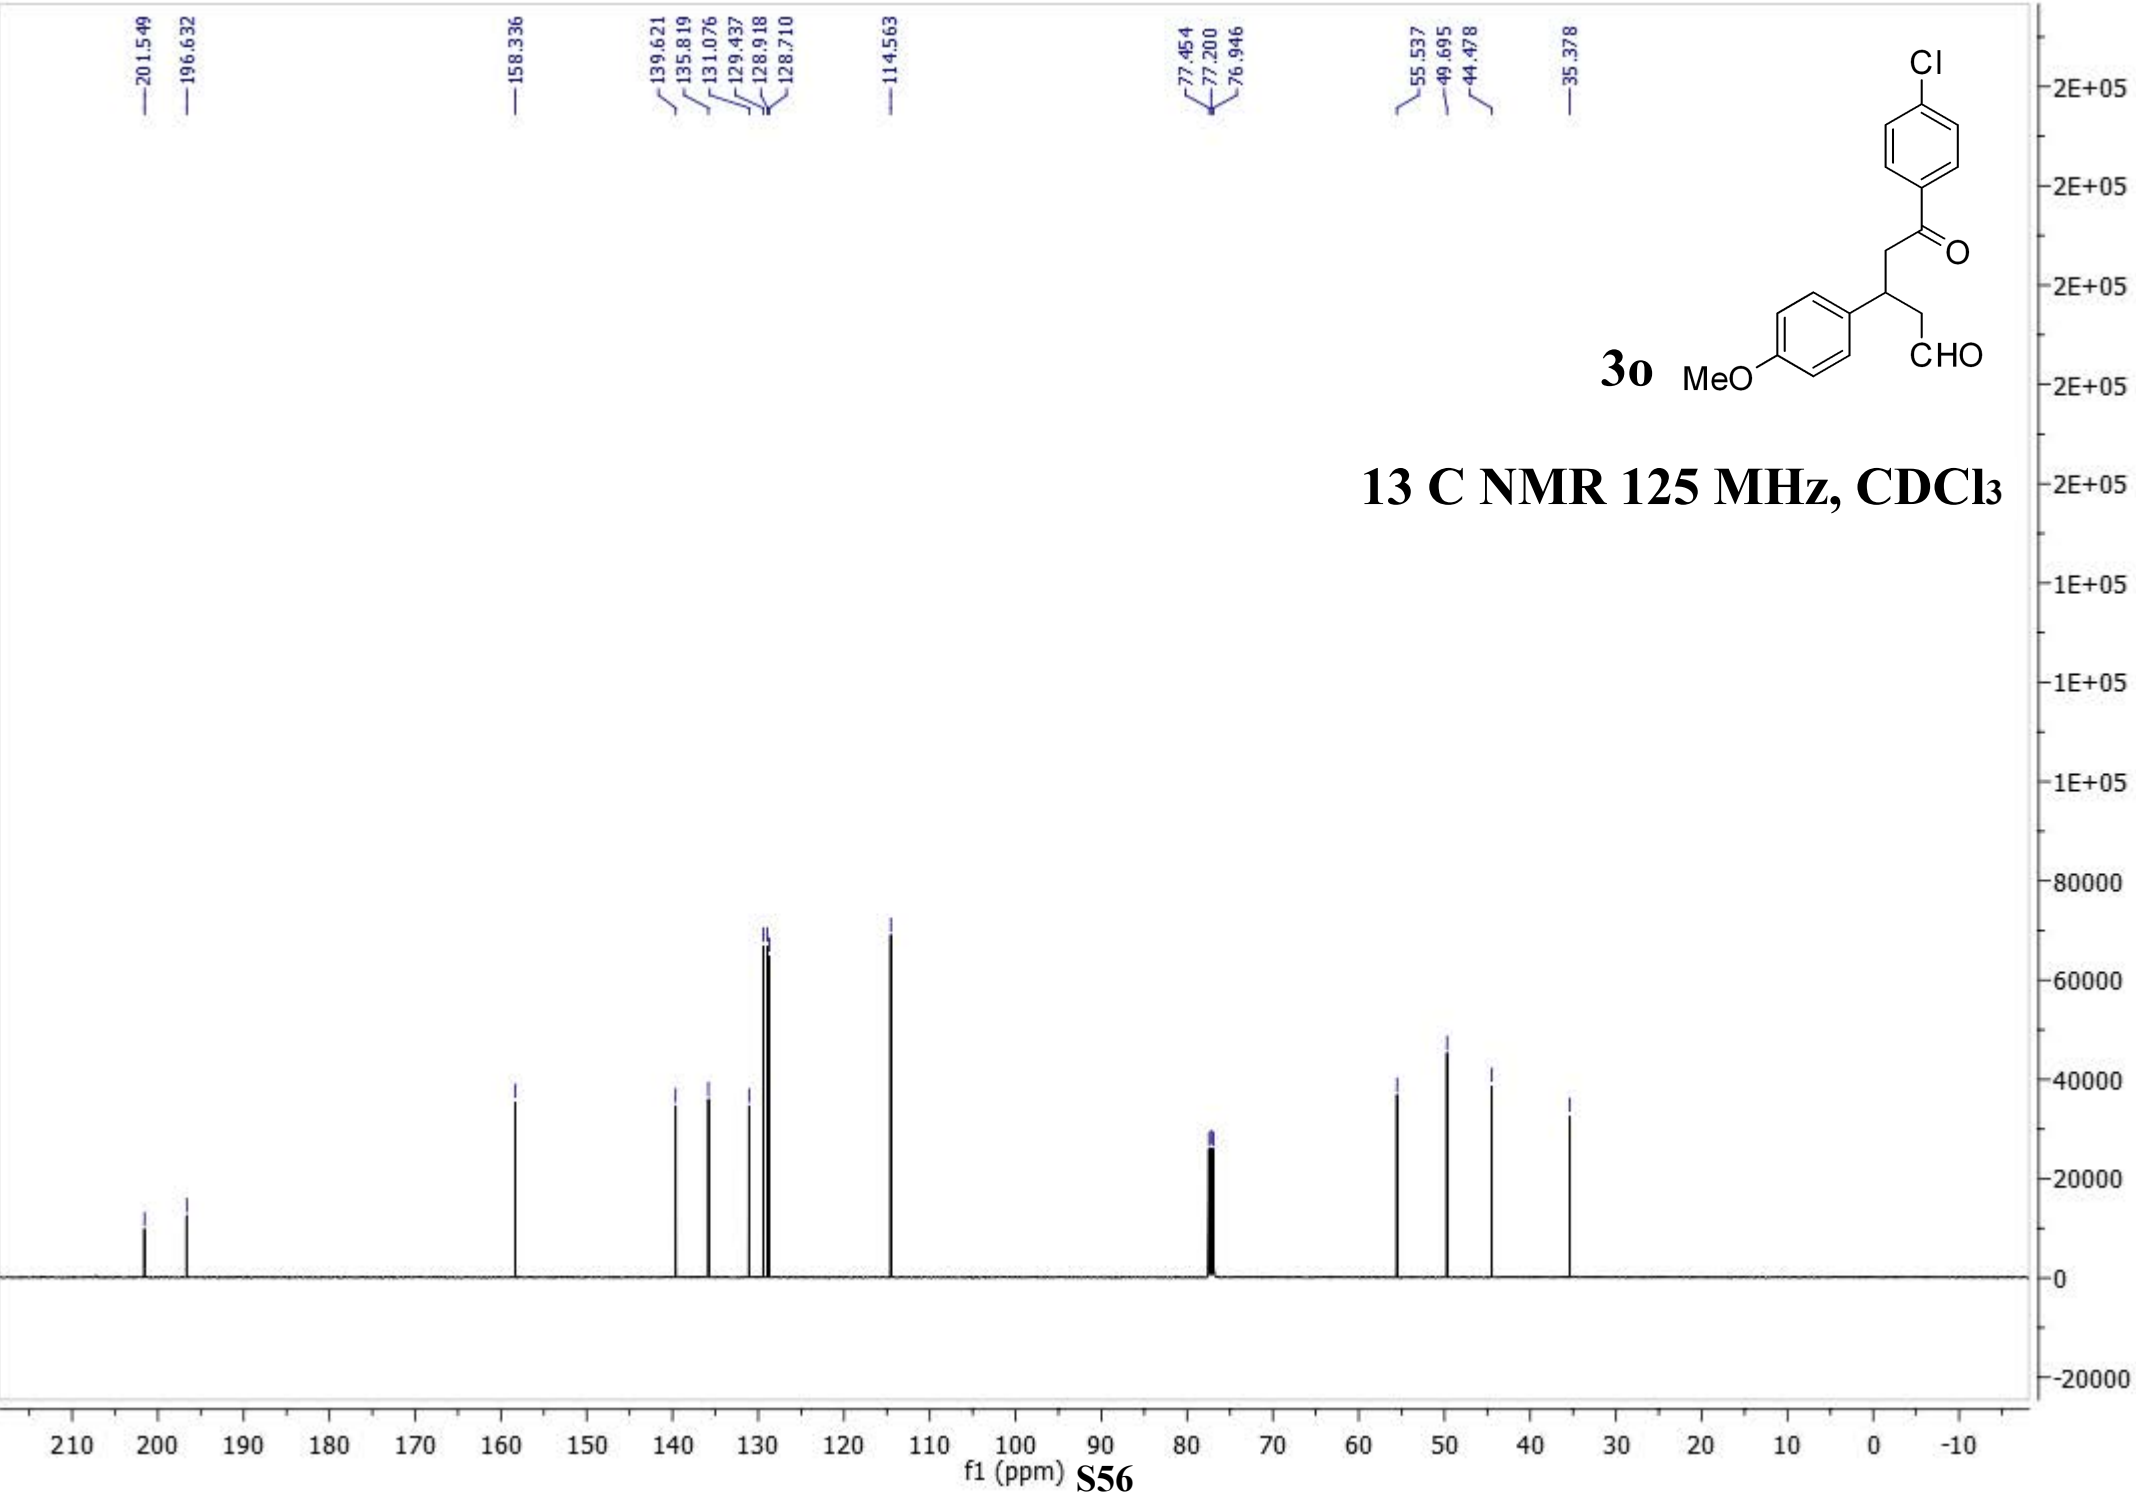



**3p**  
**<sup>13</sup>C NMR 125 MHz, CDCl<sub>3</sub>**

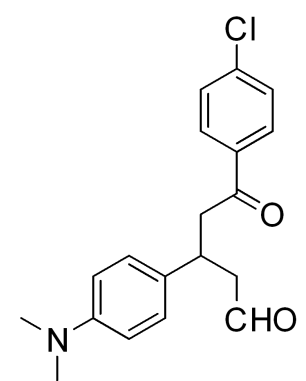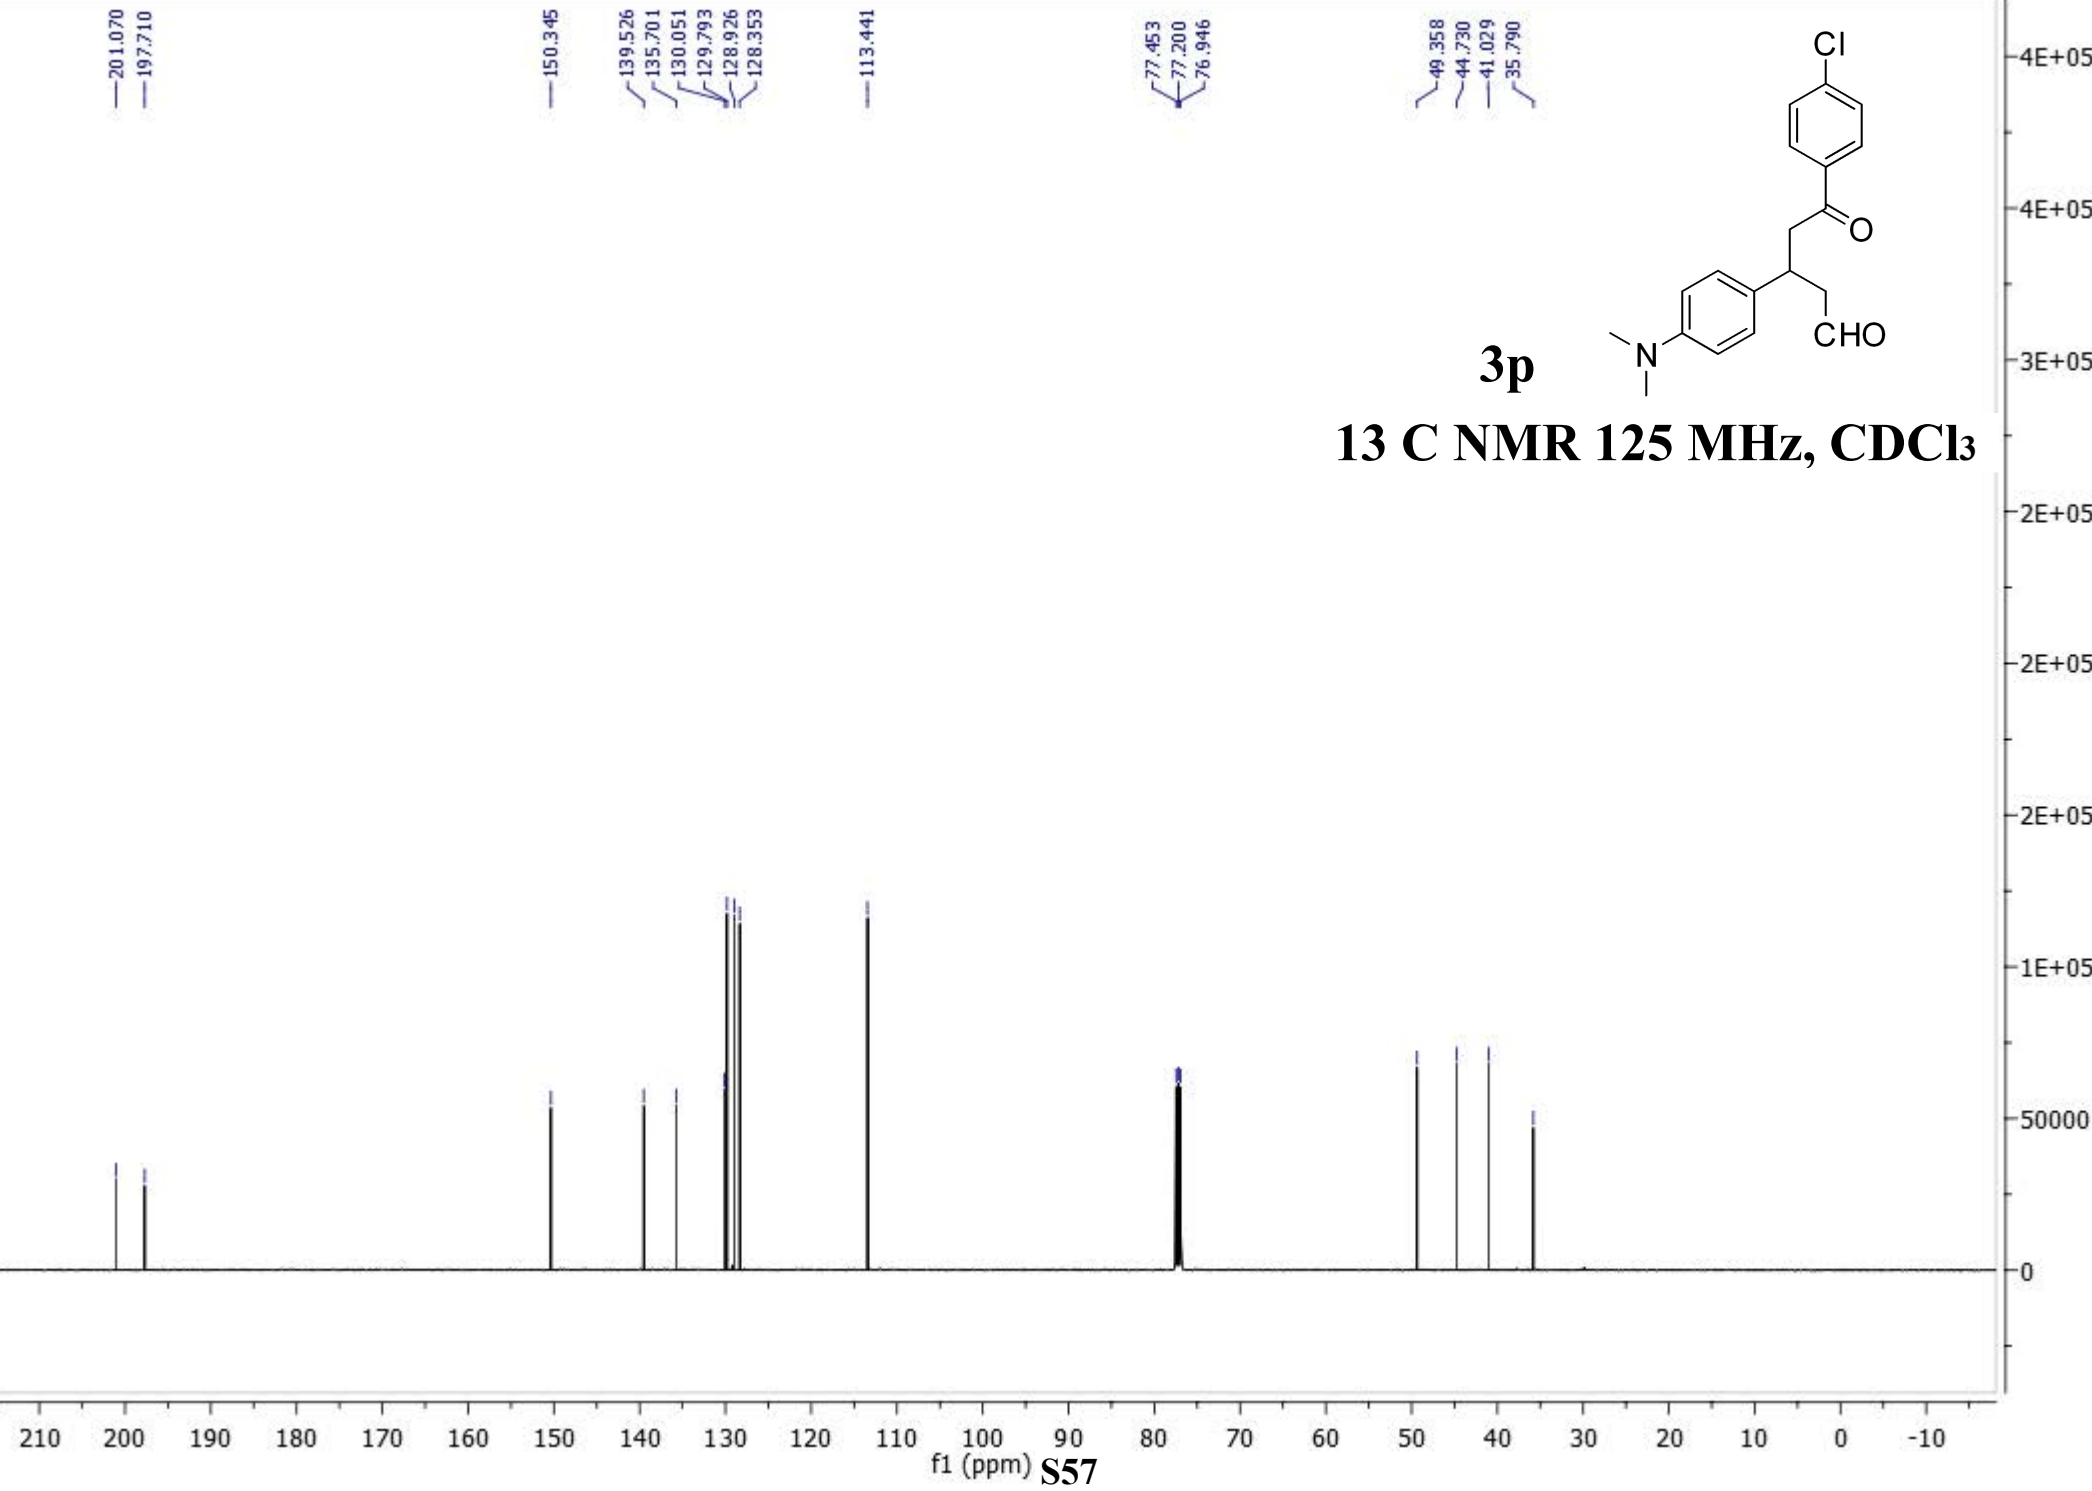

**3q**  
**<sup>13</sup>C NMR 125 MHz, CDCl<sub>3</sub>**

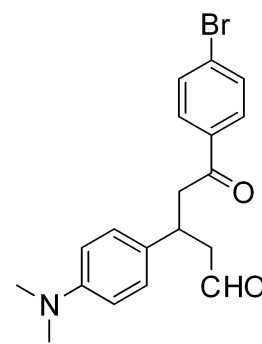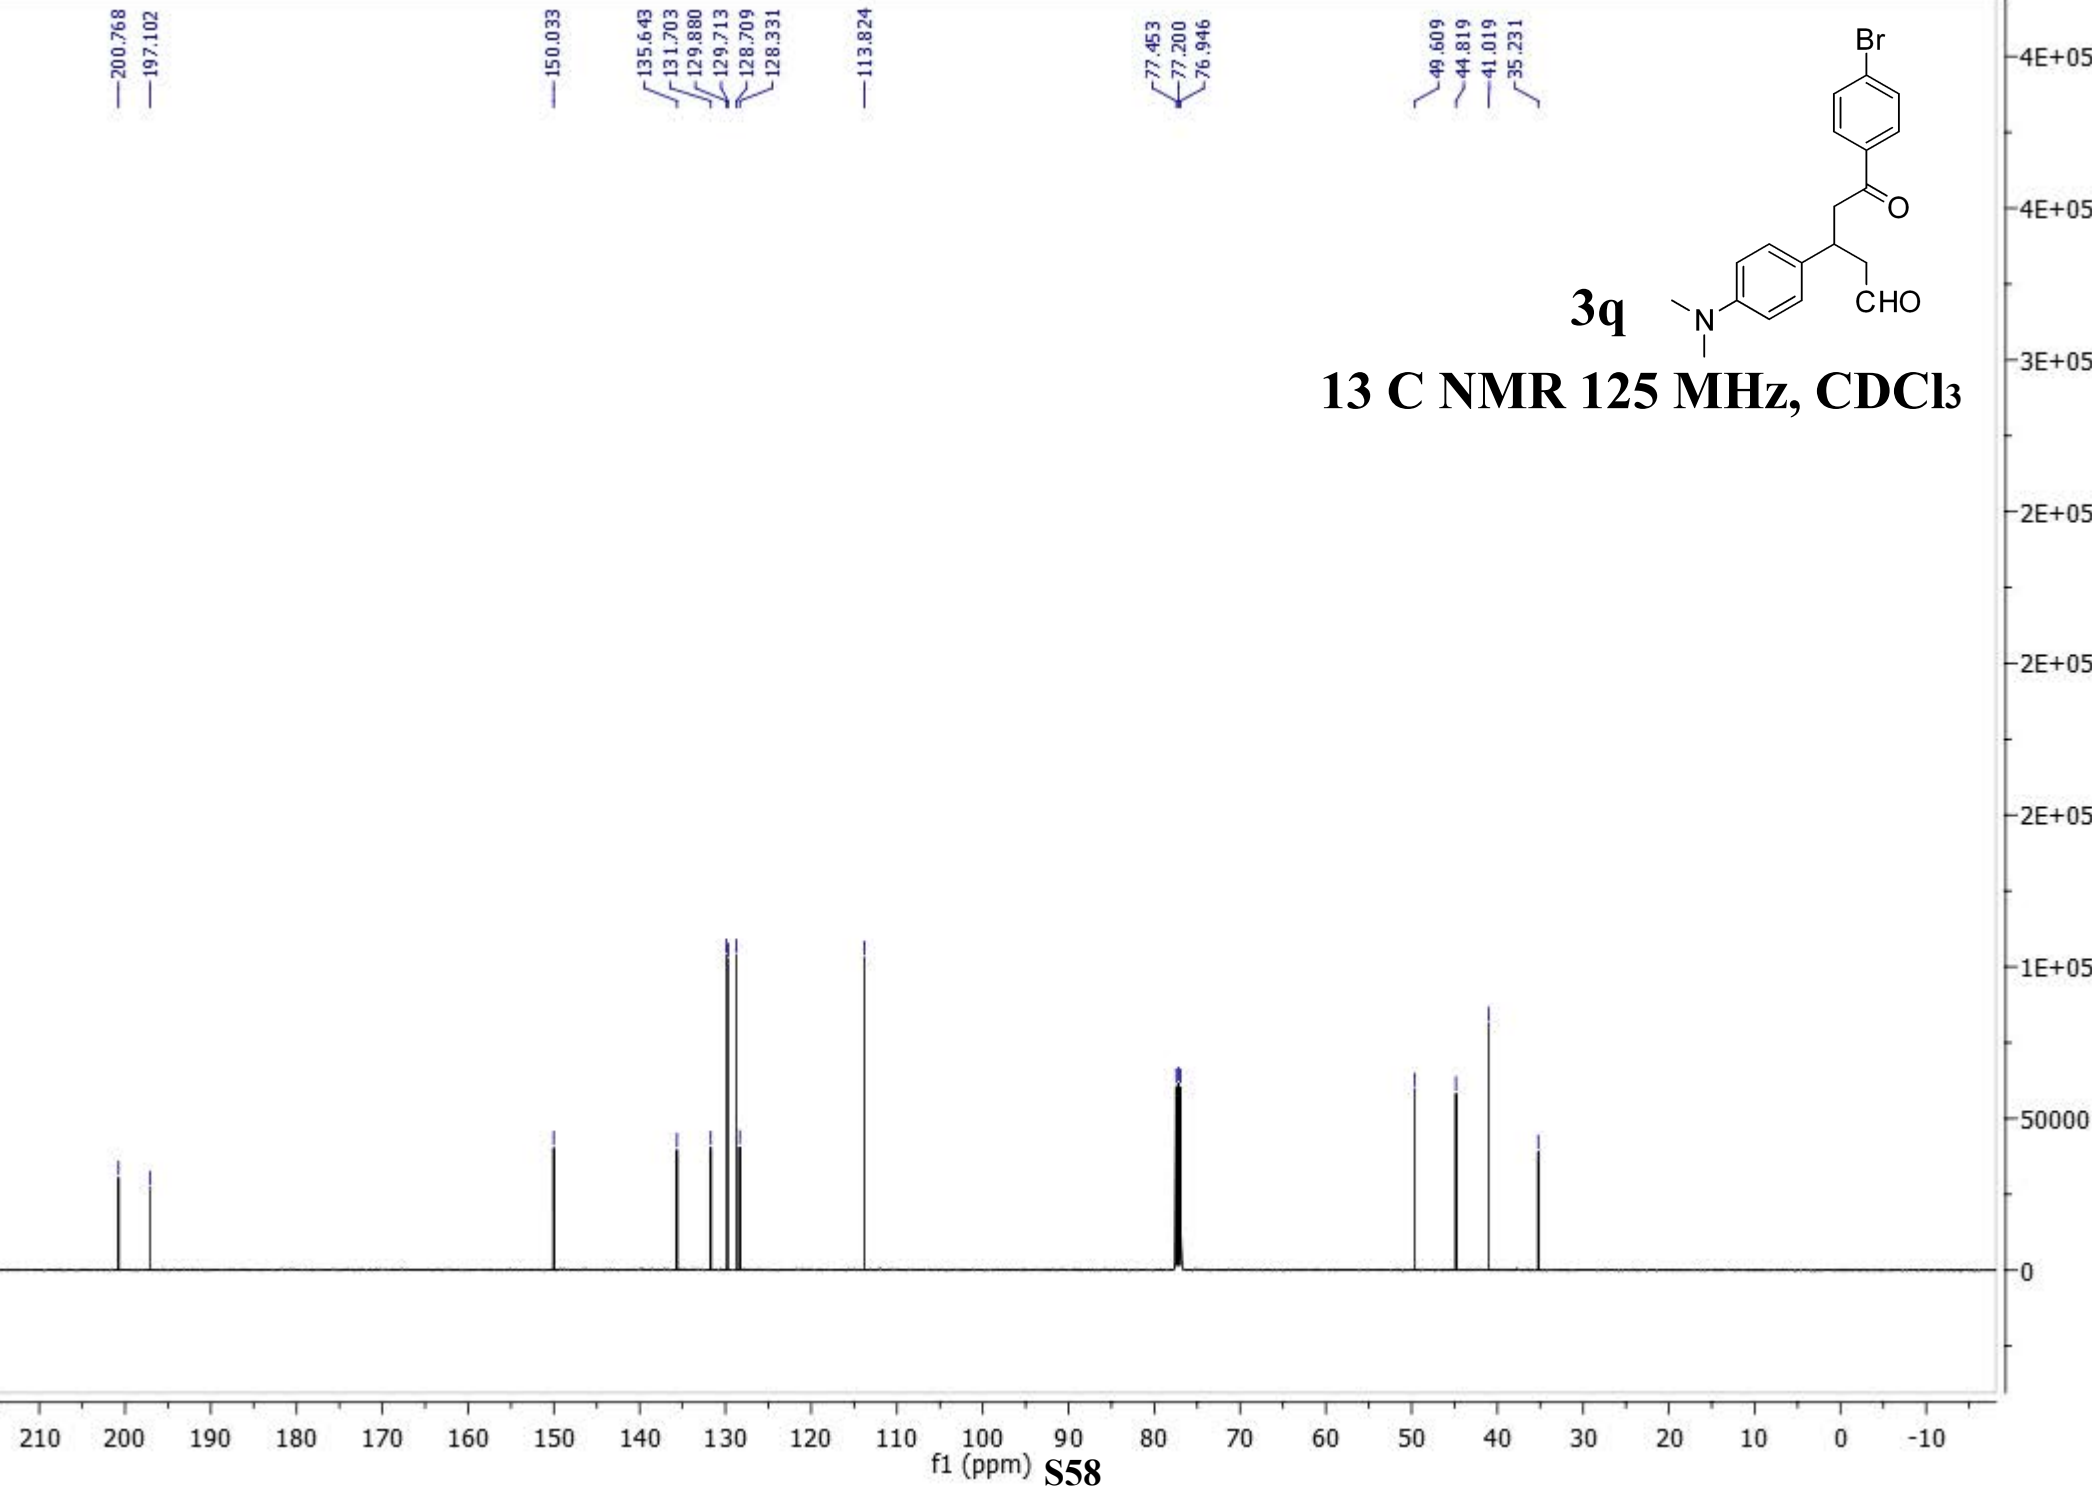

**3r**  
**<sup>13</sup>C NMR 125 MHz, CDCl<sub>3</sub>**

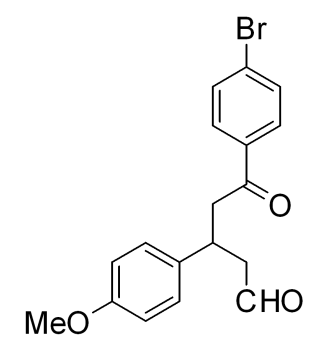

201.330  
196.361

158.398

135.914  
131.785  
131.283  
129.333  
128.348  
127.836

114.005

77.454  
77.200  
76.946

55.519

49.191

44.218

35.176

210 200 190 180 170 160 150 140 130 120 110 100 90 80 70 60 50 40 30 20 10 0 -10

f1 (ppm) S59

2E+05  
2E+05  
2E+05  
2E+05  
2E+05  
2E+05  
2E+05  
1E+05  
1E+05  
1E+05  
1E+05  
90000  
80000  
70000  
60000  
50000  
40000  
30000  
20000  
10000  
0  
-10000  
-20000

196.909

176.934

142.816

139.562

135.137

129.533

128.926

128.724

127.350

127.041

77.453

77.200

76.946

44.534

40.406

37.242

**3s**

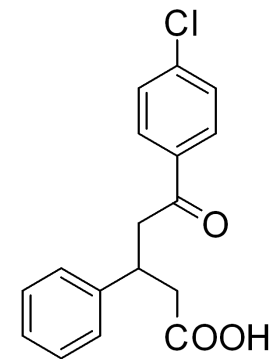

**13 C NMR 125 MHz, CDCl<sub>3</sub>**

210 200 190 180 170 160 150 140 130 120 110 100 90 80 70 60 50 40 30 20 10 0 -10

f1 (ppm) **S60**

2E+05  
2E+05  
2E+05  
2E+05  
2E+05  
2E+05  
2E+05  
2E+05  
2E+05  
1E+05  
1E+05  
1E+05  
1E+05  
1E+05  
90000  
80000  
70000  
60000  
50000  
40000  
30000  
20000  
10000  
0  
-10000  
-20000

**3t**

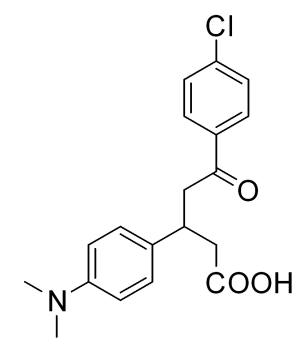

**$^{13}\text{C}$  NMR 125 MHz,  $\text{CDCl}_3$**

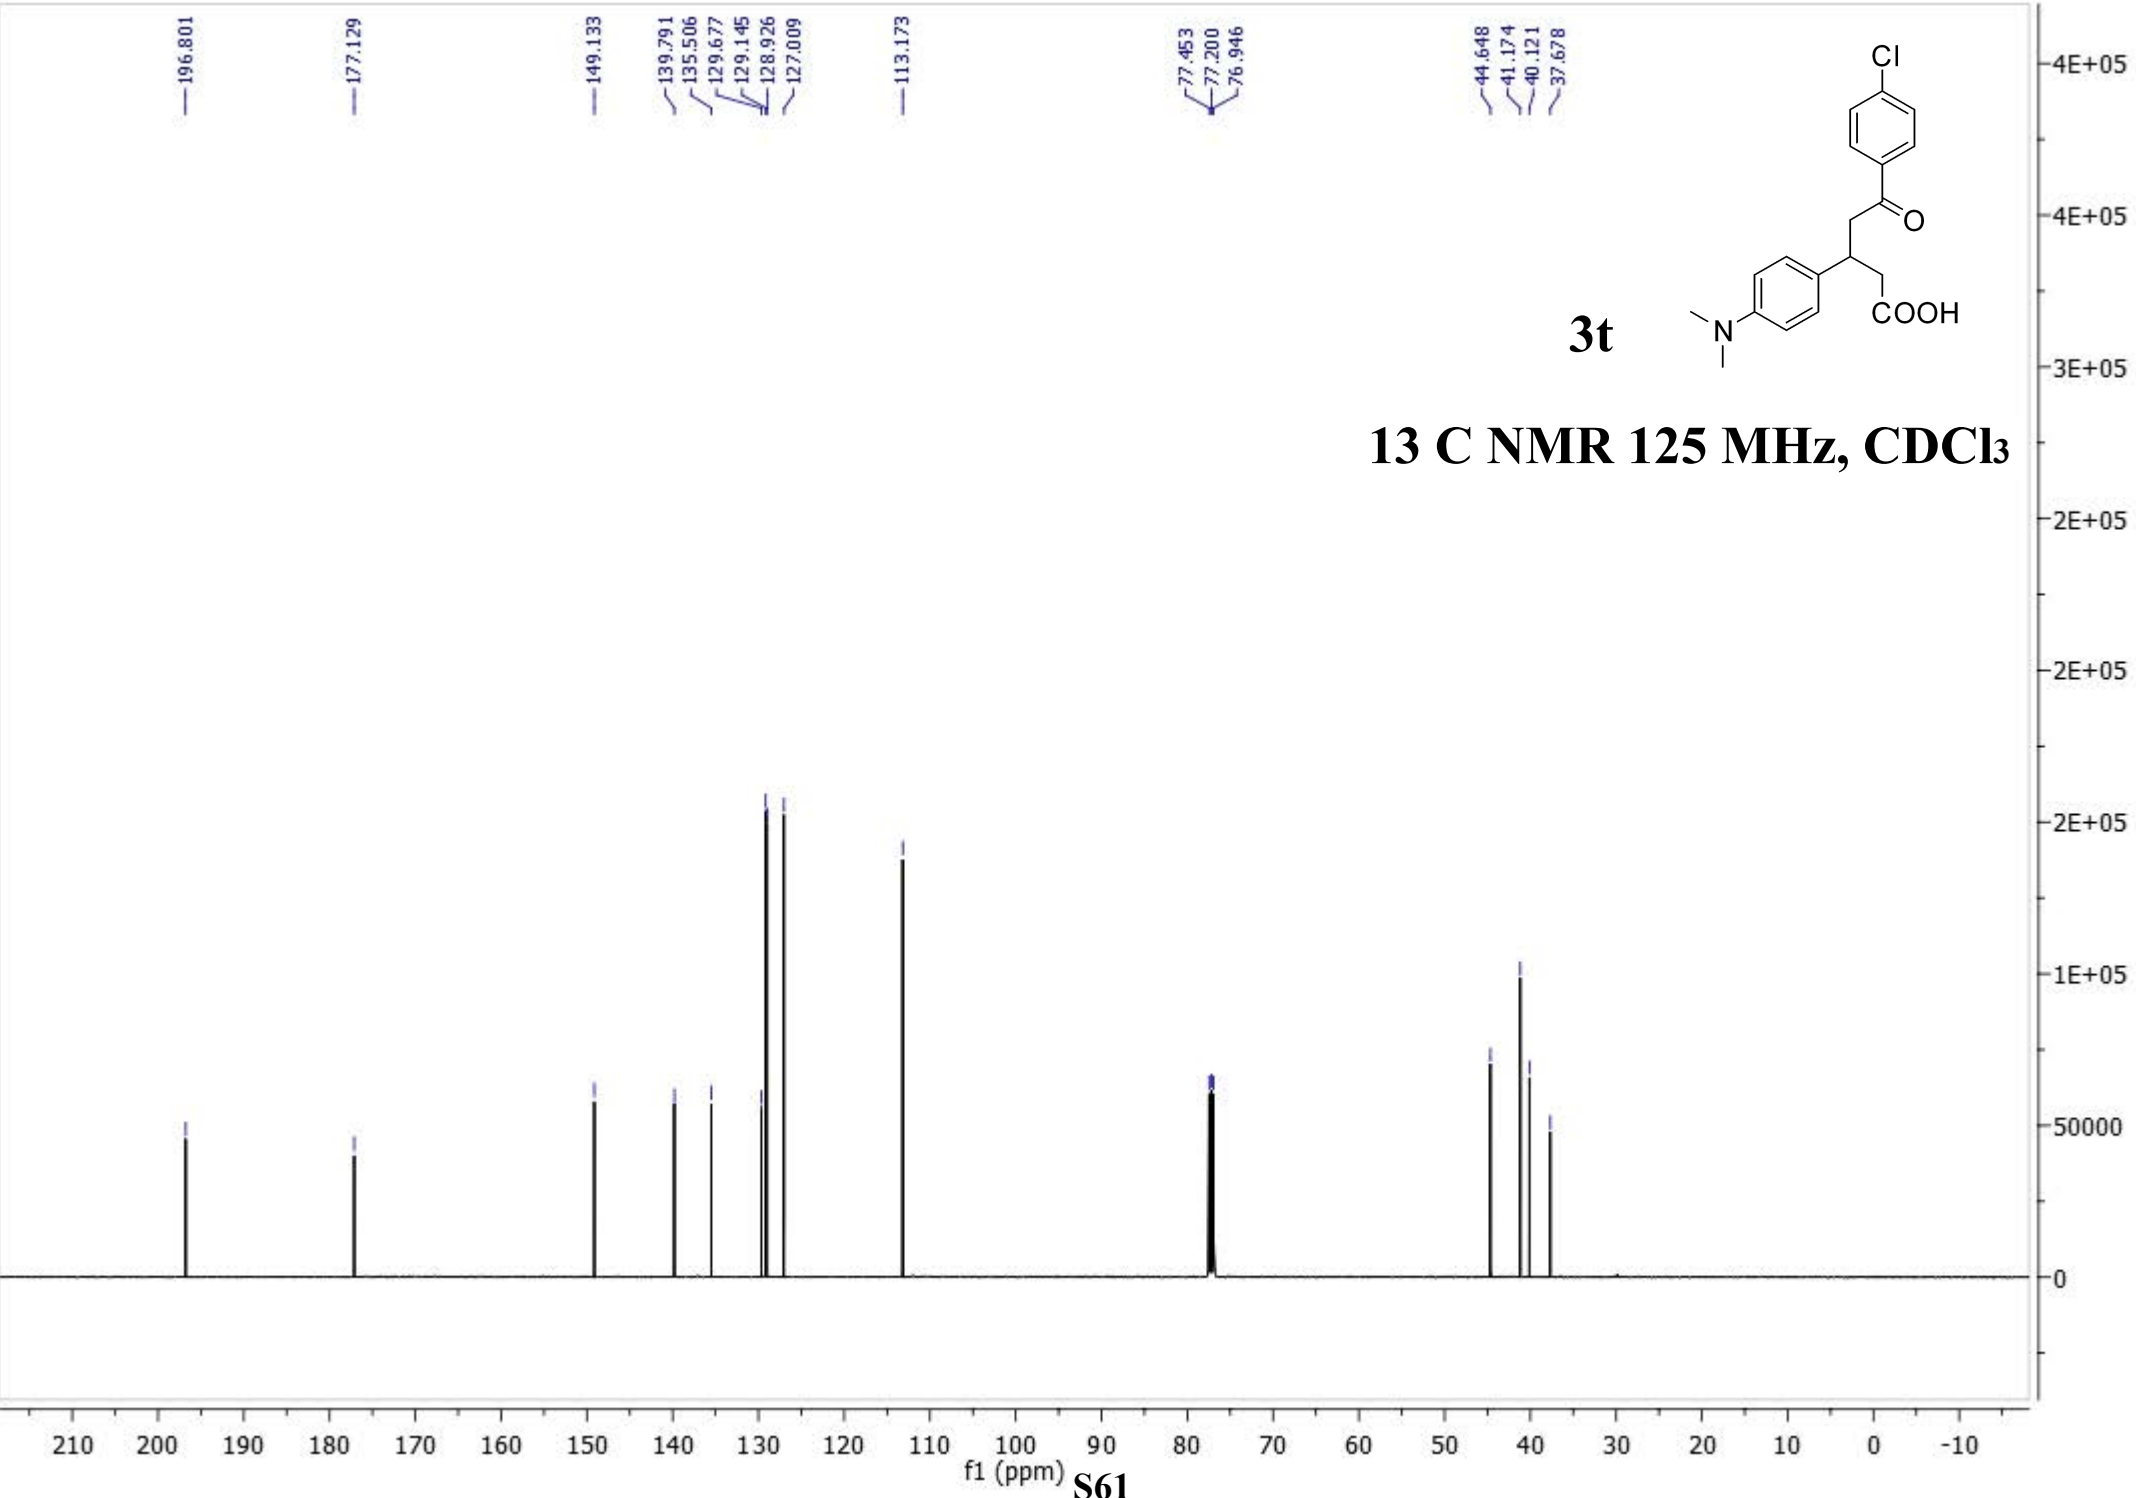

S61

**3u**

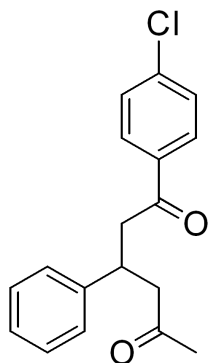

**<sup>1</sup>C NMR 125 MHz, CDCl<sub>3</sub>**

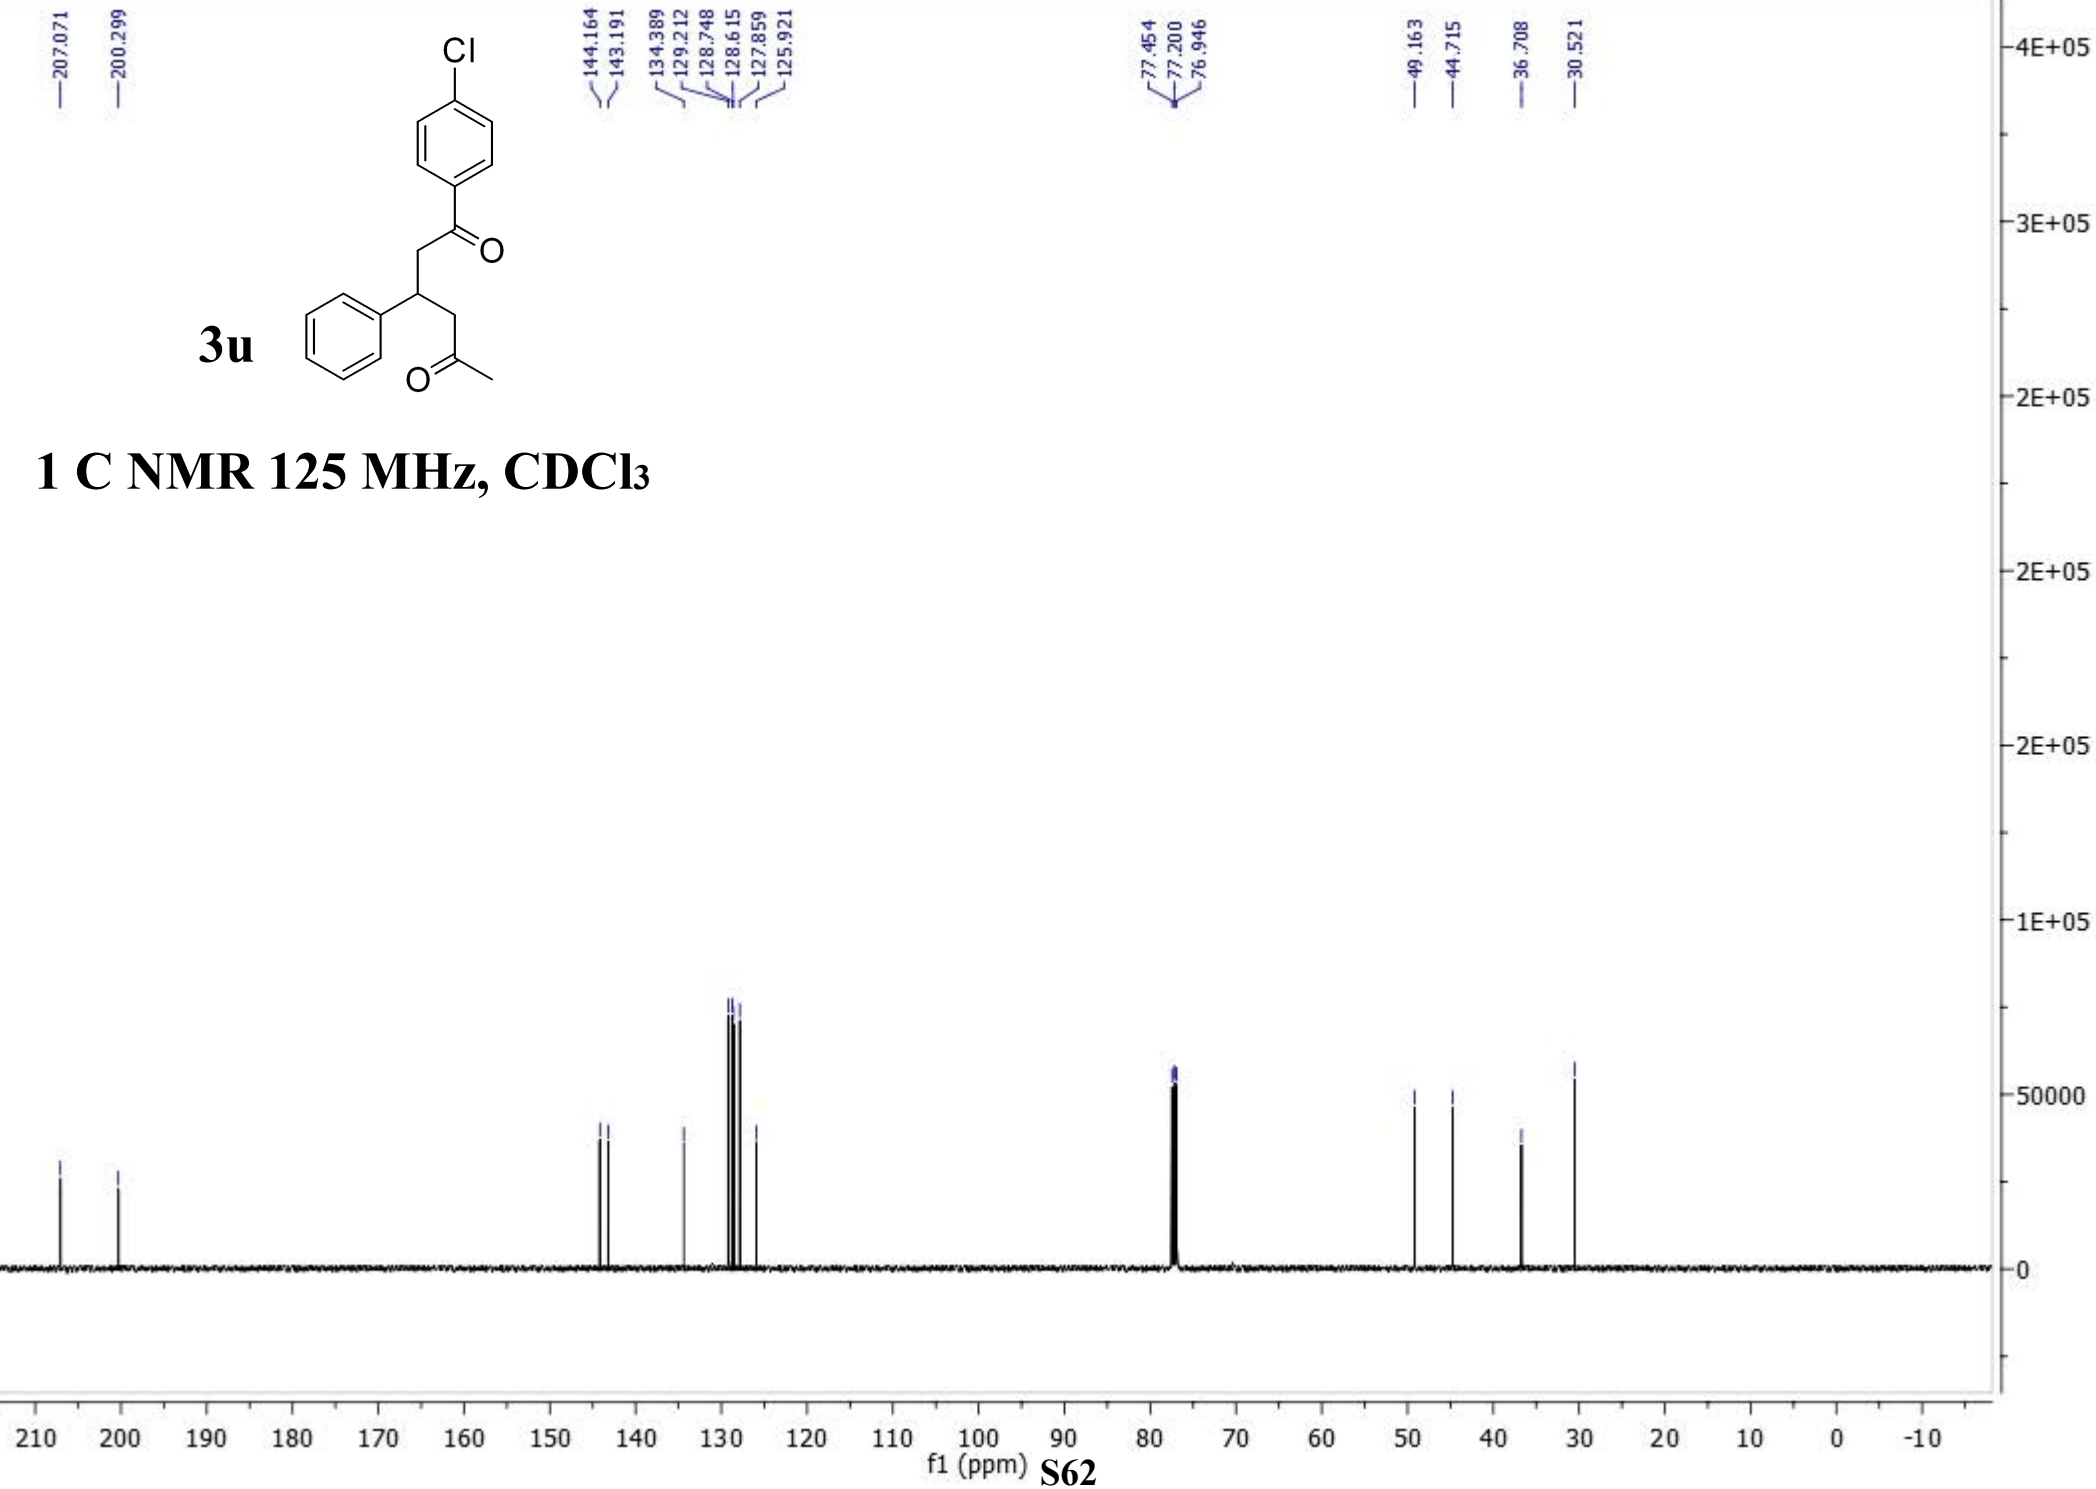

202.345  
199.293

139.036  
134.834  
129.810  
128.602

77.454  
77.200  
76.946

50.689  
44.948

24.702  
20.612

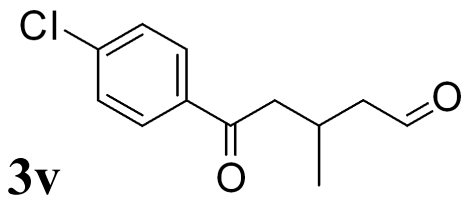

### 13 C NMR 125 MHz, CDCl<sub>3</sub>

210 200 190 180 170 160 150 140 130 120 110 100 90 80 70 60 50 40 30 20 10 0 -10

f1 (ppm) S63

3E+05  
3E+05  
3E+05  
2E+05  
2E+05  
2E+05  
1E+05  
1E+05  
1E+05  
80000  
60000  
40000  
20000  
0  
-20000

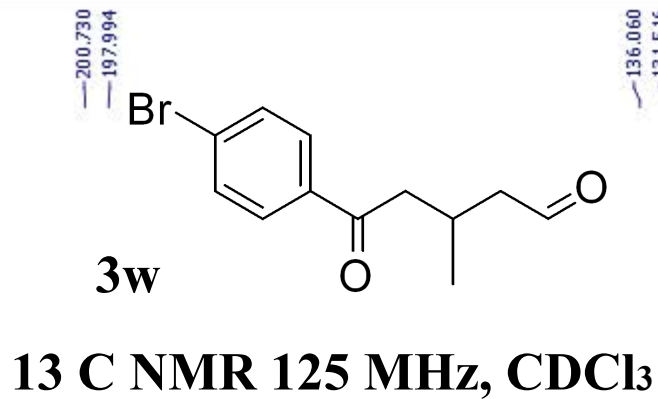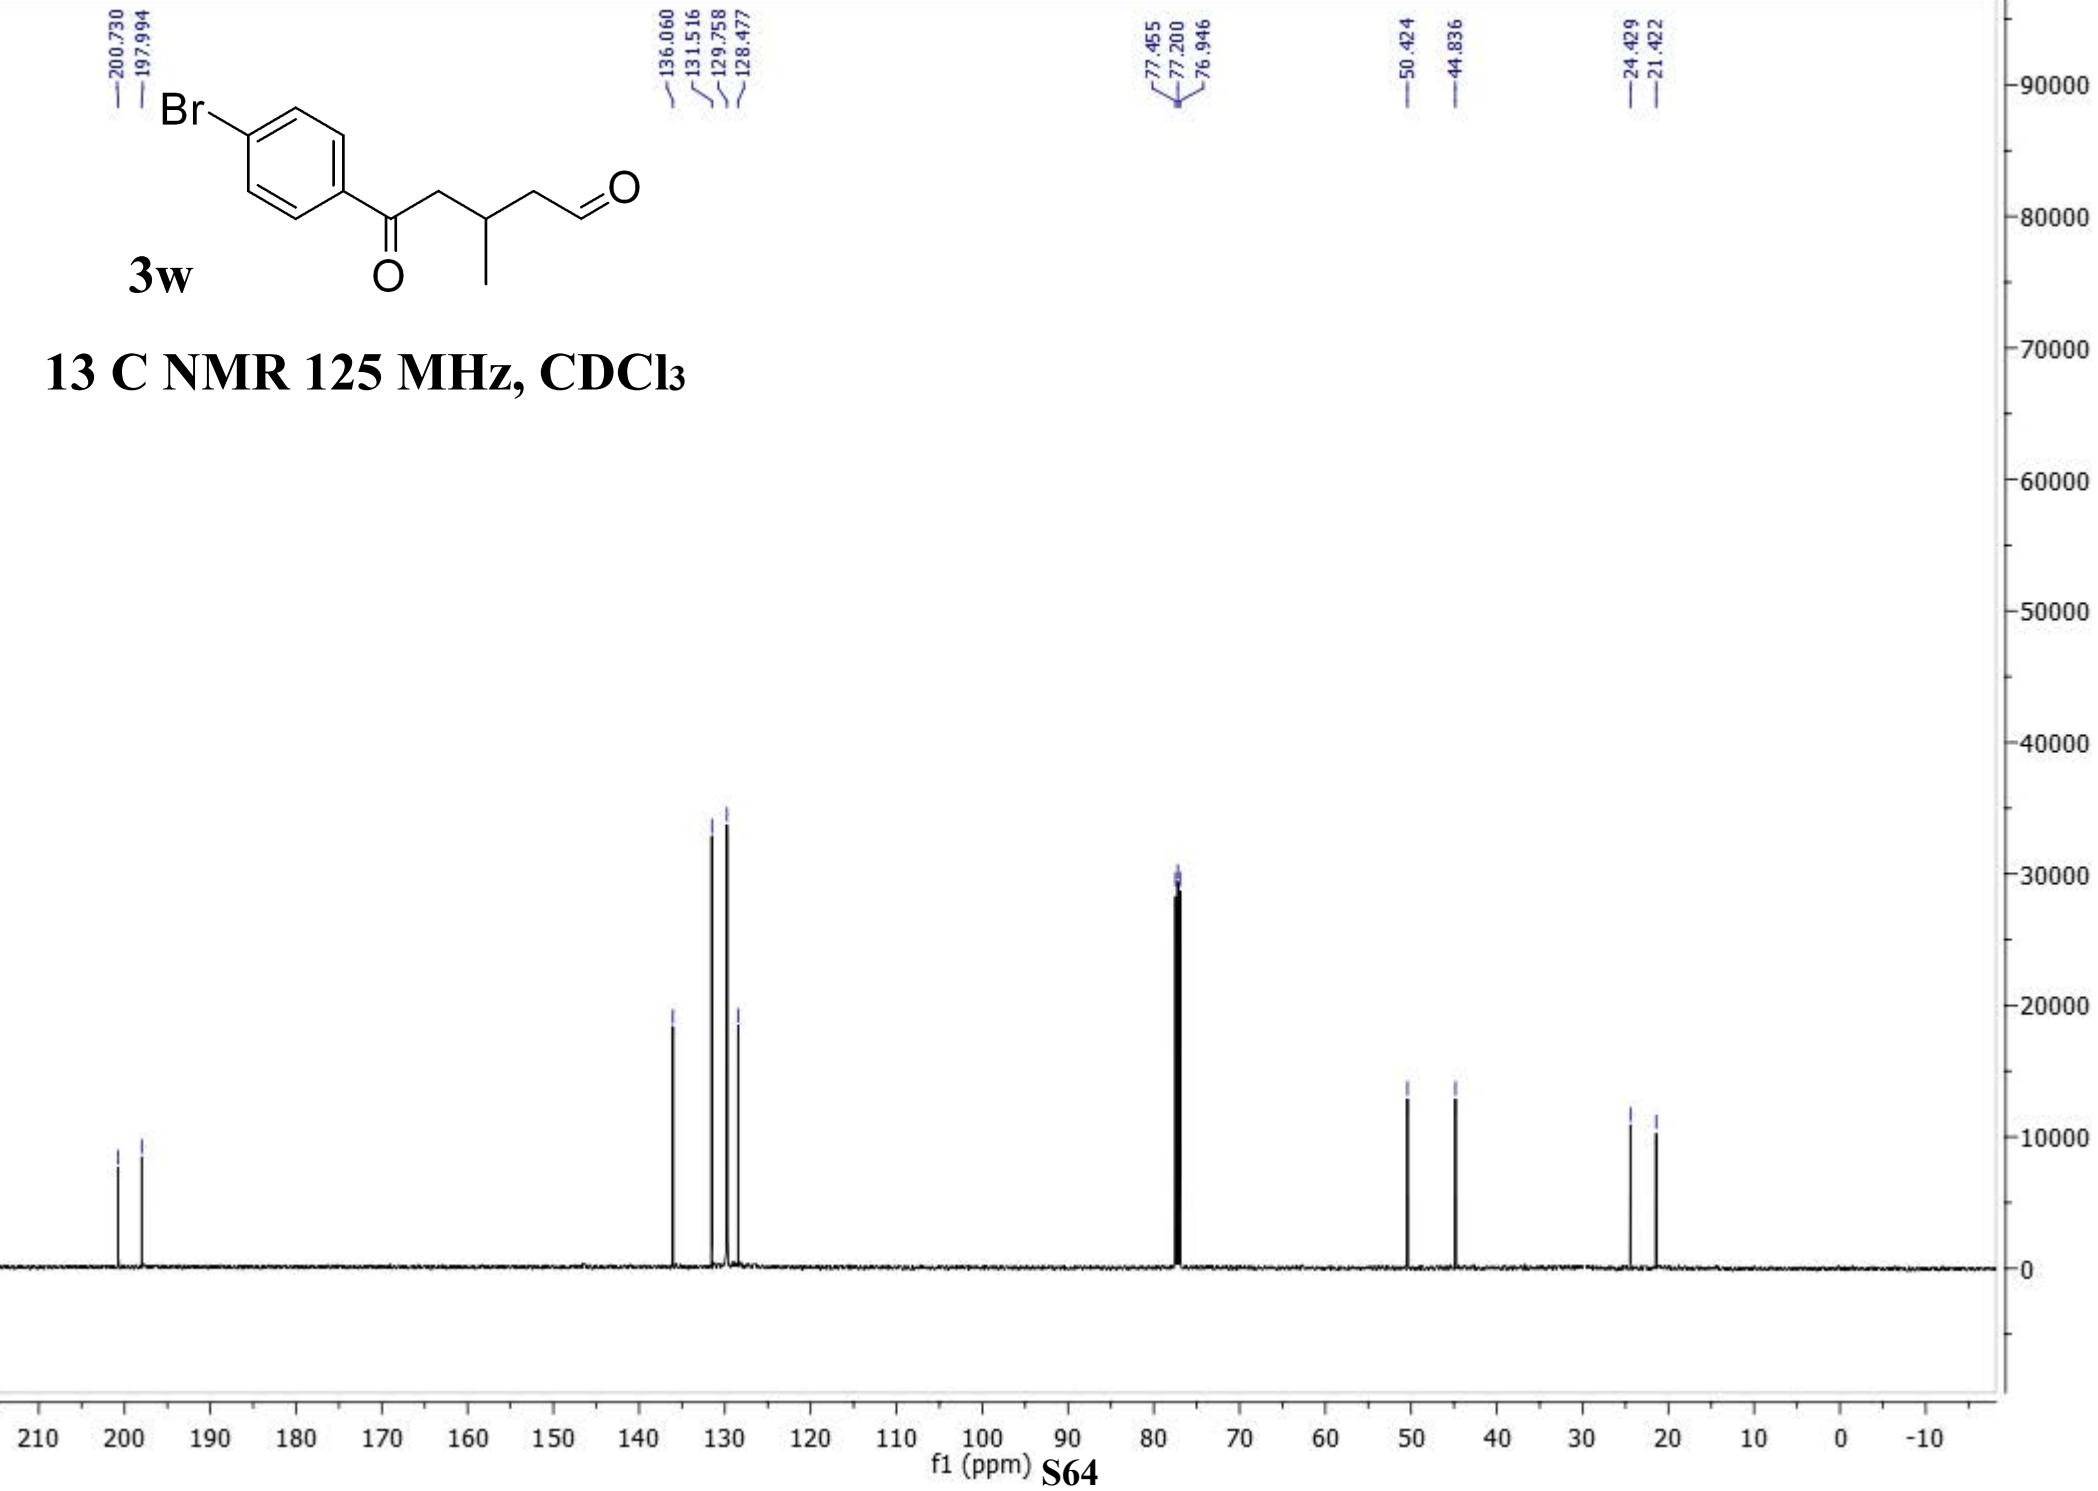



# VI. <sup>1</sup>H NMR Spectra 5a -5q

**5a**

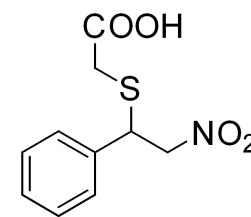

**<sup>1</sup>H NMR 500 MHz, CDCl<sub>3</sub>**

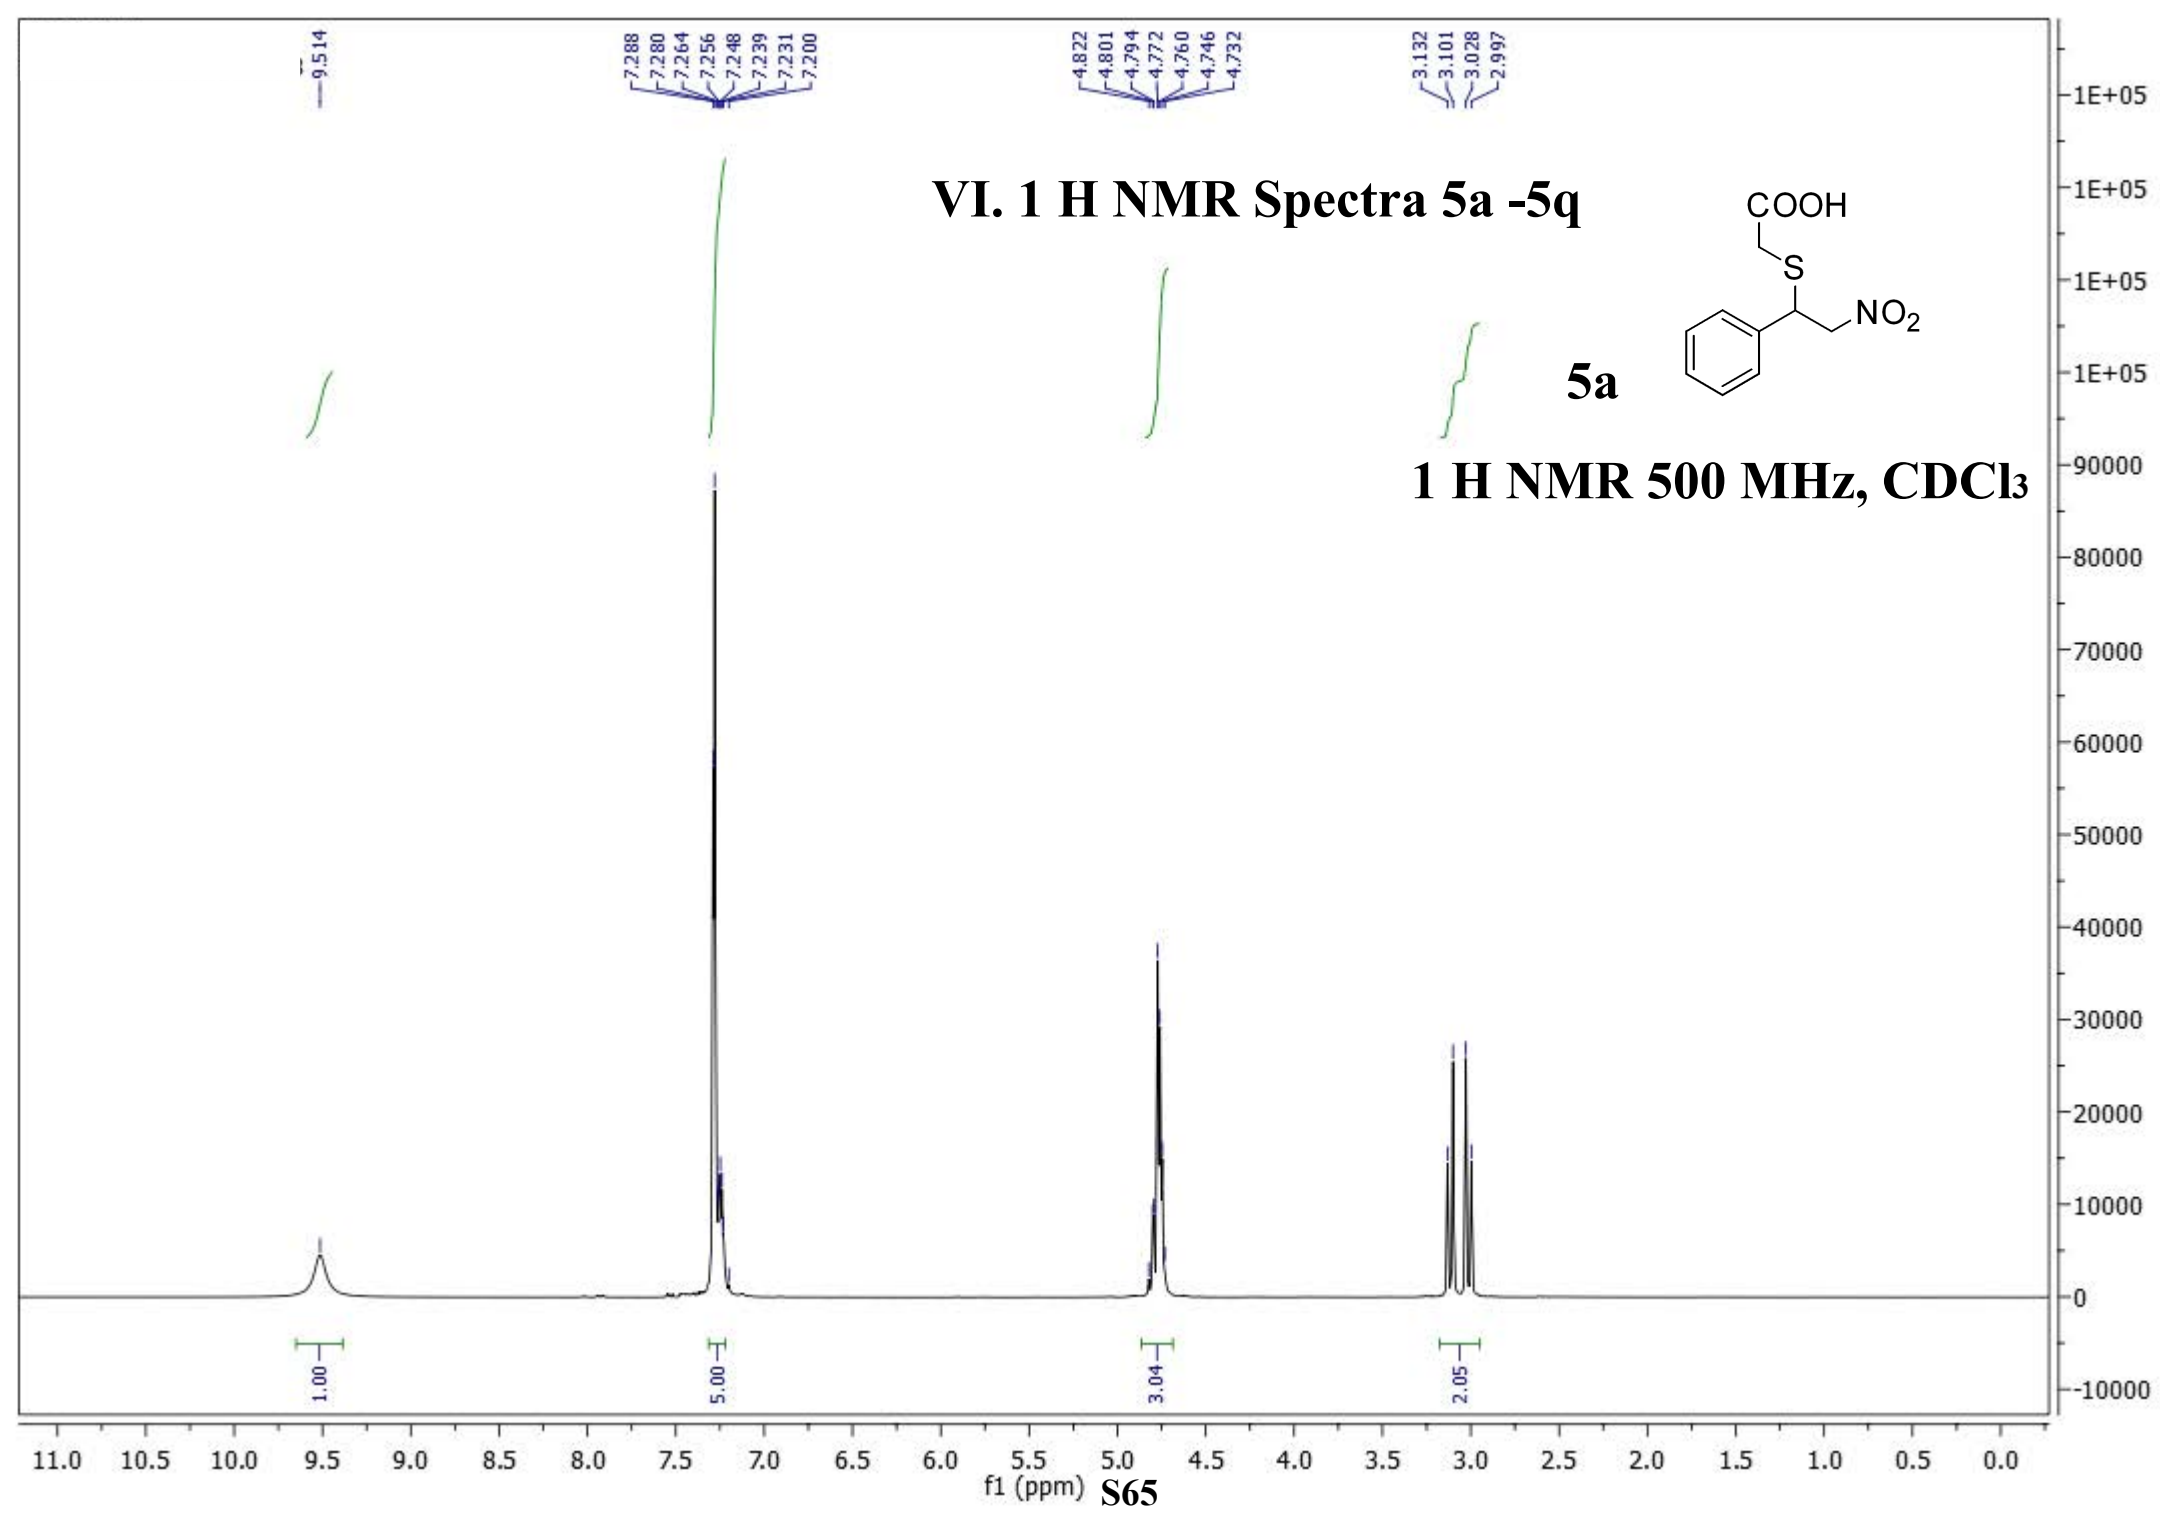

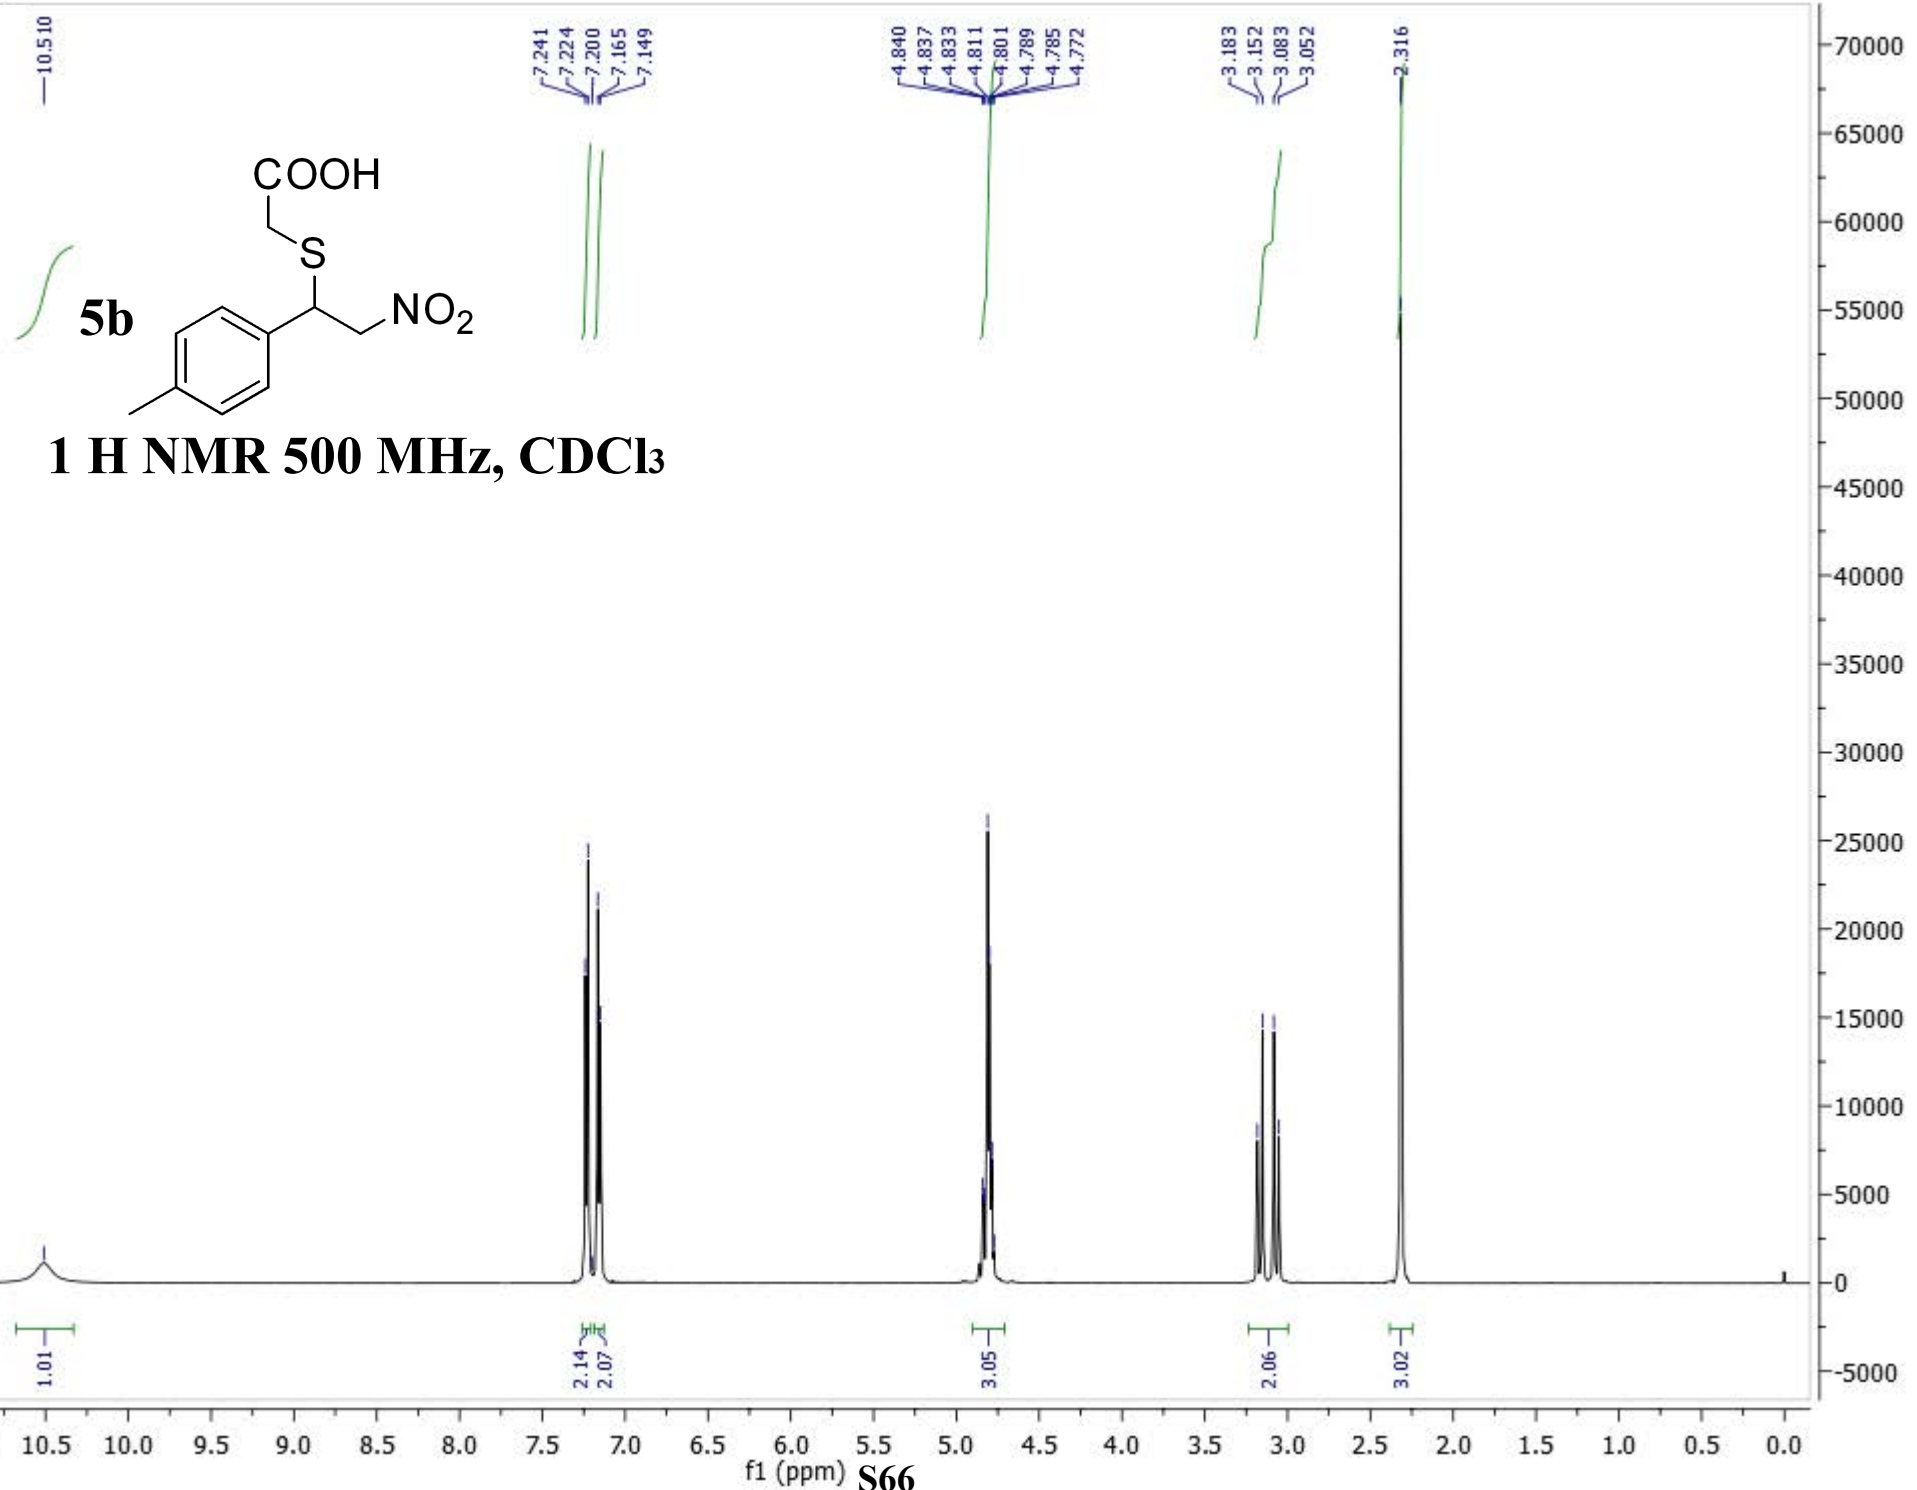

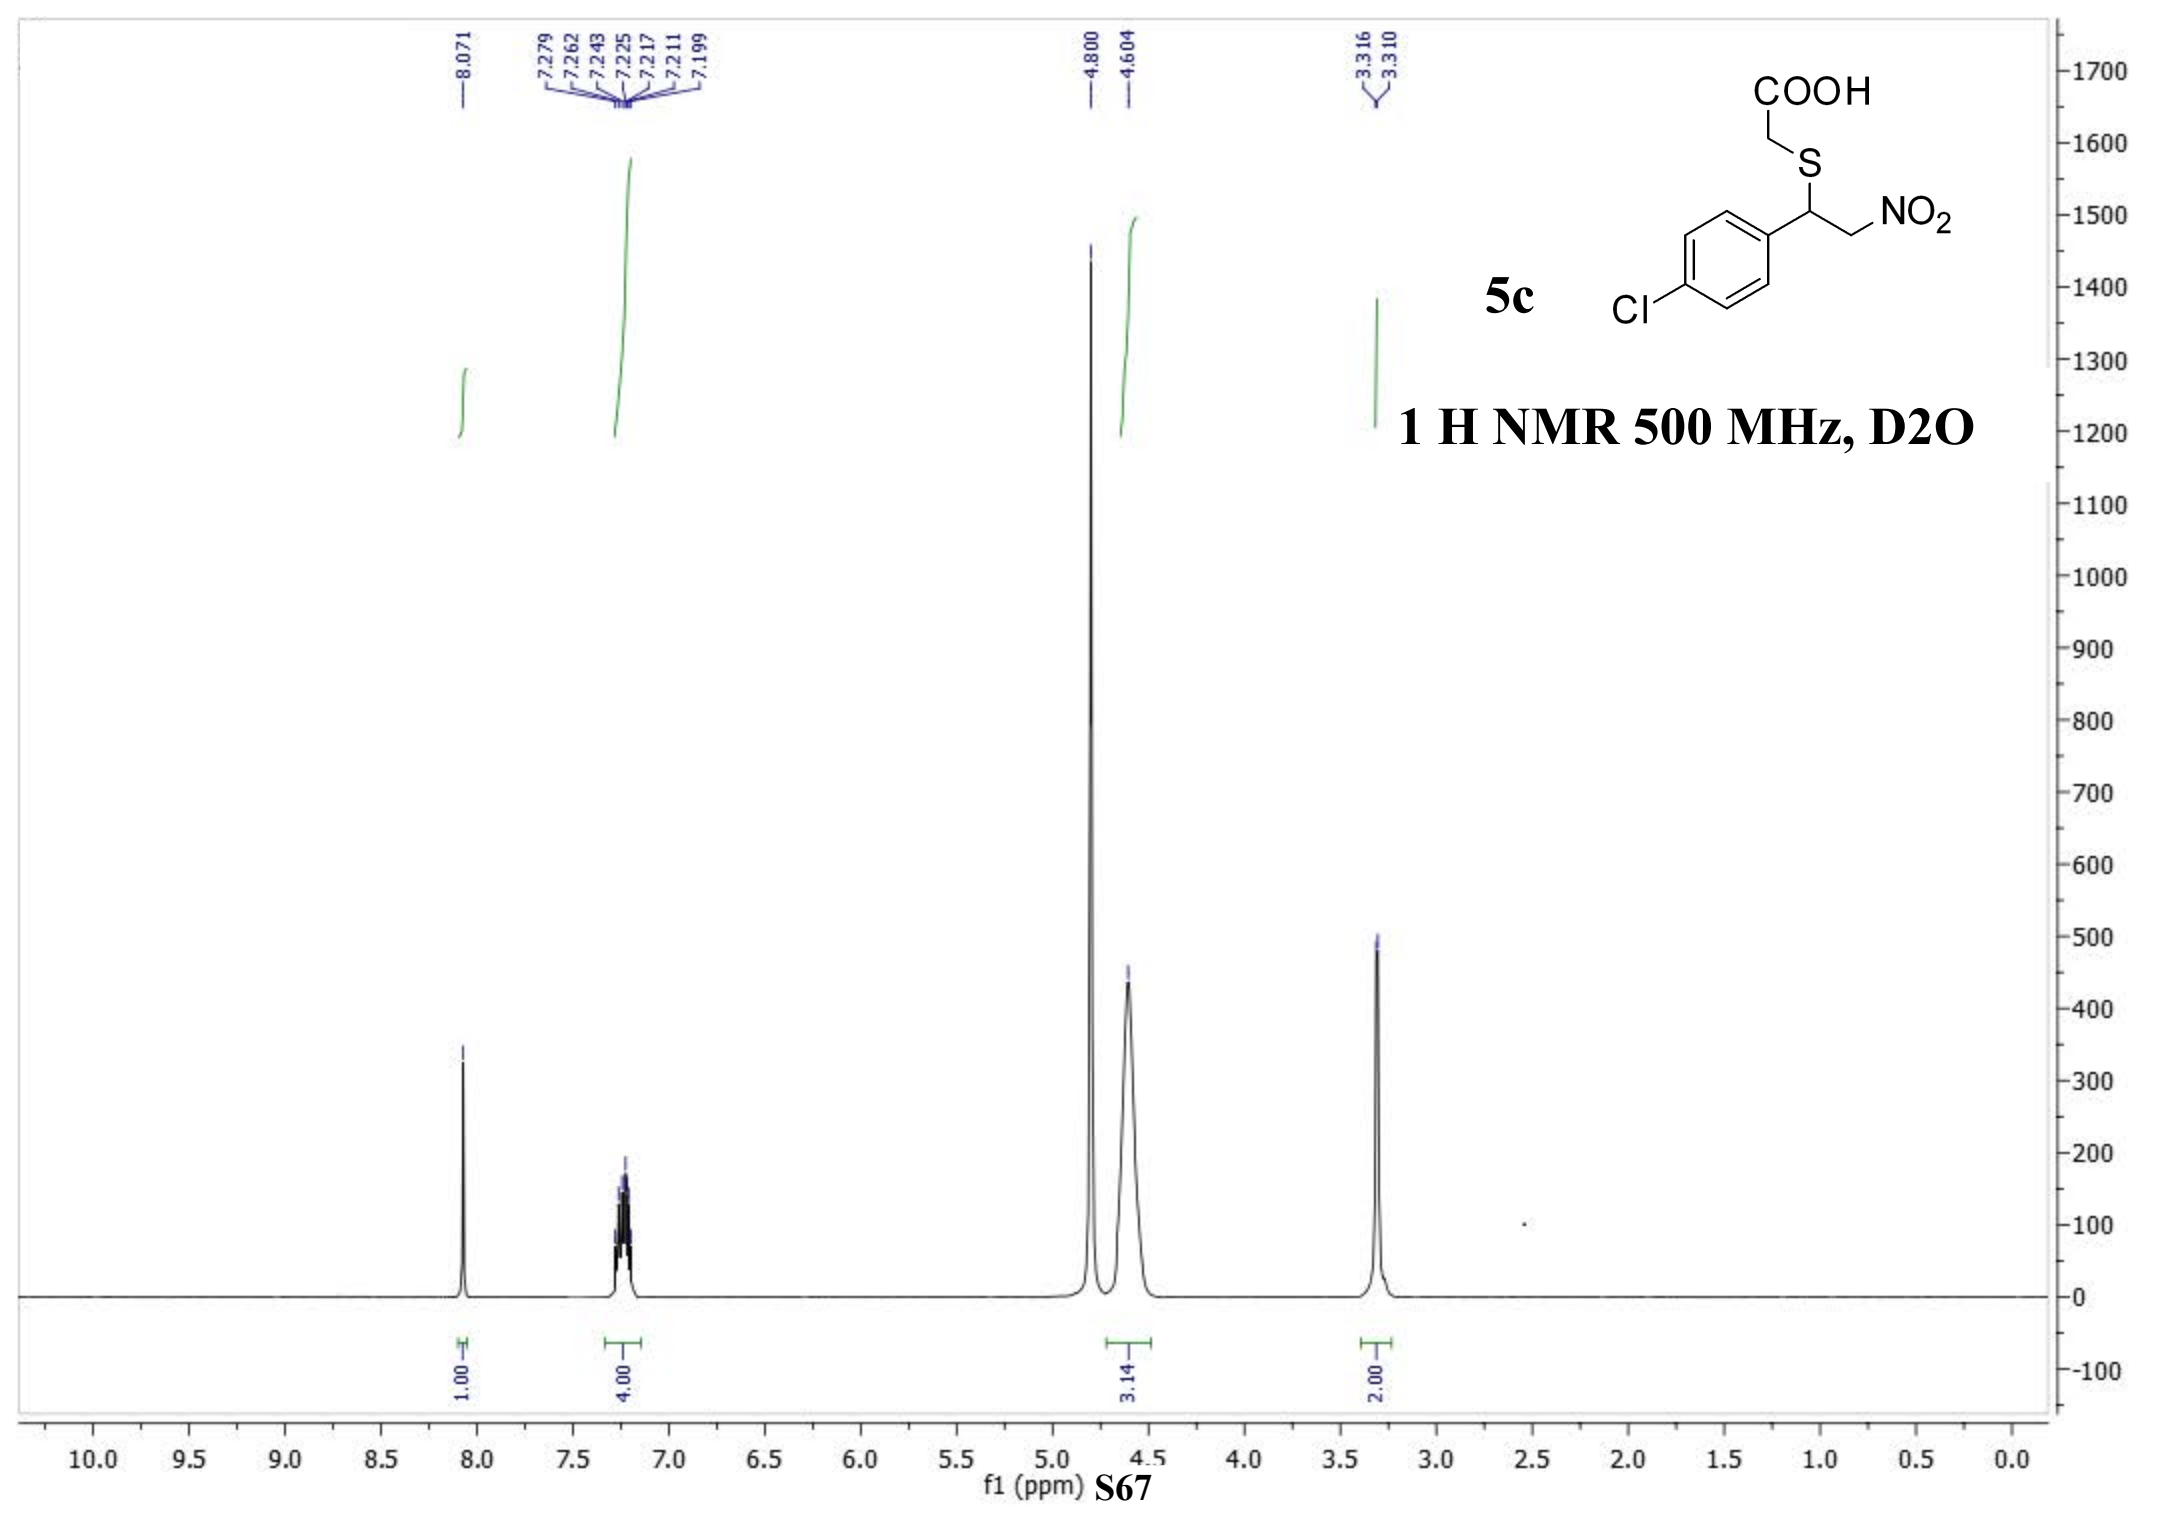

**5d**

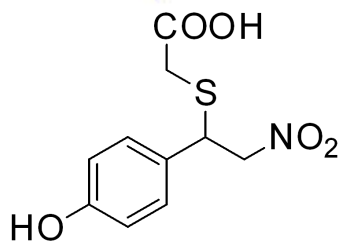

**<sup>1</sup>H NMR 500 MHz, D<sub>2</sub>O**

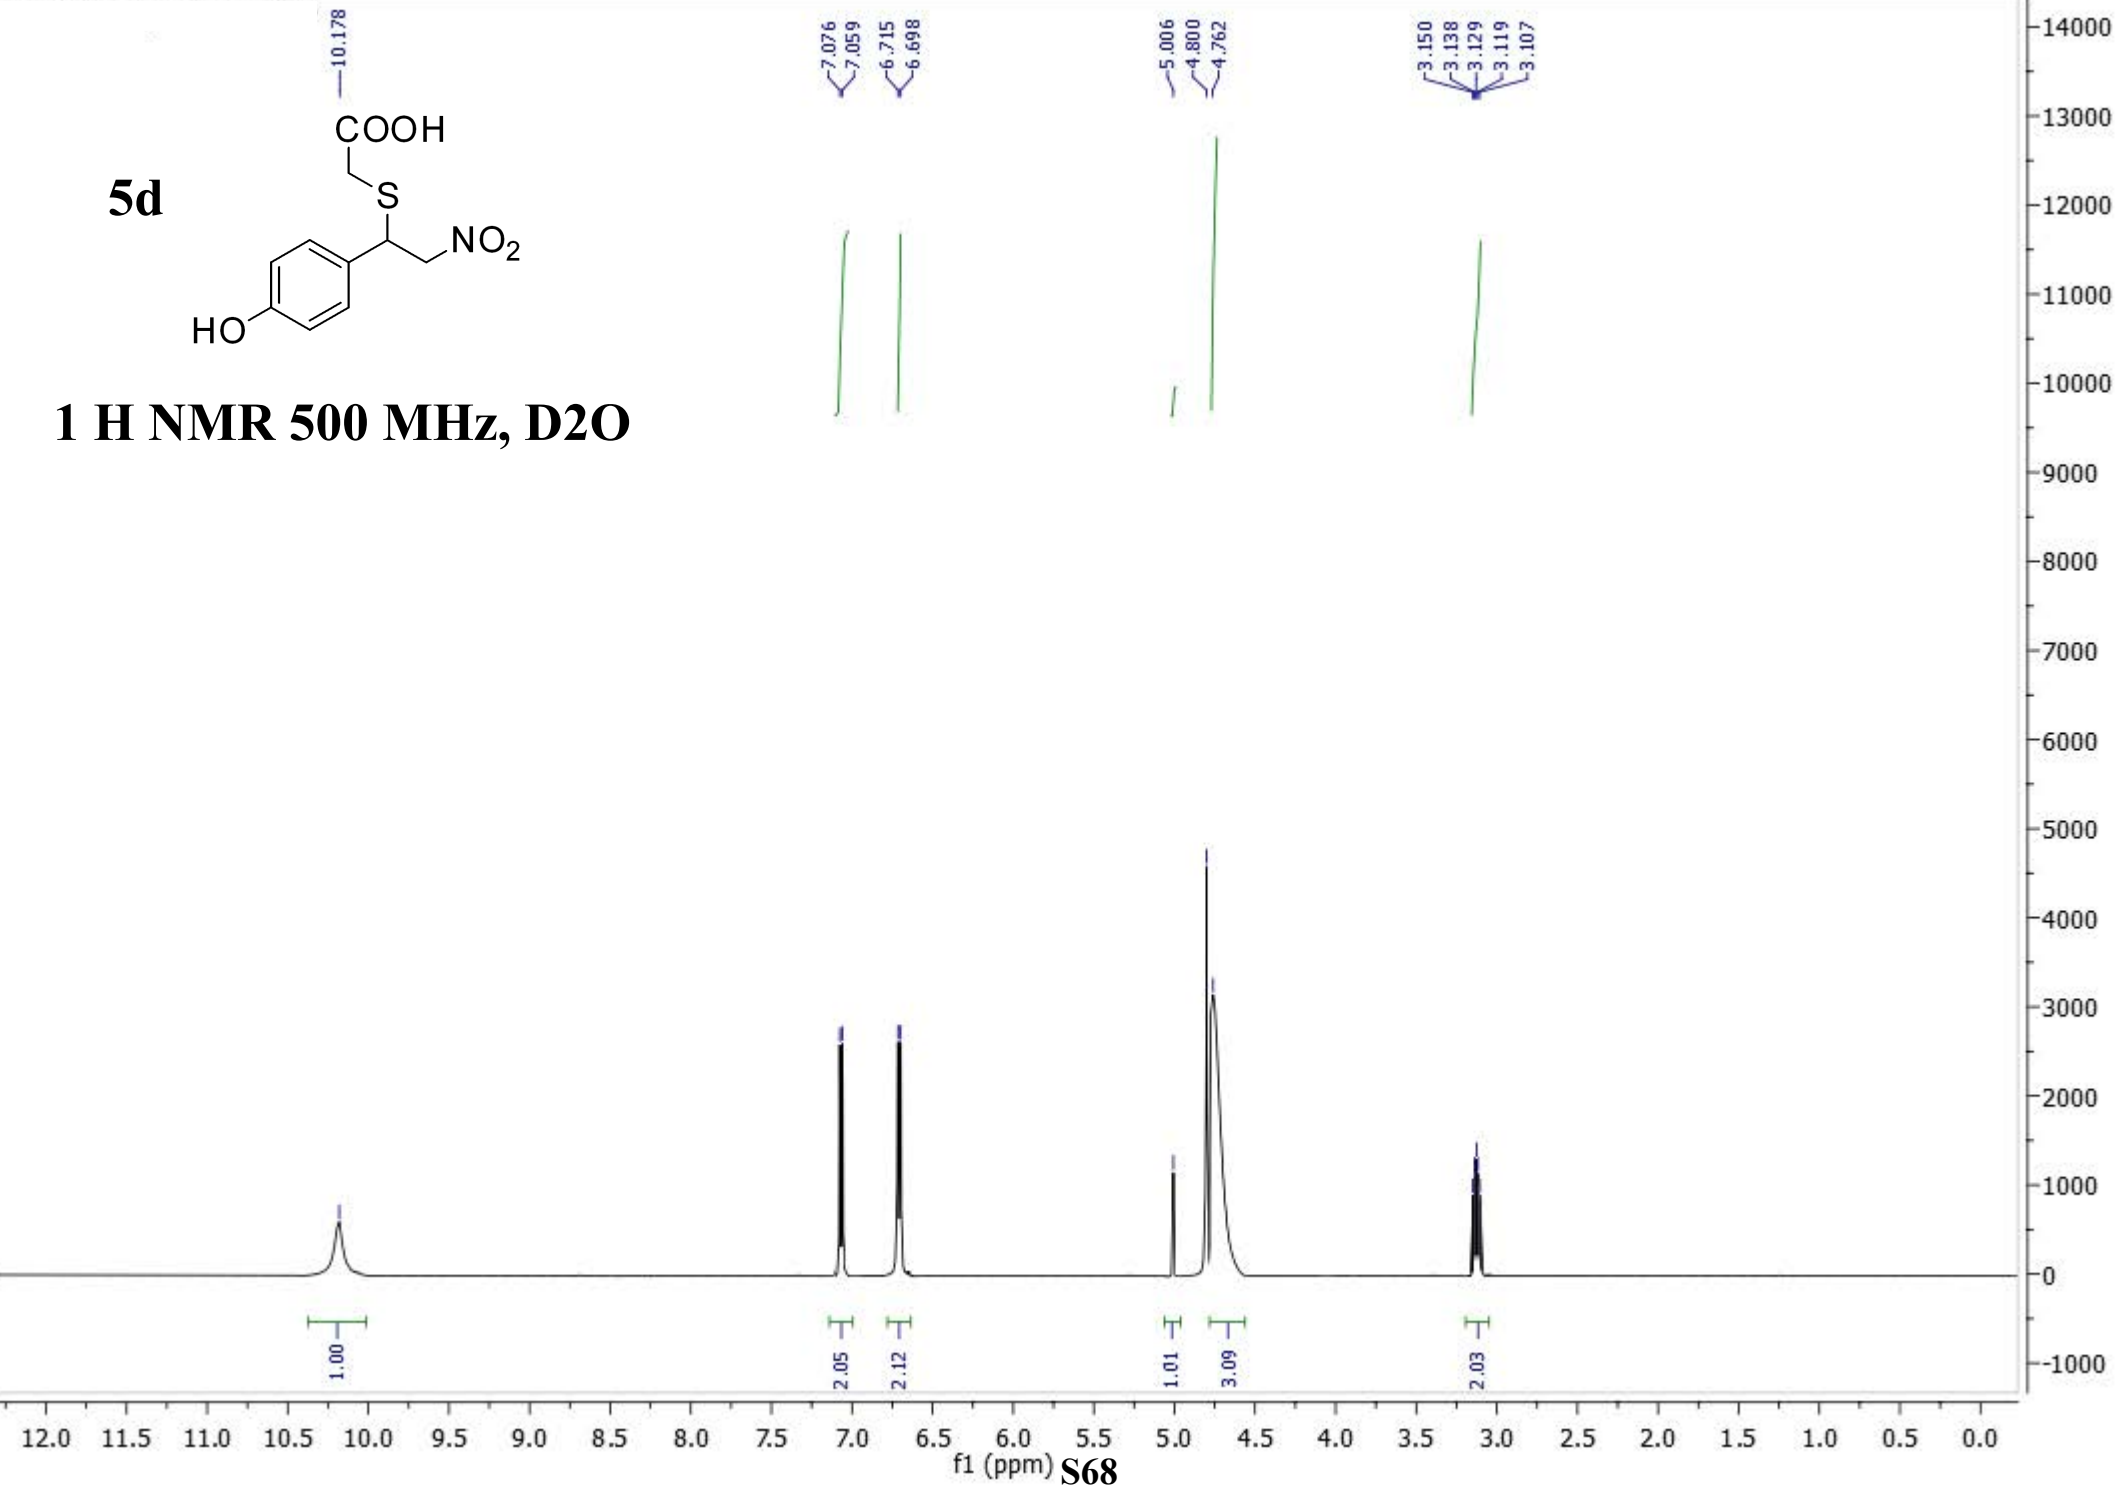

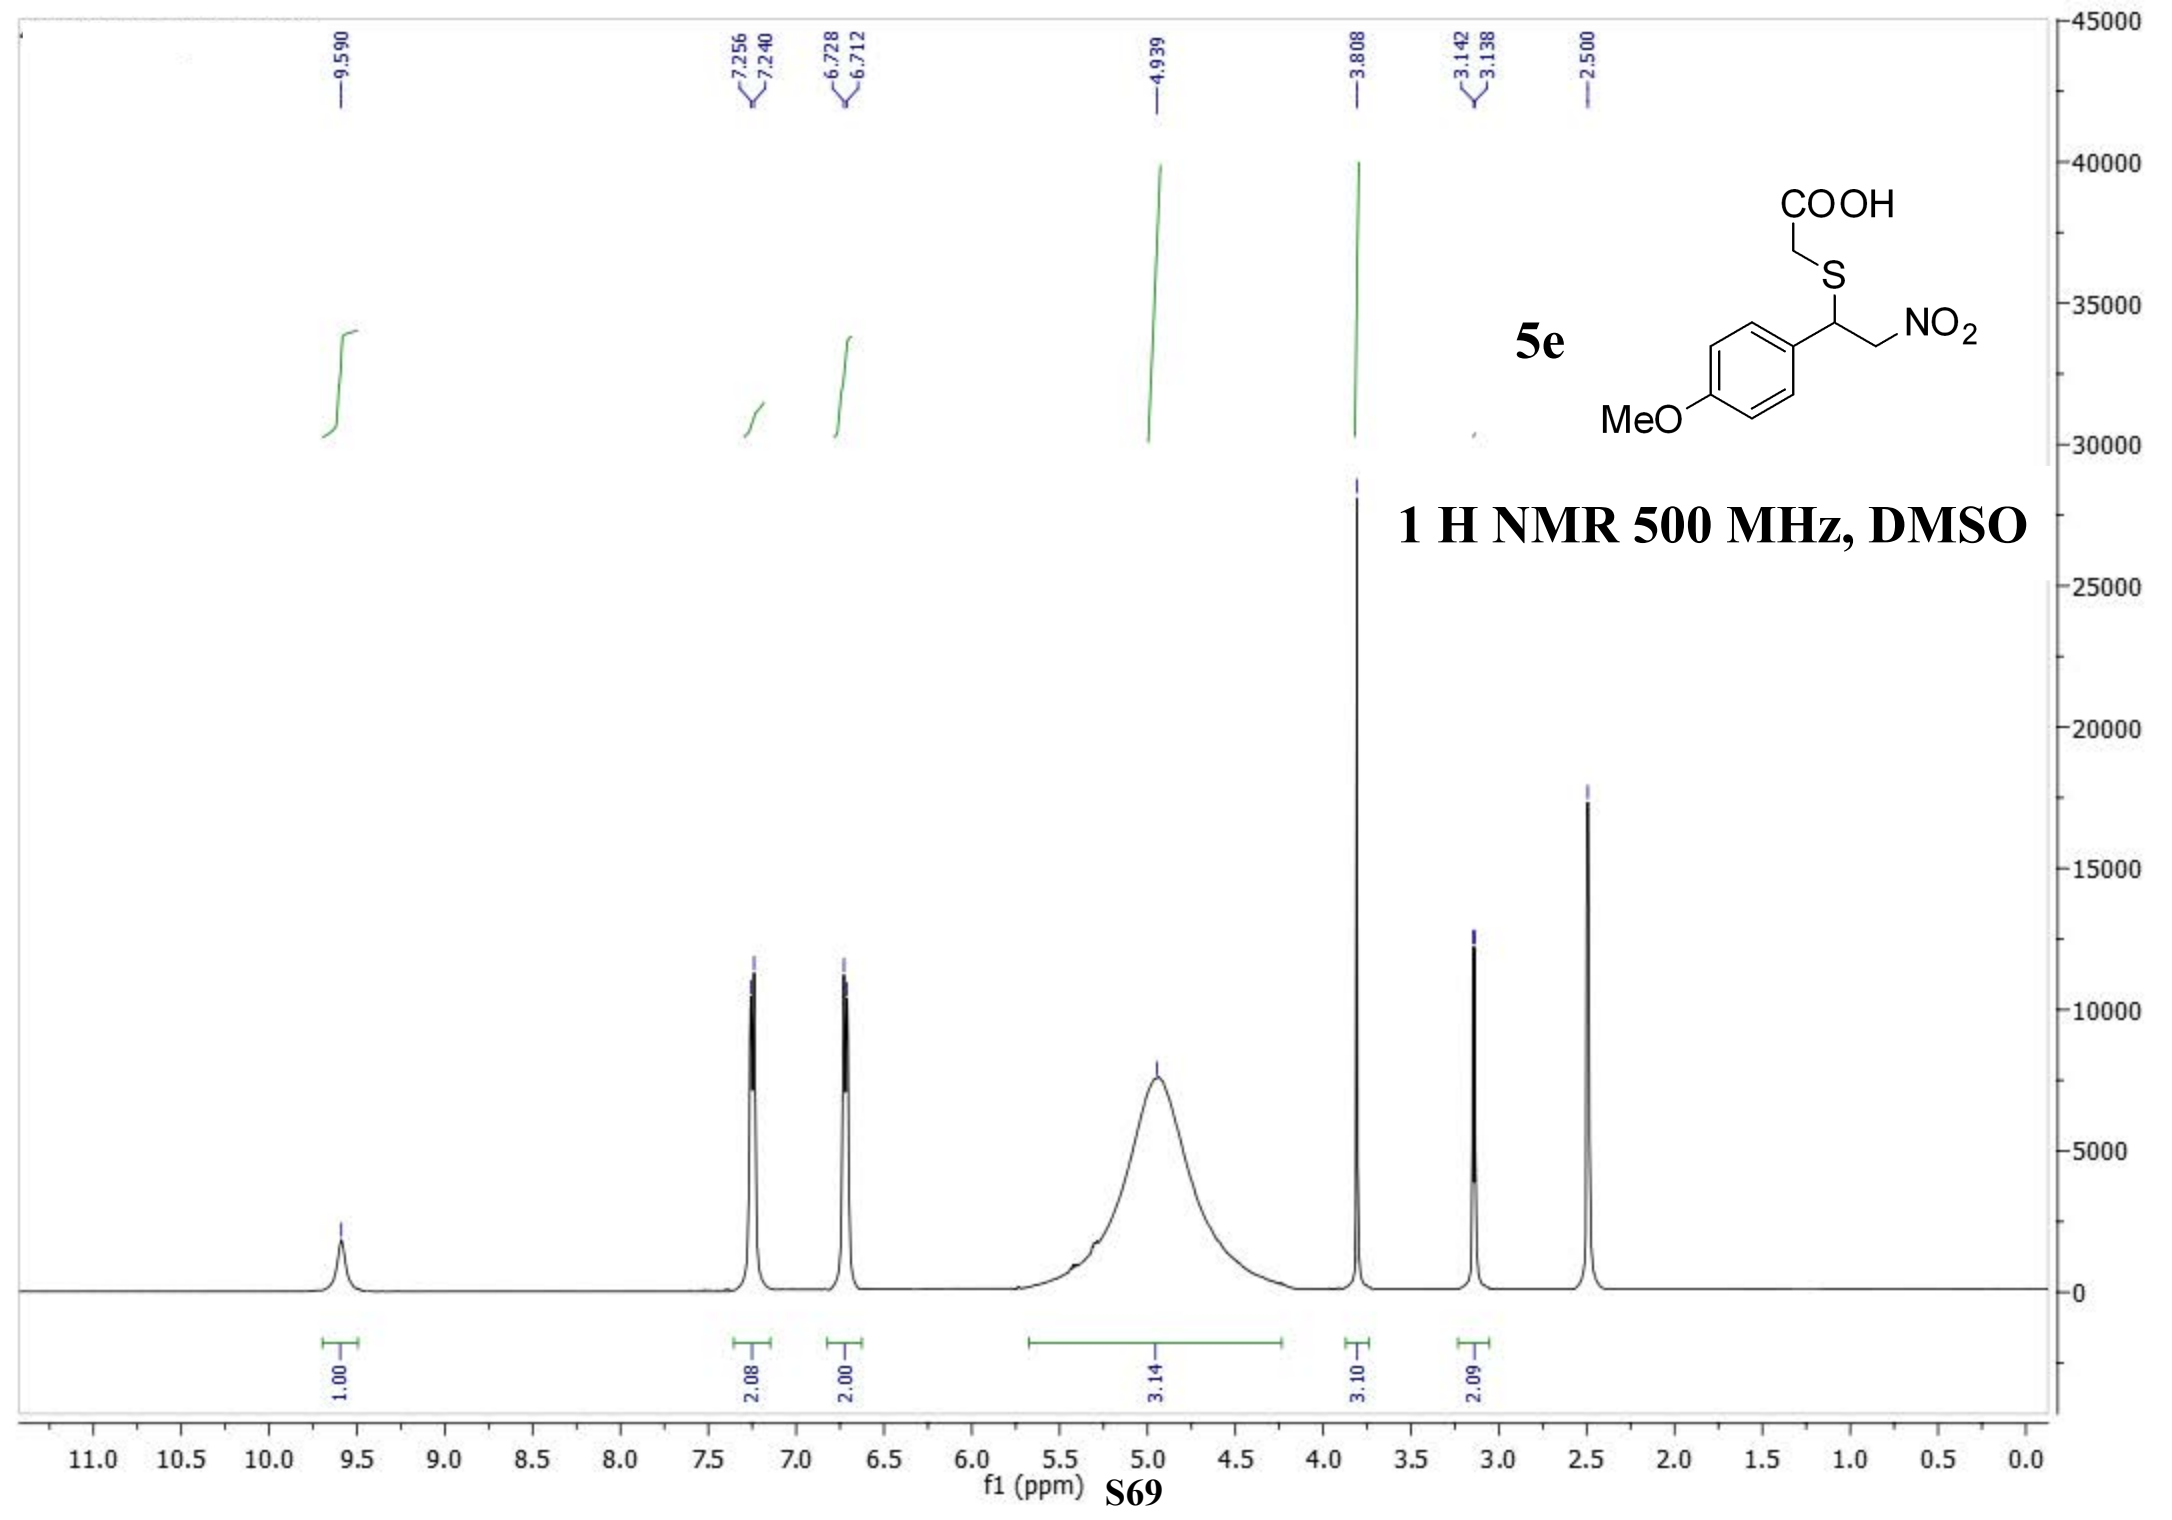

**5f**

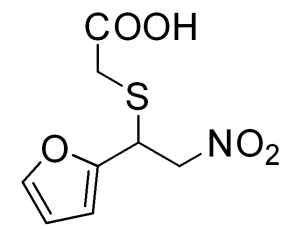

**1 H NMR 500 MHz, CDCl<sub>3</sub>**

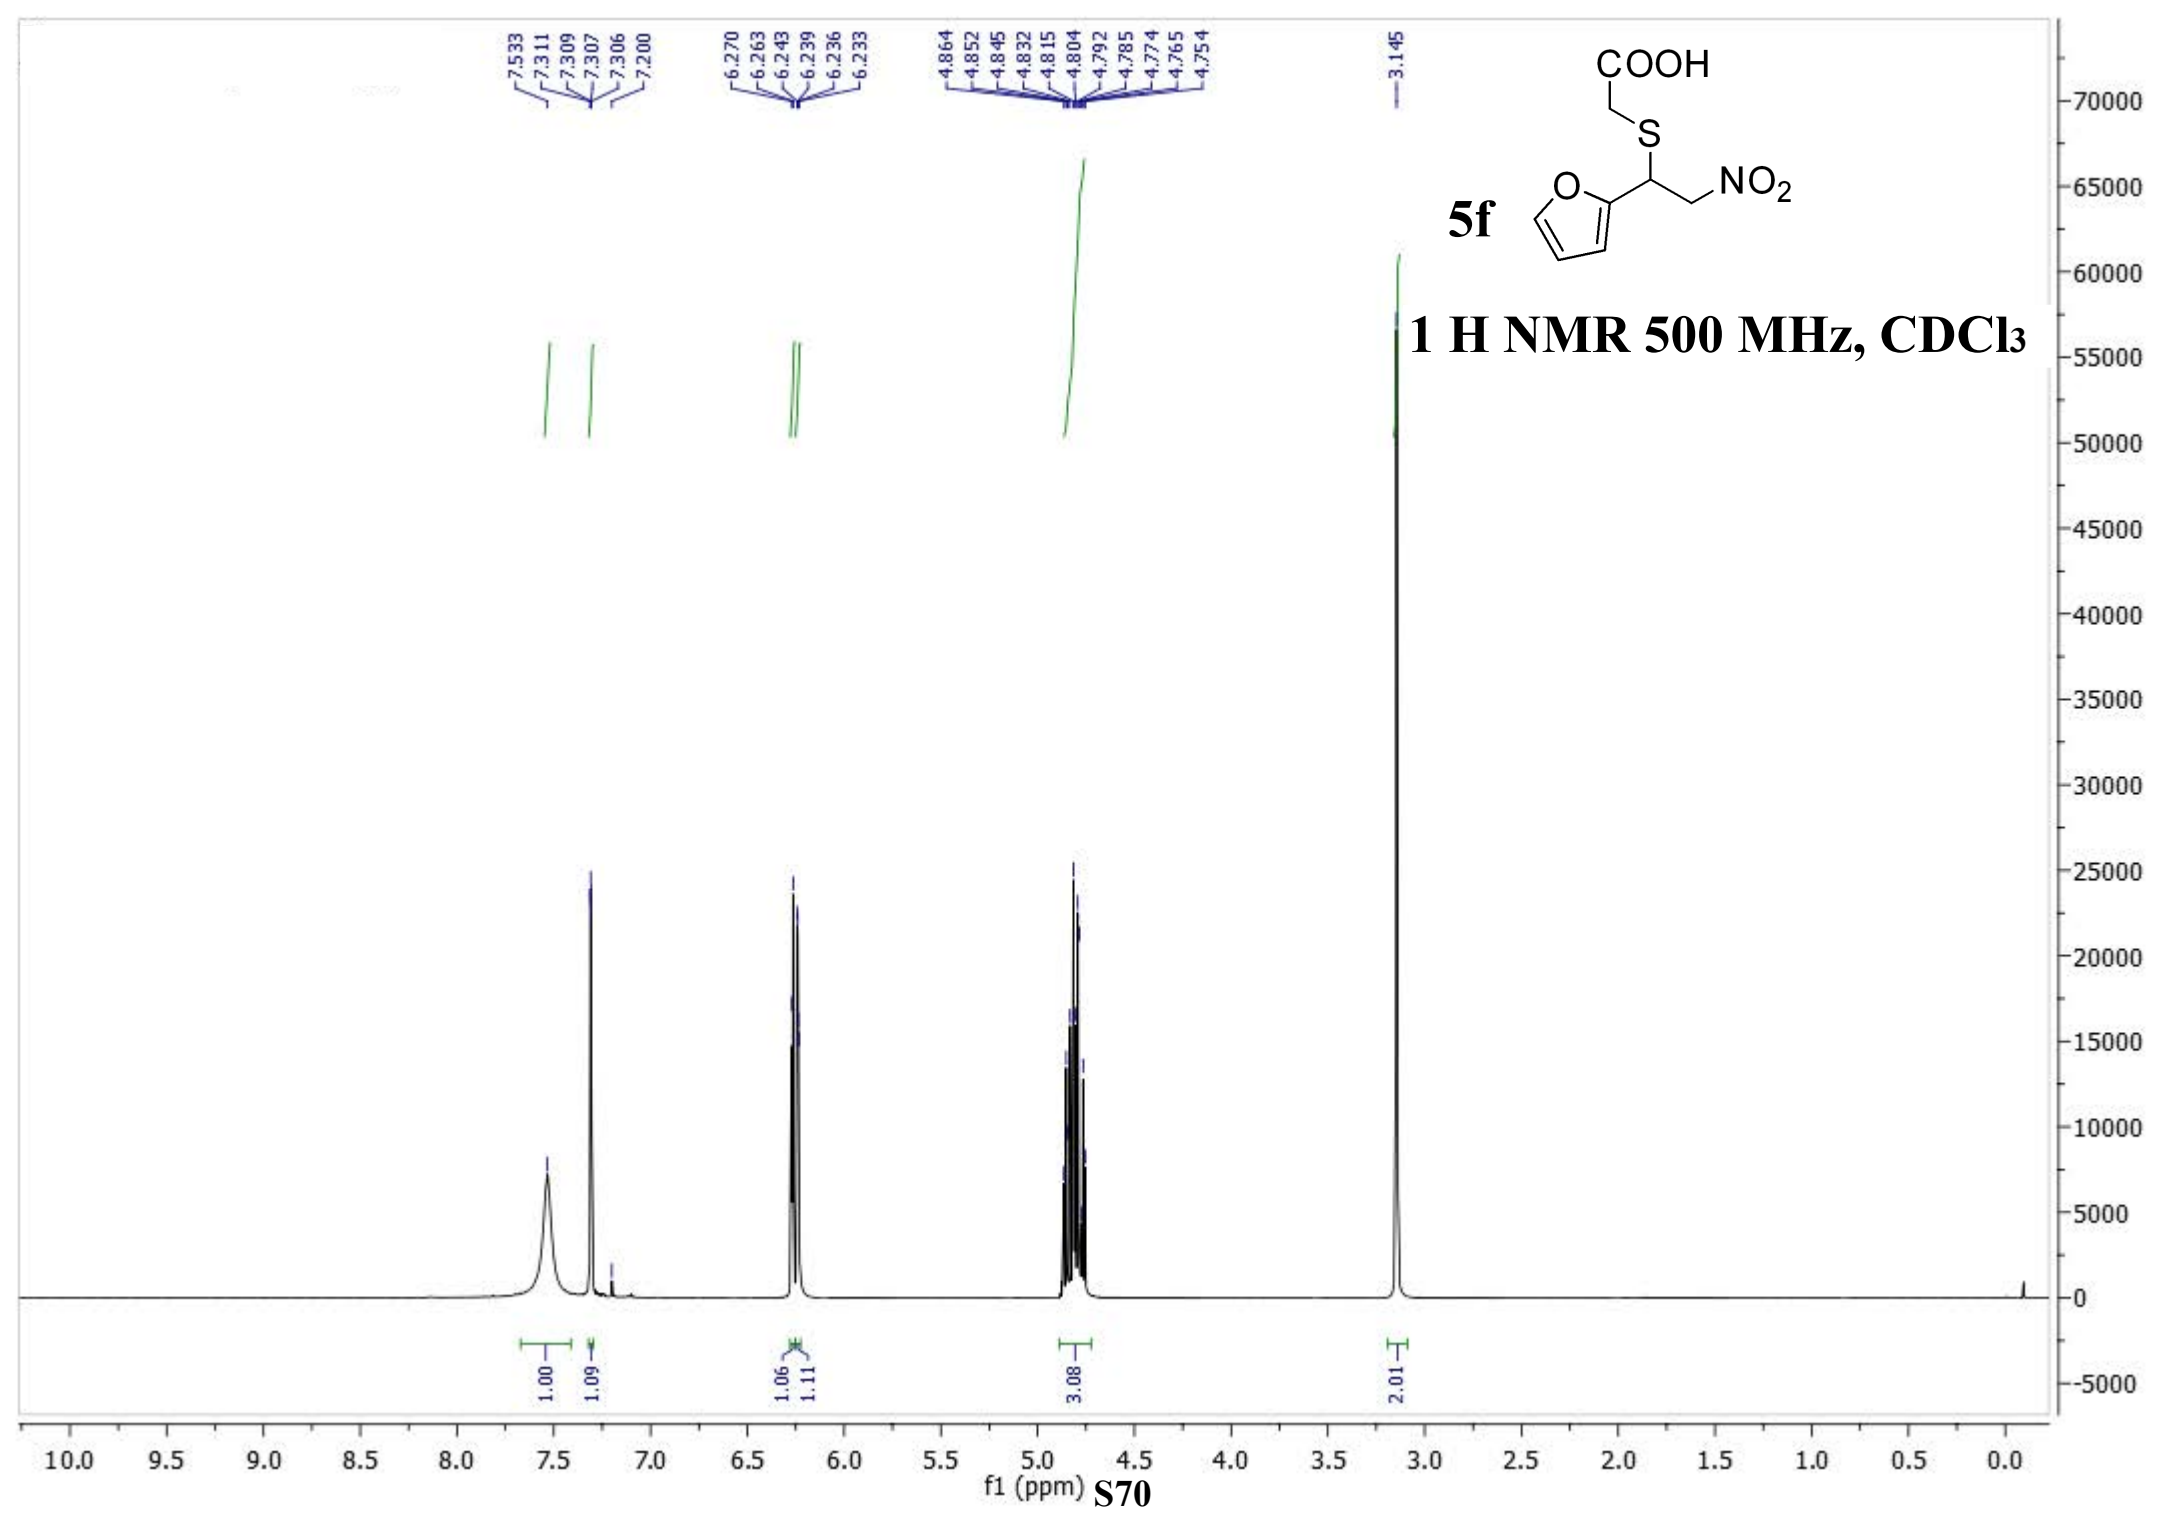

5g

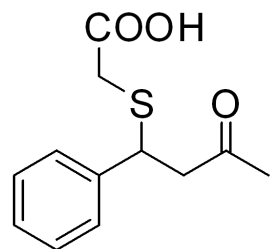

1 H NMR 500 MHz, CDCl<sub>3</sub>

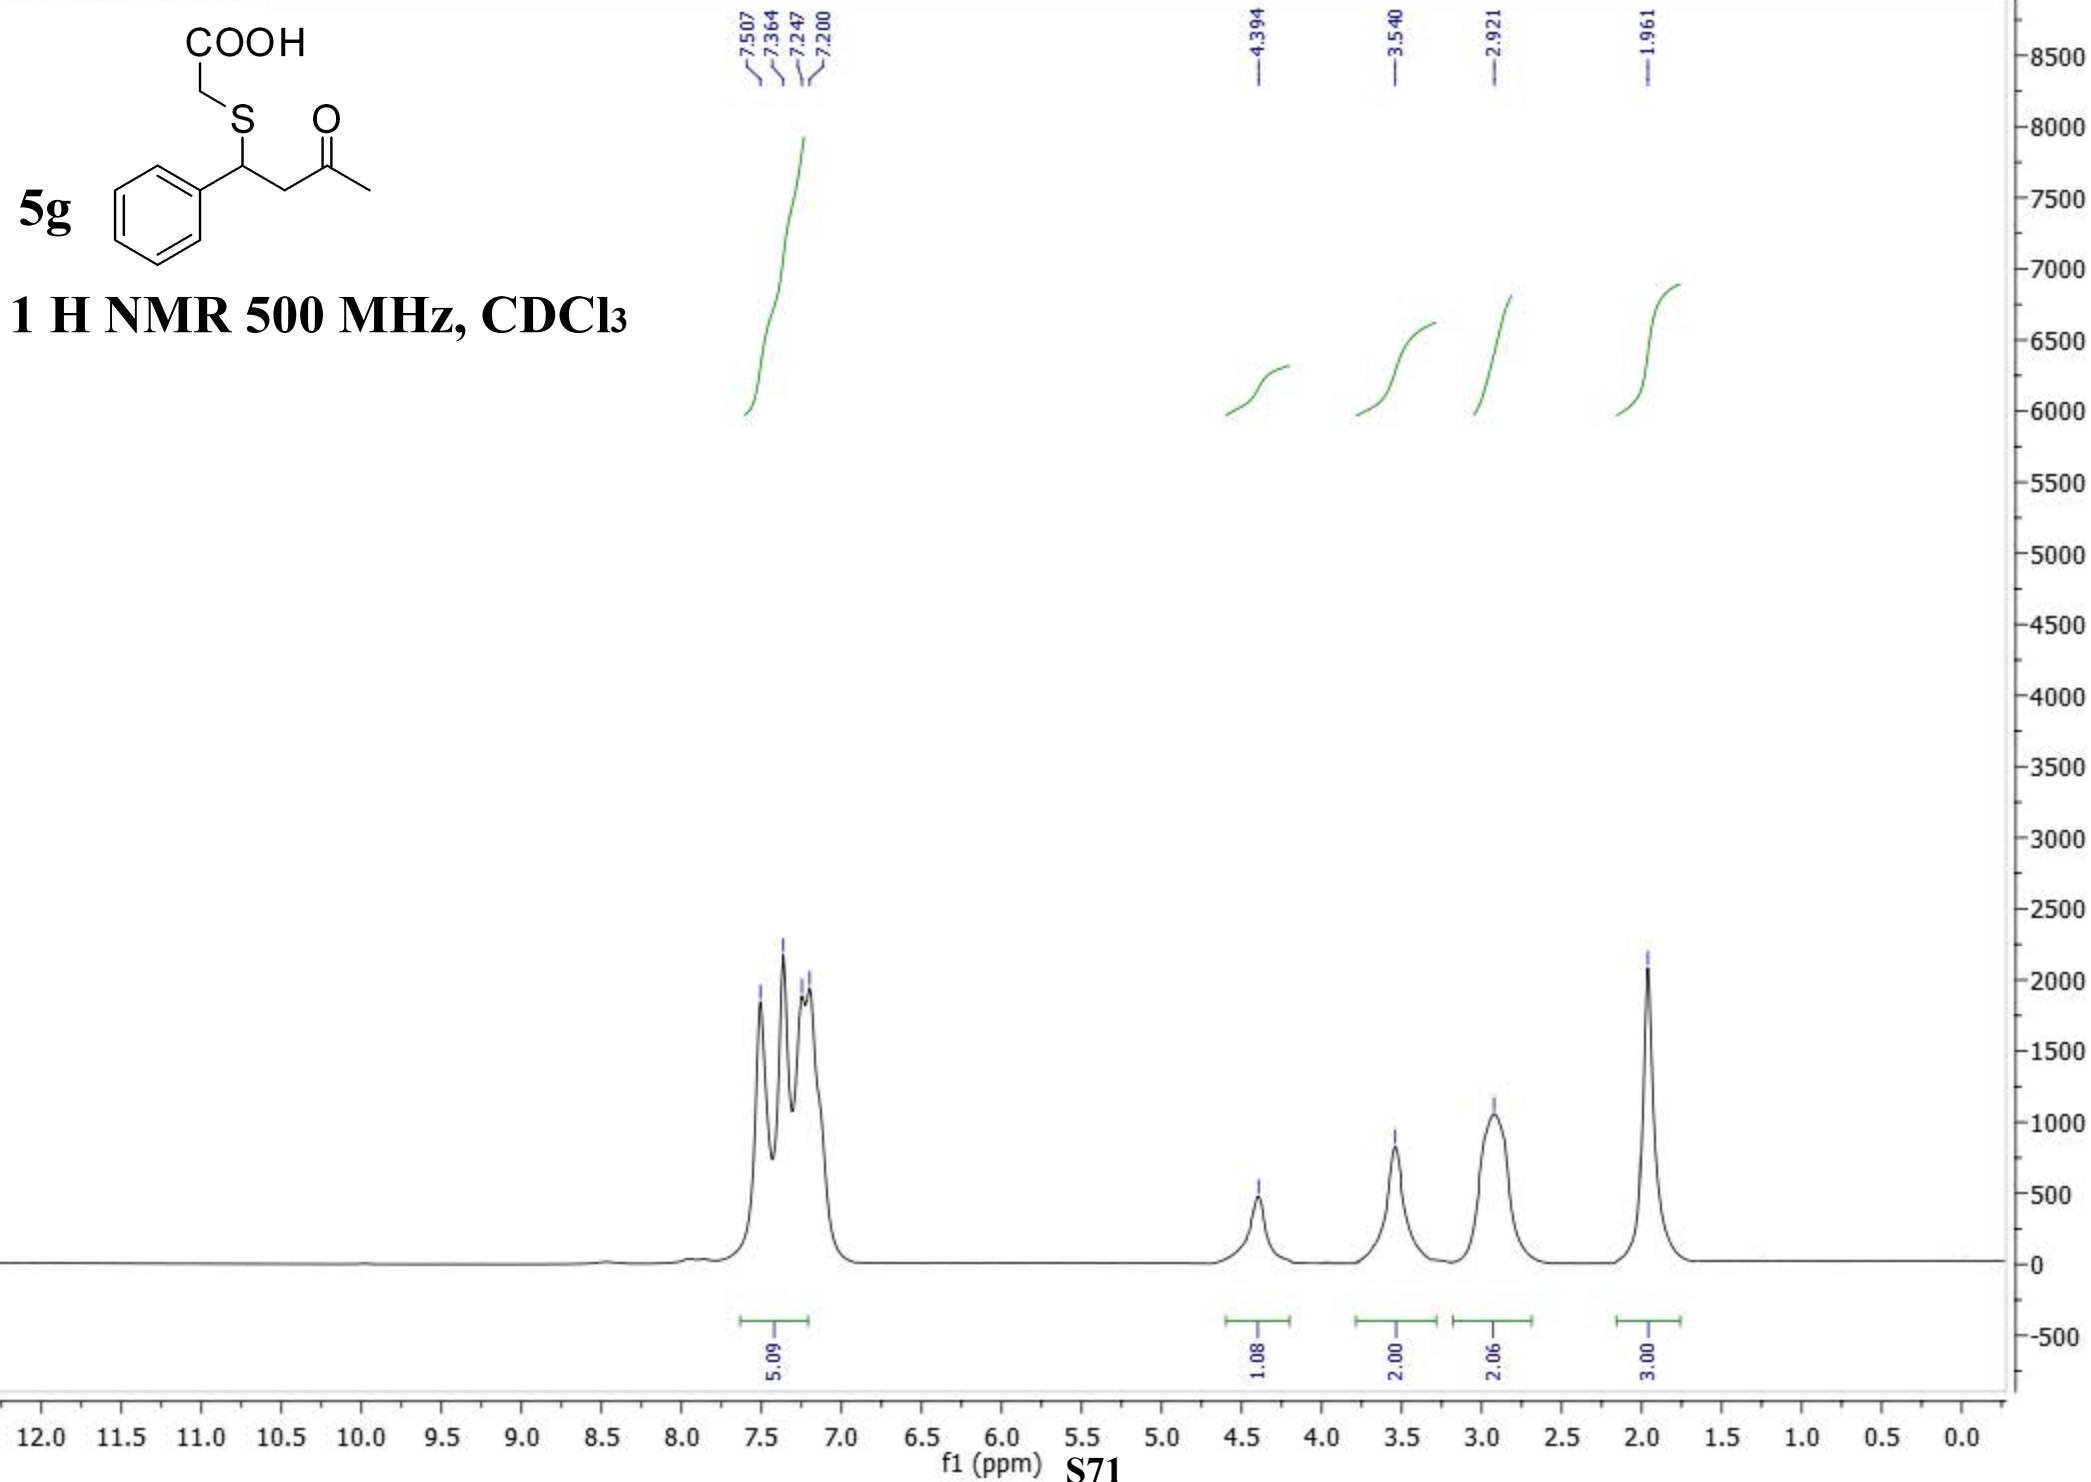

**5h**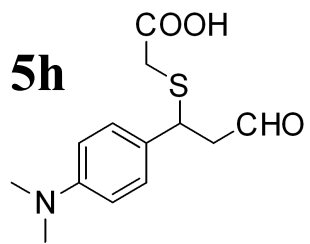**<sup>1</sup>H NMR 500 MHz, DMSO**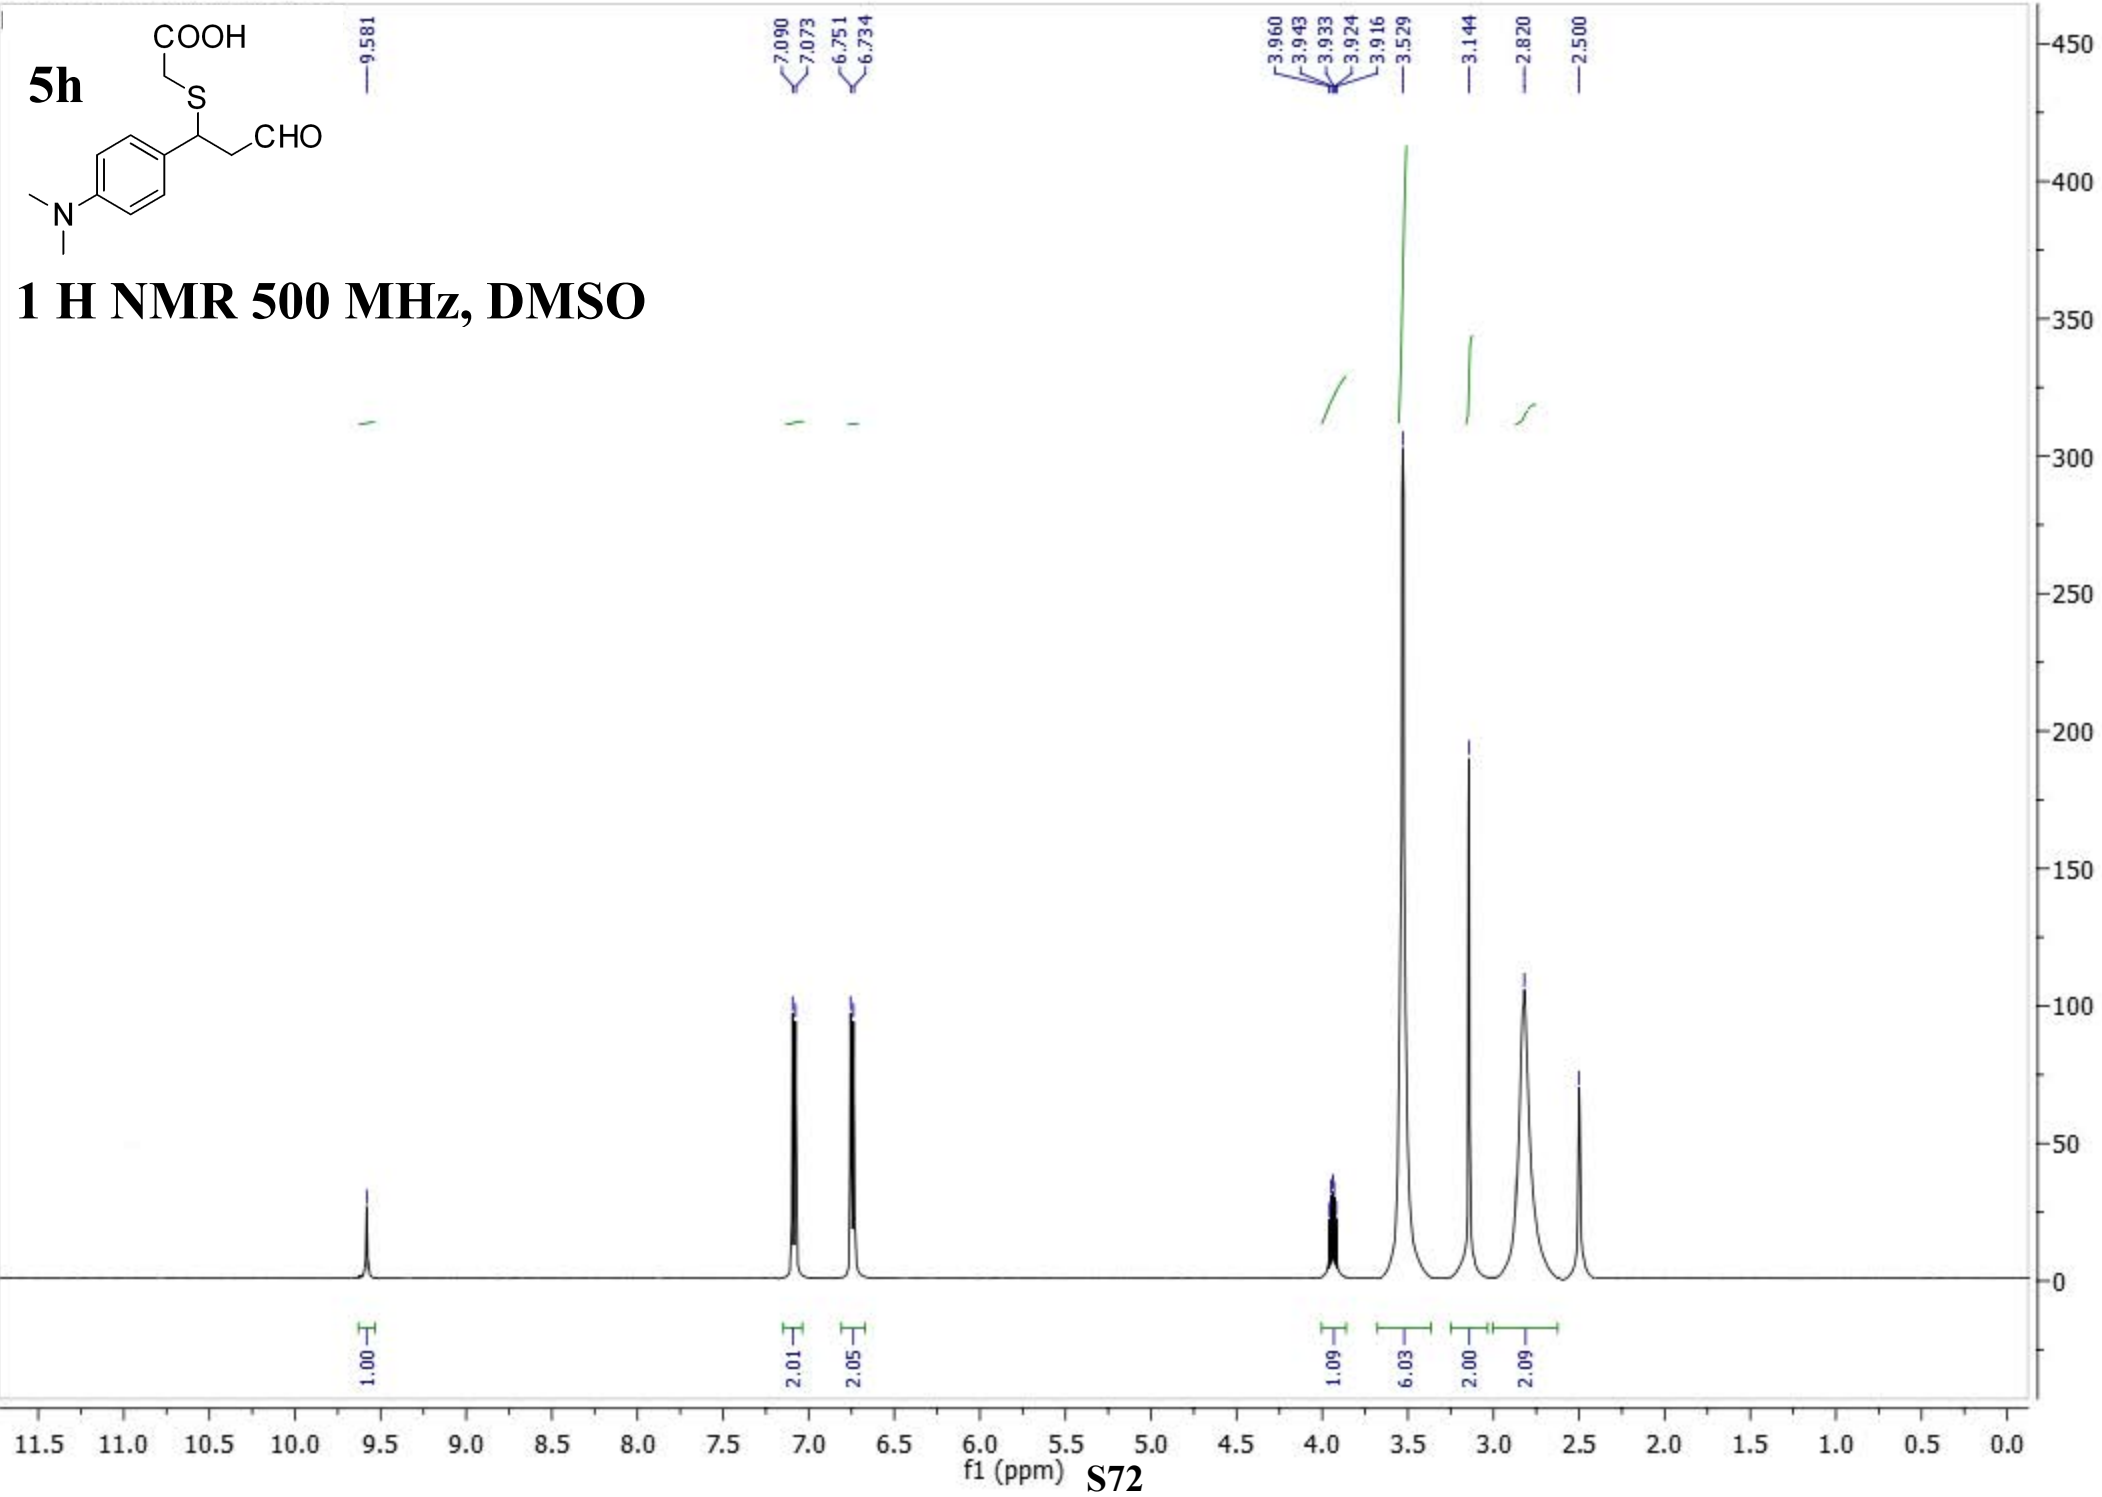



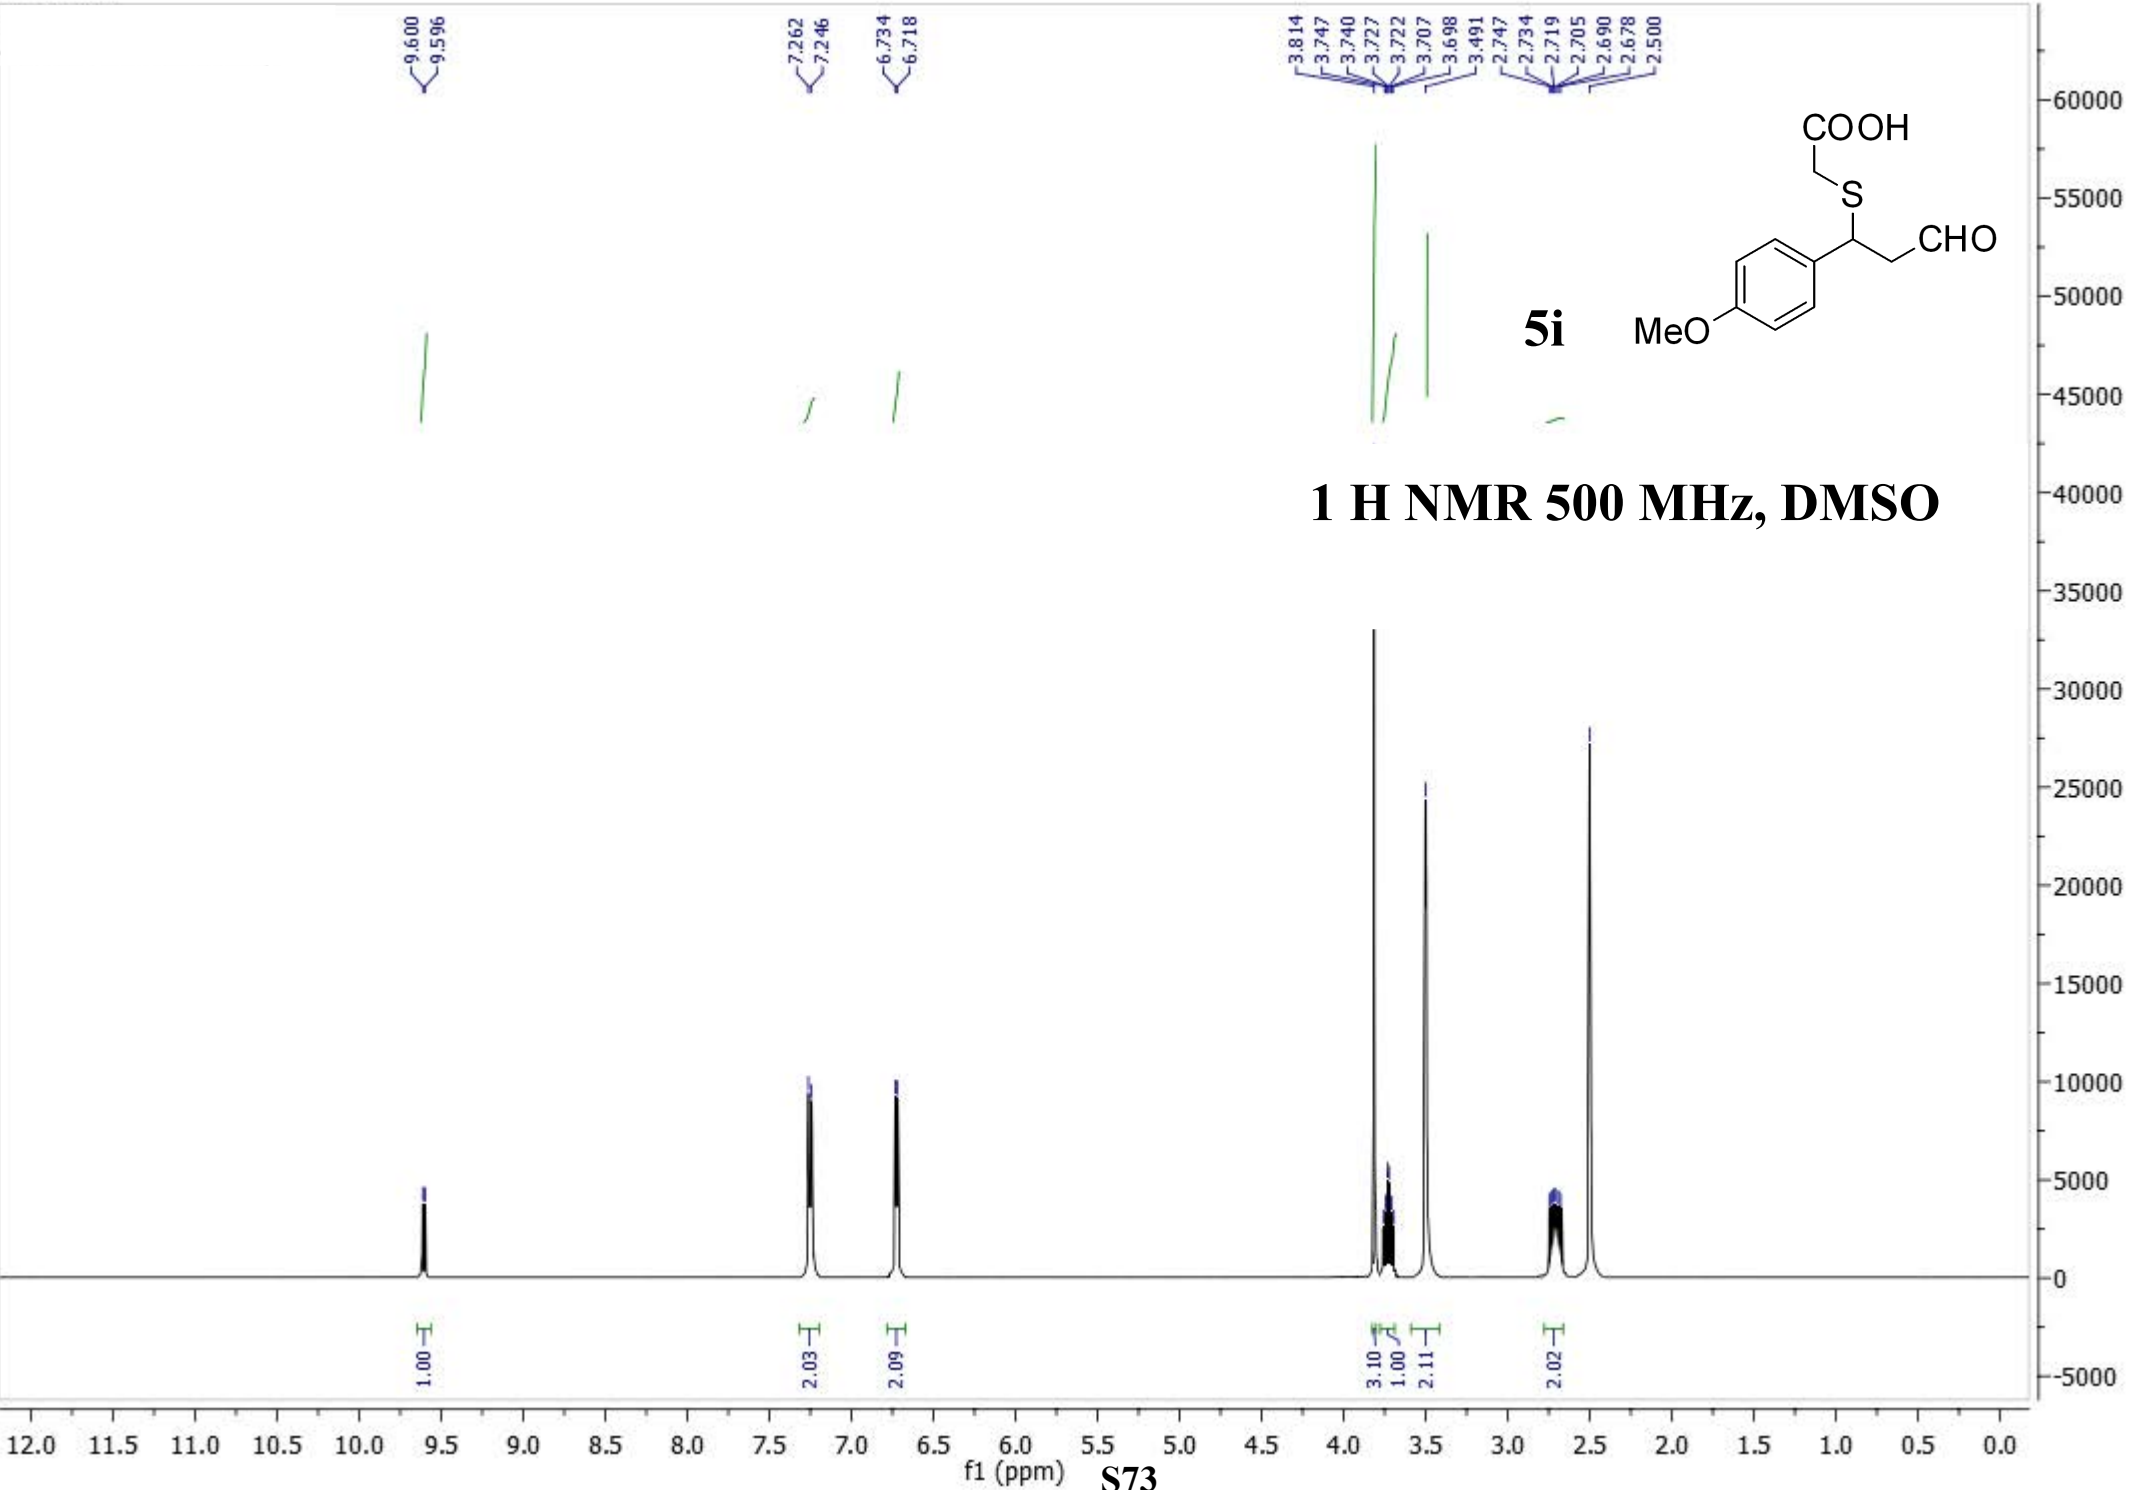

5j

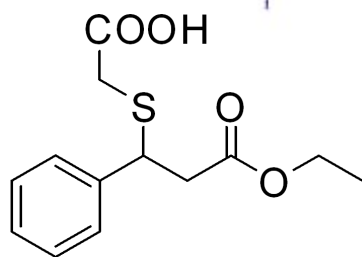

**<sup>1</sup>H NMR 500 MHz, DMSO**

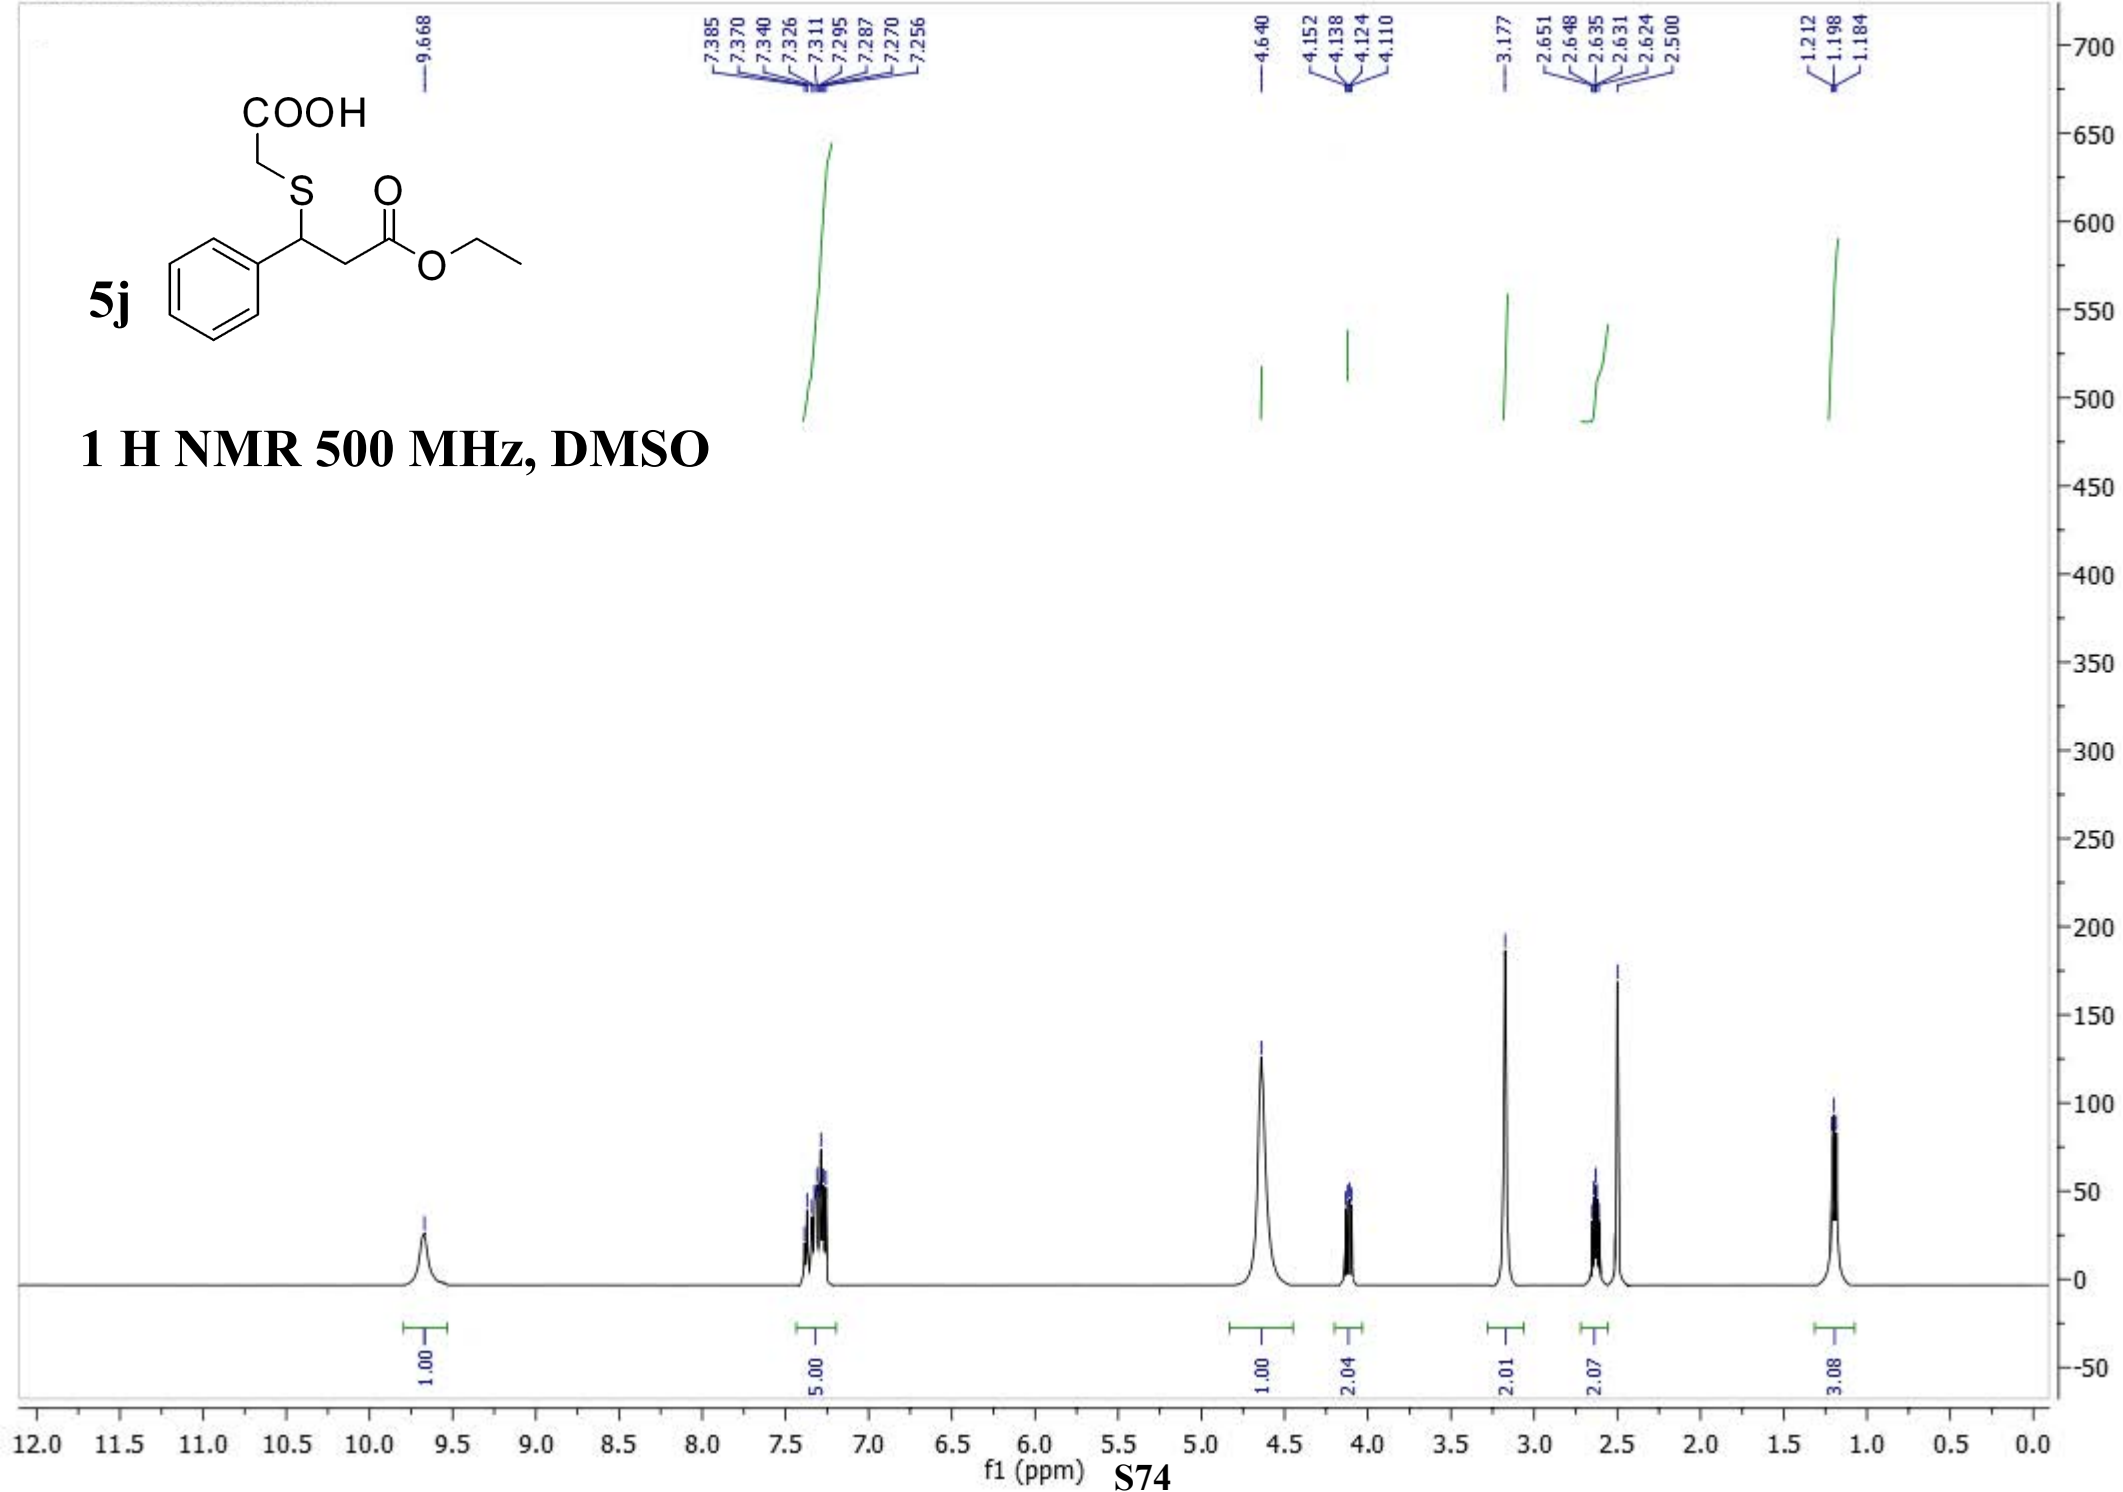

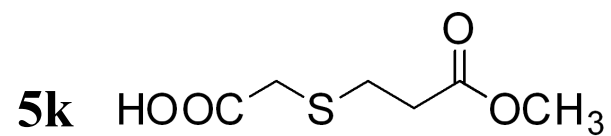

**1 H NMR 500 MHz, DMSO**

3.584  
3.143  
2.731  
2.599  
2.500

3.00  
2.11  
2.07  
2.12

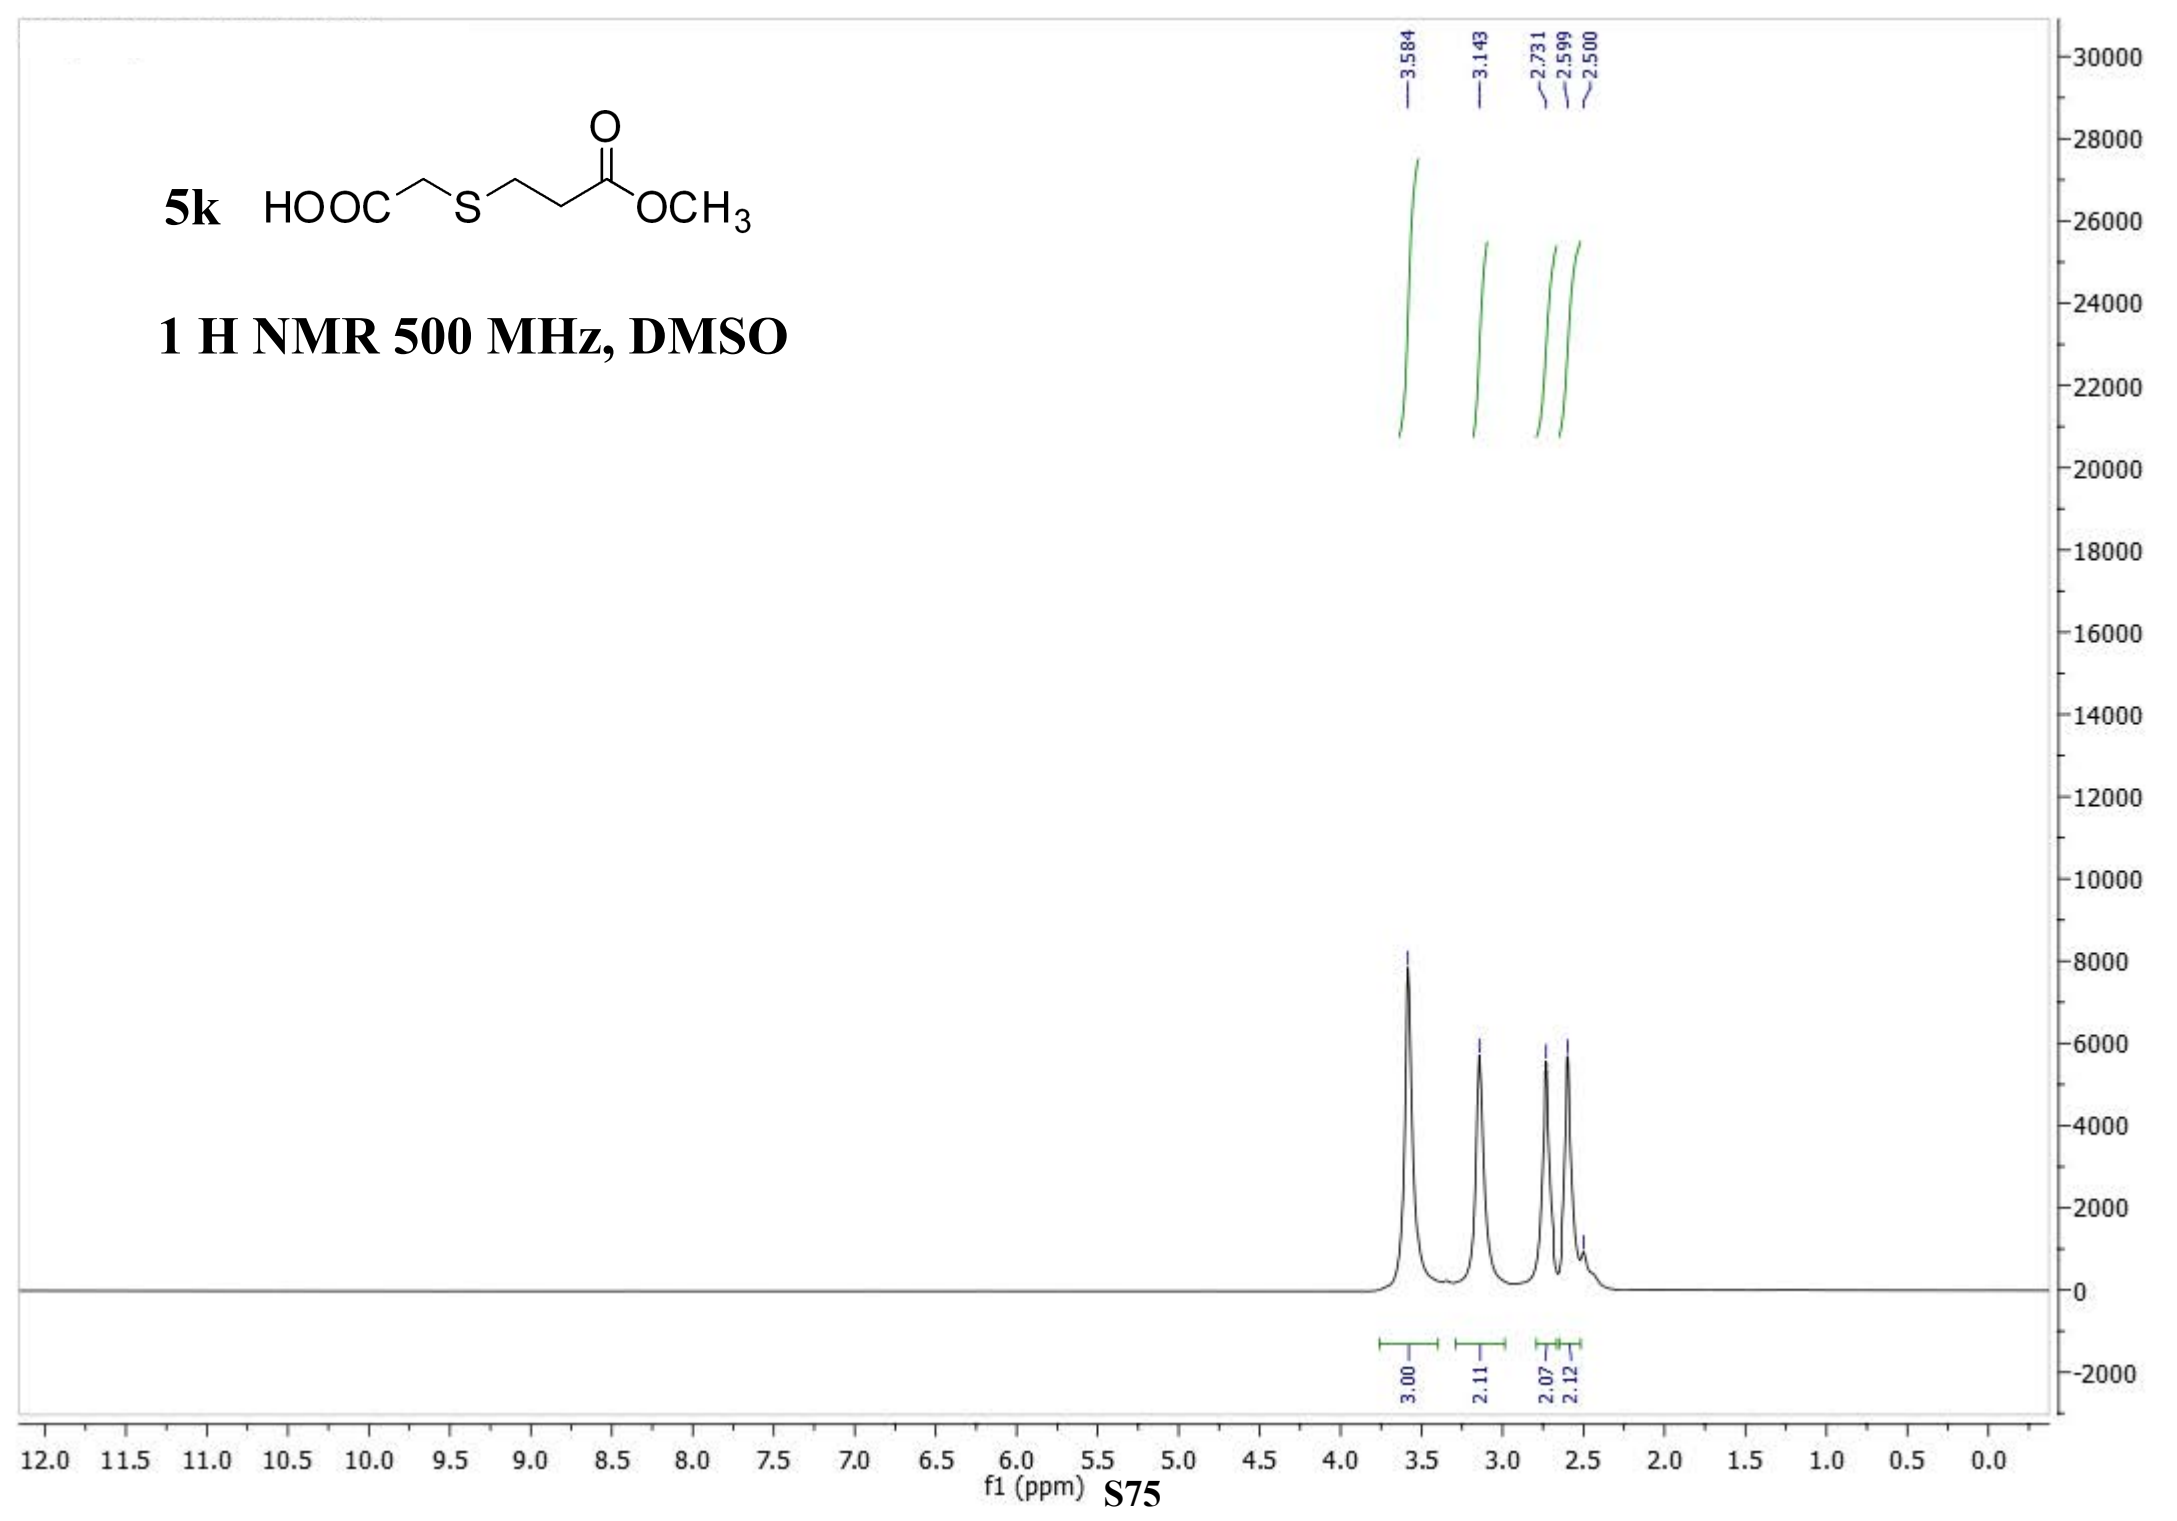

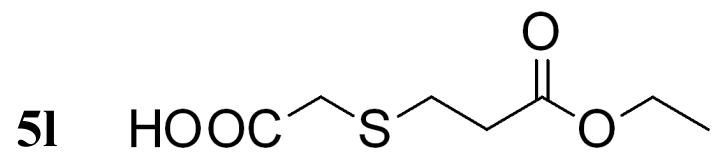

**<sup>1</sup>H NMR 500 MHz, DMSO**

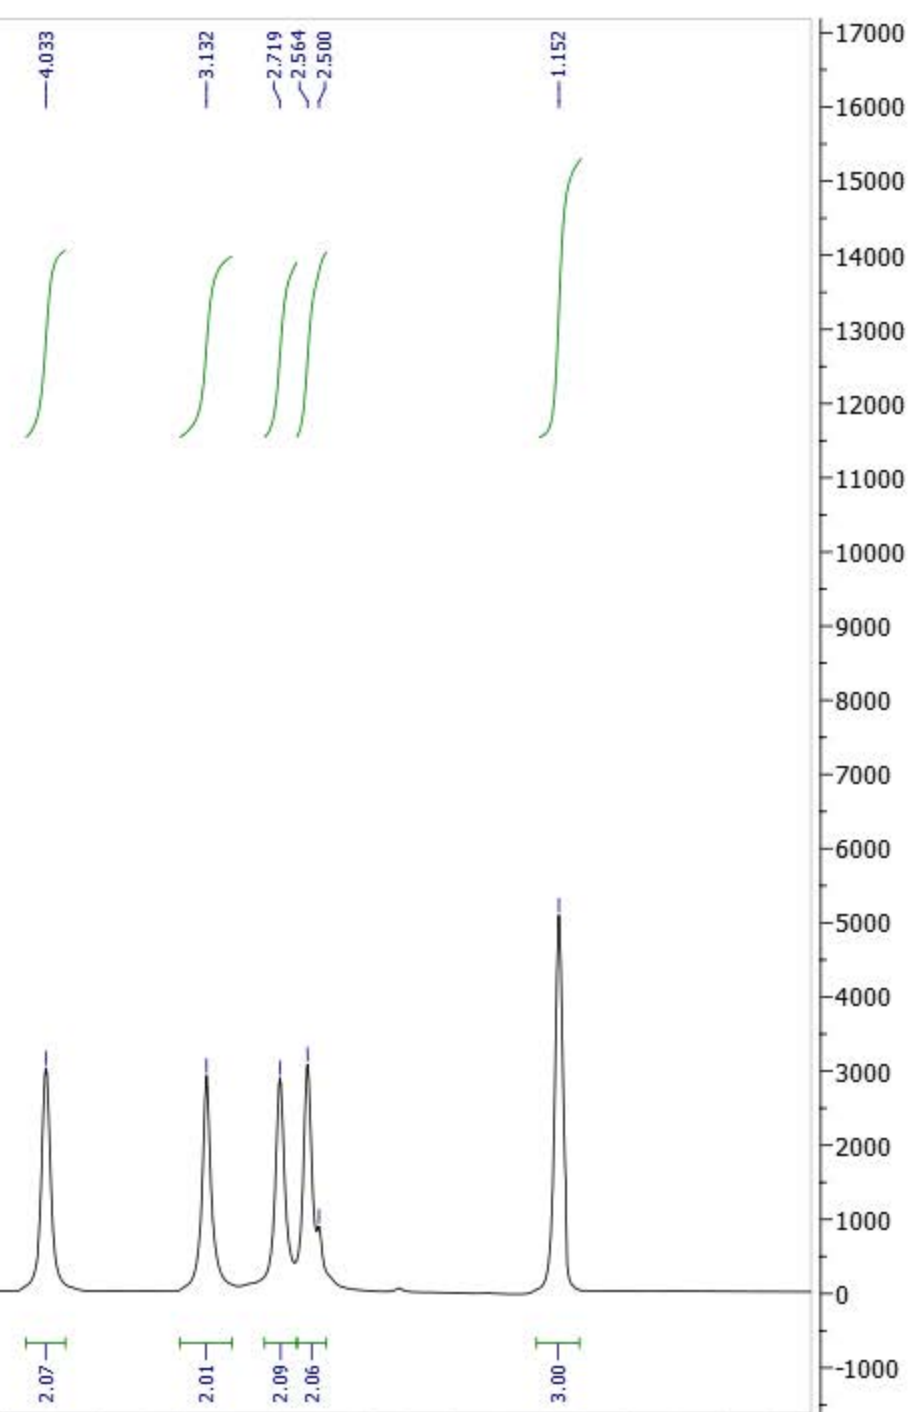

5m

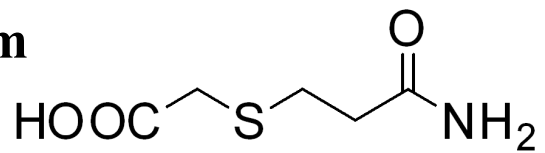

1 H NMR 500 MHz, DMSO

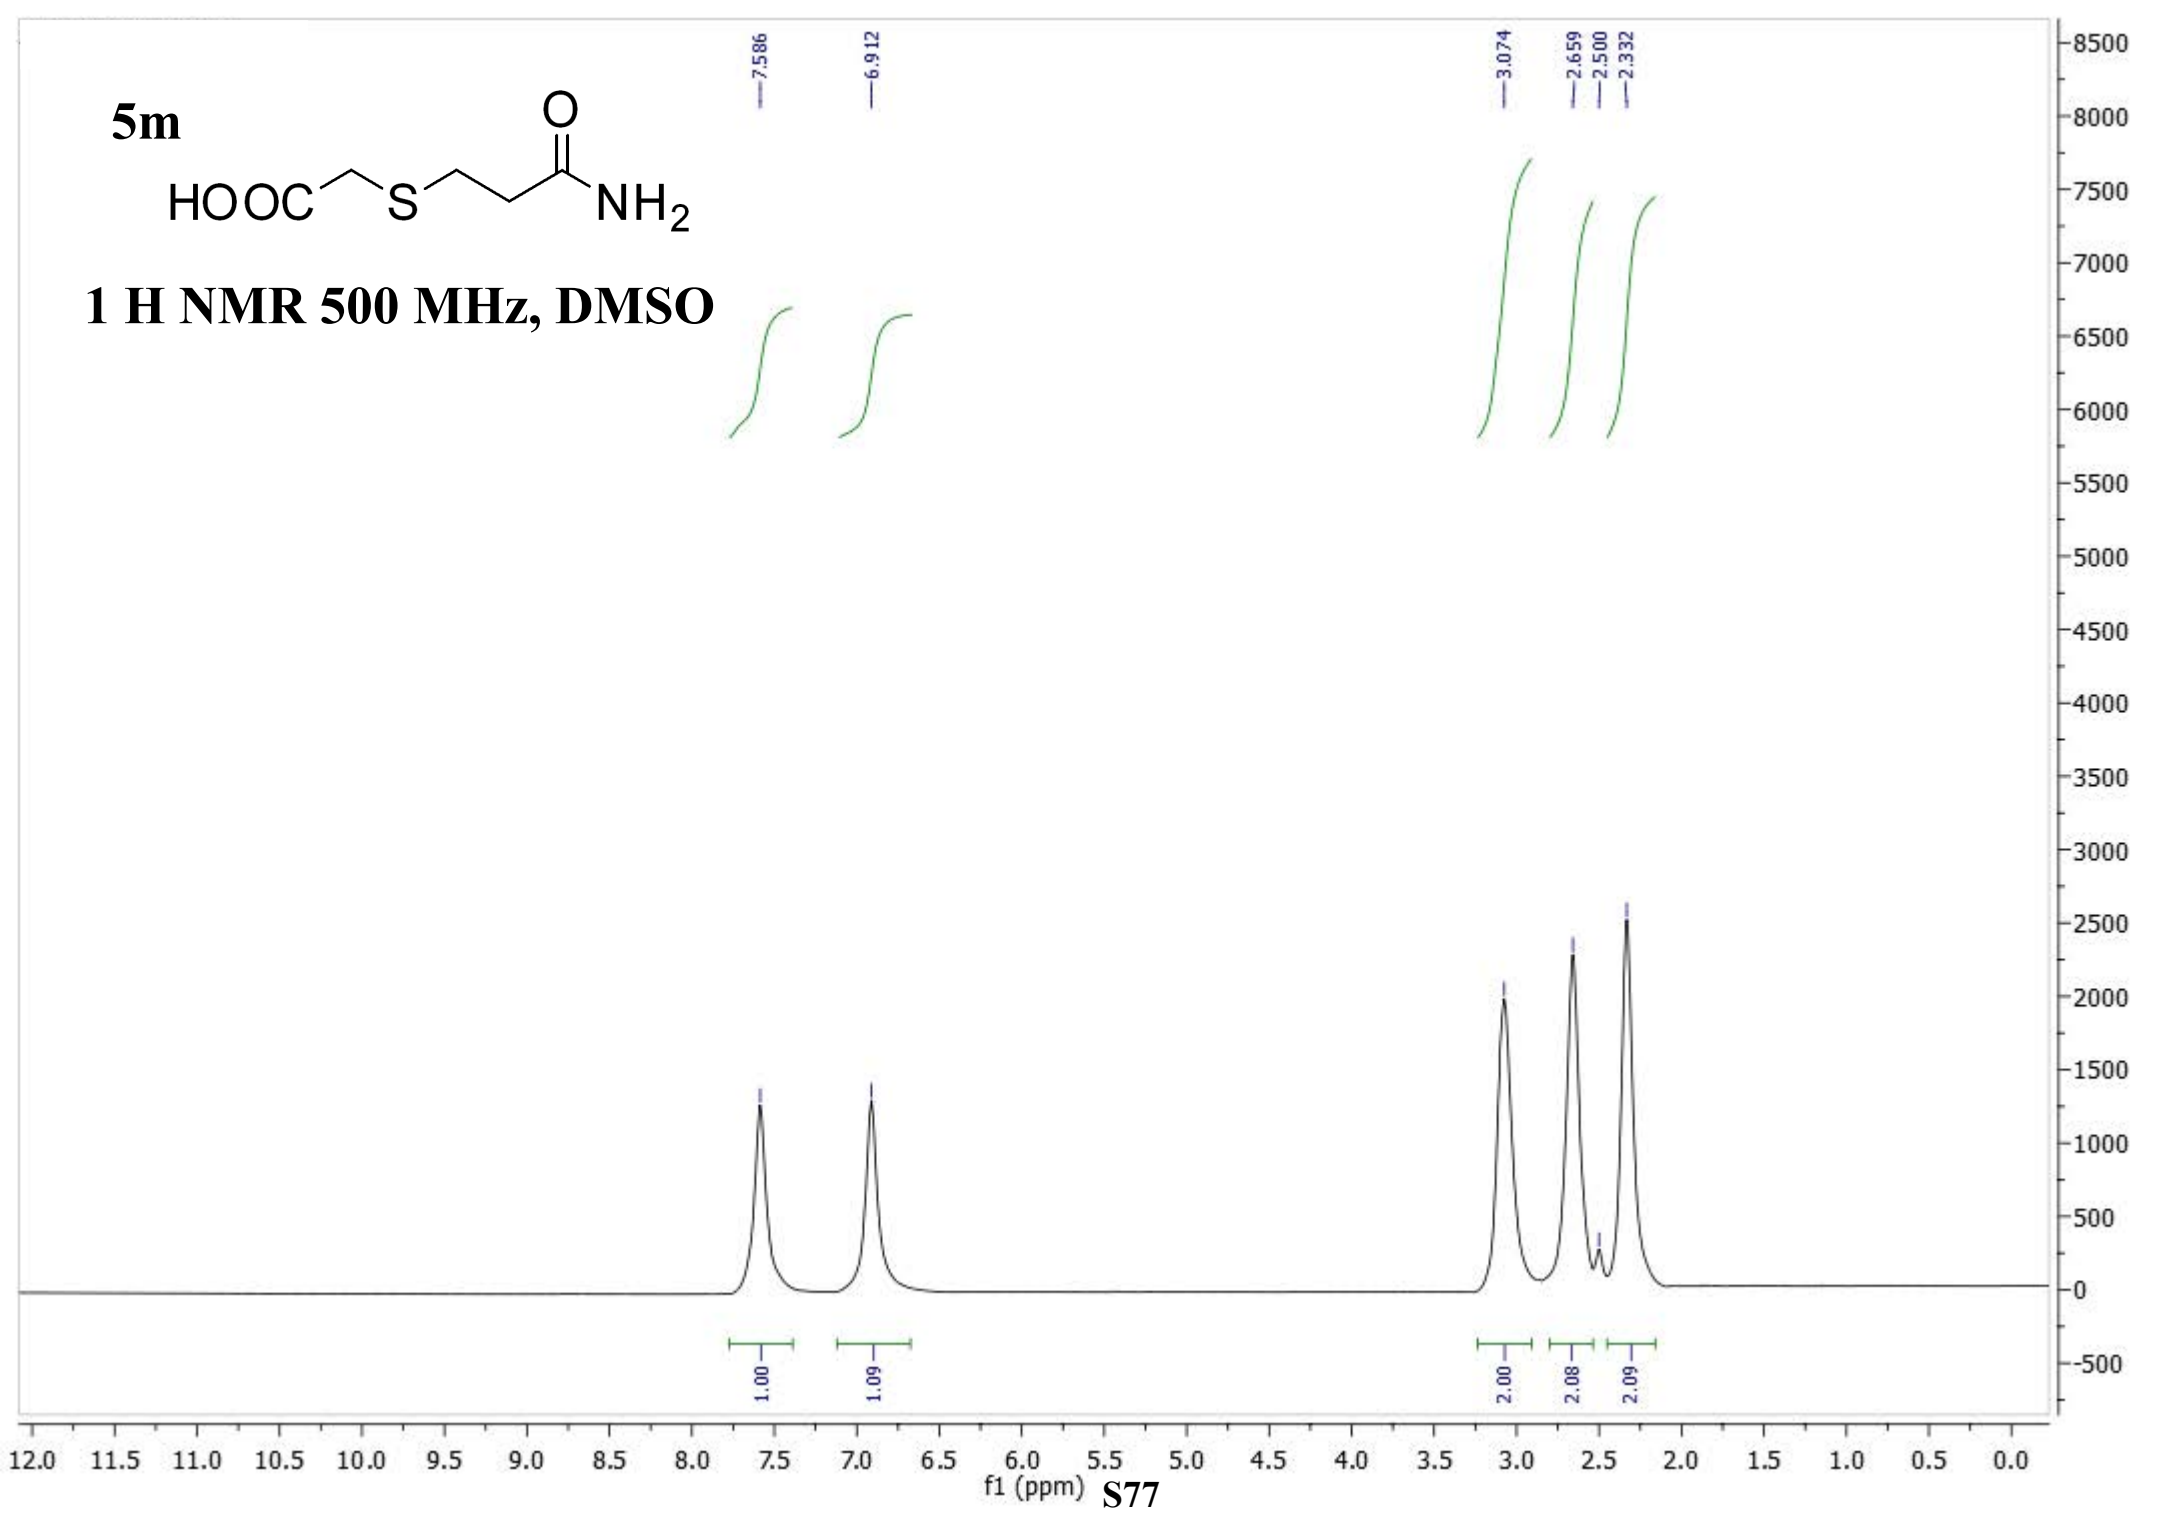

5n

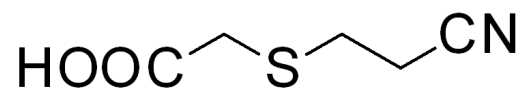

1 H NMR 500 MHz, DMSO

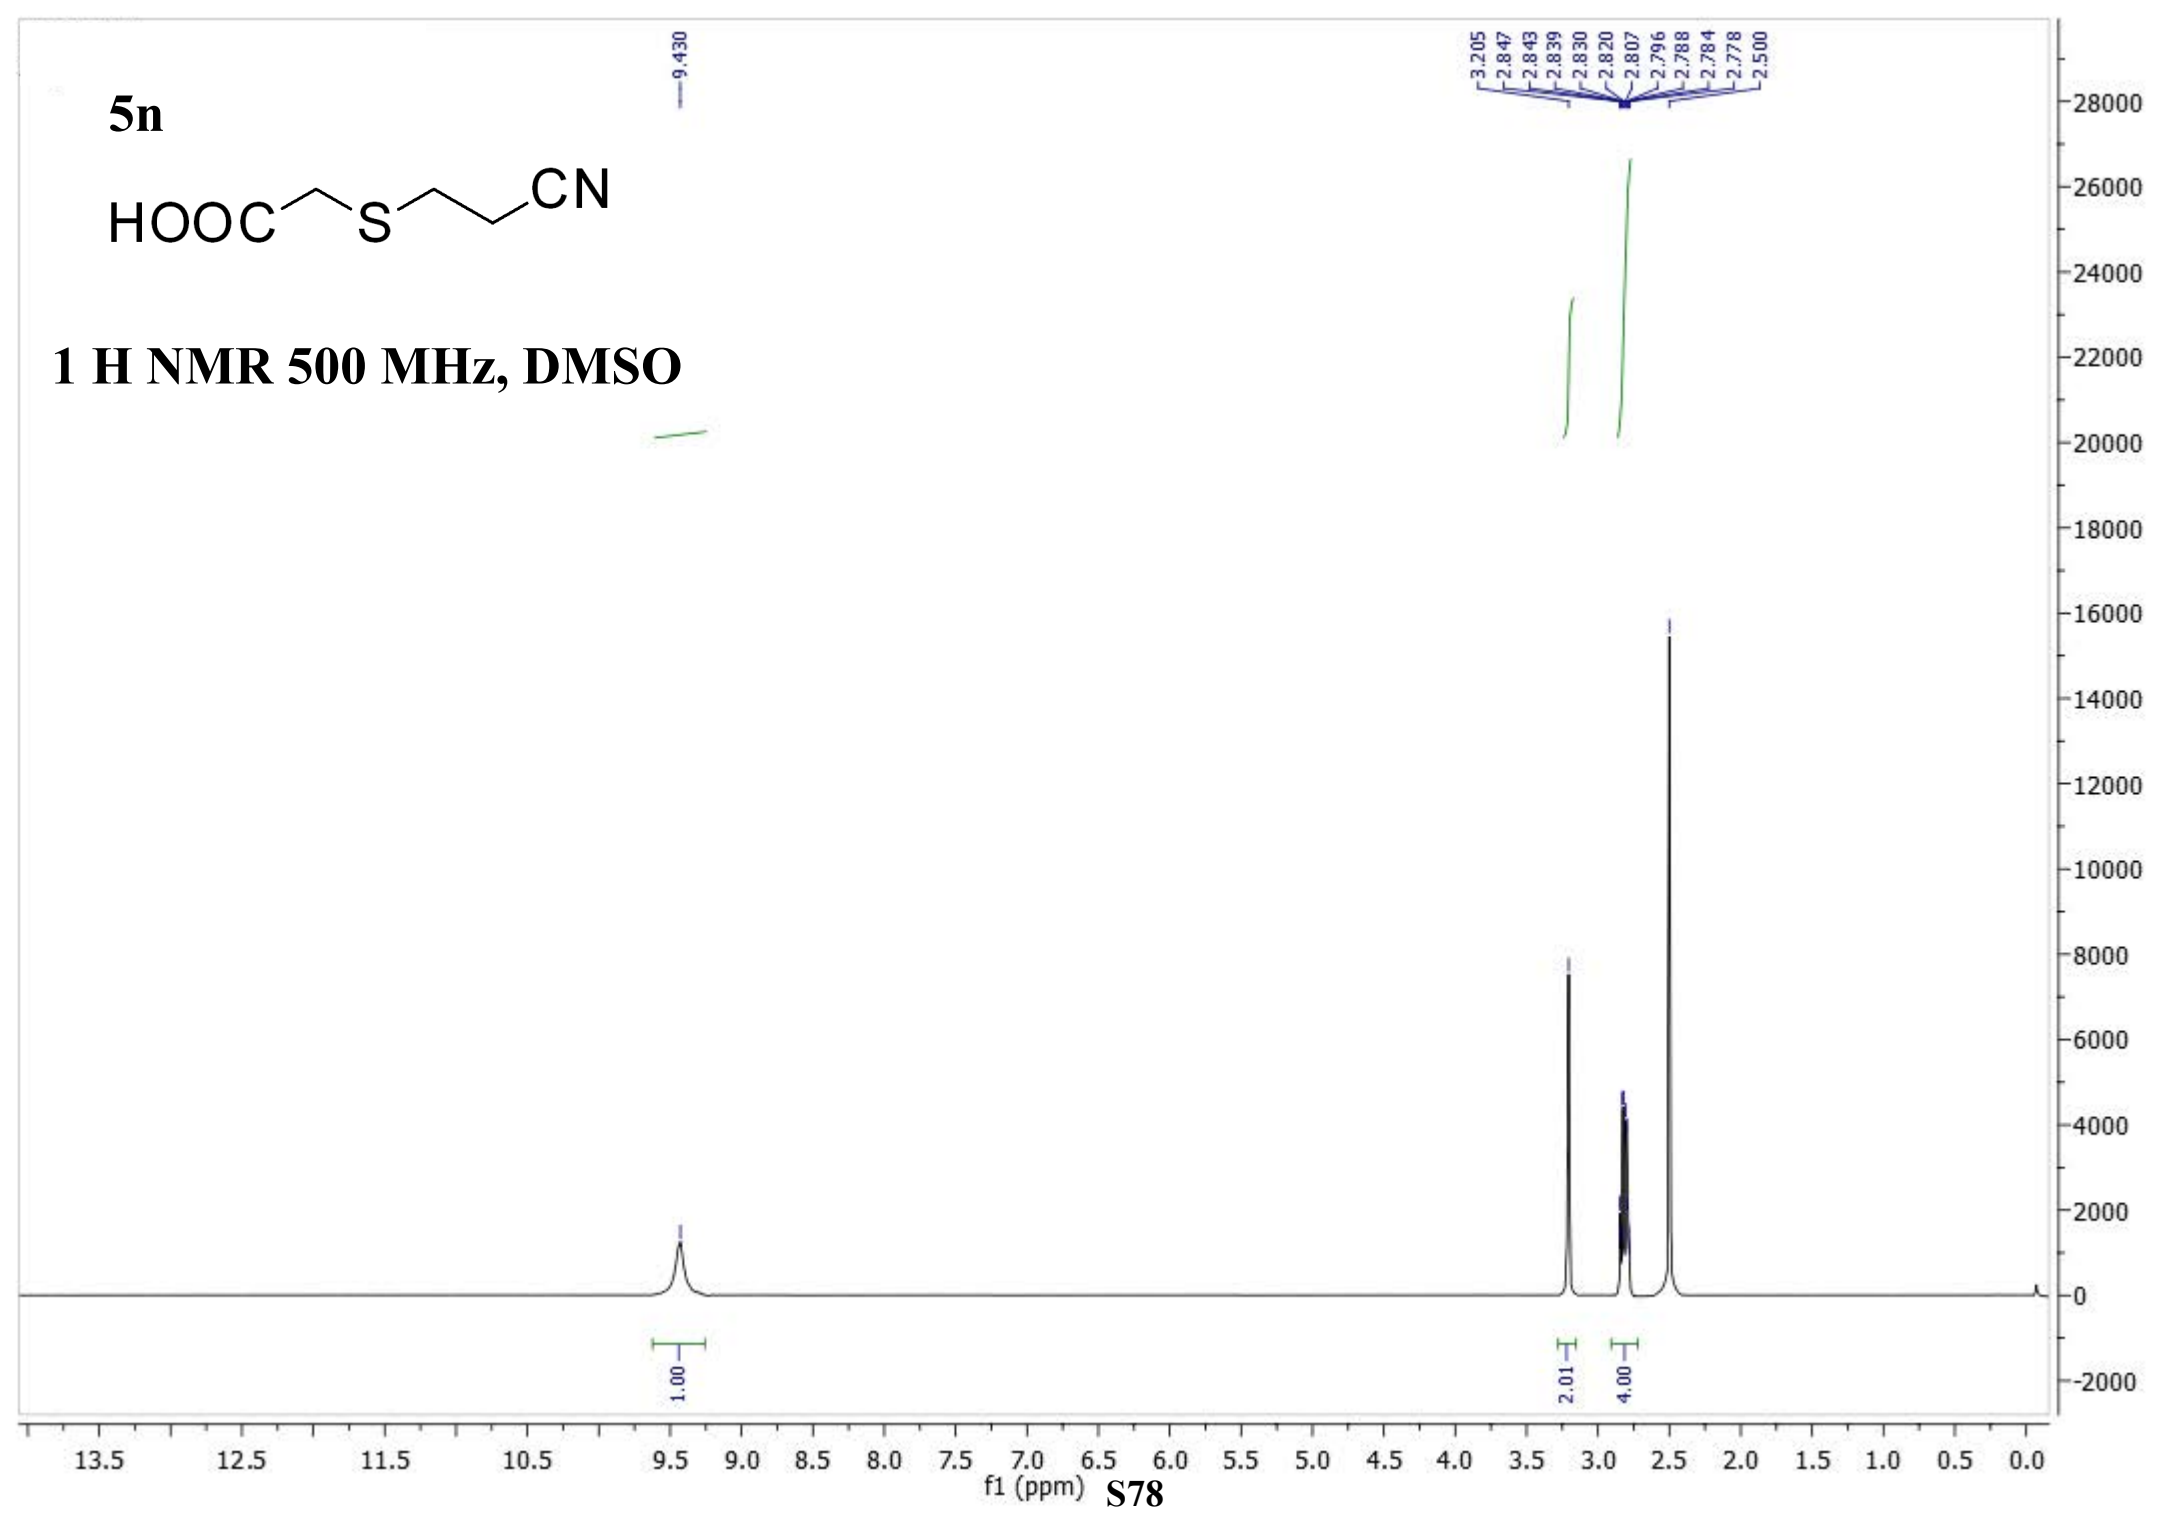

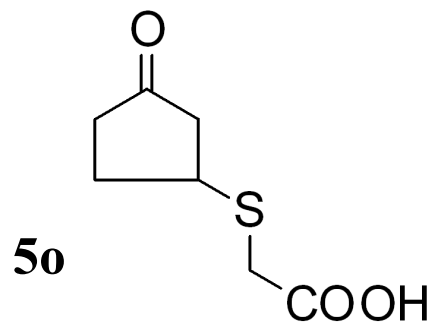

**<sup>1</sup>H NMR 500 MHz, DMSO**

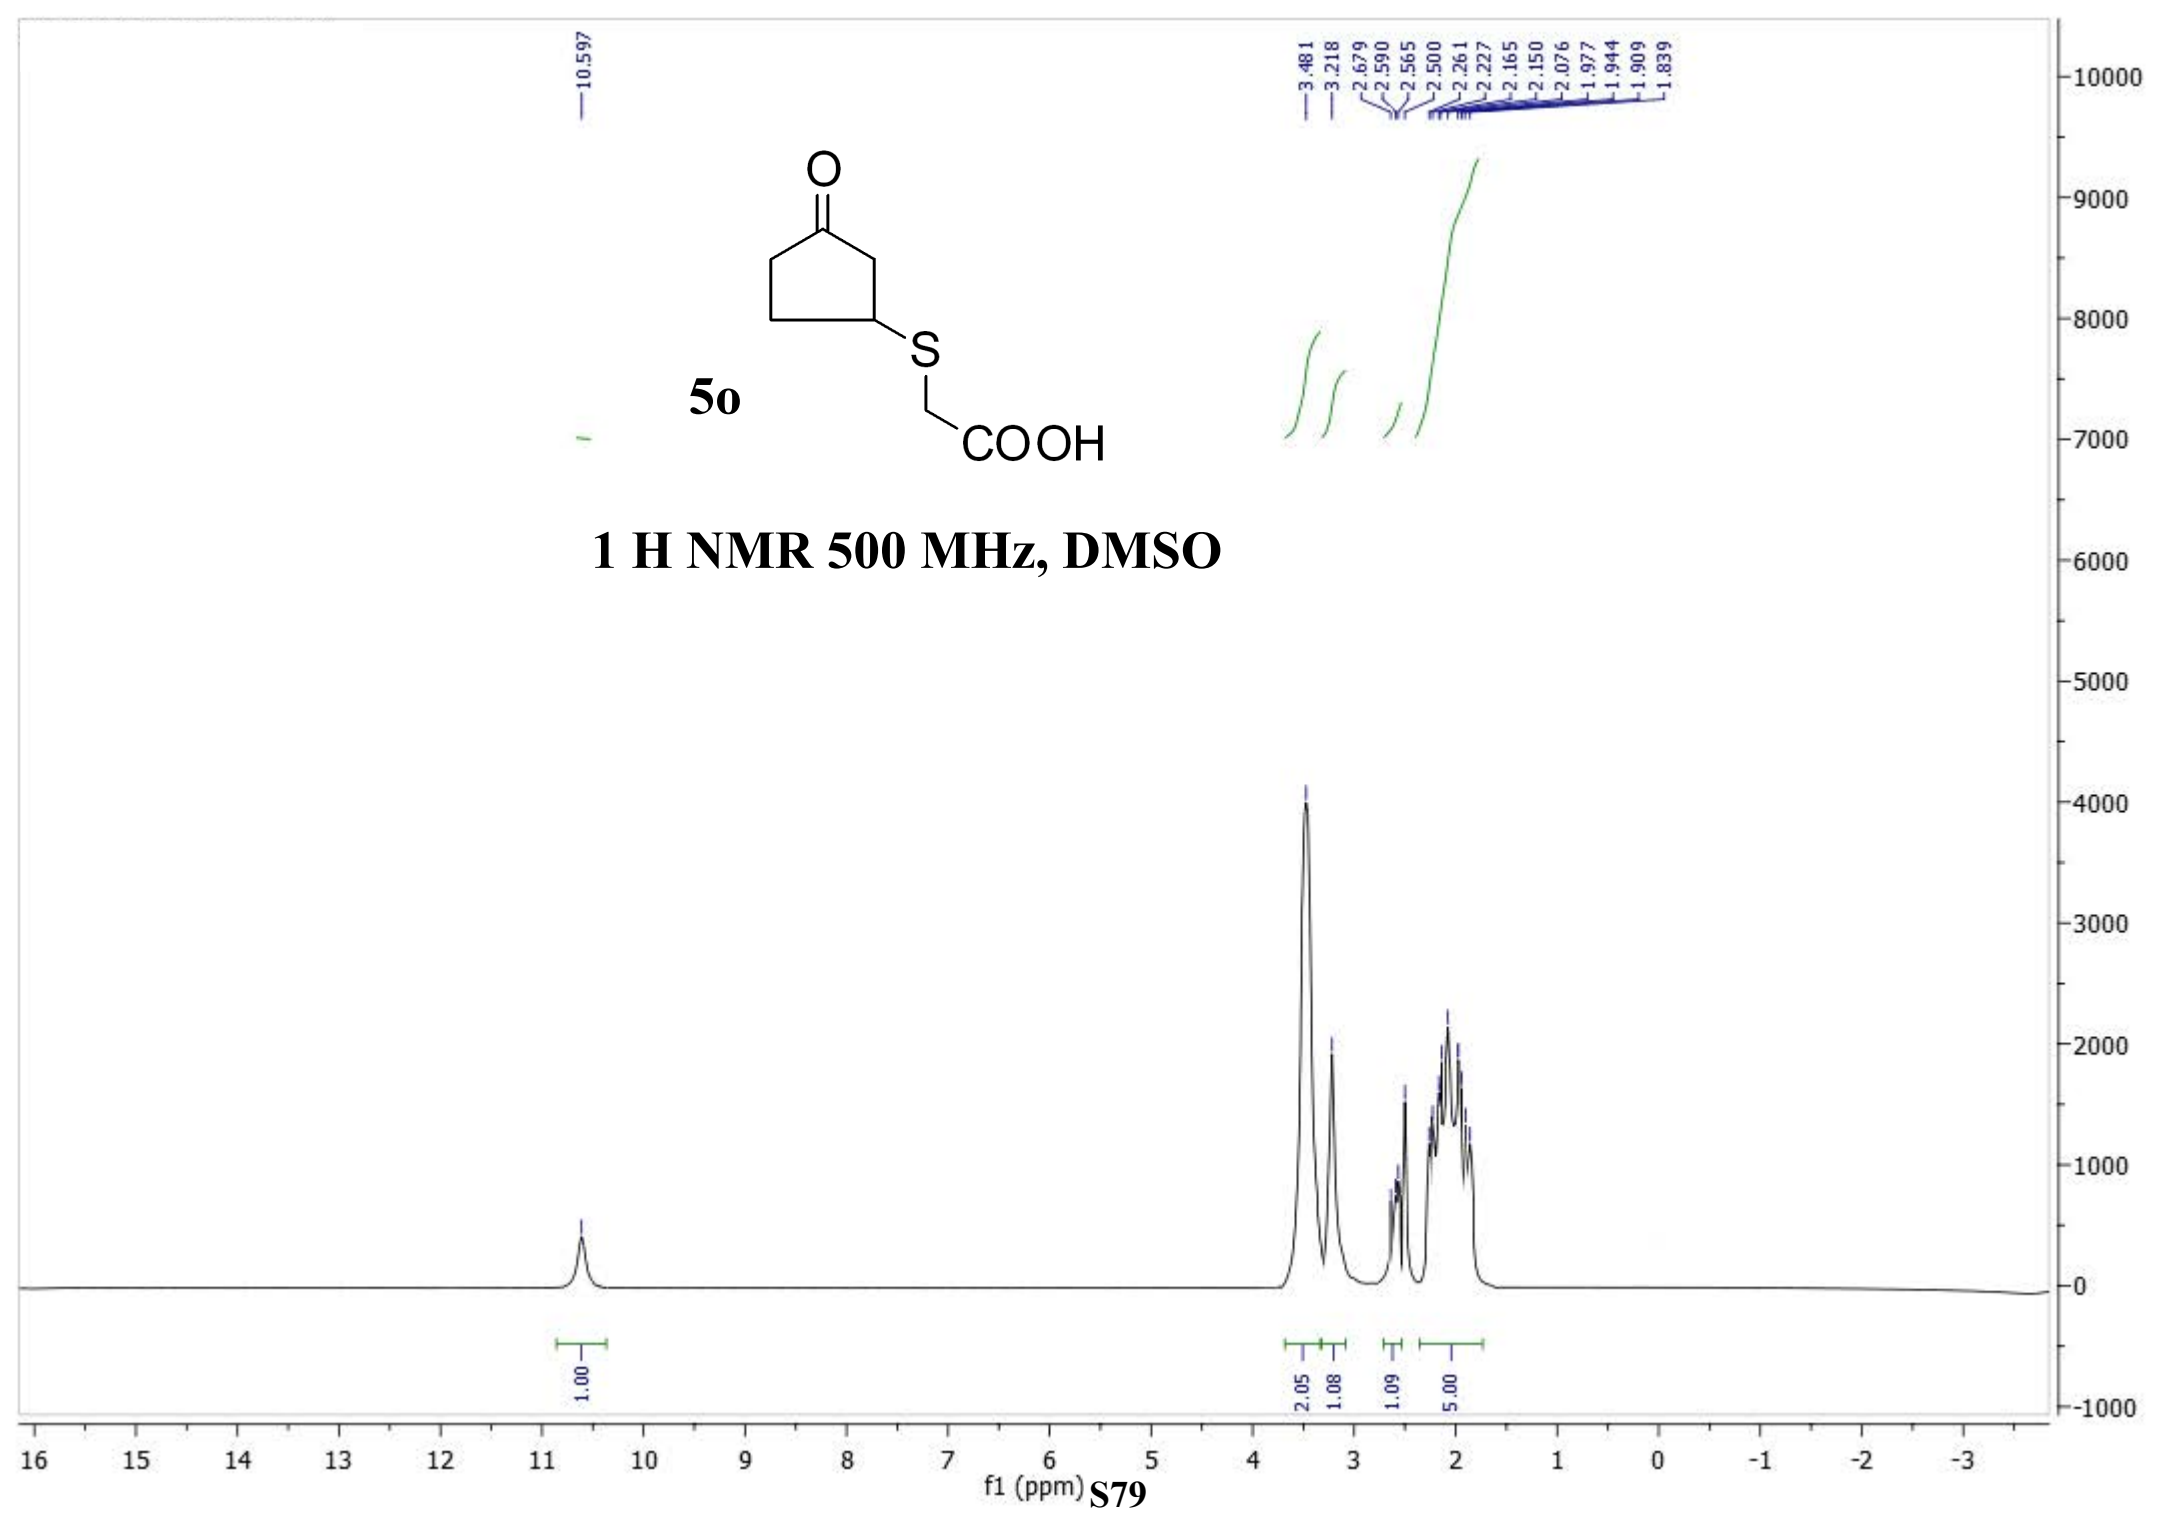

**5p**

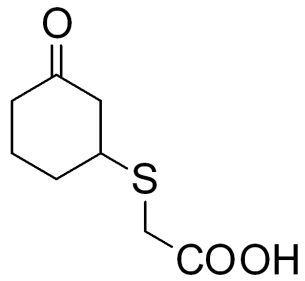

**1 H NMR 500 MHz, DMSO**

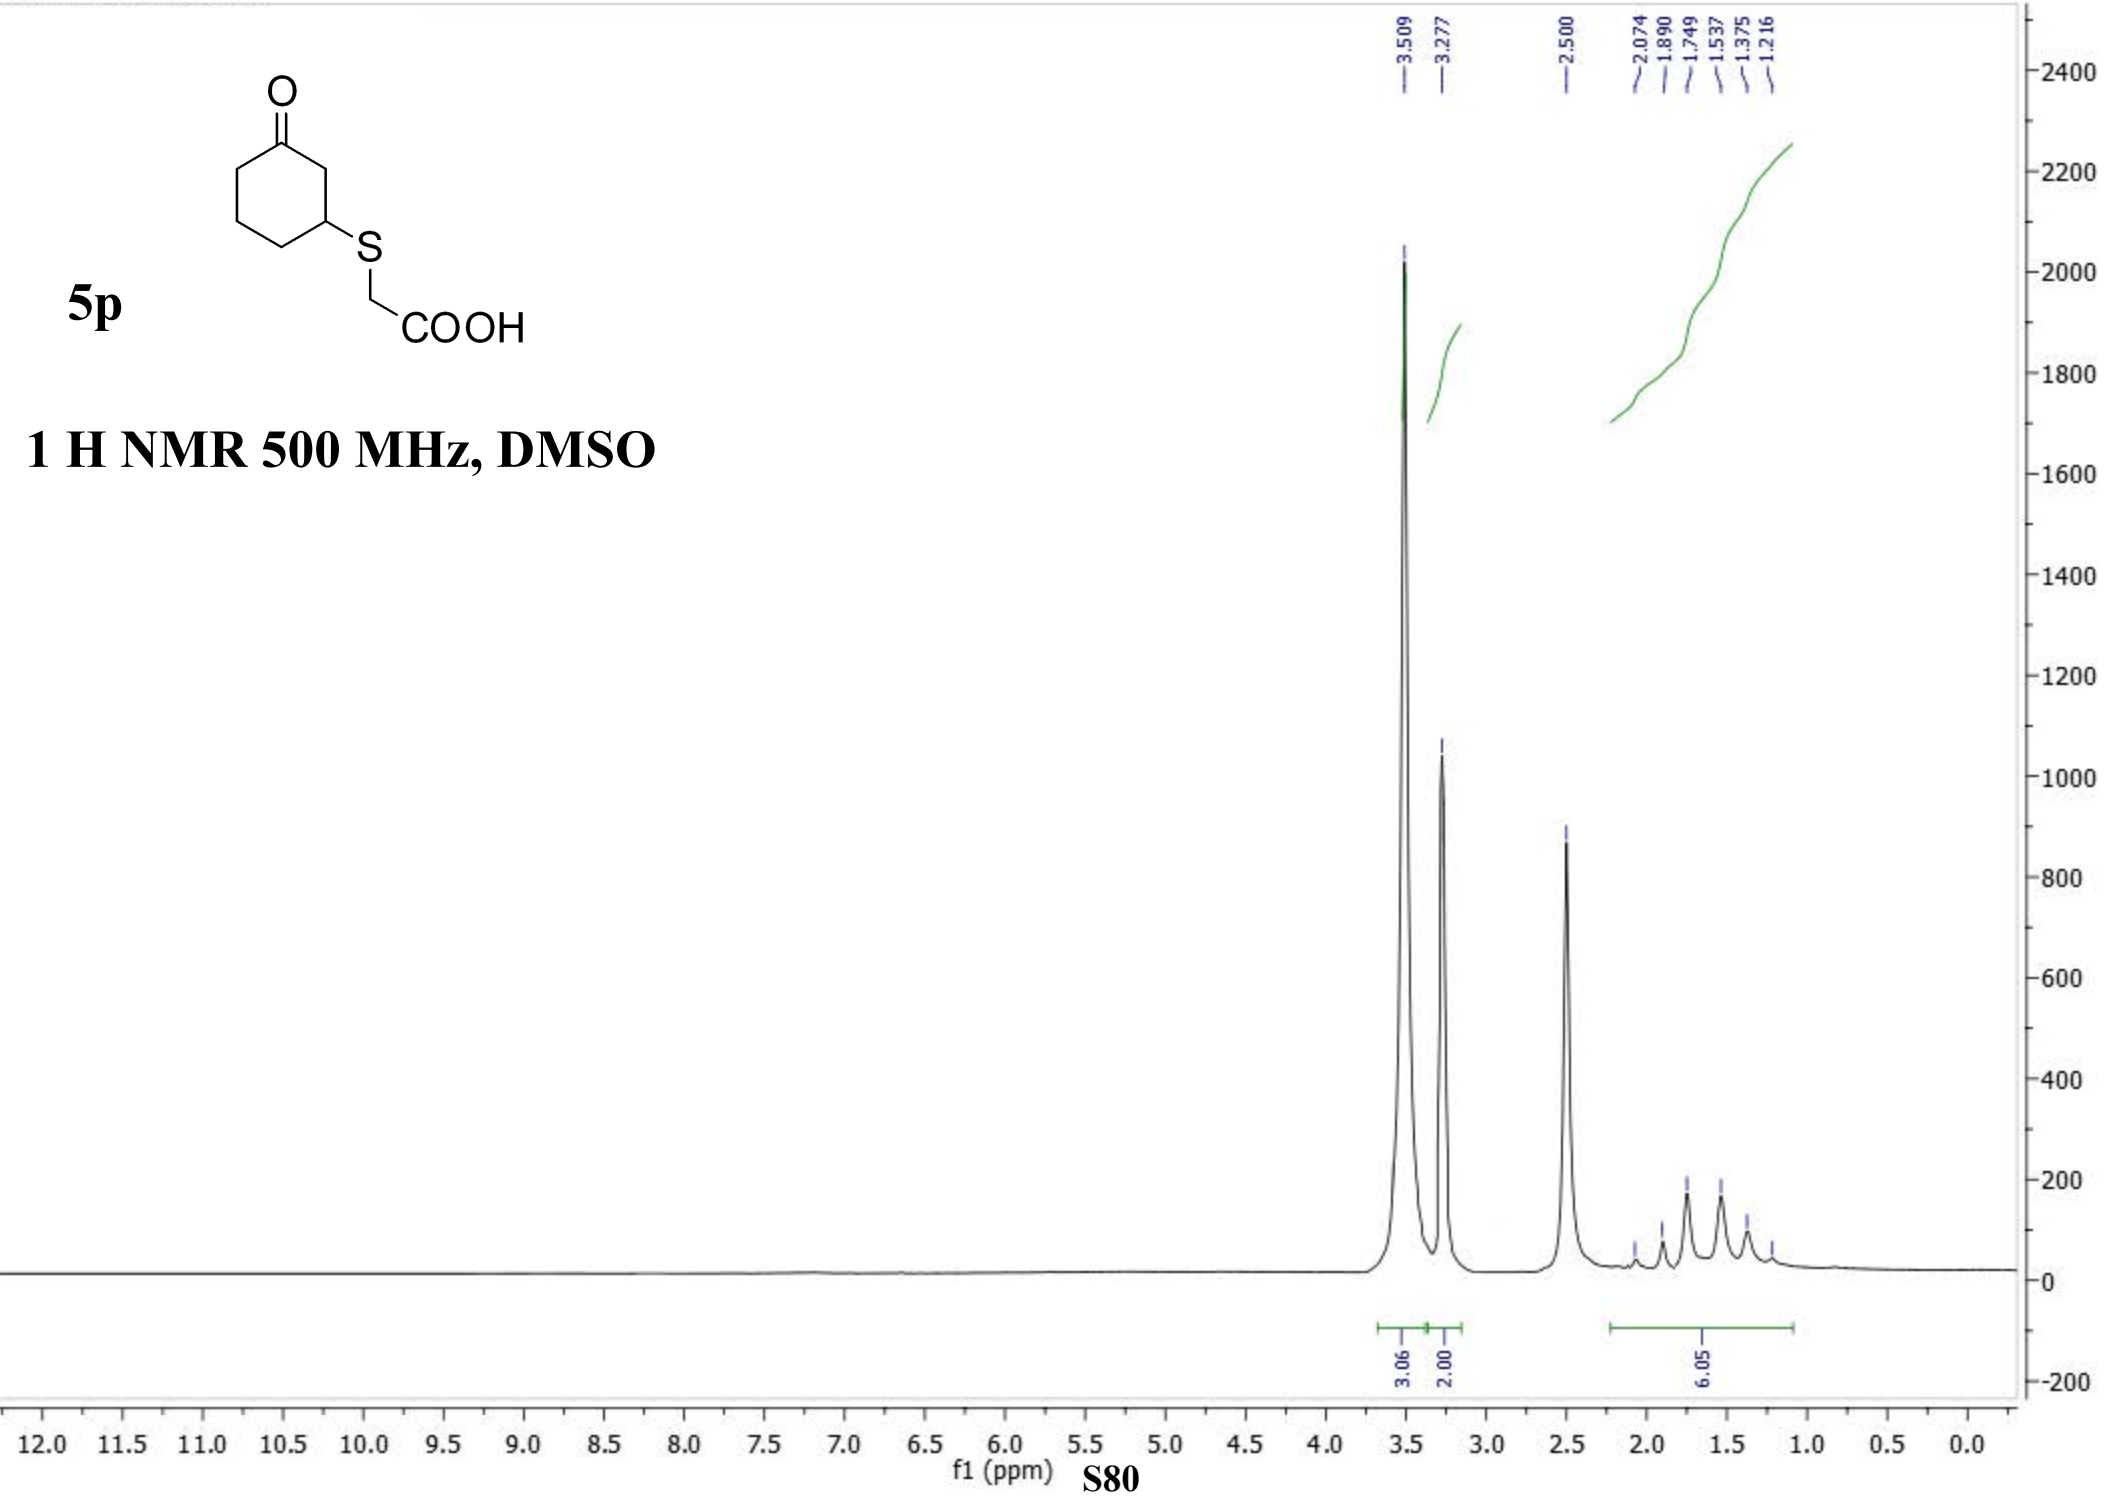



**5q**

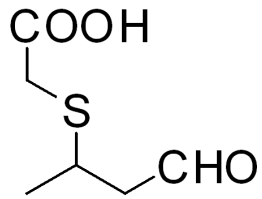

**<sup>1</sup>H NMR 500 MHz, DMSO**

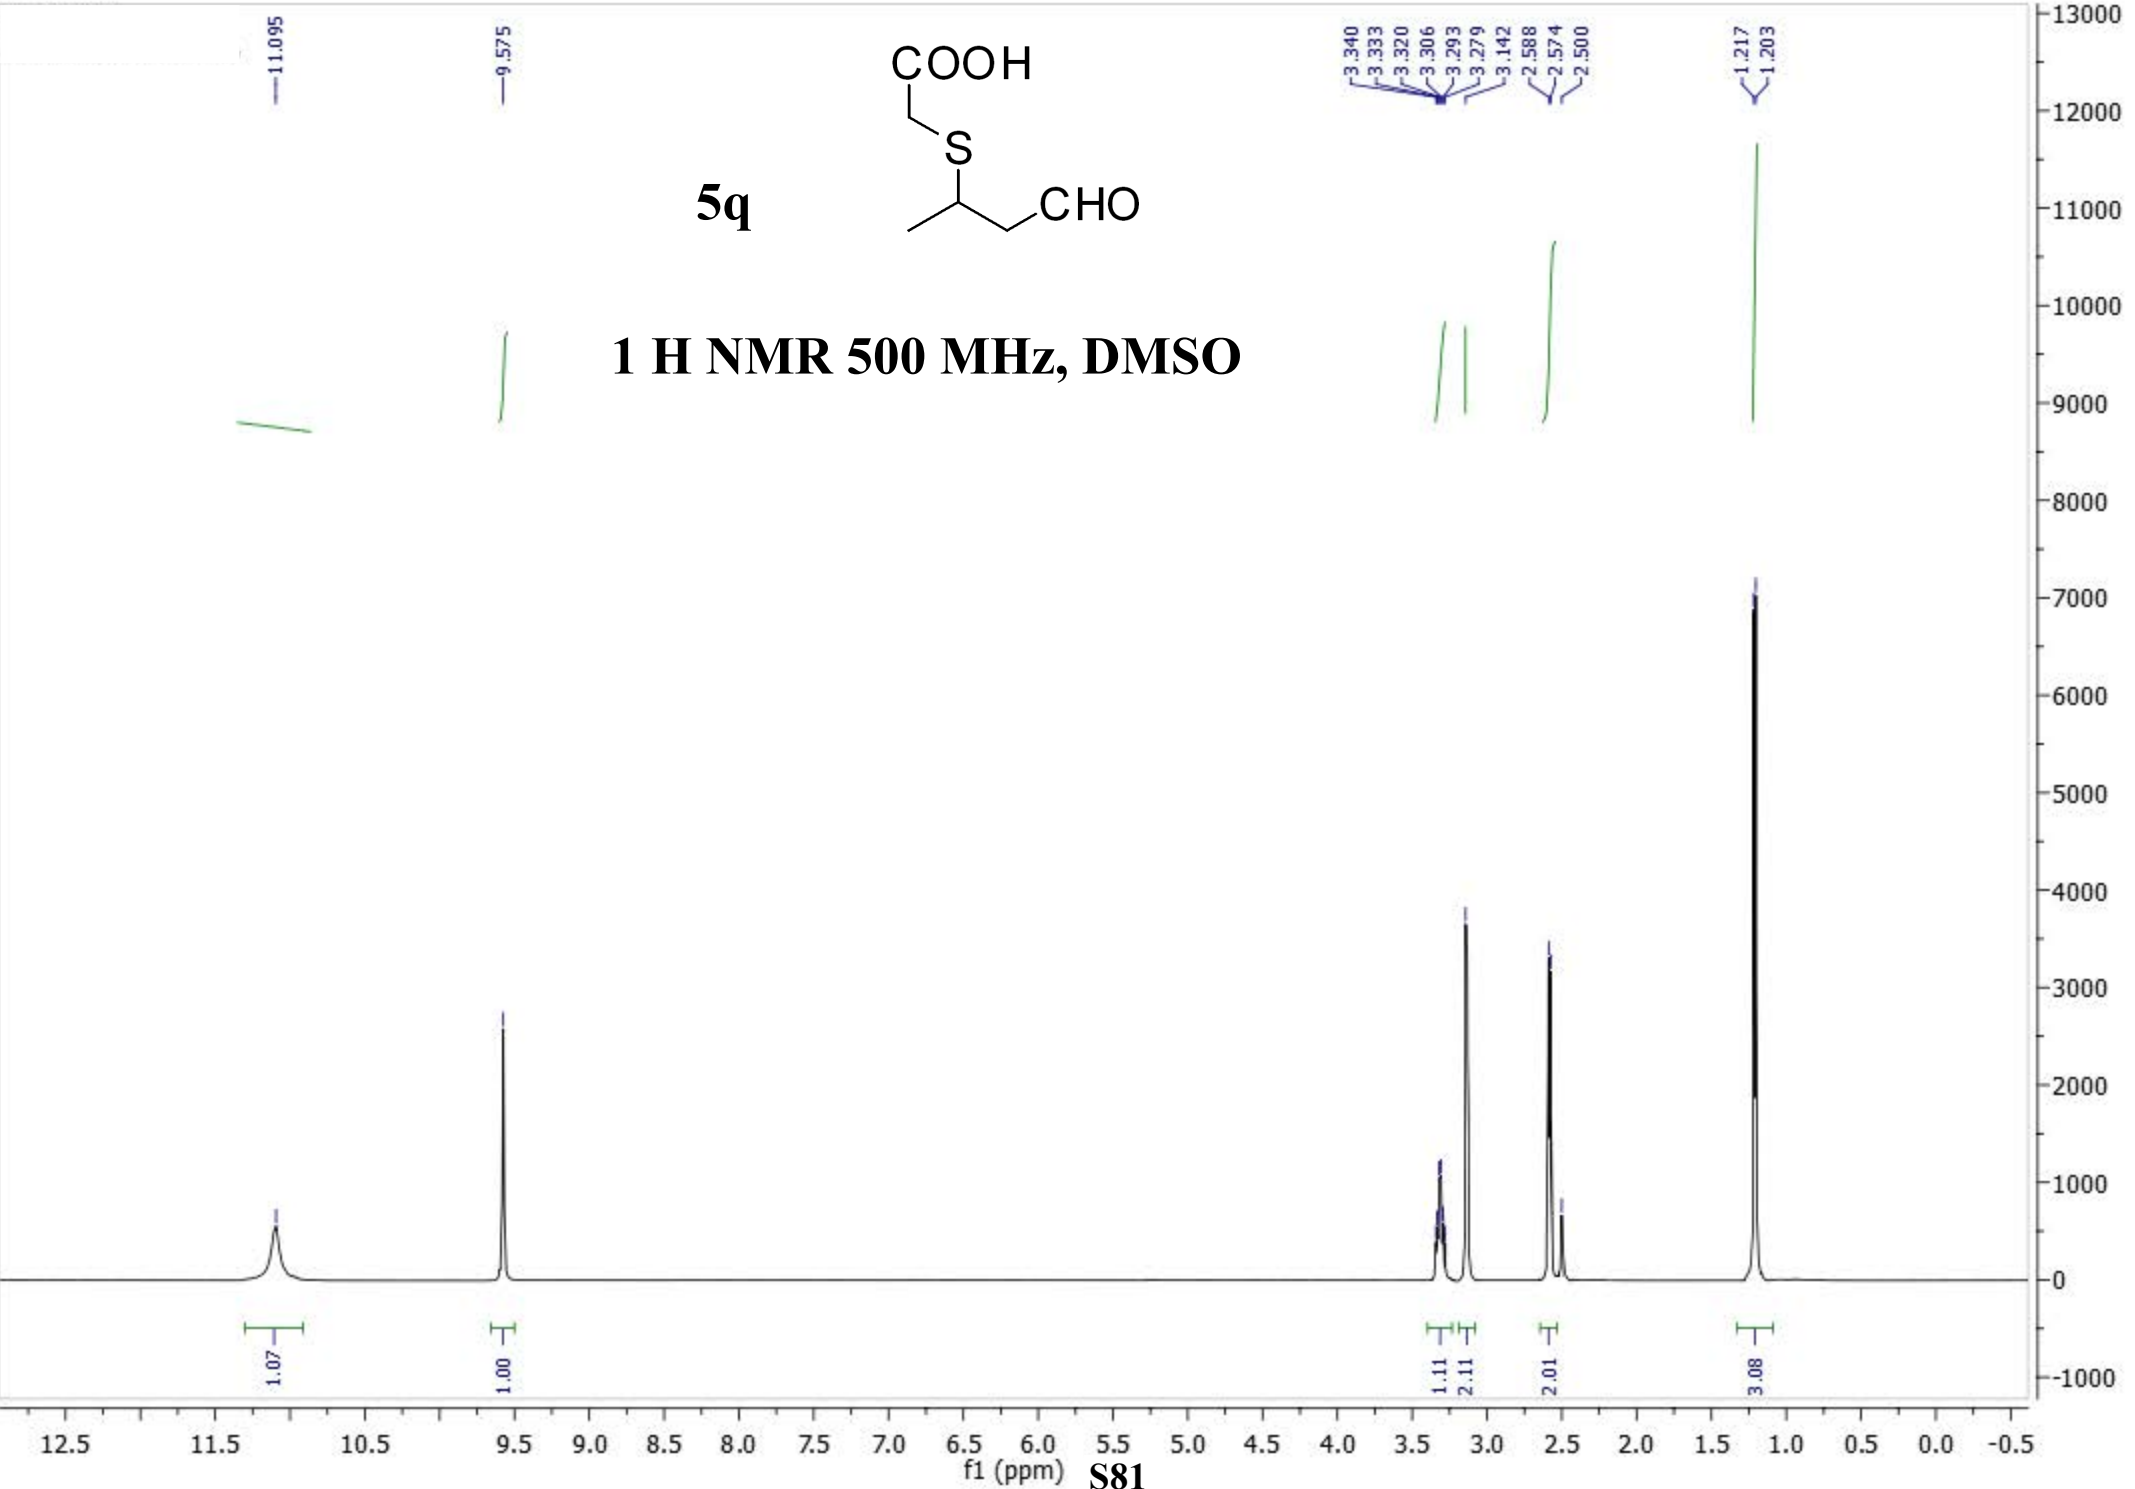

# VI. 13 C NMR Spectra 5a -5q

5a

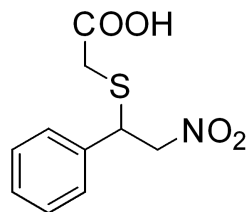

13 C NMR 125 MHz, CDCl<sub>3</sub>

175.526  
135.911  
129.150  
128.851  
127.916  
78.419  
77.455  
77.200  
76.945  
46.475  
32.480

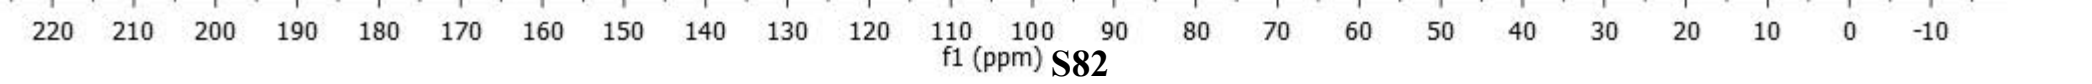

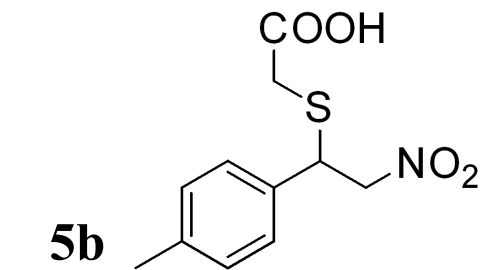

**$^{13}\text{C}$  NMR 125 MHz,  $\text{CDCl}_3$**

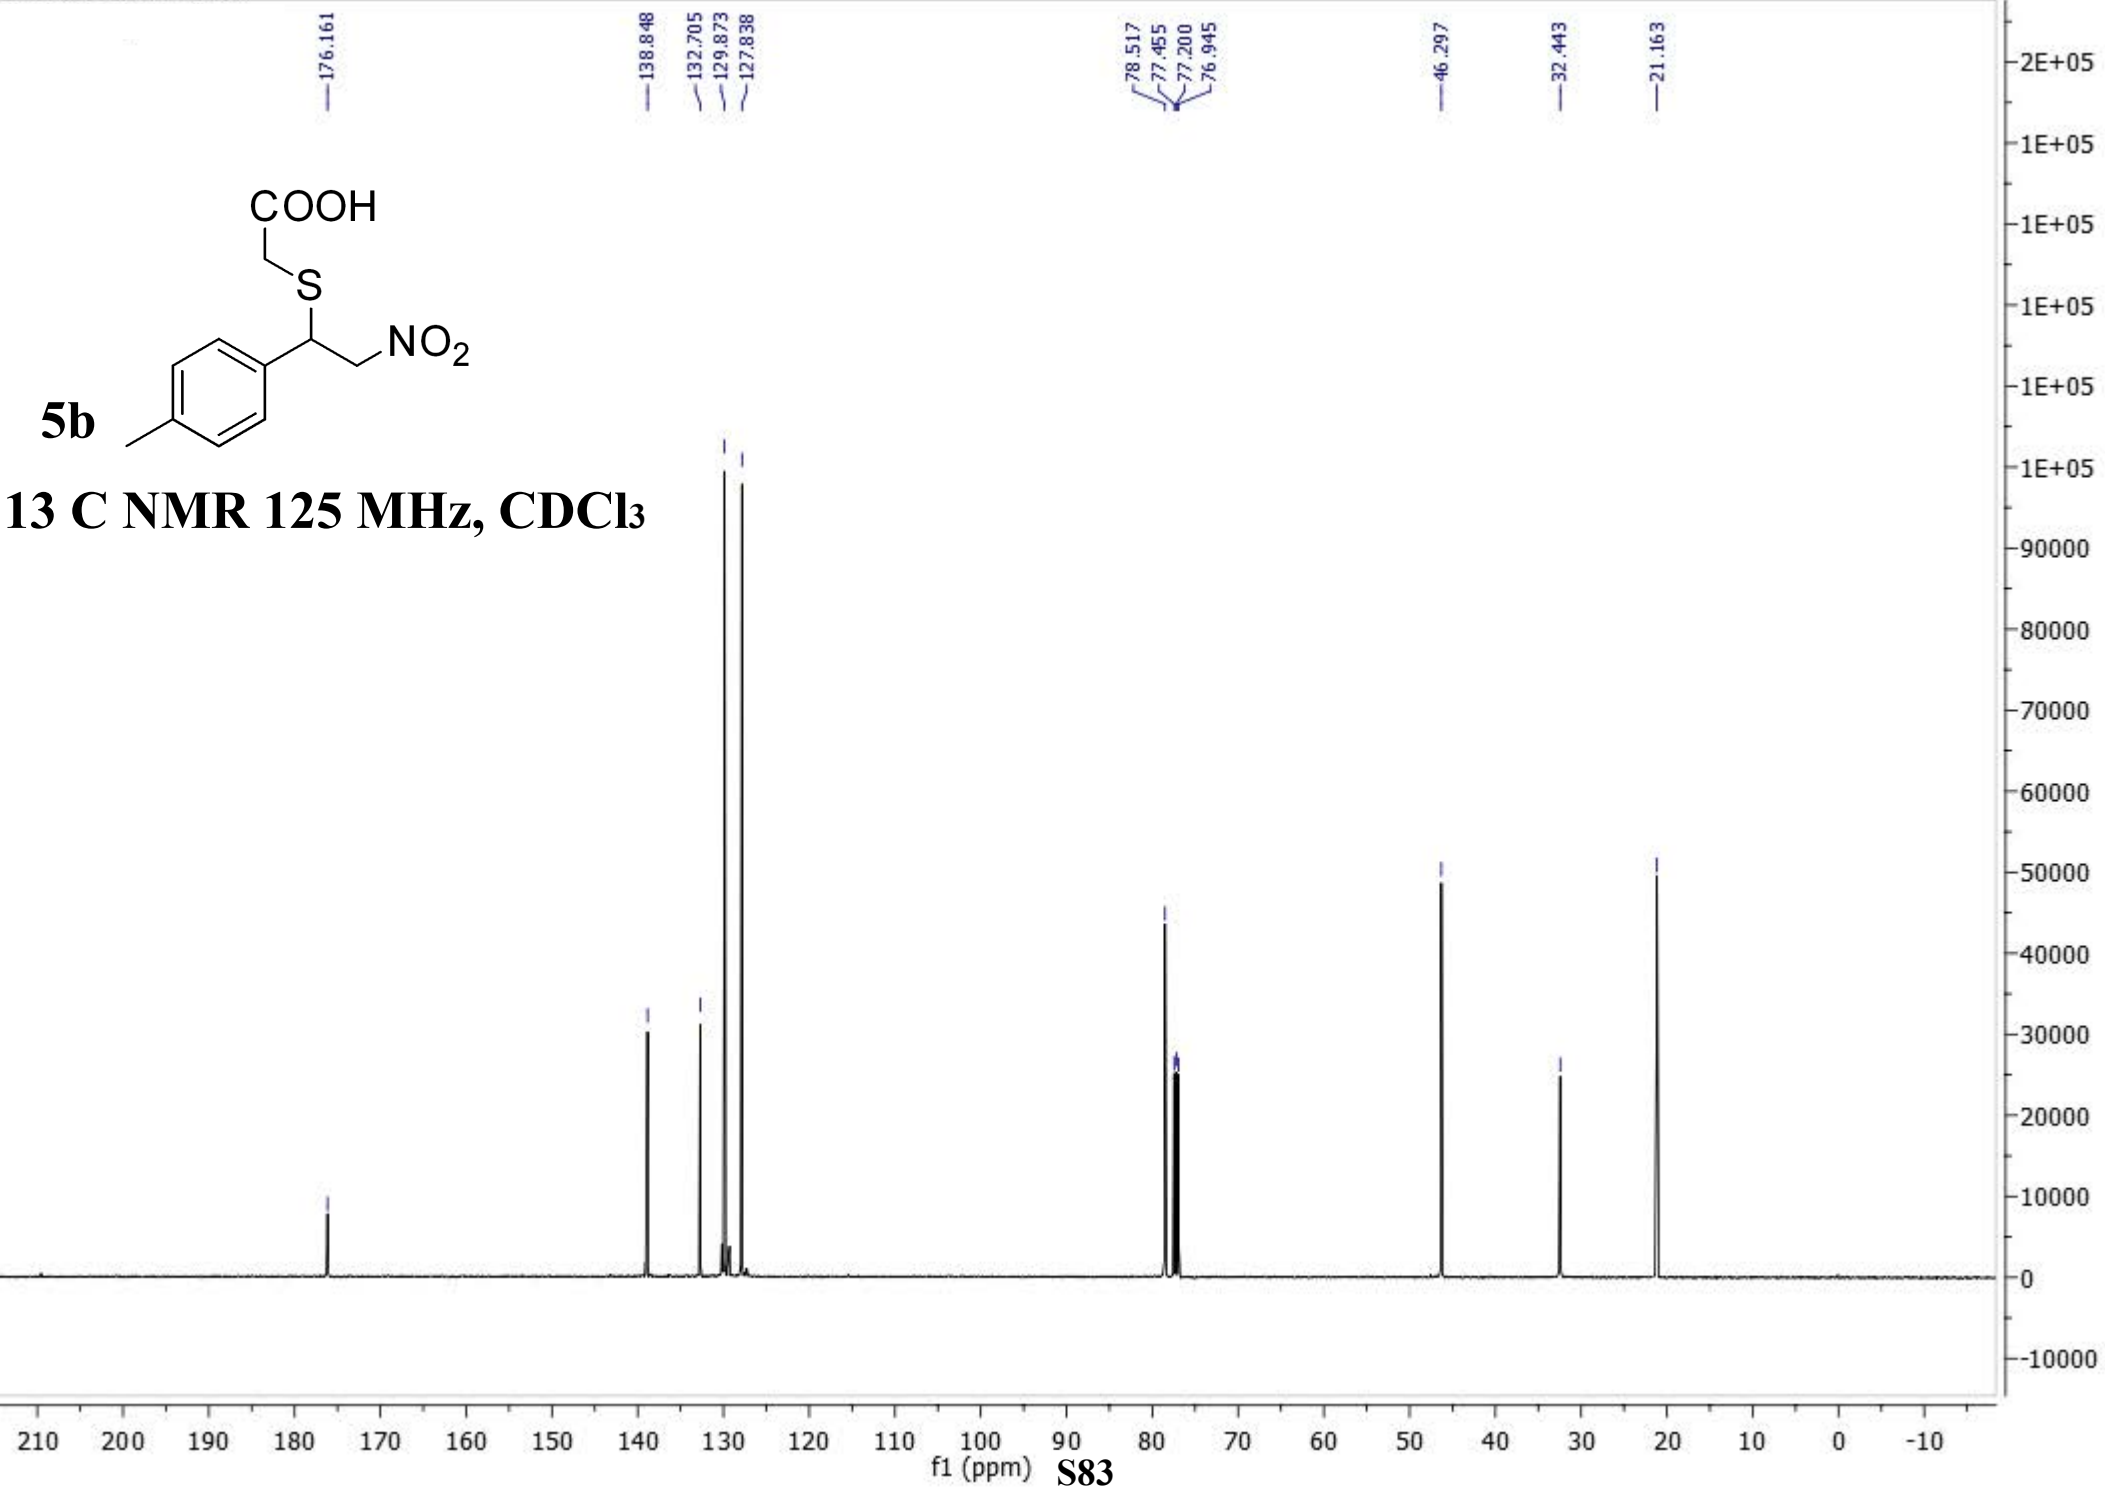

**5c**

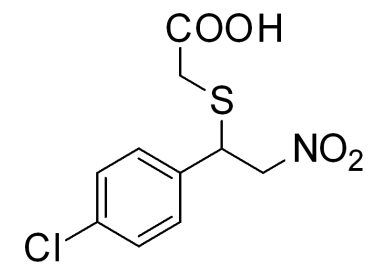

**13 C NMR 125 MHz, DMSO**

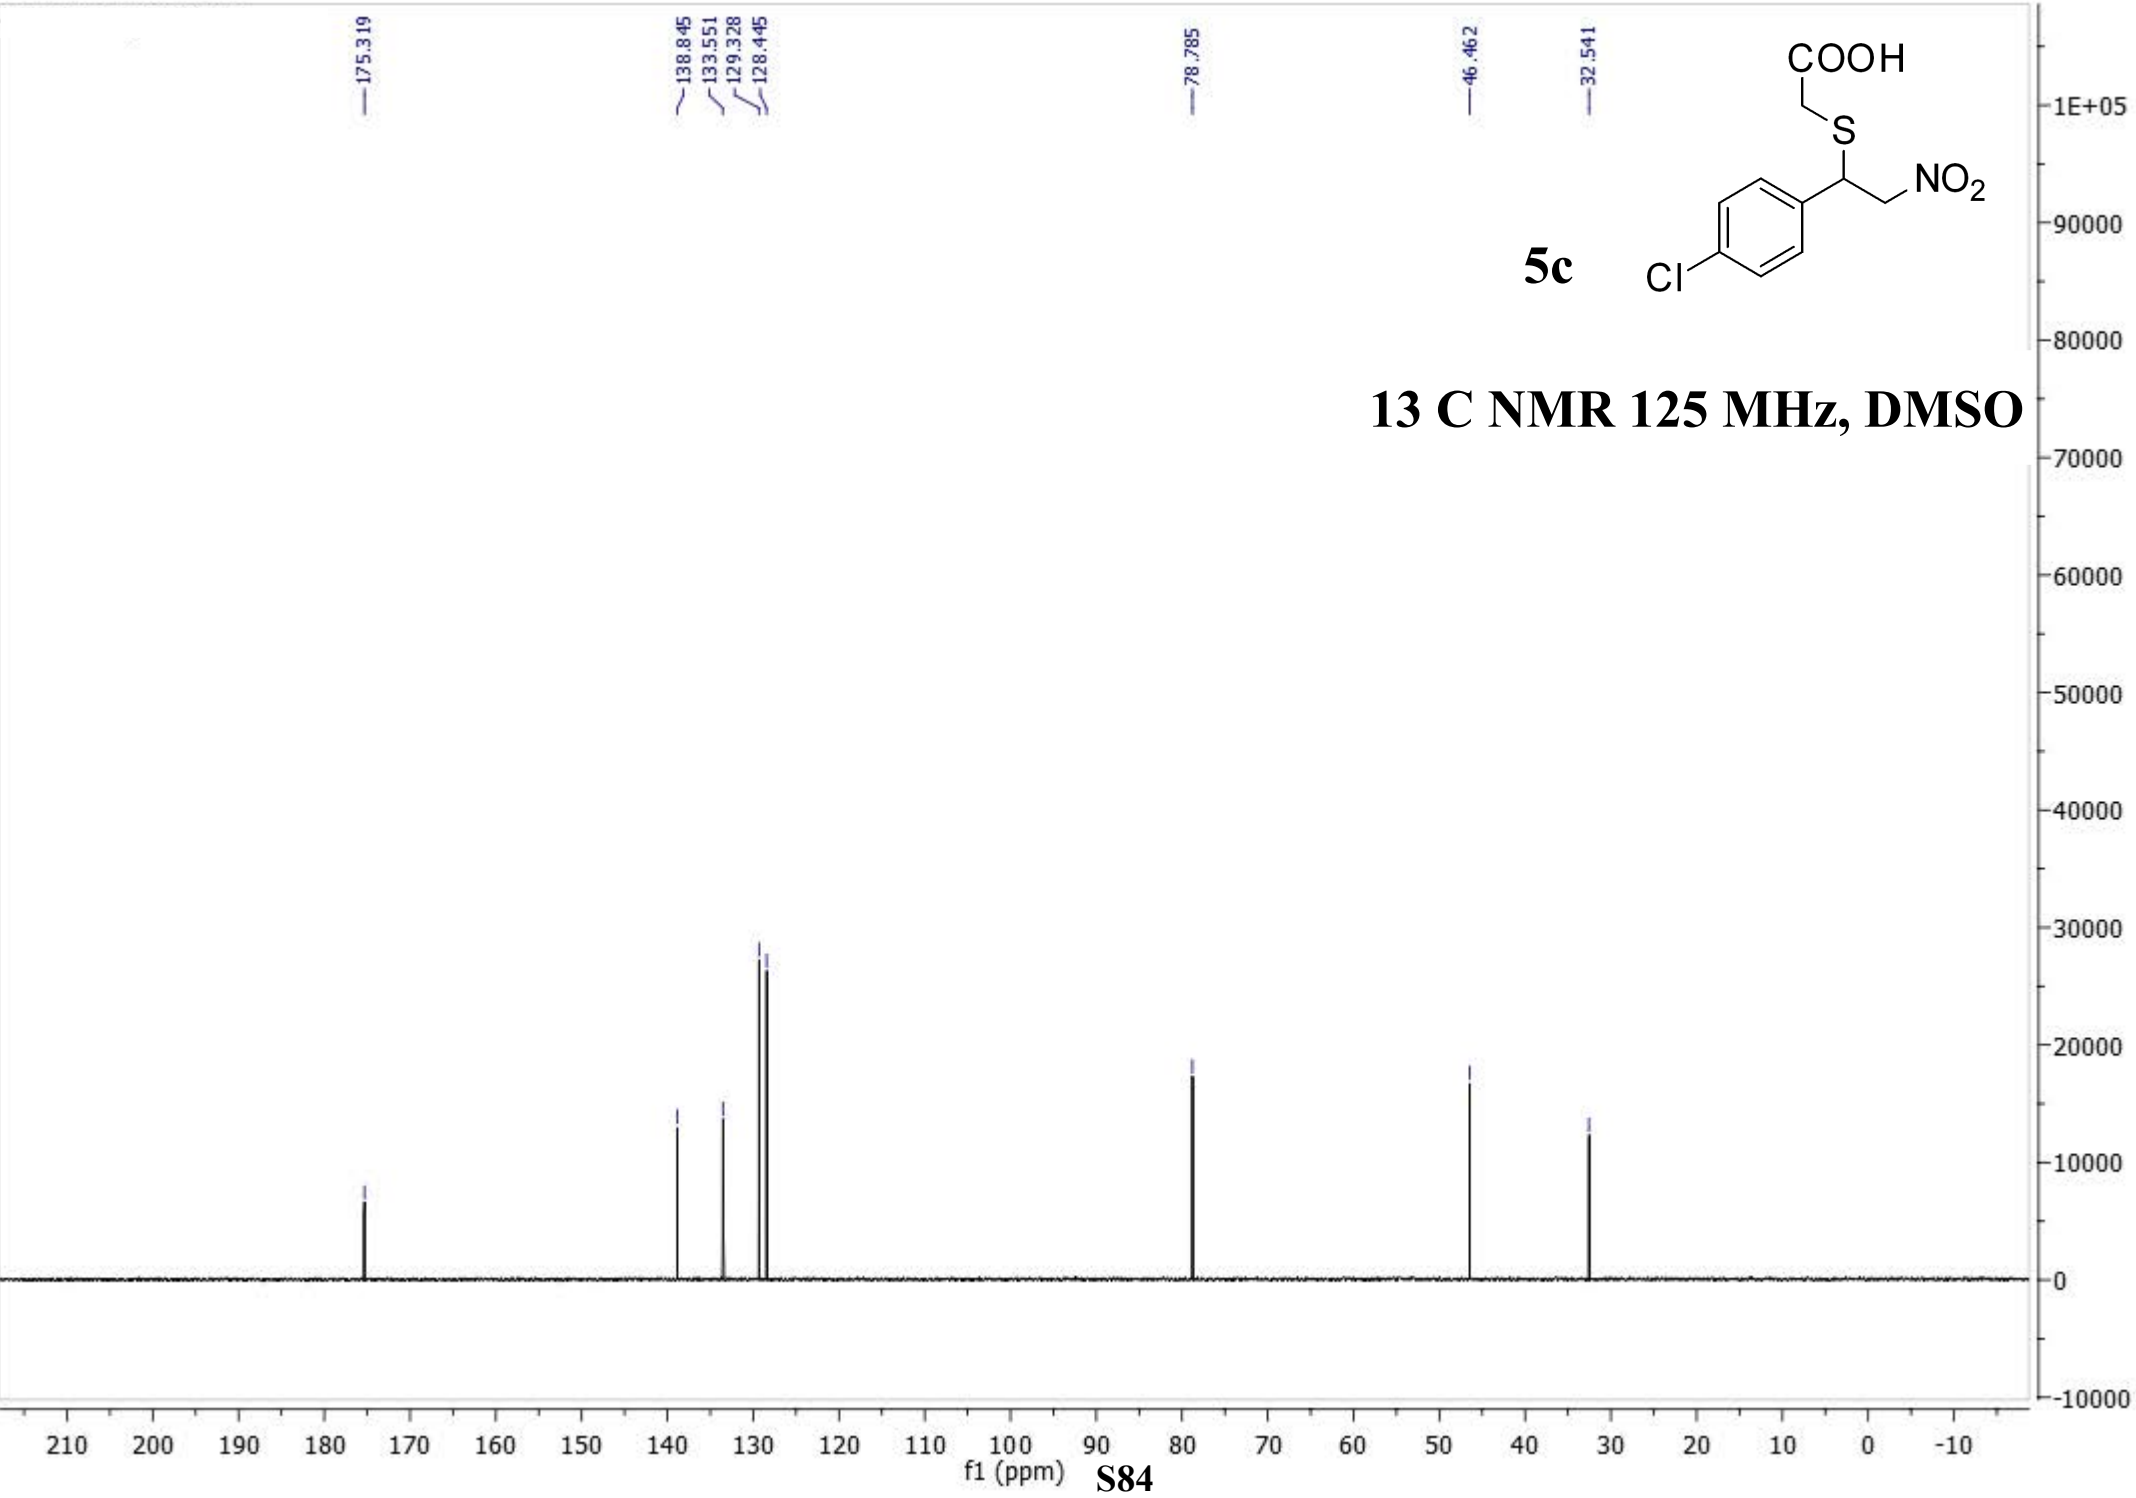

**5d**

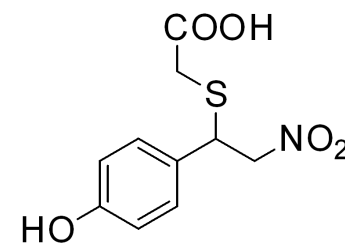

**13 C NMR 125 MHz, DMSO**

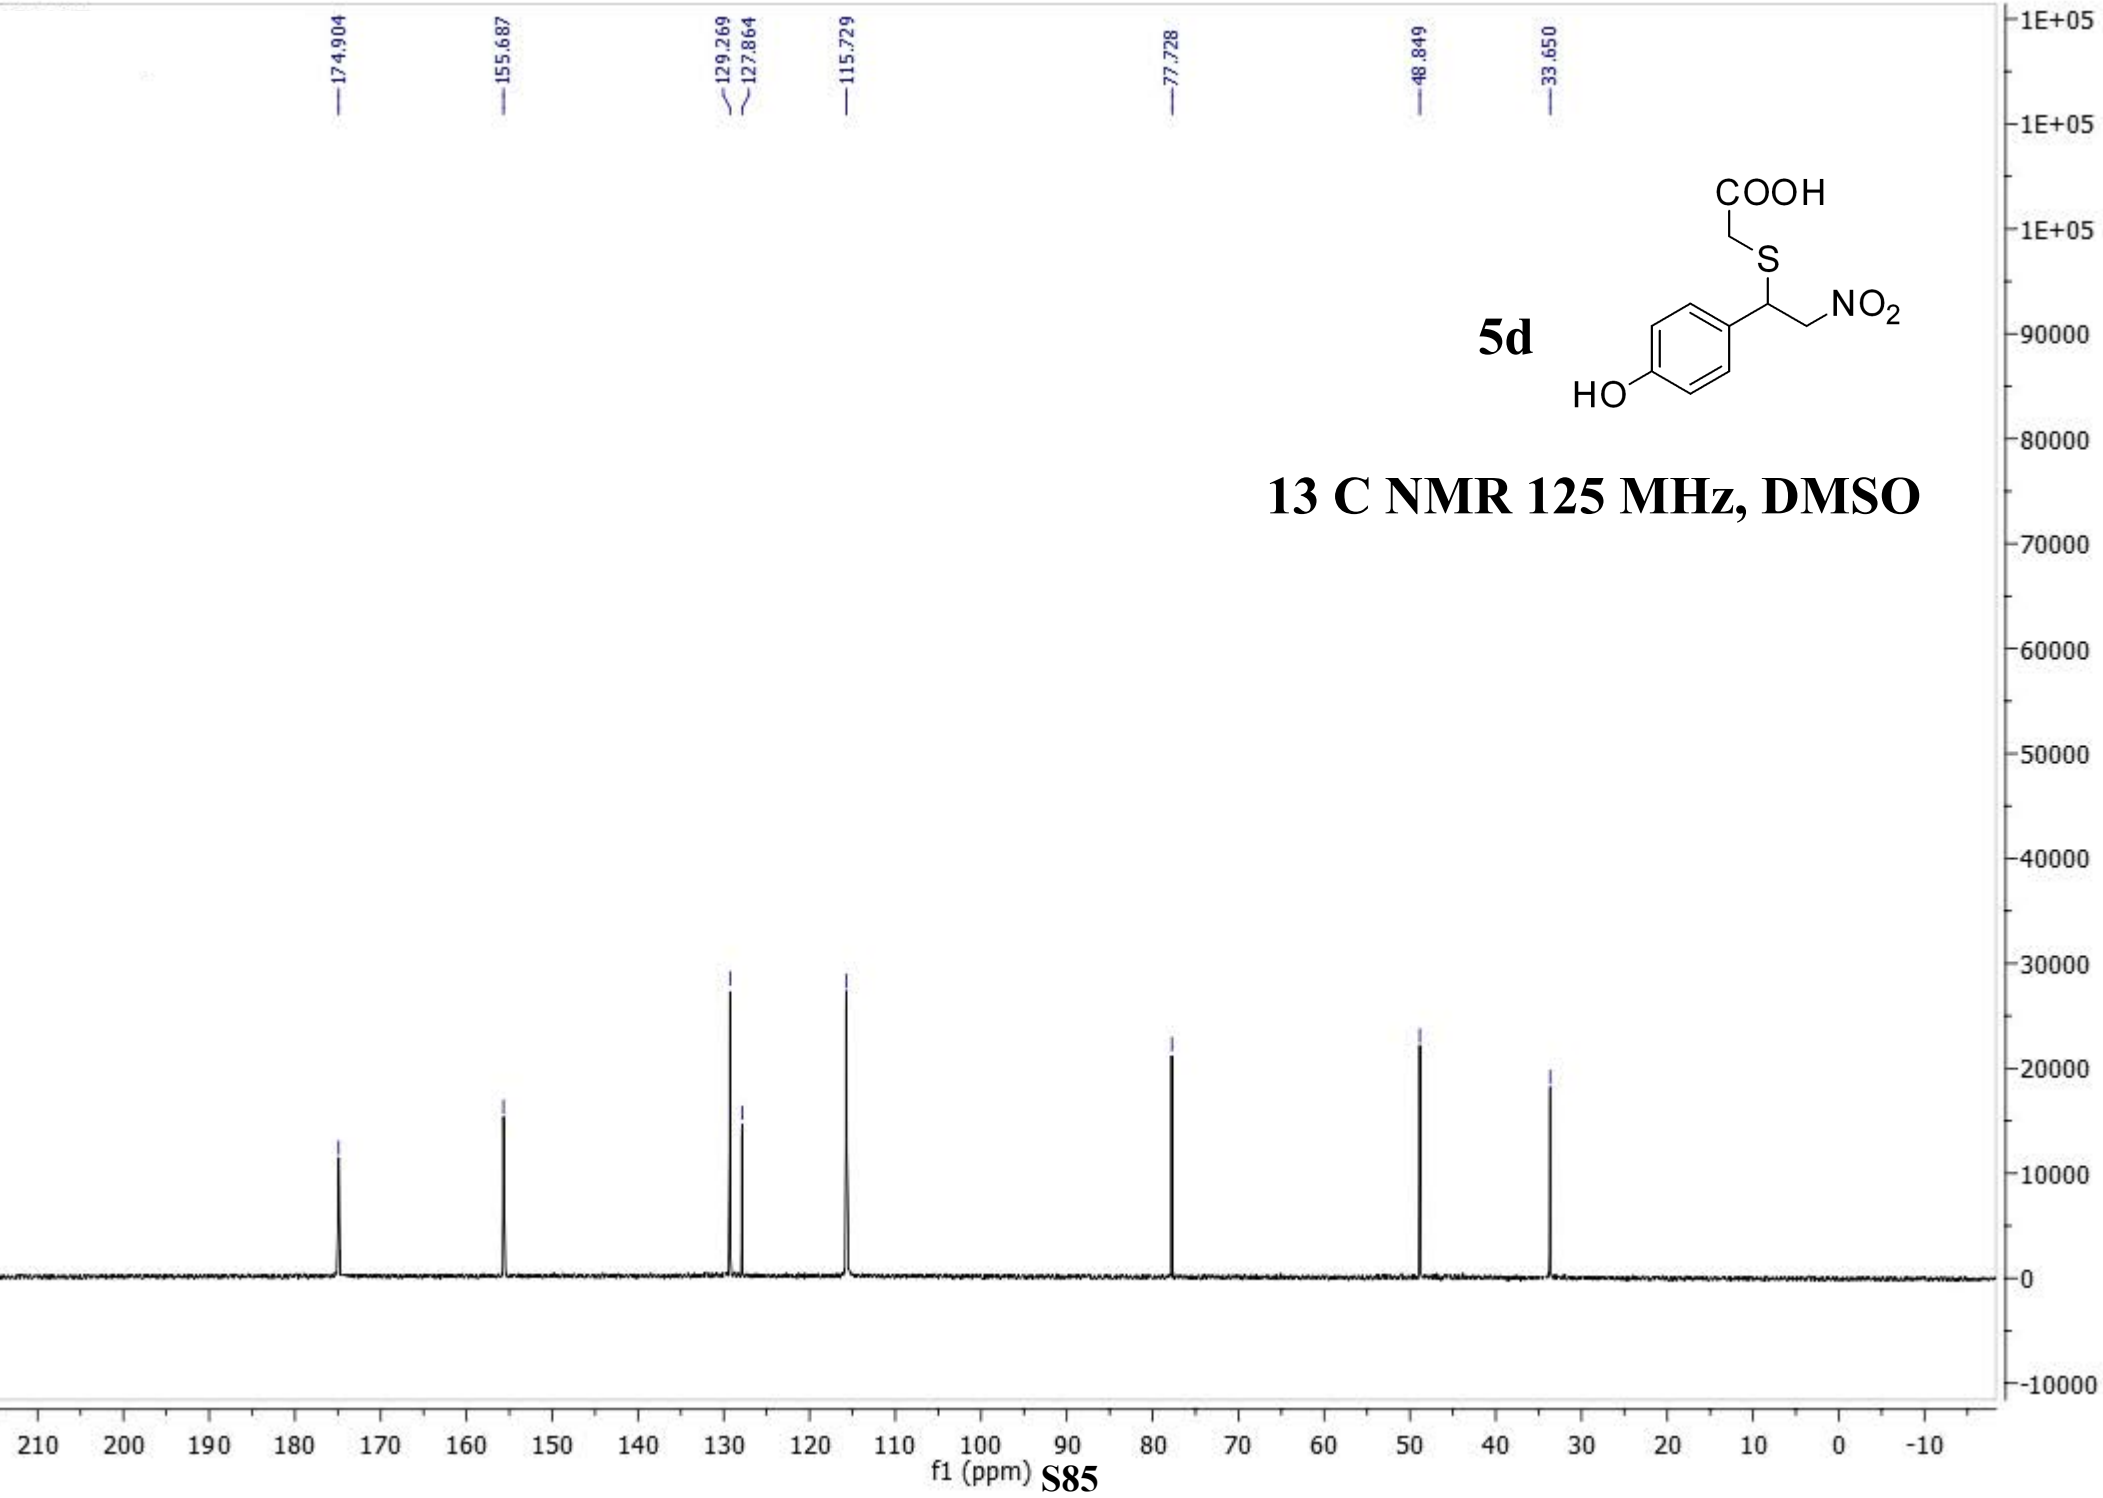

**5e**

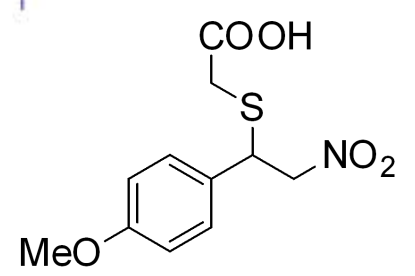

**13 C NMR 125 MHz, DMSO**

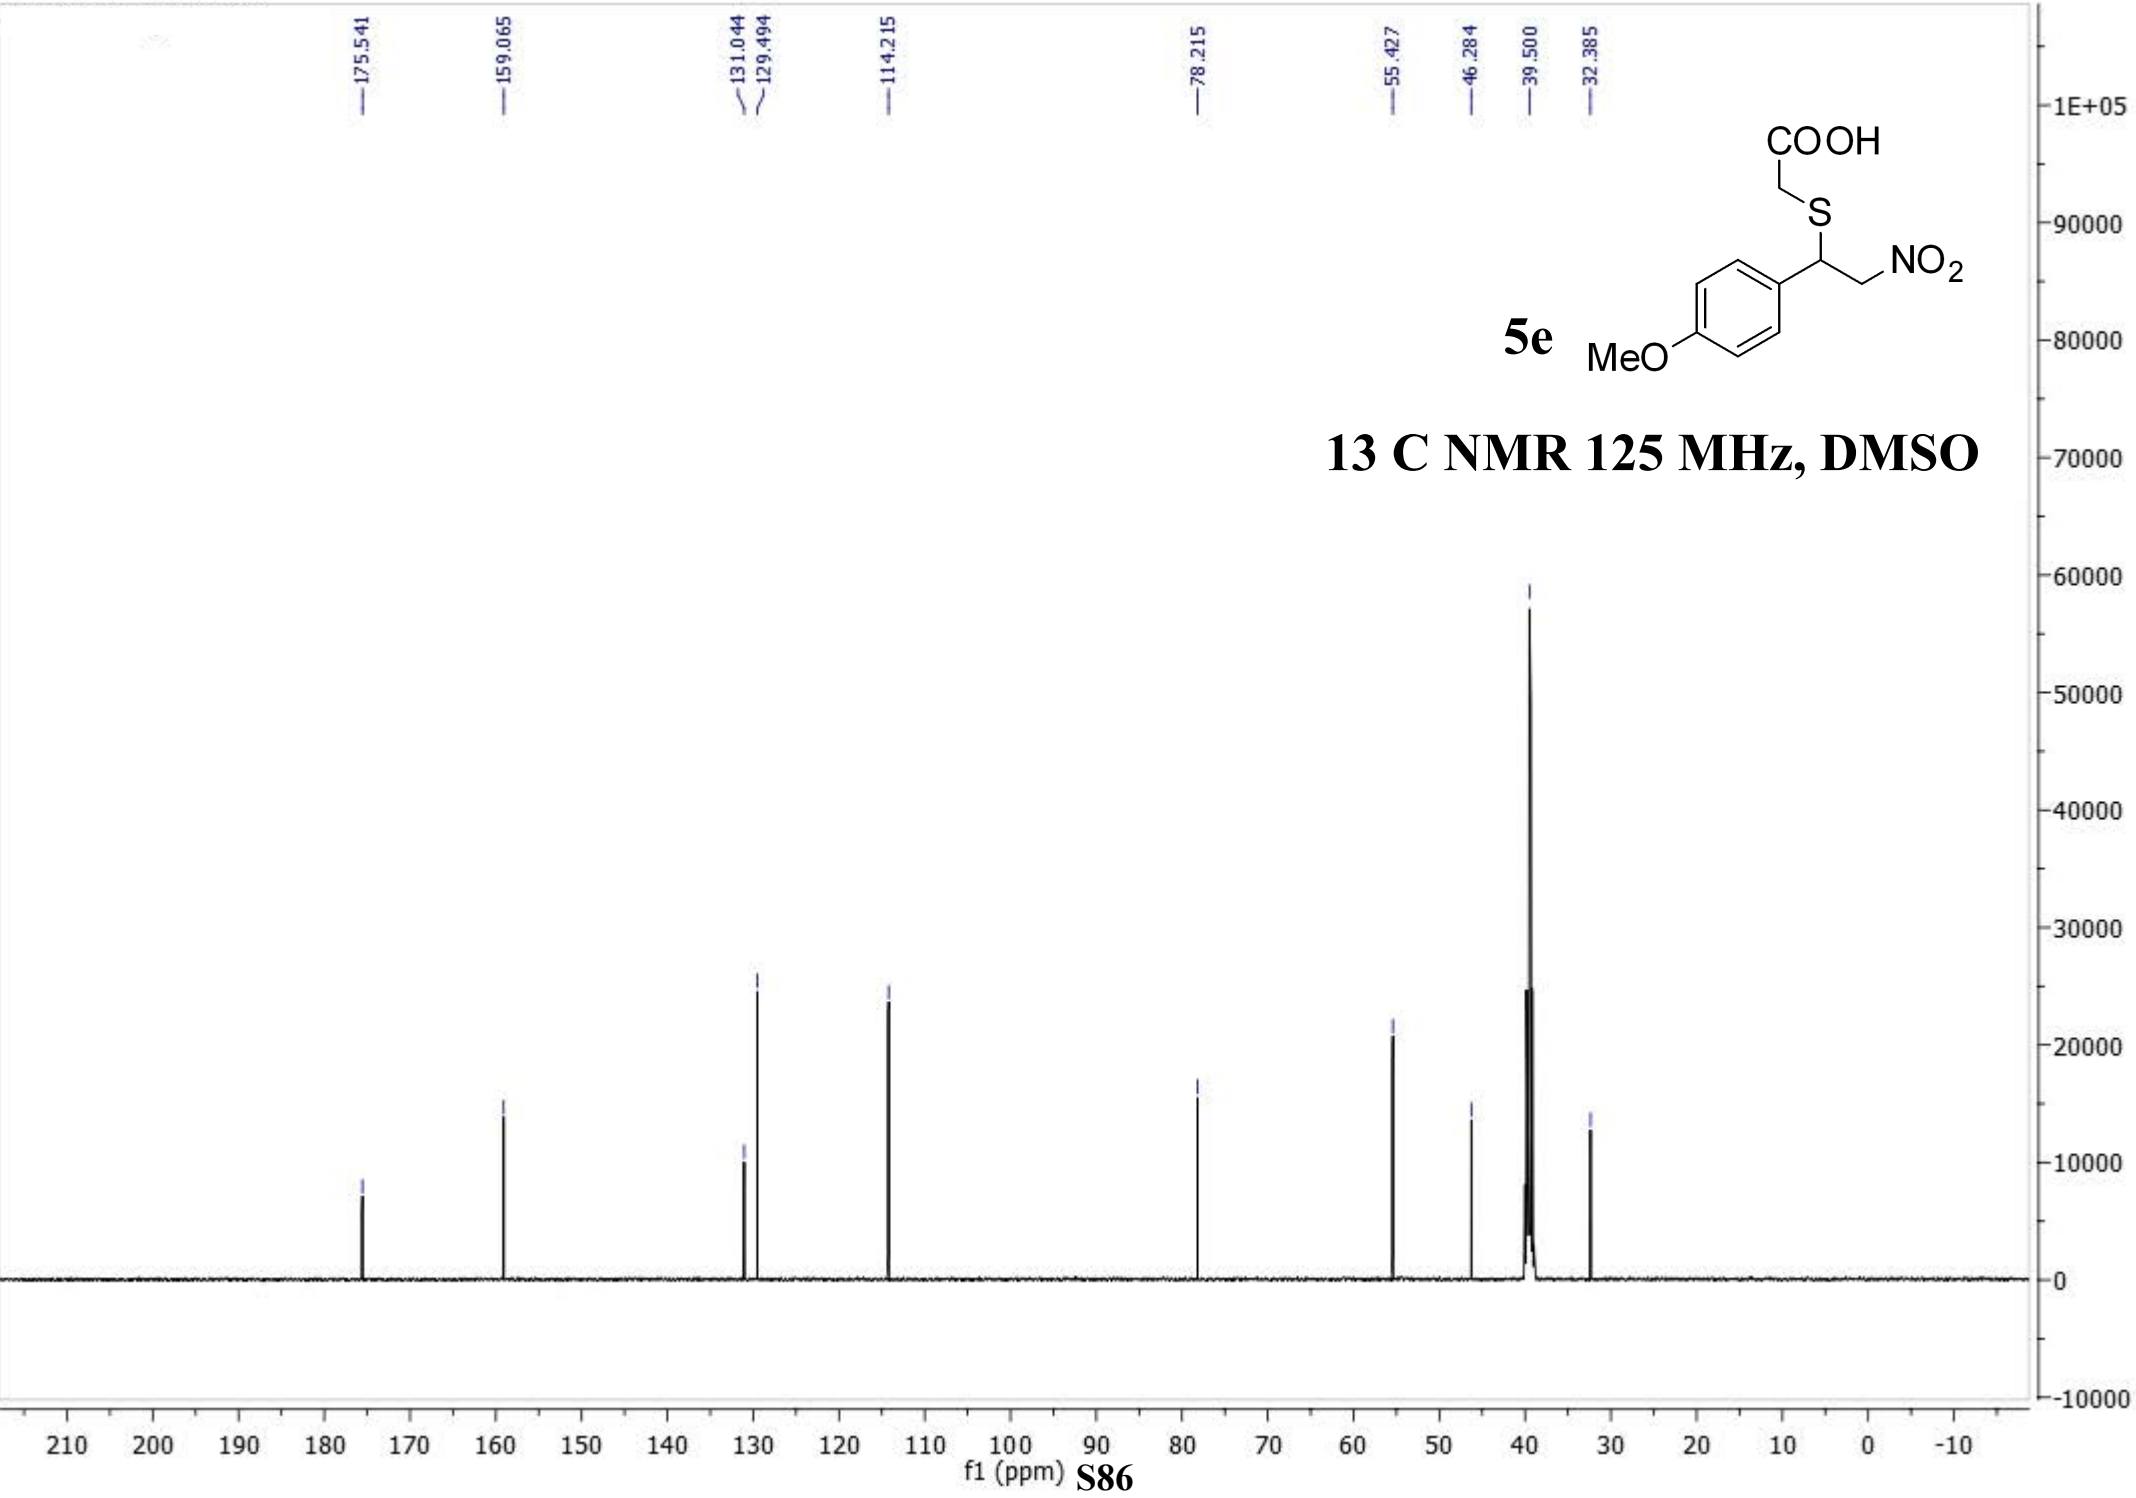

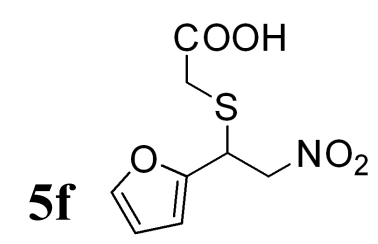

**13 C NMR 125 MHz, DMSO**

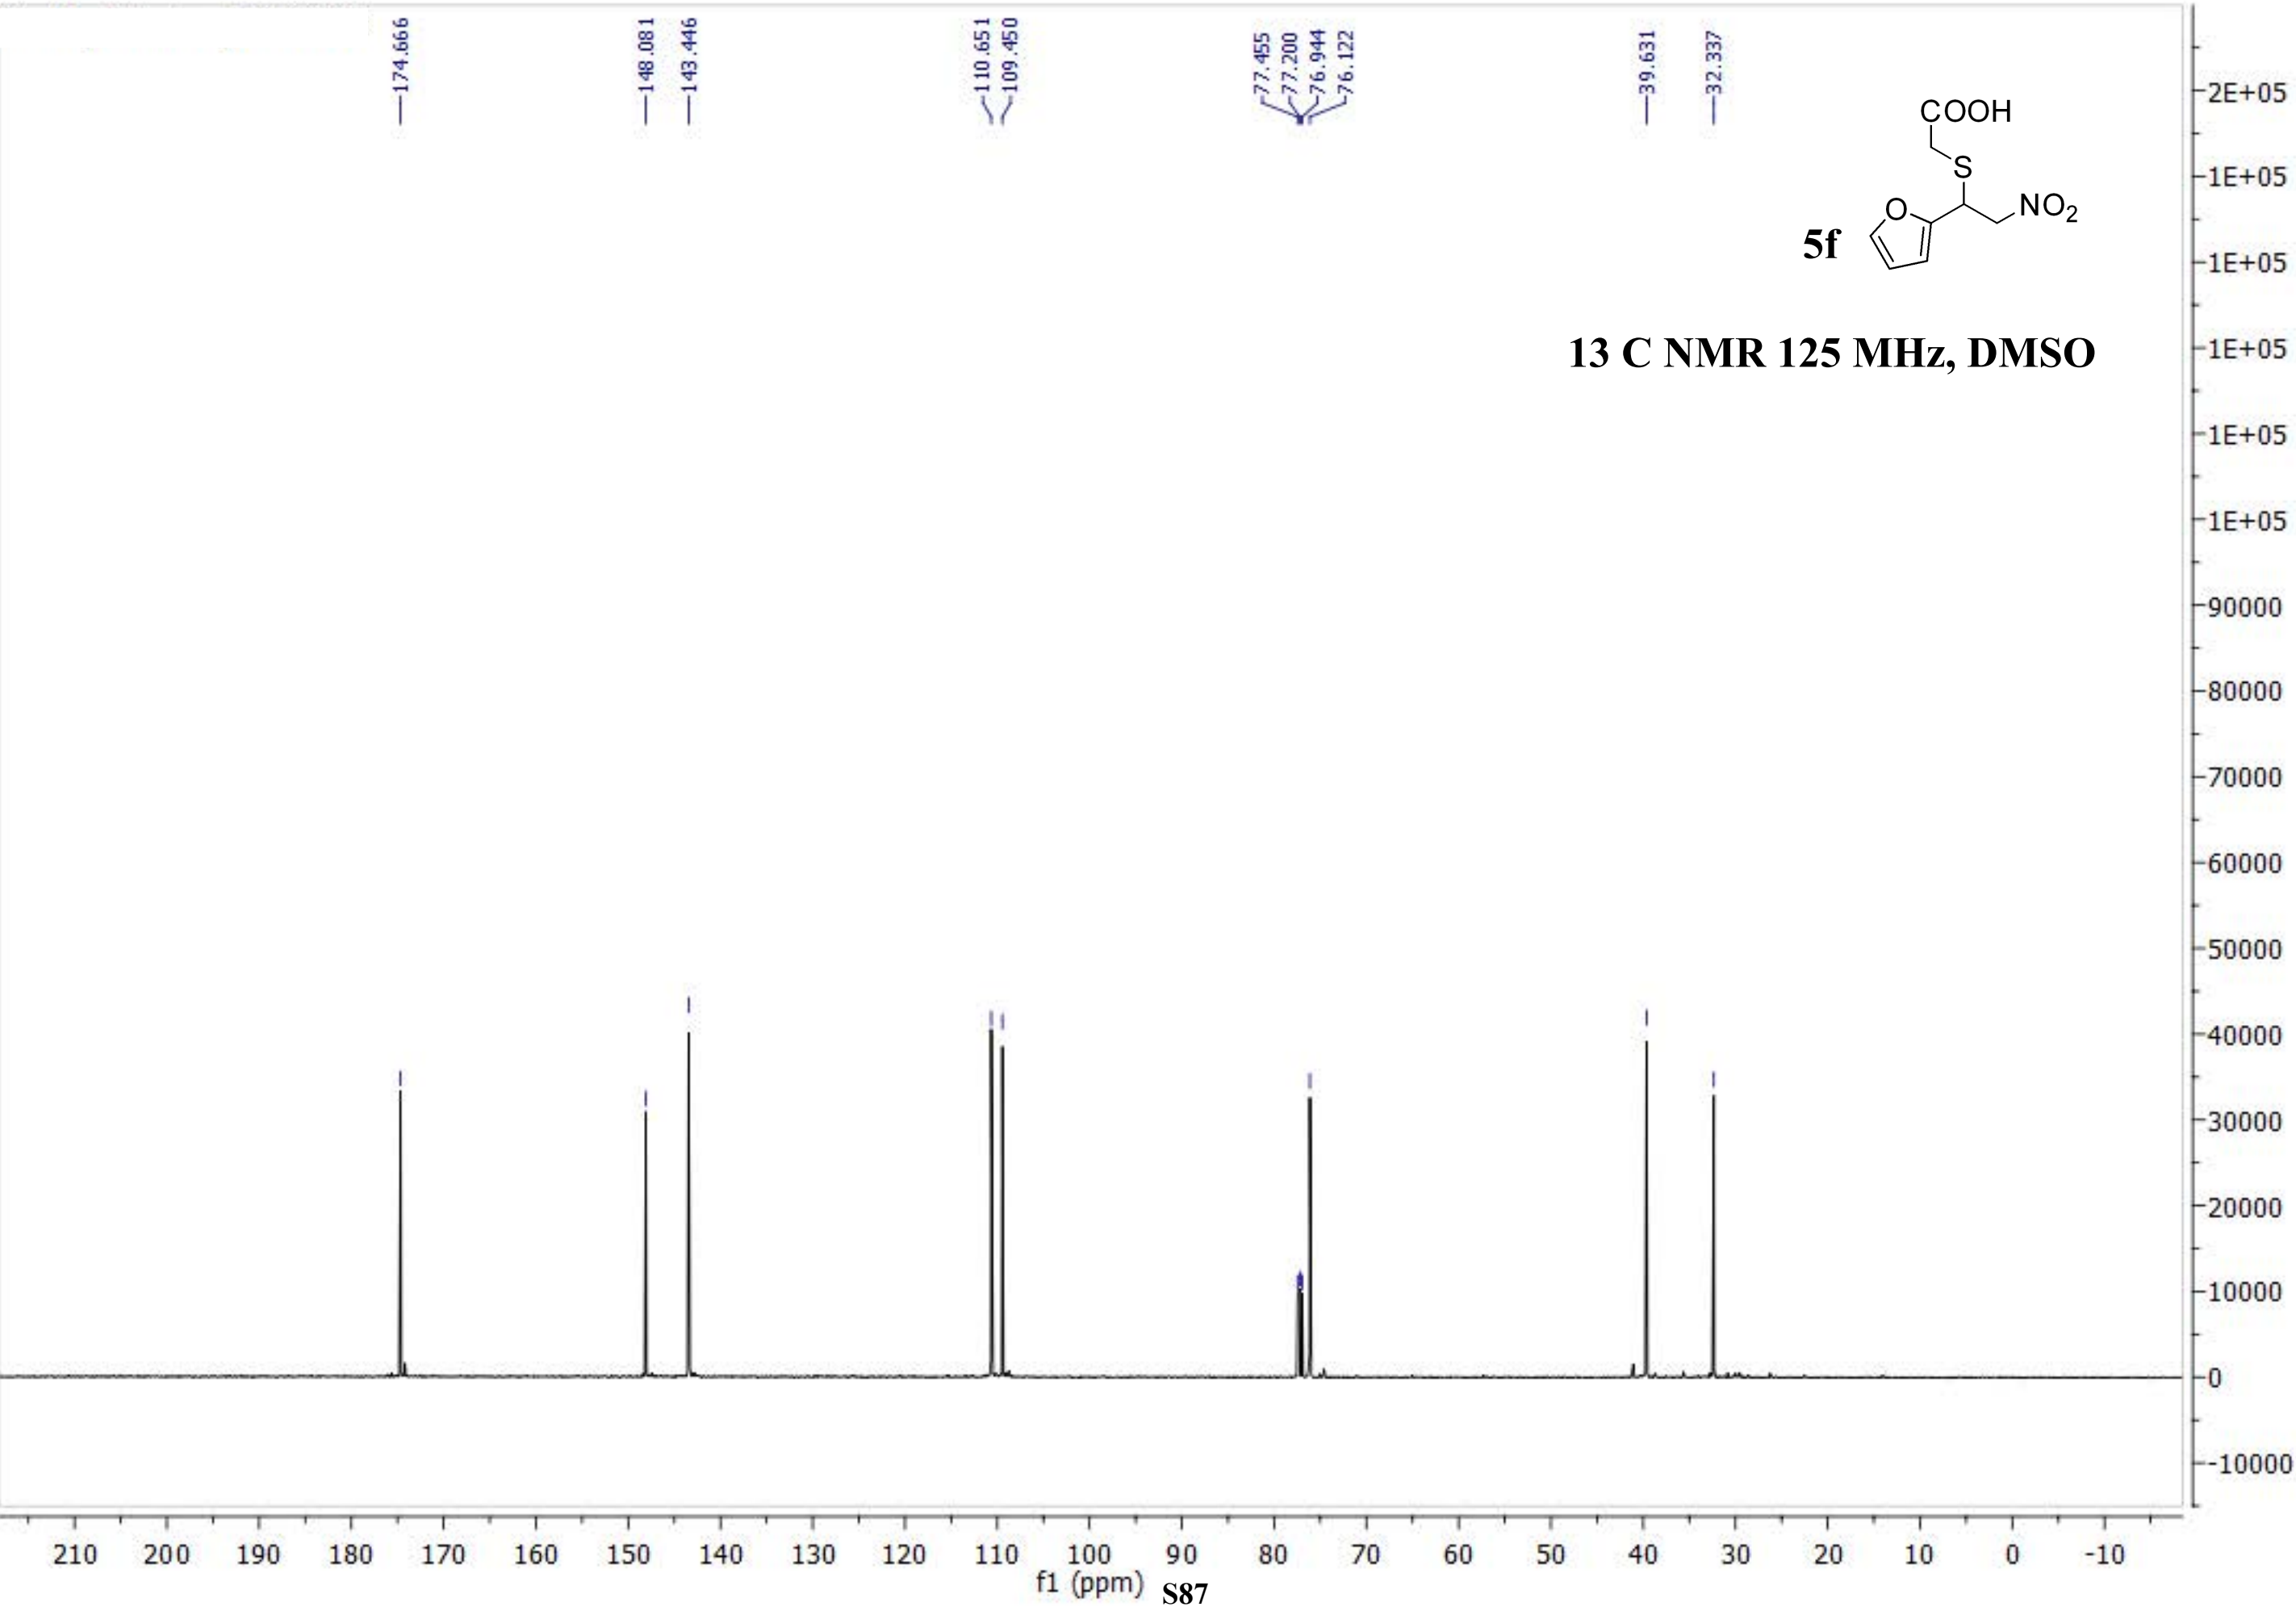

206.899  
176.970  
143.649  
129.061  
128.355  
127.203  
77.455  
77.200  
76.945  
49.583  
43.935  
35.599  
30.594

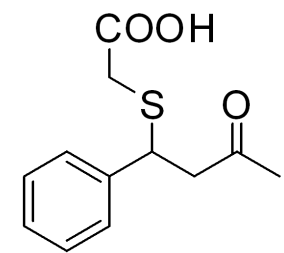

5g

13 C NMR 125 MHz, CDCl<sub>3</sub>

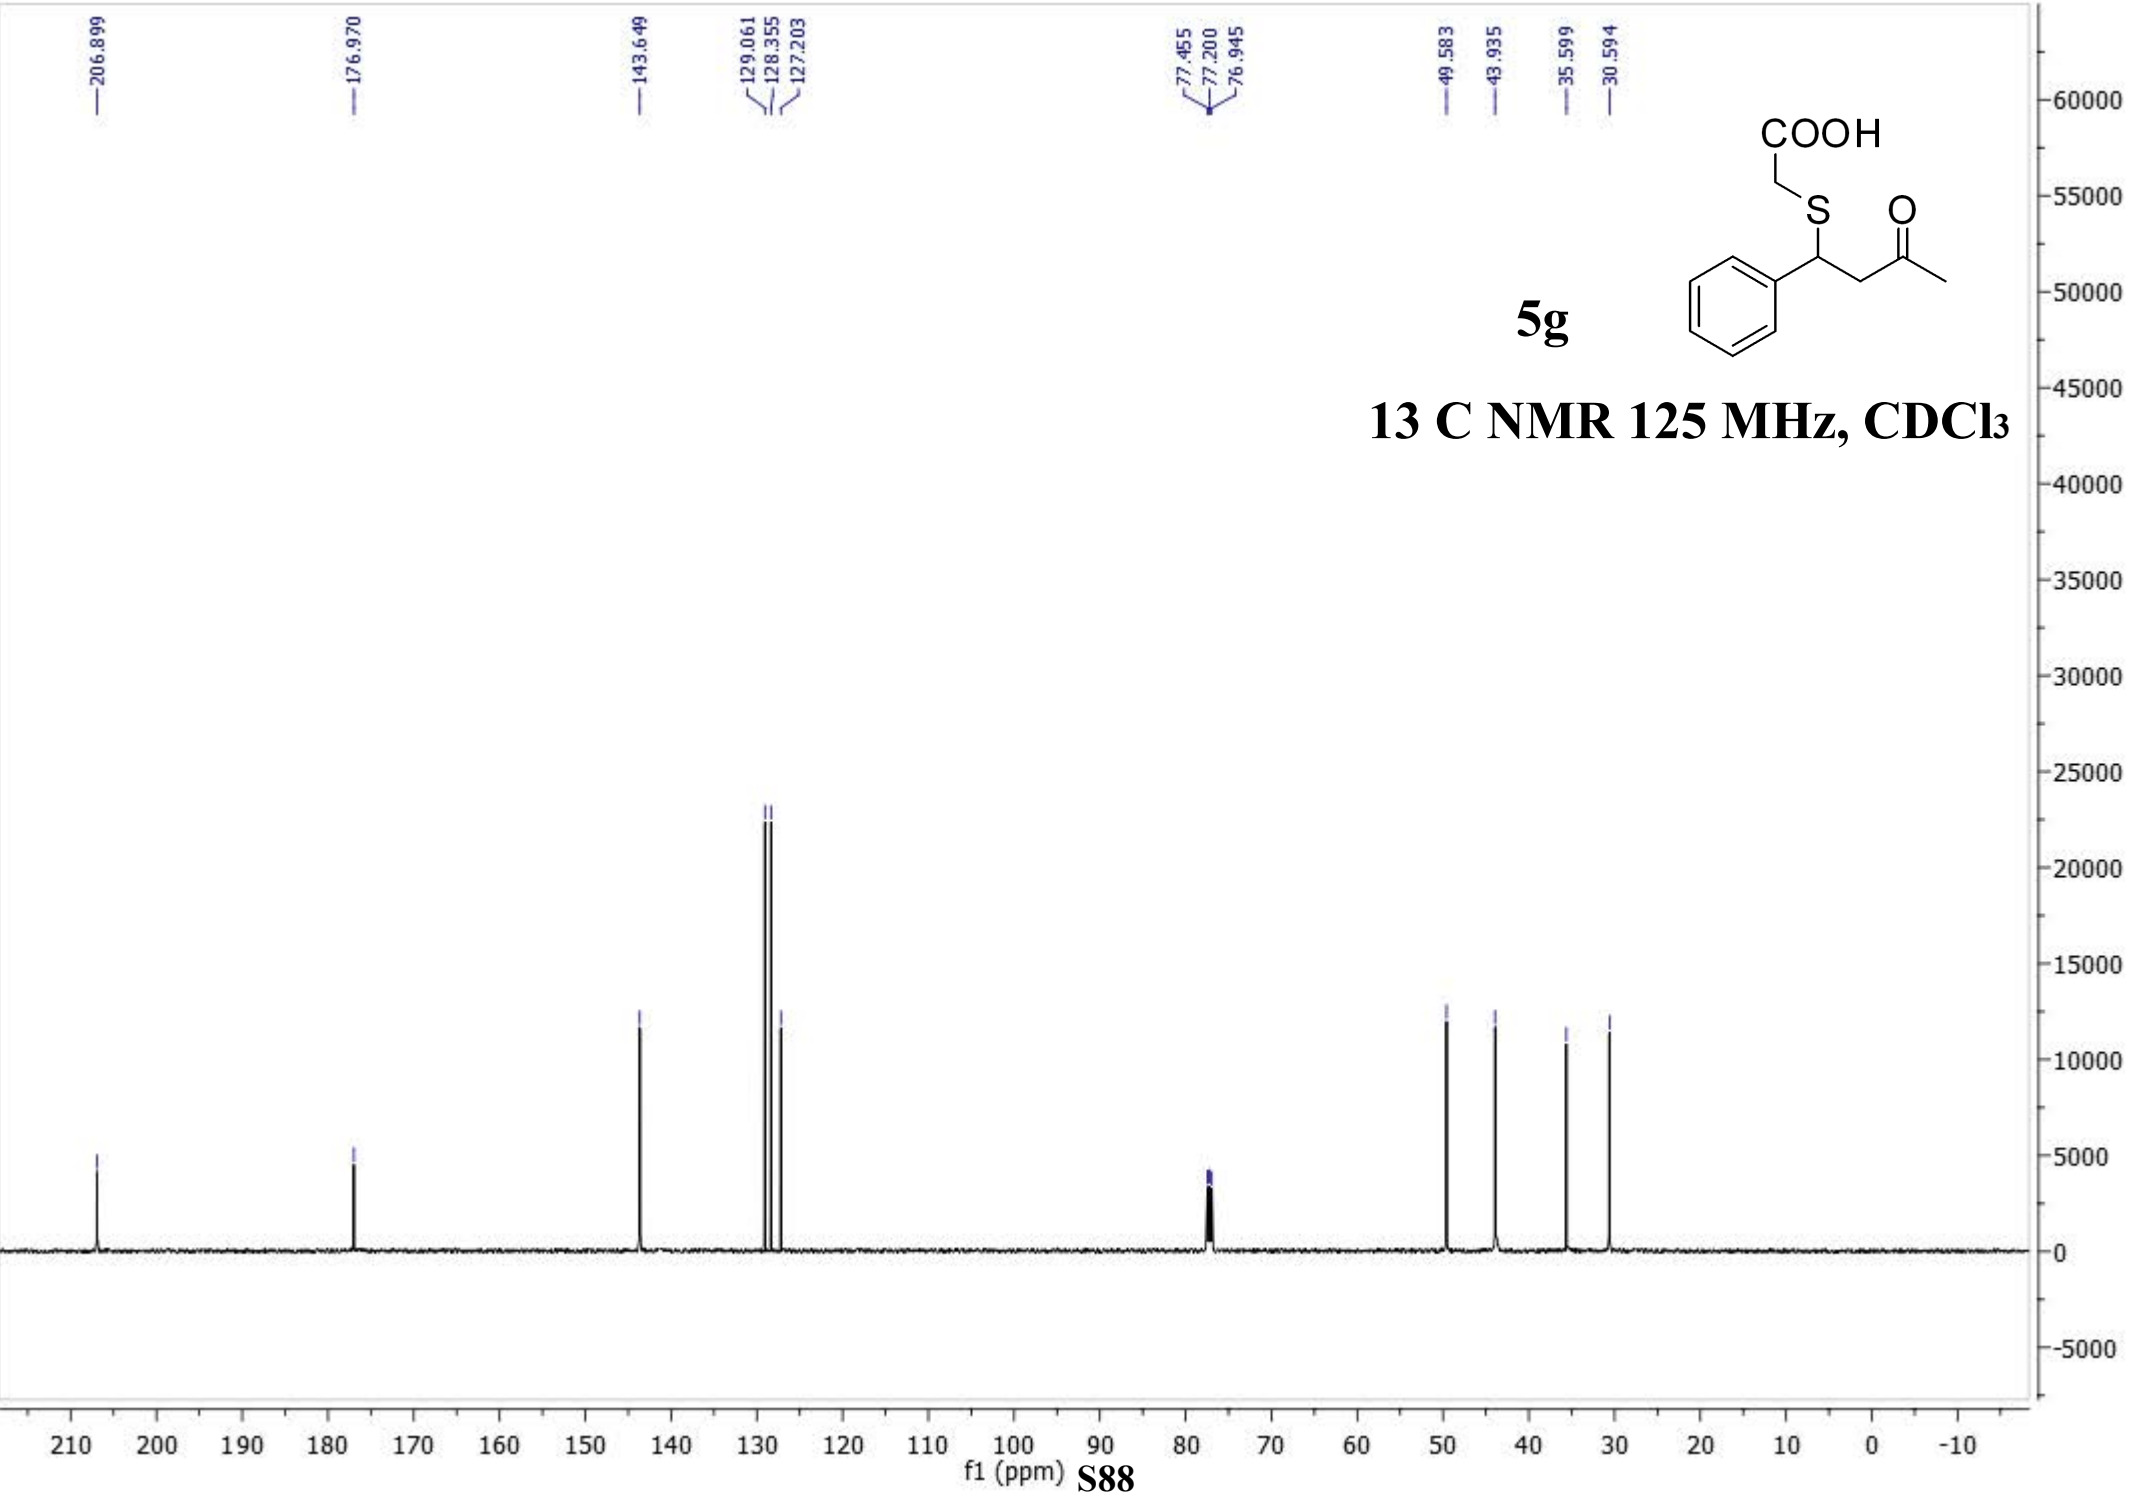

f1 (ppm) S88



**5h**  
**<sup>13</sup>C NMR 125 MHz, DMSO**

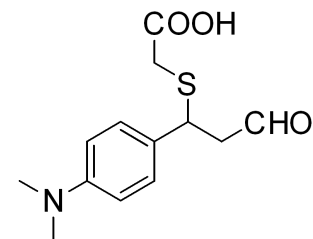

201.433  
175.043  
150.115  
129.523  
128.250  
113.636  
52.418  
46.519  
41.212  
39.500  
31.219

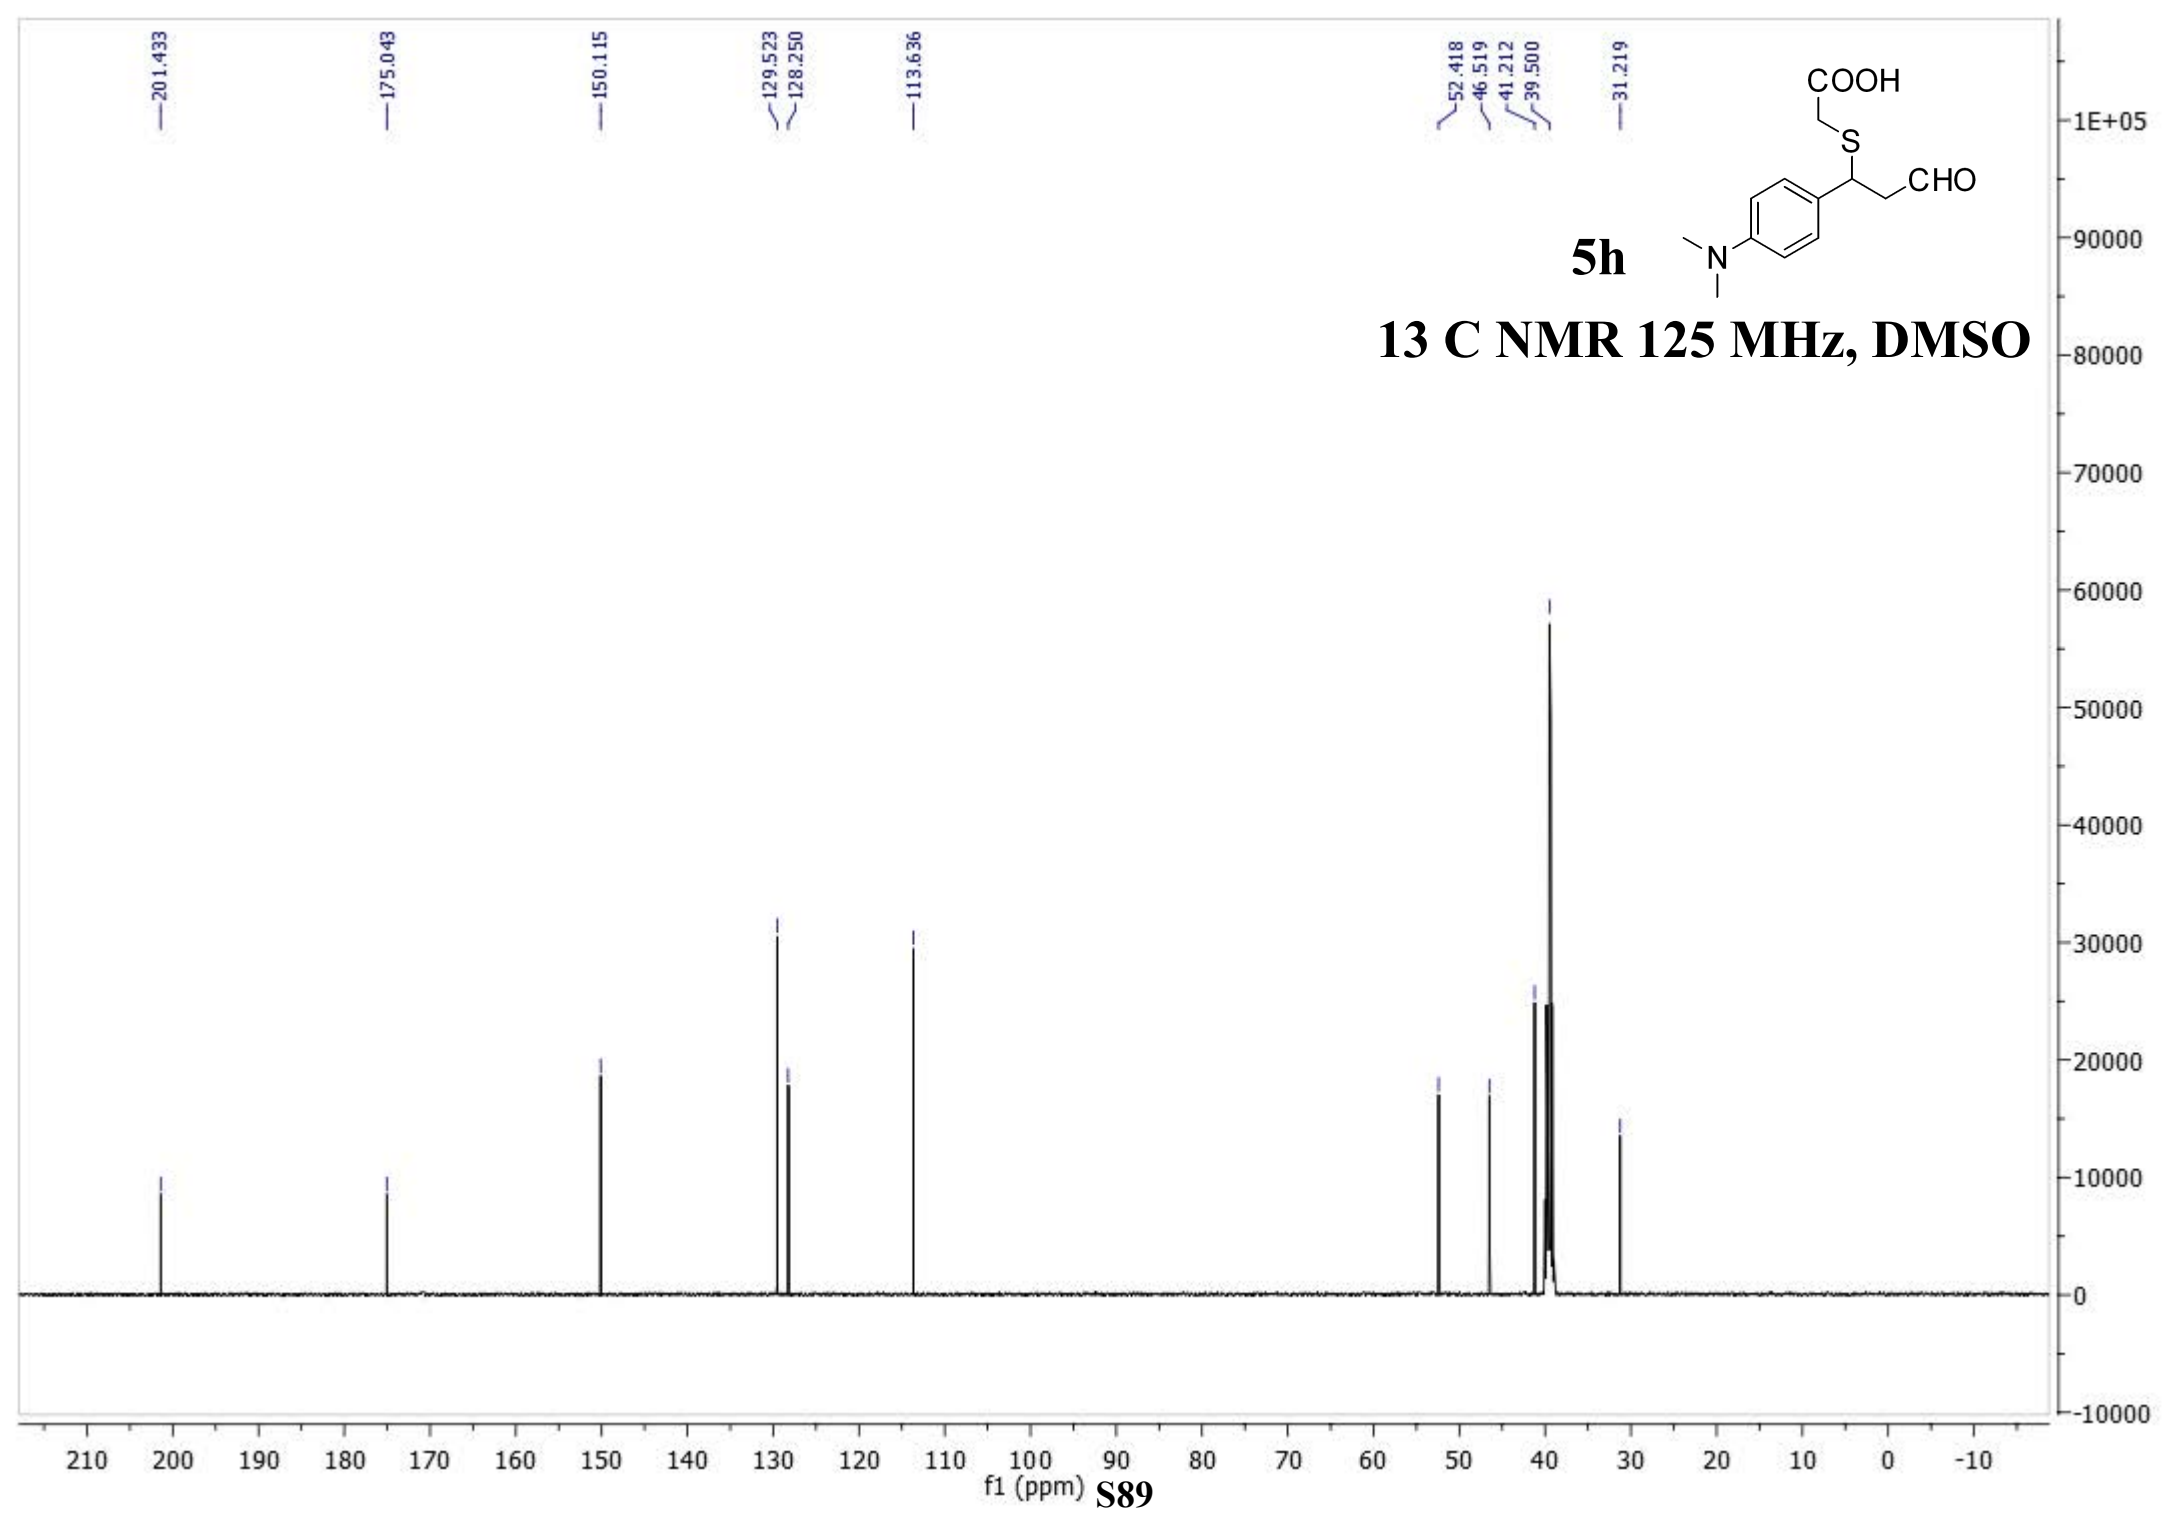

# 13 C NMR 125 MHz, DMSO

**5i**

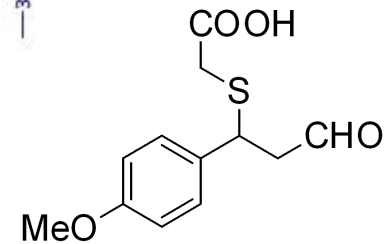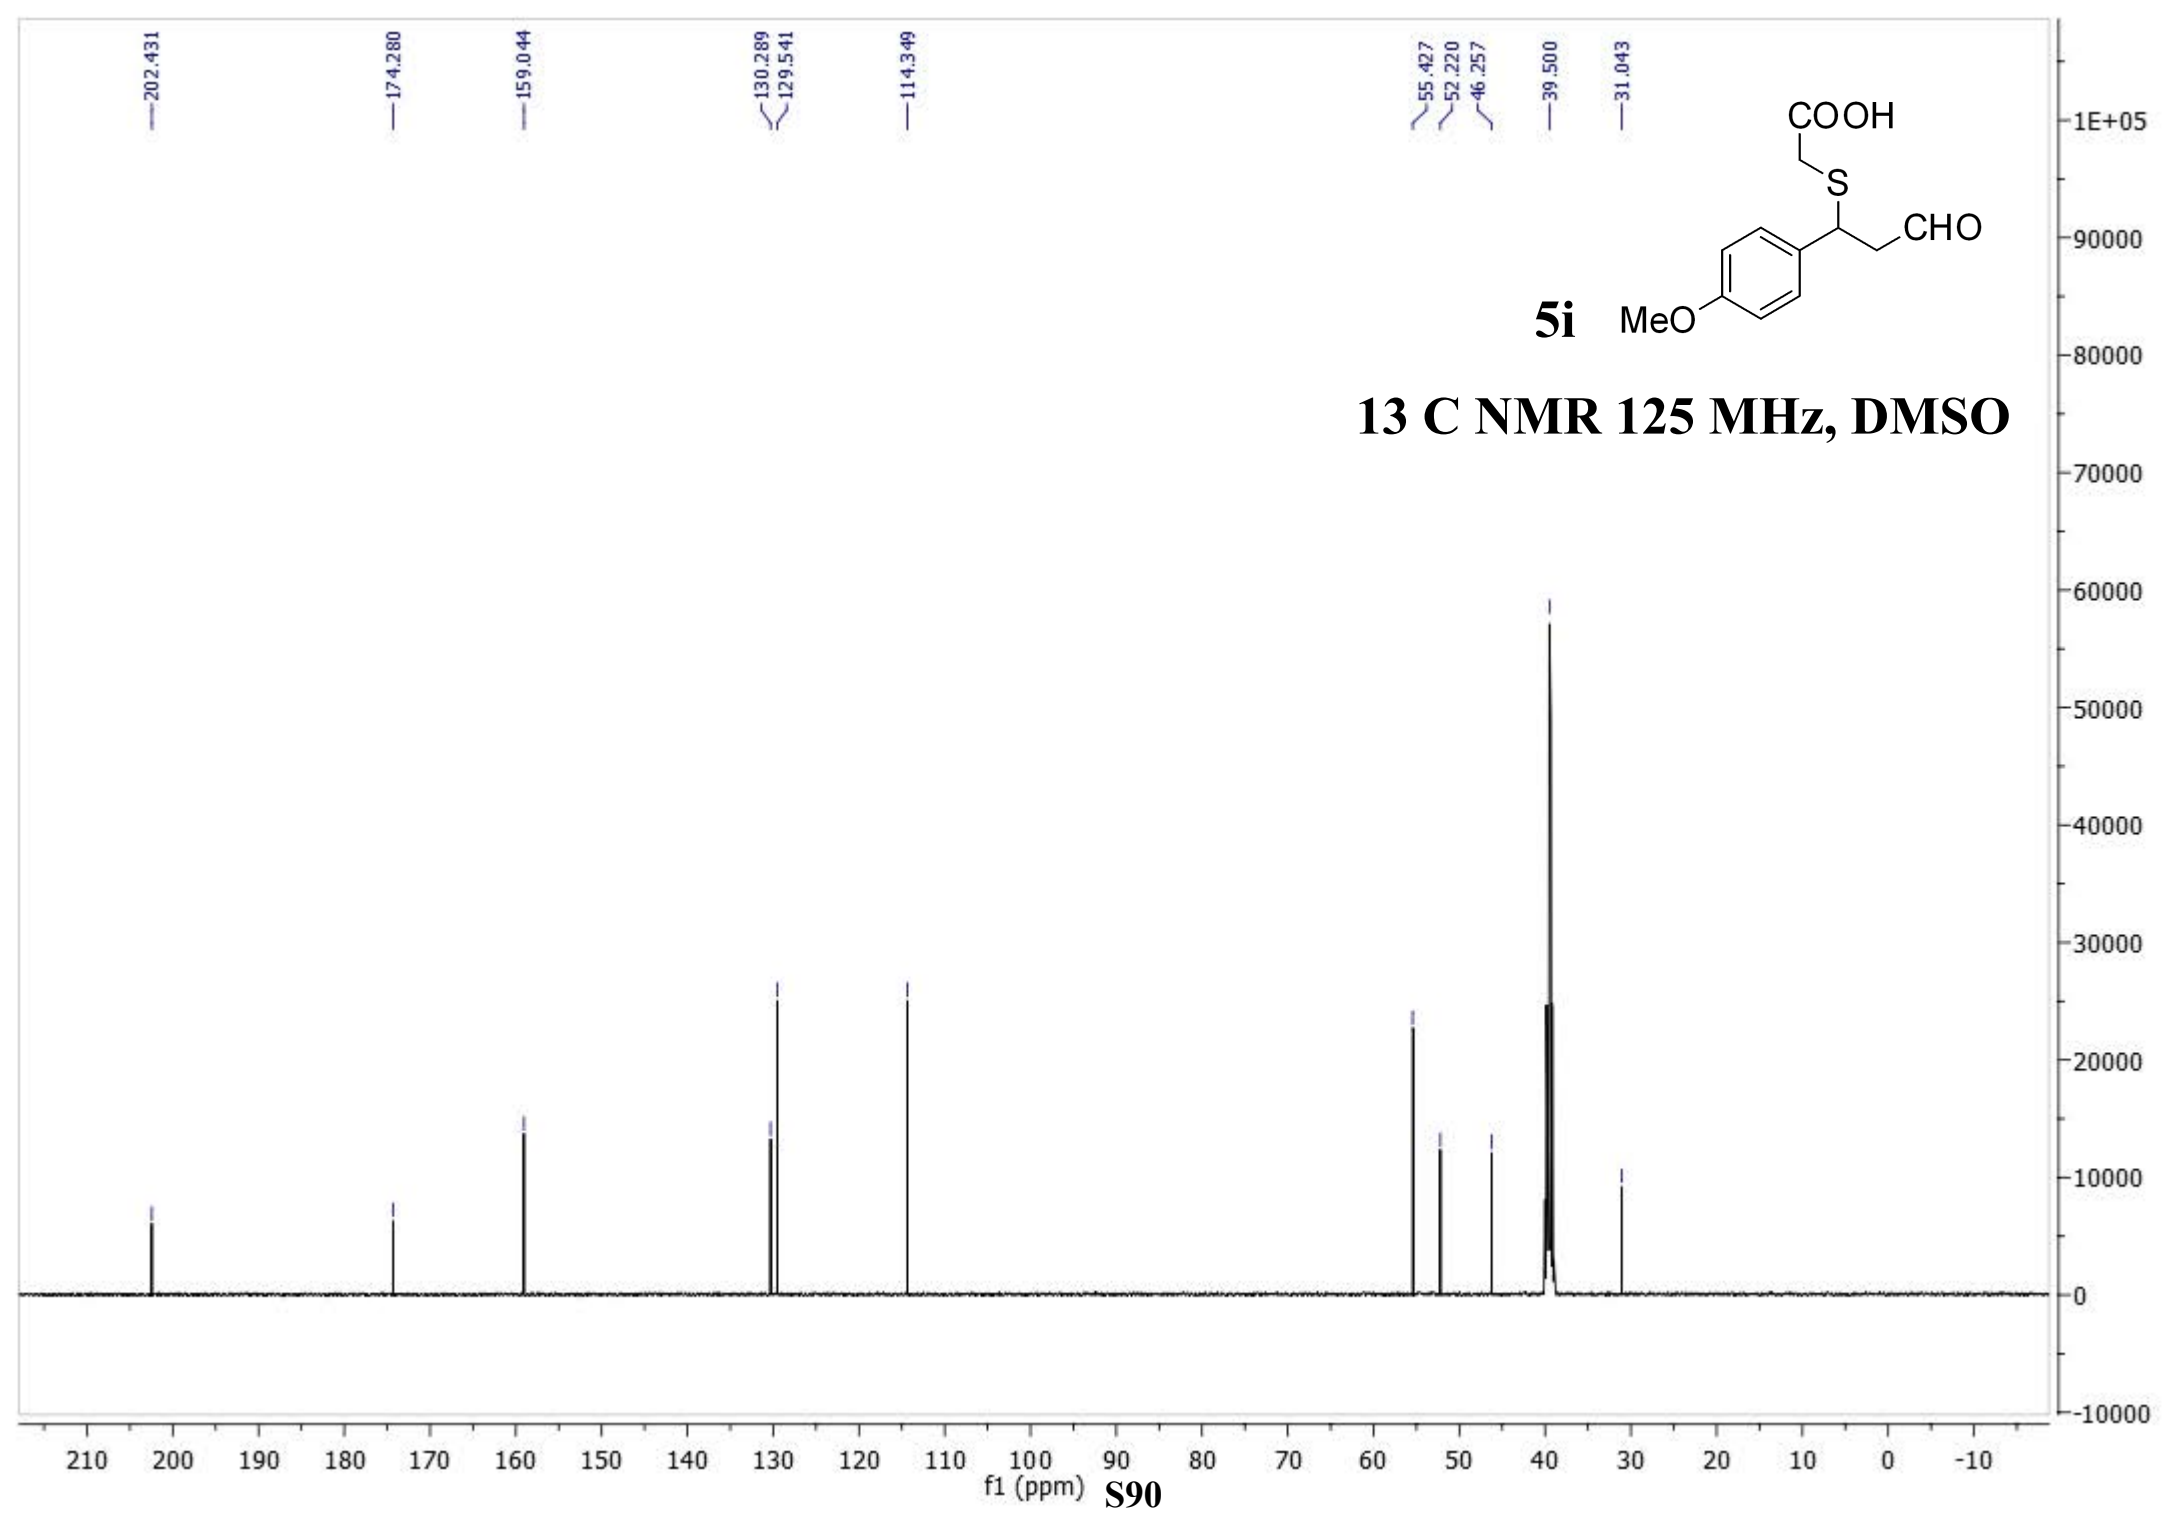

**5j**

CCOC(=O)CC(SCC(=O)O)c1ccccc1

**<sup>13</sup>C NMR 125 MHz, DMSO**

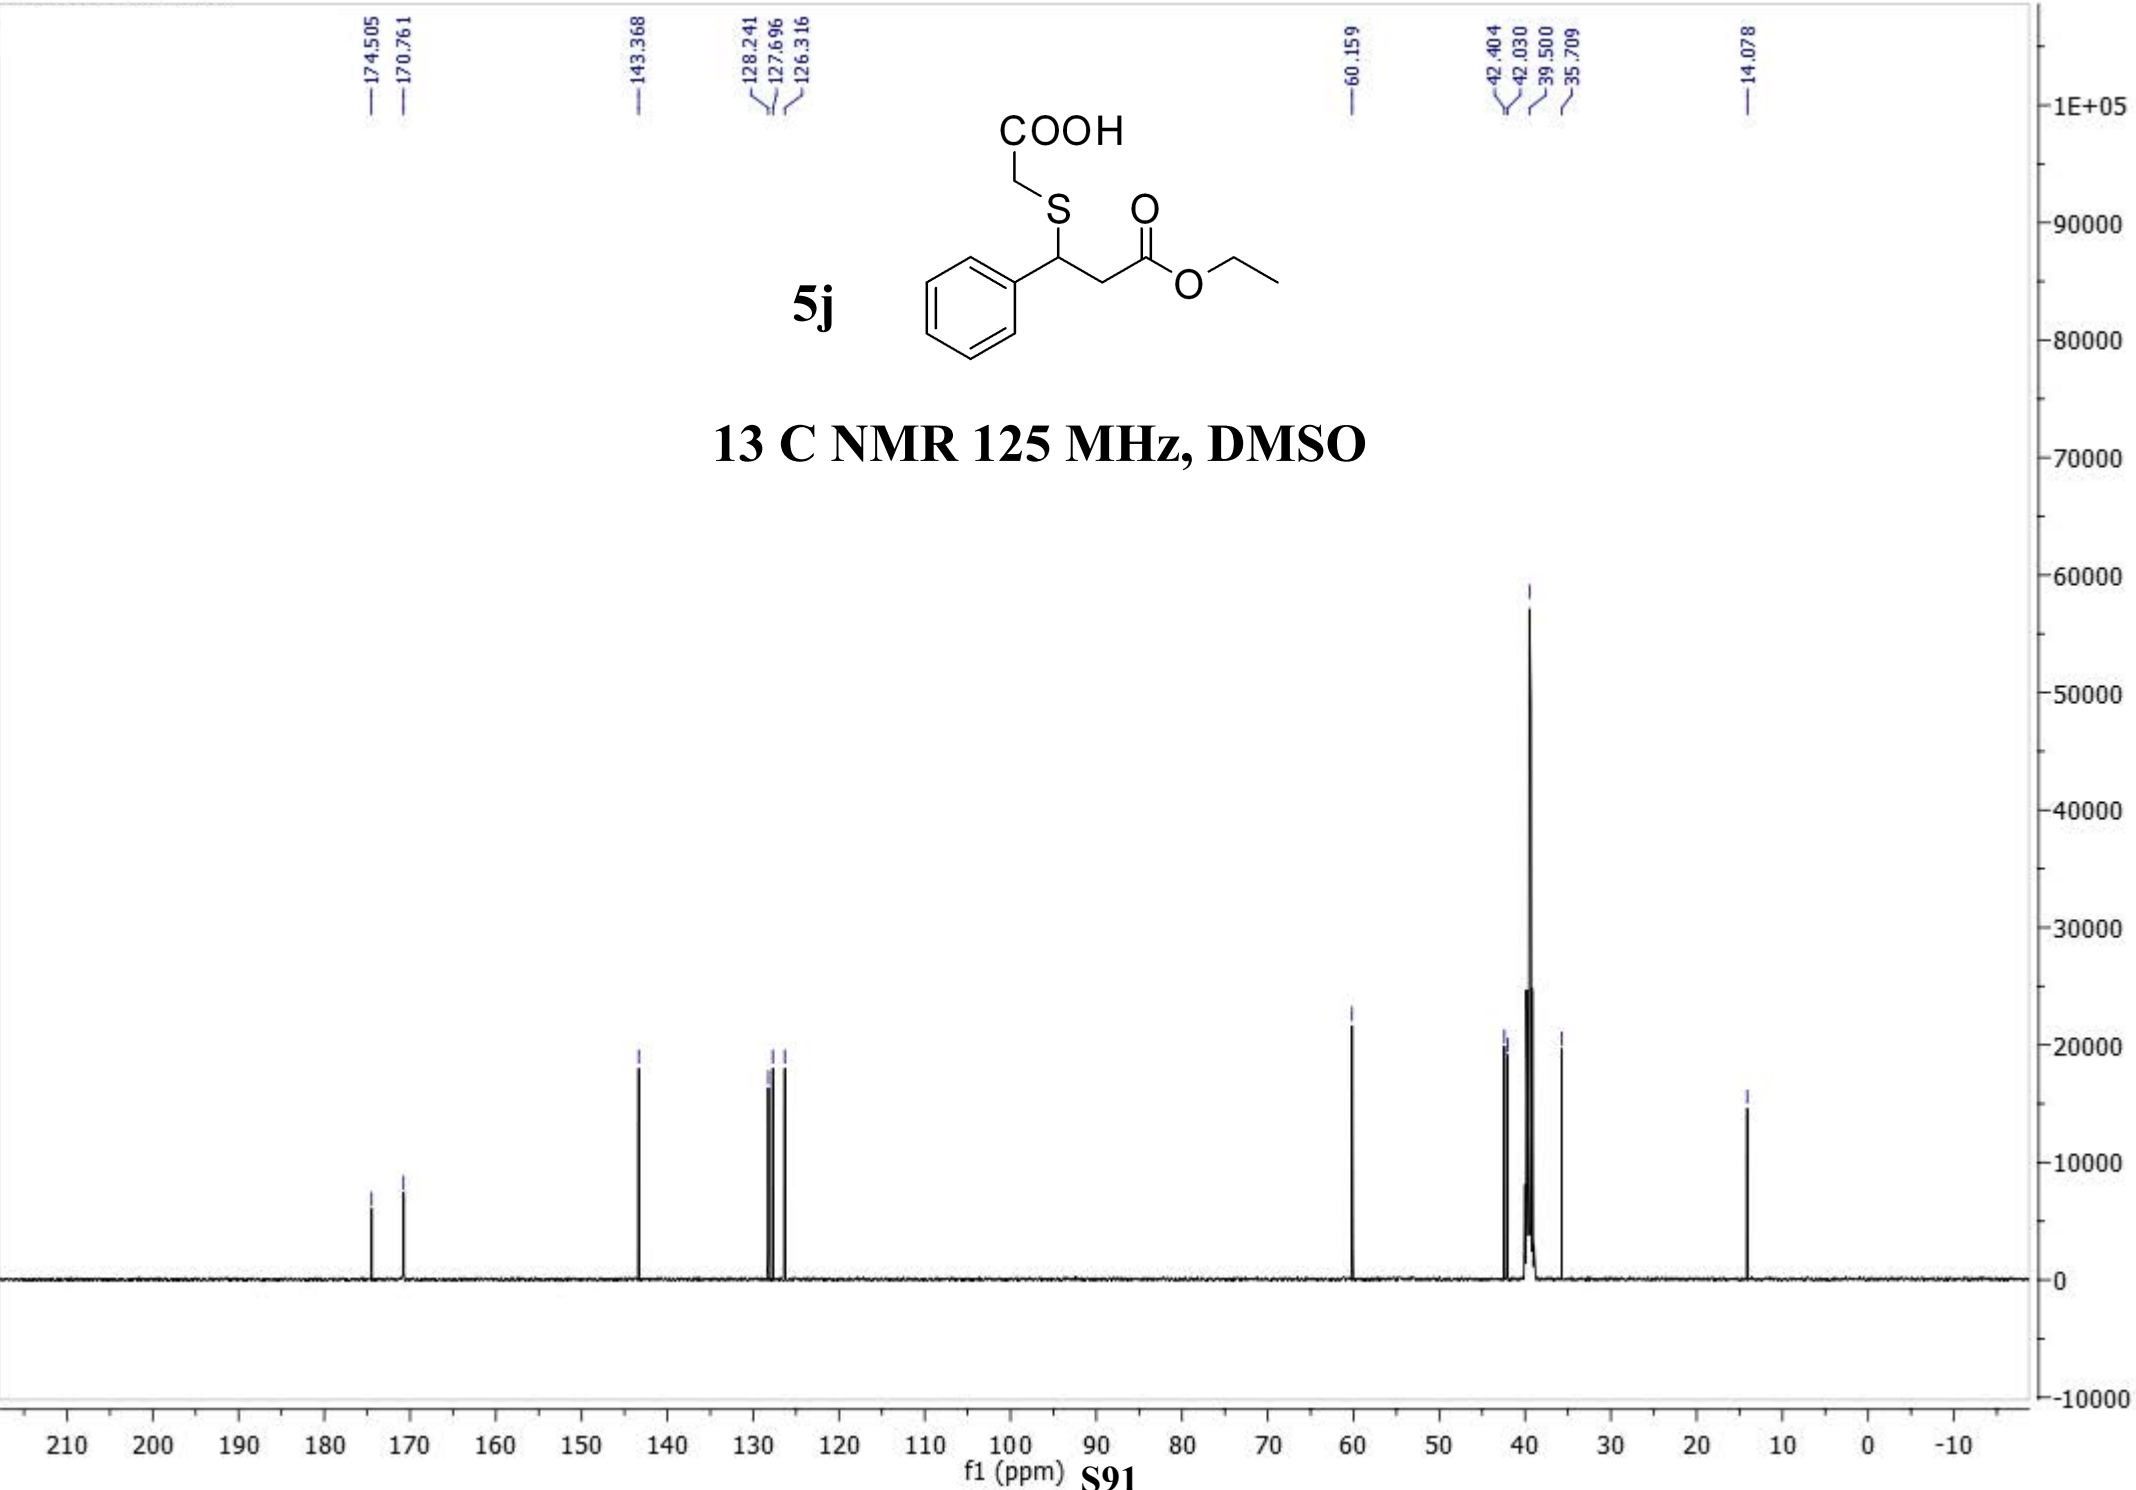

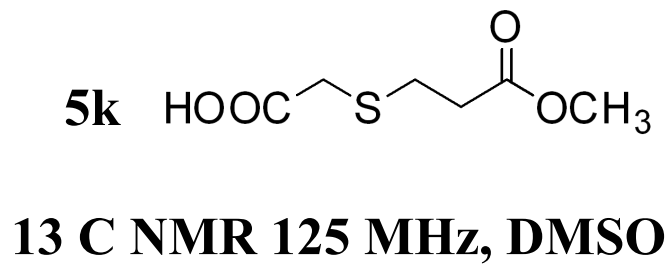

173.309  
171.353

51.749

43.570

39.500

34.270

28.040

1E+05

90000

80000

70000

60000

50000

40000

30000

20000

10000

0

210 200 190 180 170 160 150 140 130 120 110 100 90 80 70 60 50 40 30 20 10 0 -10

f1 (ppm) S92

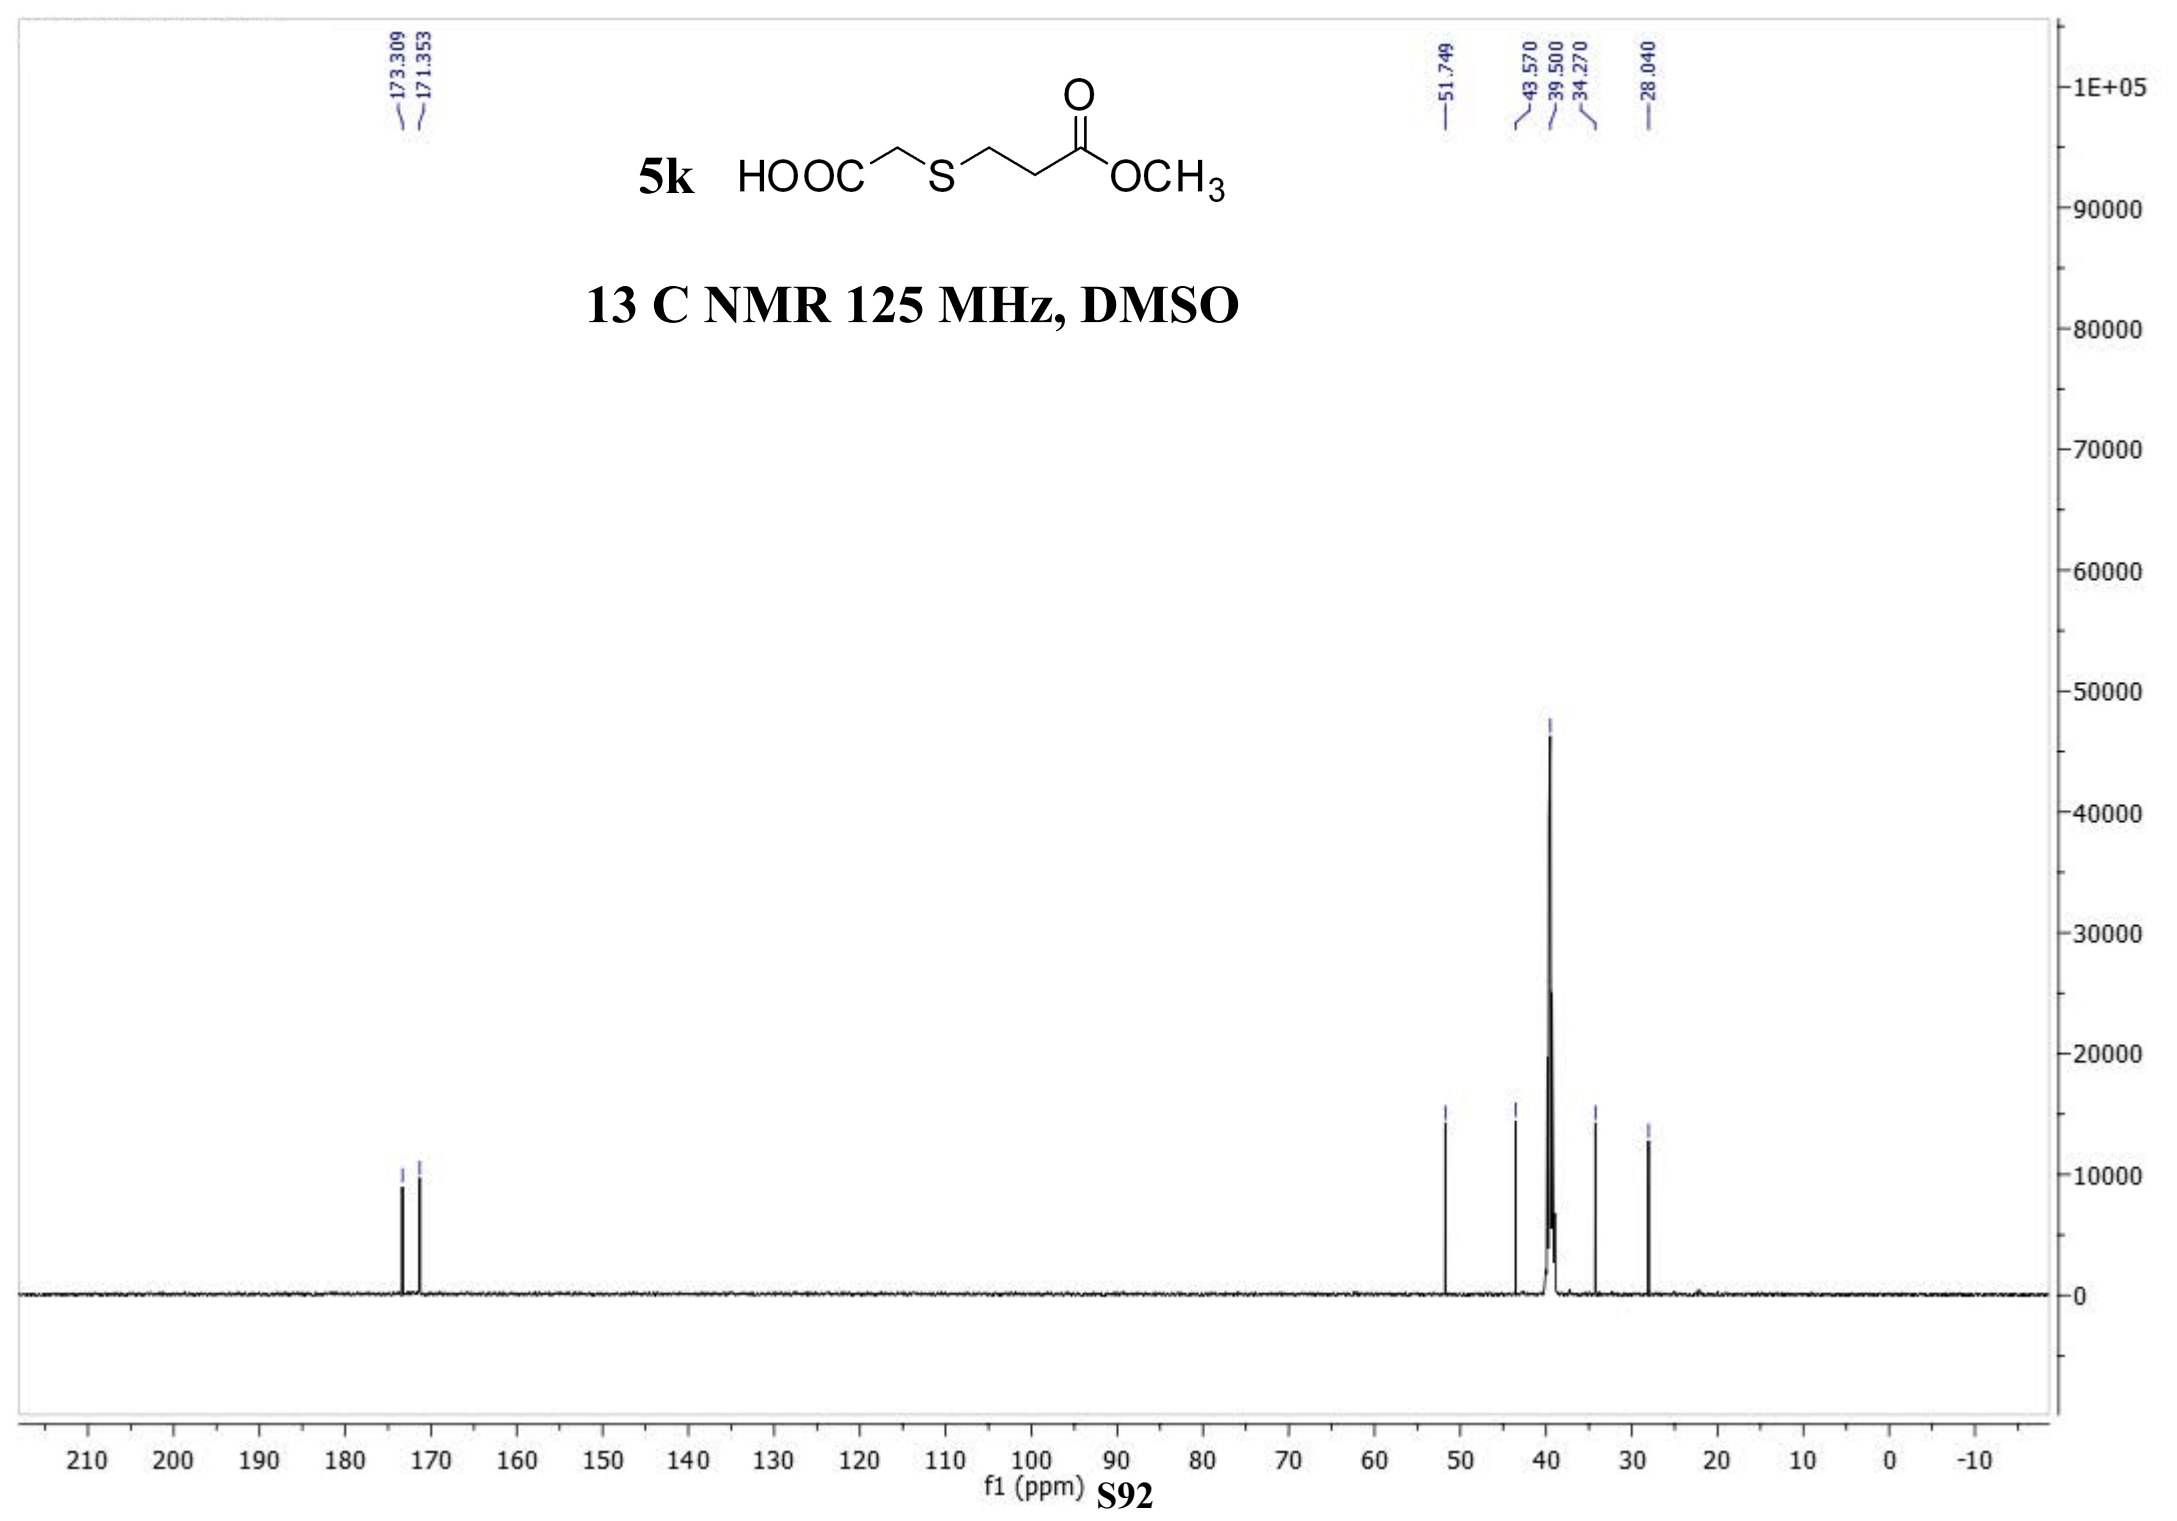

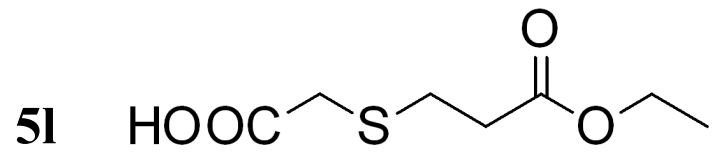

**$^{13}\text{C}$  NMR 125 MHz, DMSO**

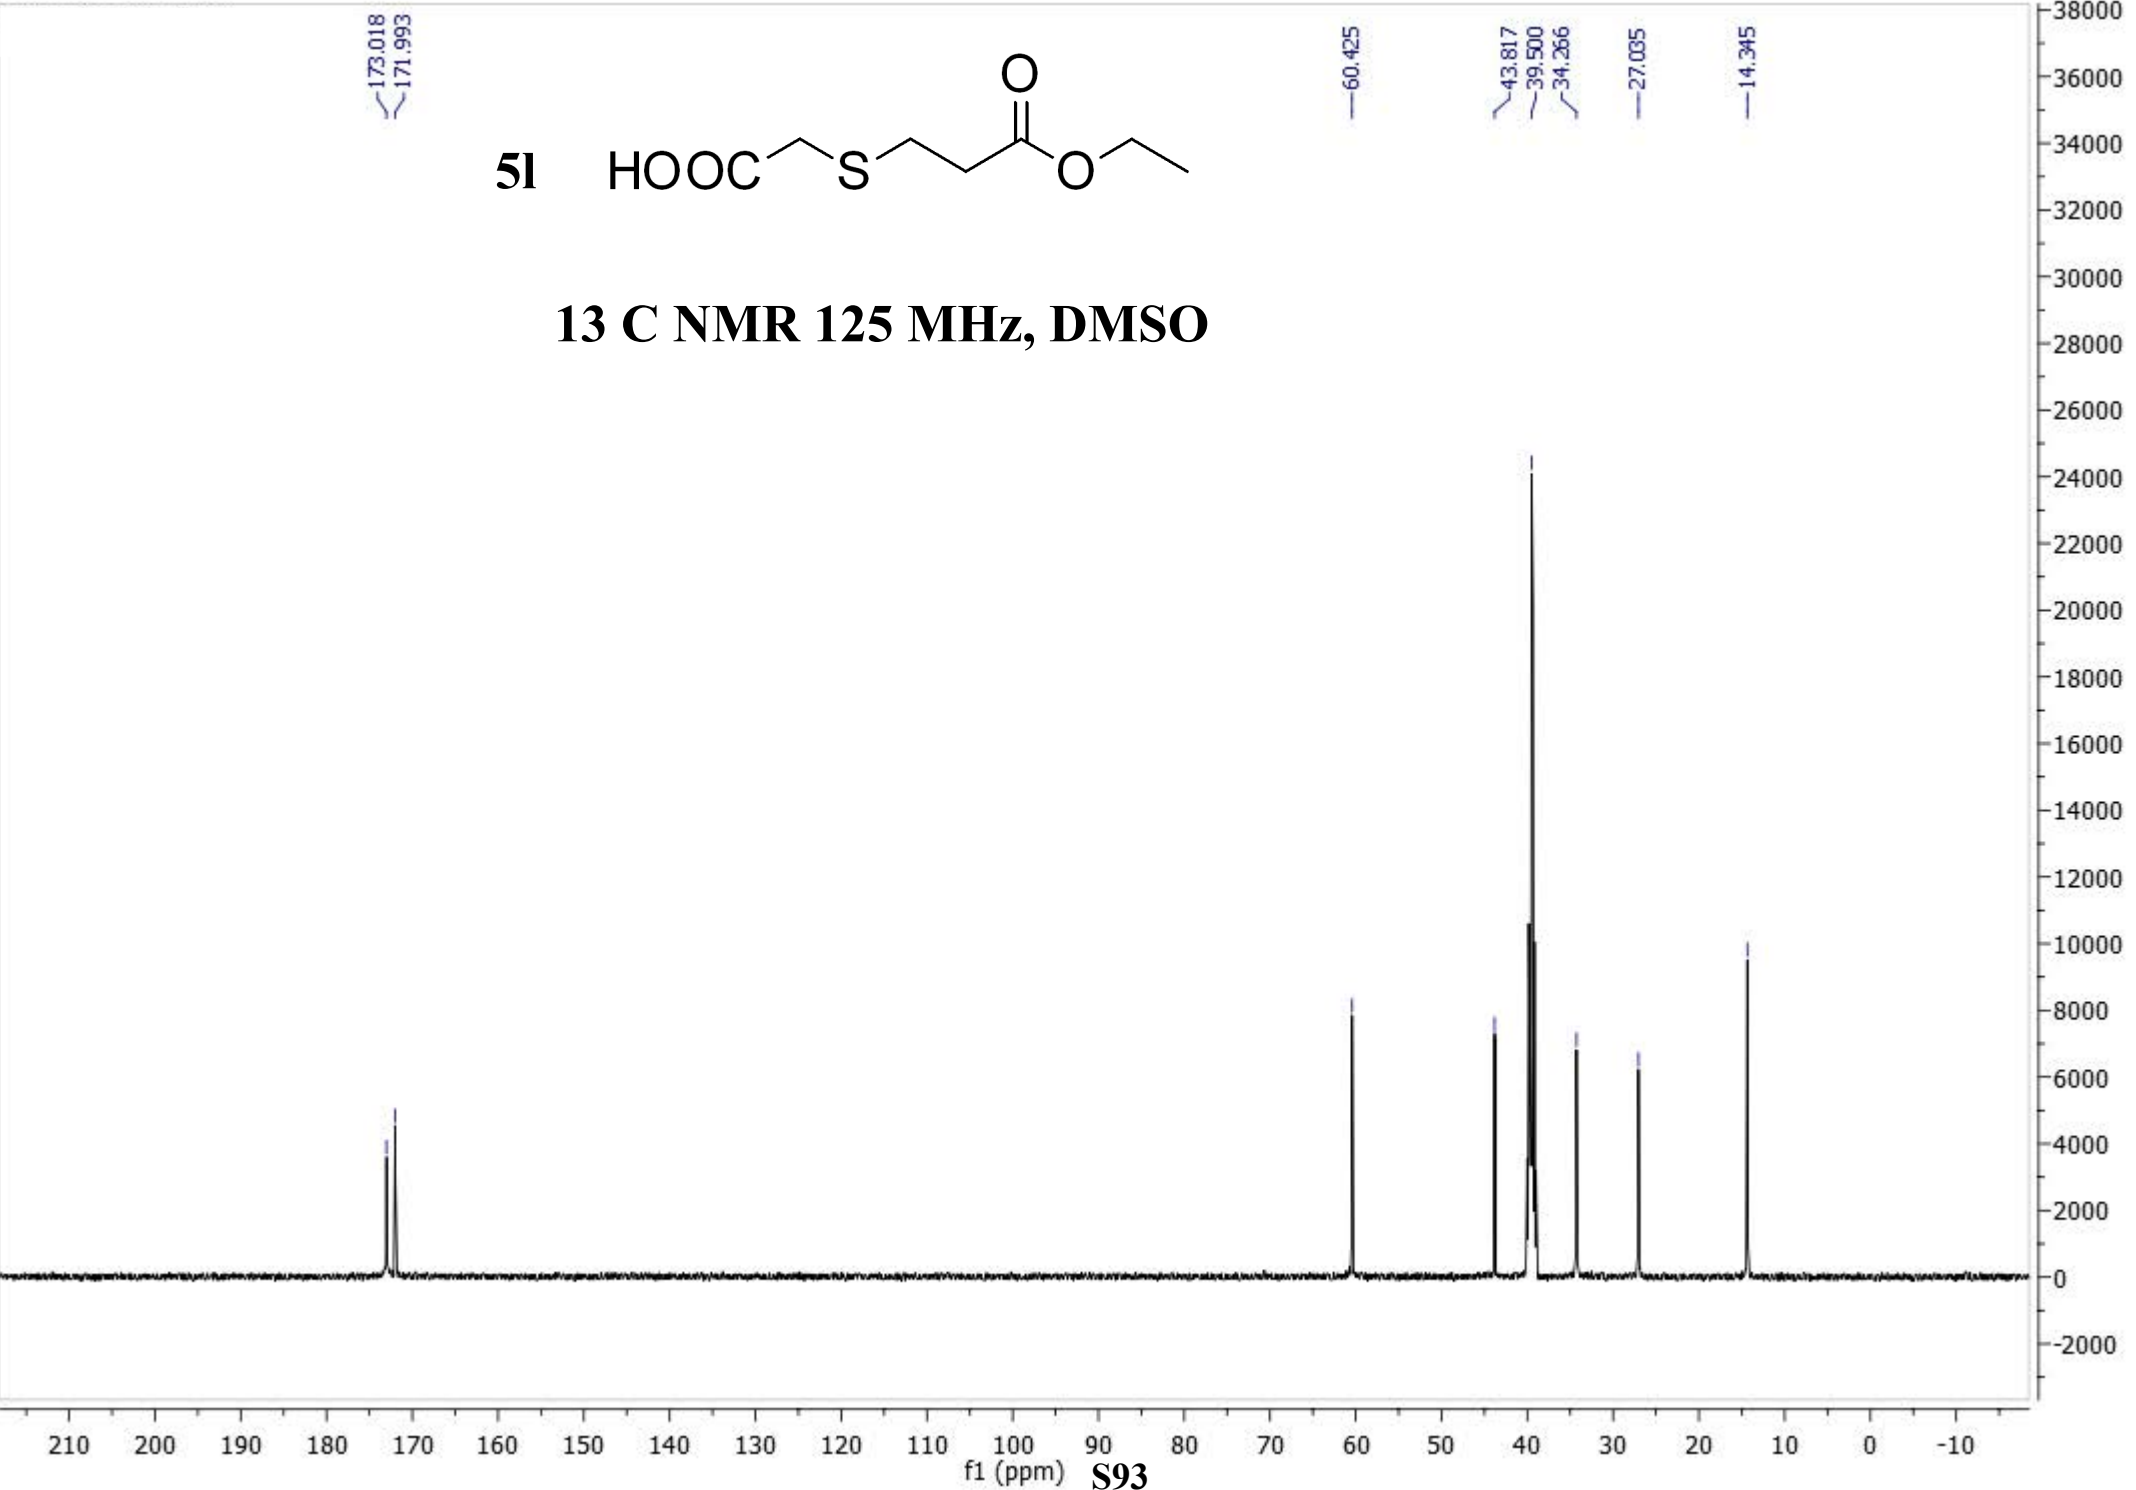

5m

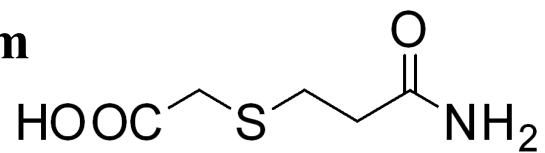

**<sup>13</sup>C NMR 125 MHz, DMSO**

174.235  
167.521

44.709  
39.500  
35.469  
27.878

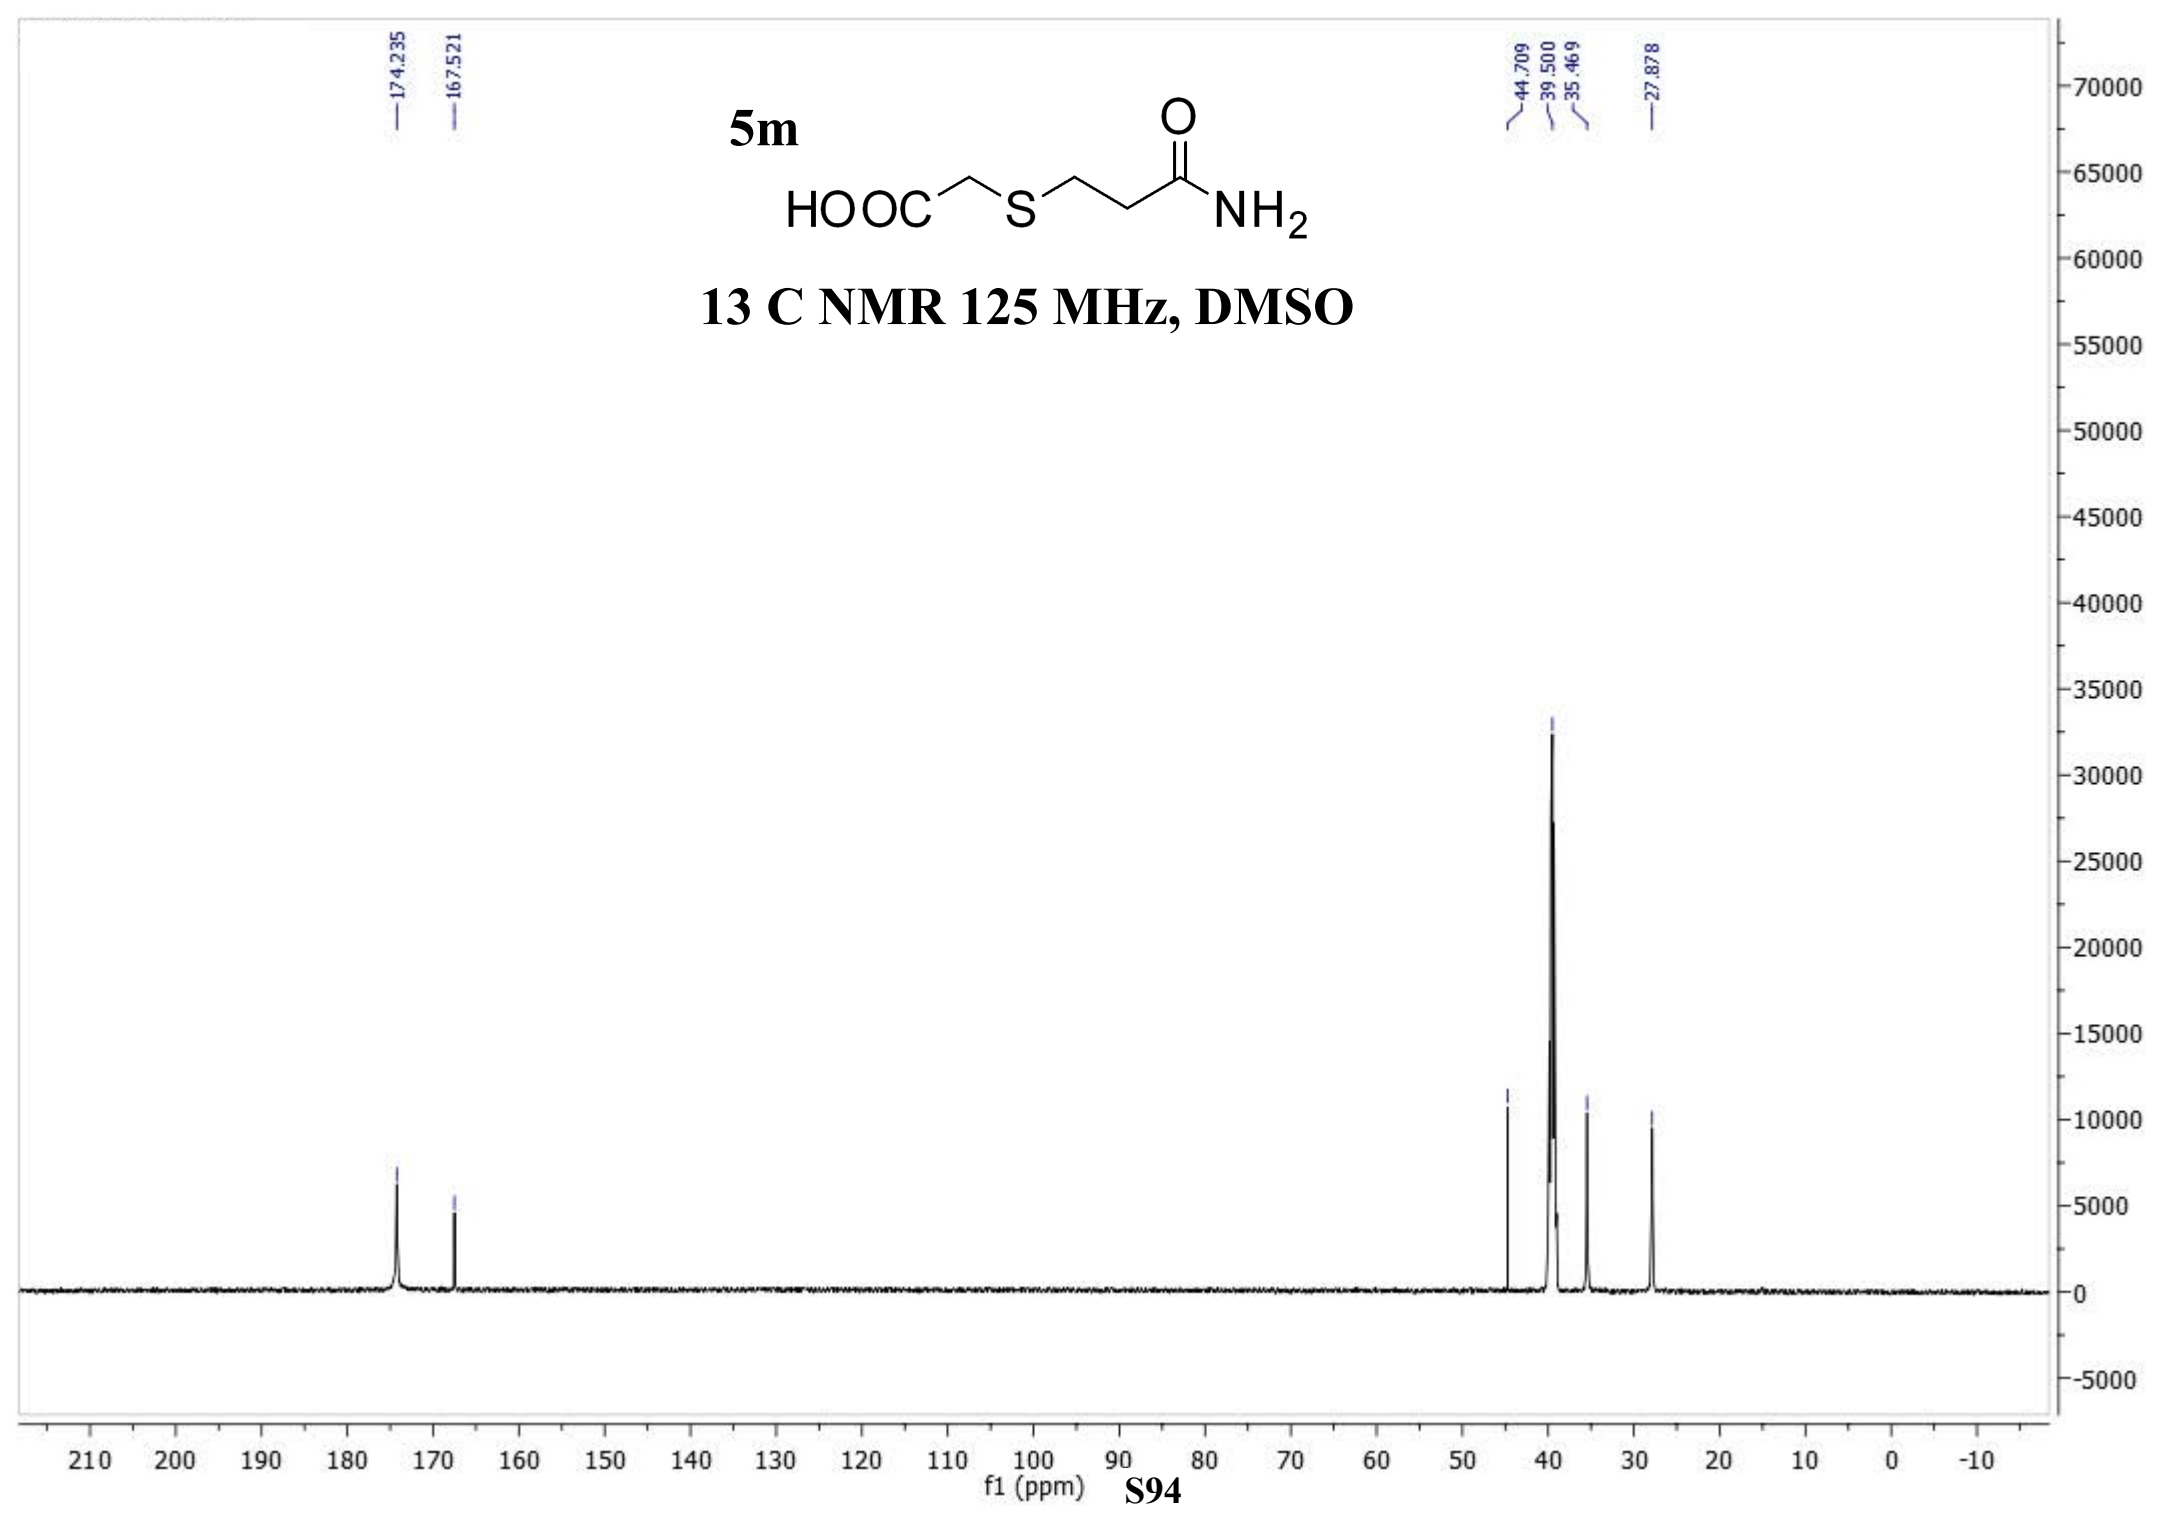

**5n**

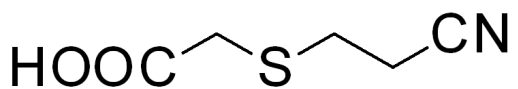

**<sup>13</sup>C NMR 125 MHz, DMSO**

171.528

119.793

42.844

39.500

27.190

17.669

220 210 200 190 180 170 160 150 140 130 120 110 100 90 80 70 60 50 40 30 20 10 0 -10

f1 (ppm) **S95**

2E+06  
2E+06  
2E+06  
2E+06  
2E+06  
2E+06  
1E+06  
1E+06  
1E+06  
1E+06  
1E+06  
1E+06  
9E+05  
8E+05  
7E+05  
6E+05  
5E+05  
4E+05  
3E+05  
2E+05  
1E+05  
0  
-1E+05  
-2E+05  
-3E+05

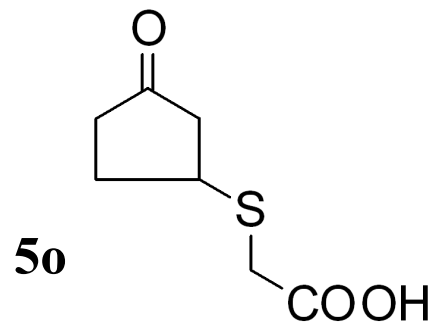

**<sup>13</sup>C NMR 125 MHz, DMSO**

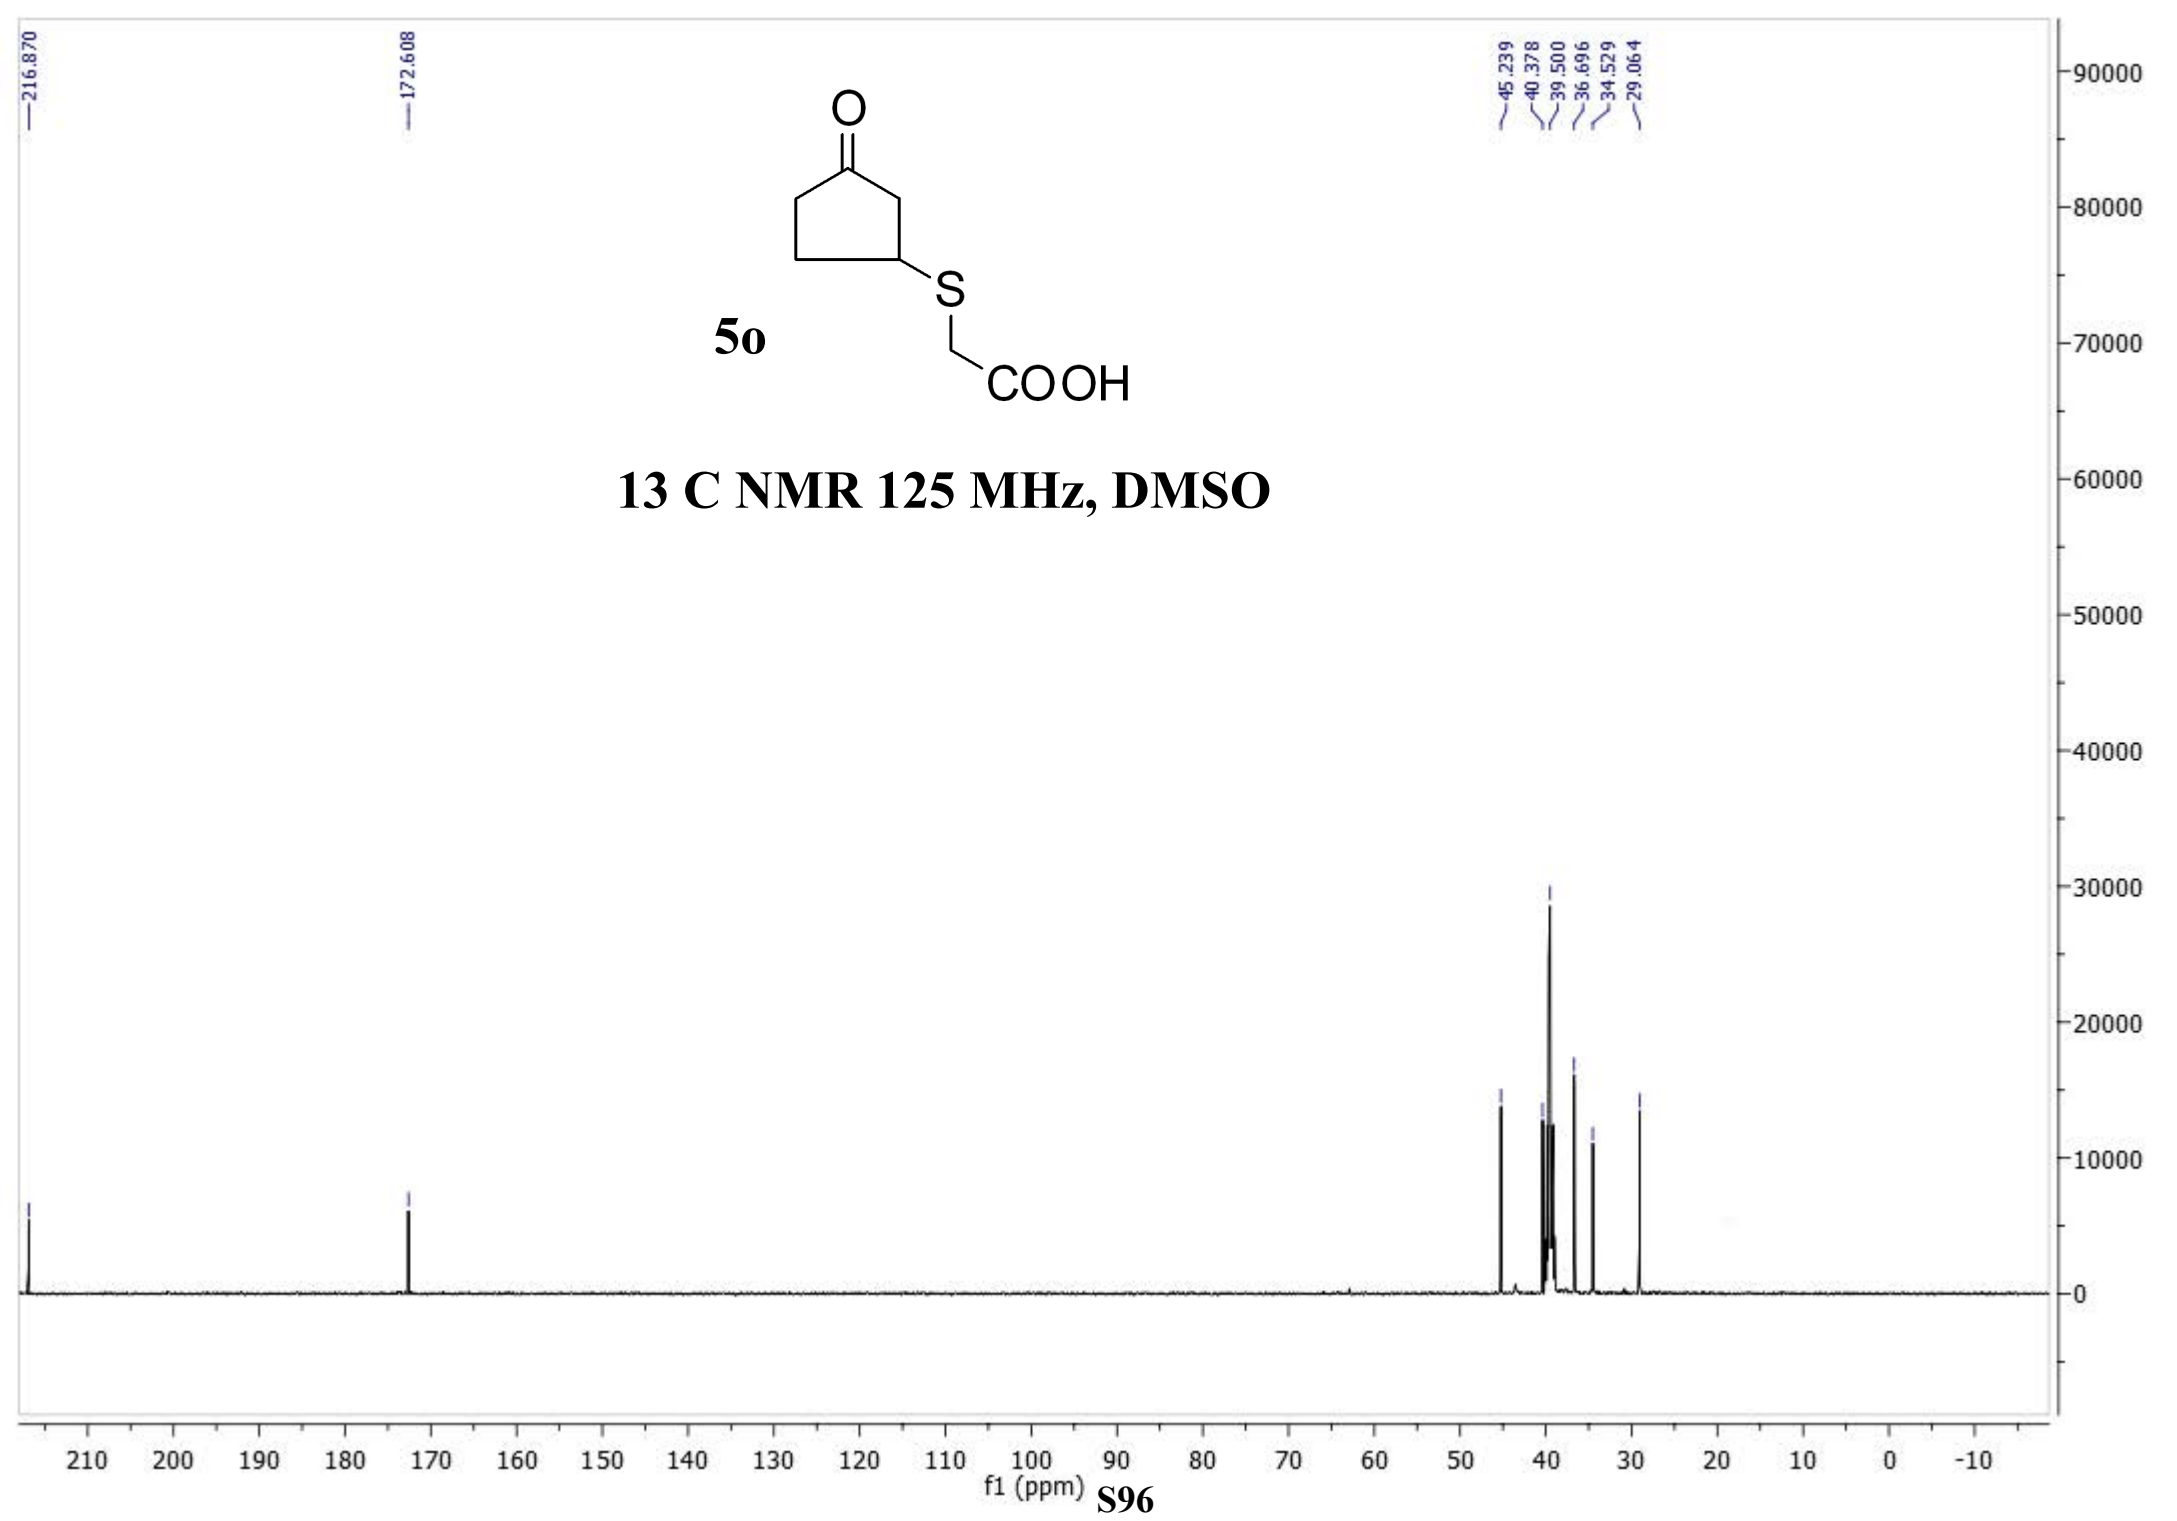



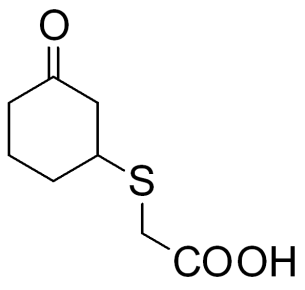

5p

**<sup>13</sup>C NMR 125 MHz, DMSO**

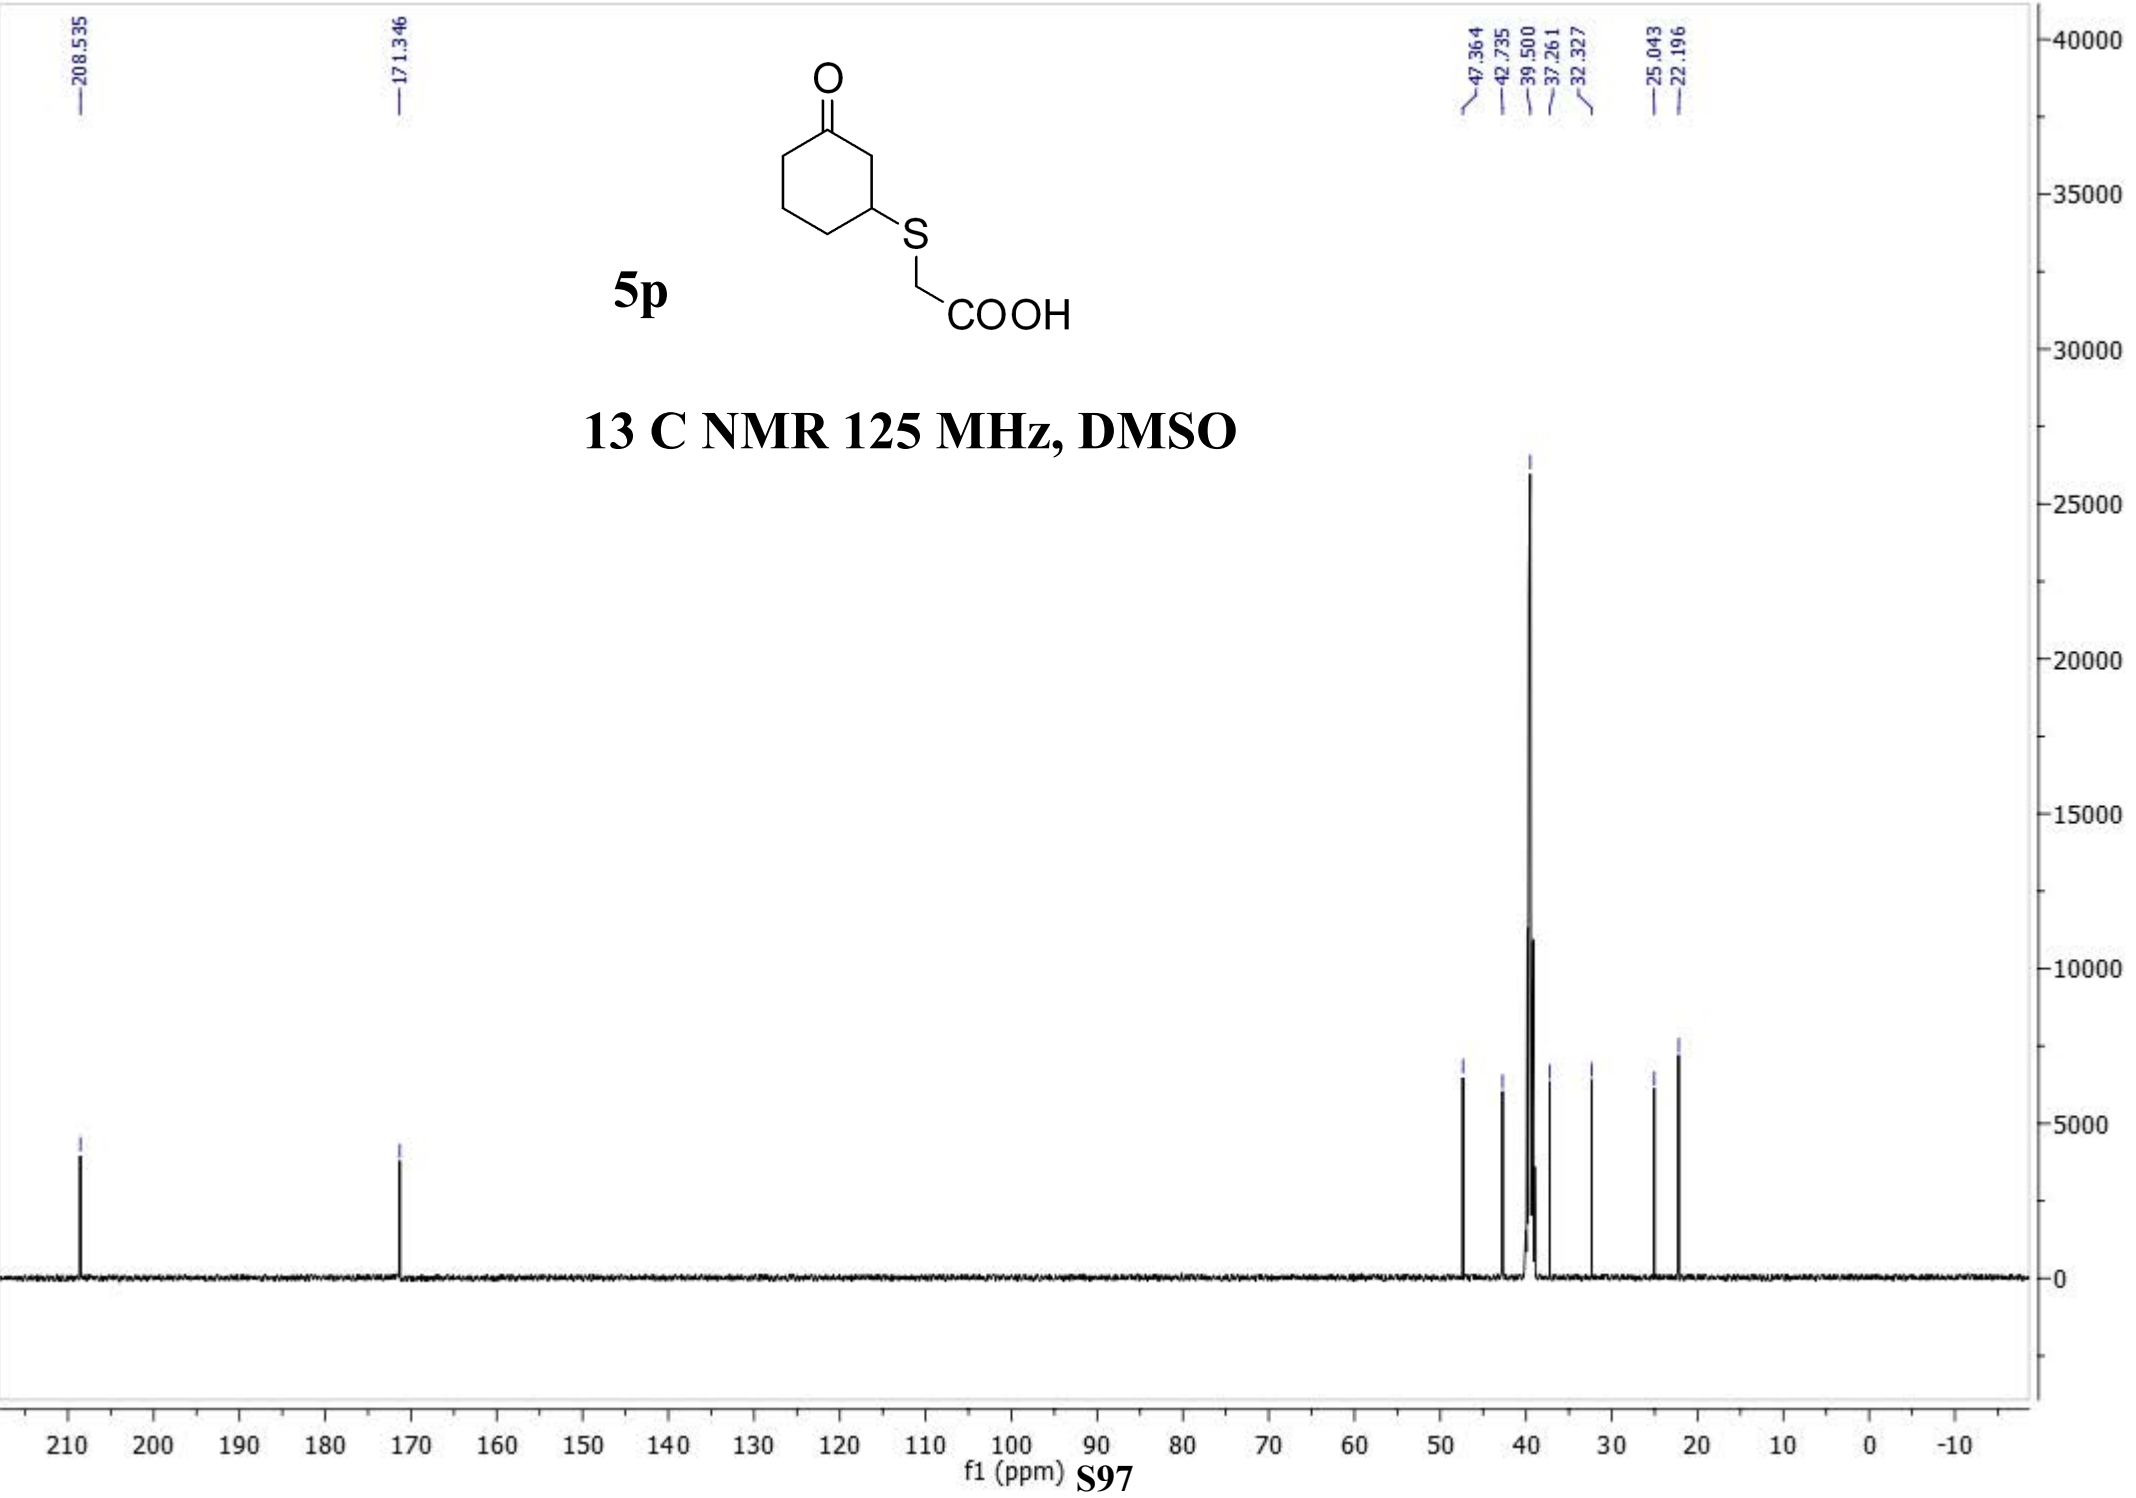

5q

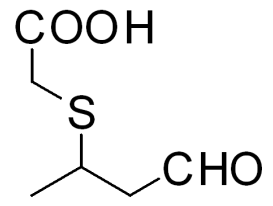

**<sup>13</sup>C NMR 125 MHz, DMSO**

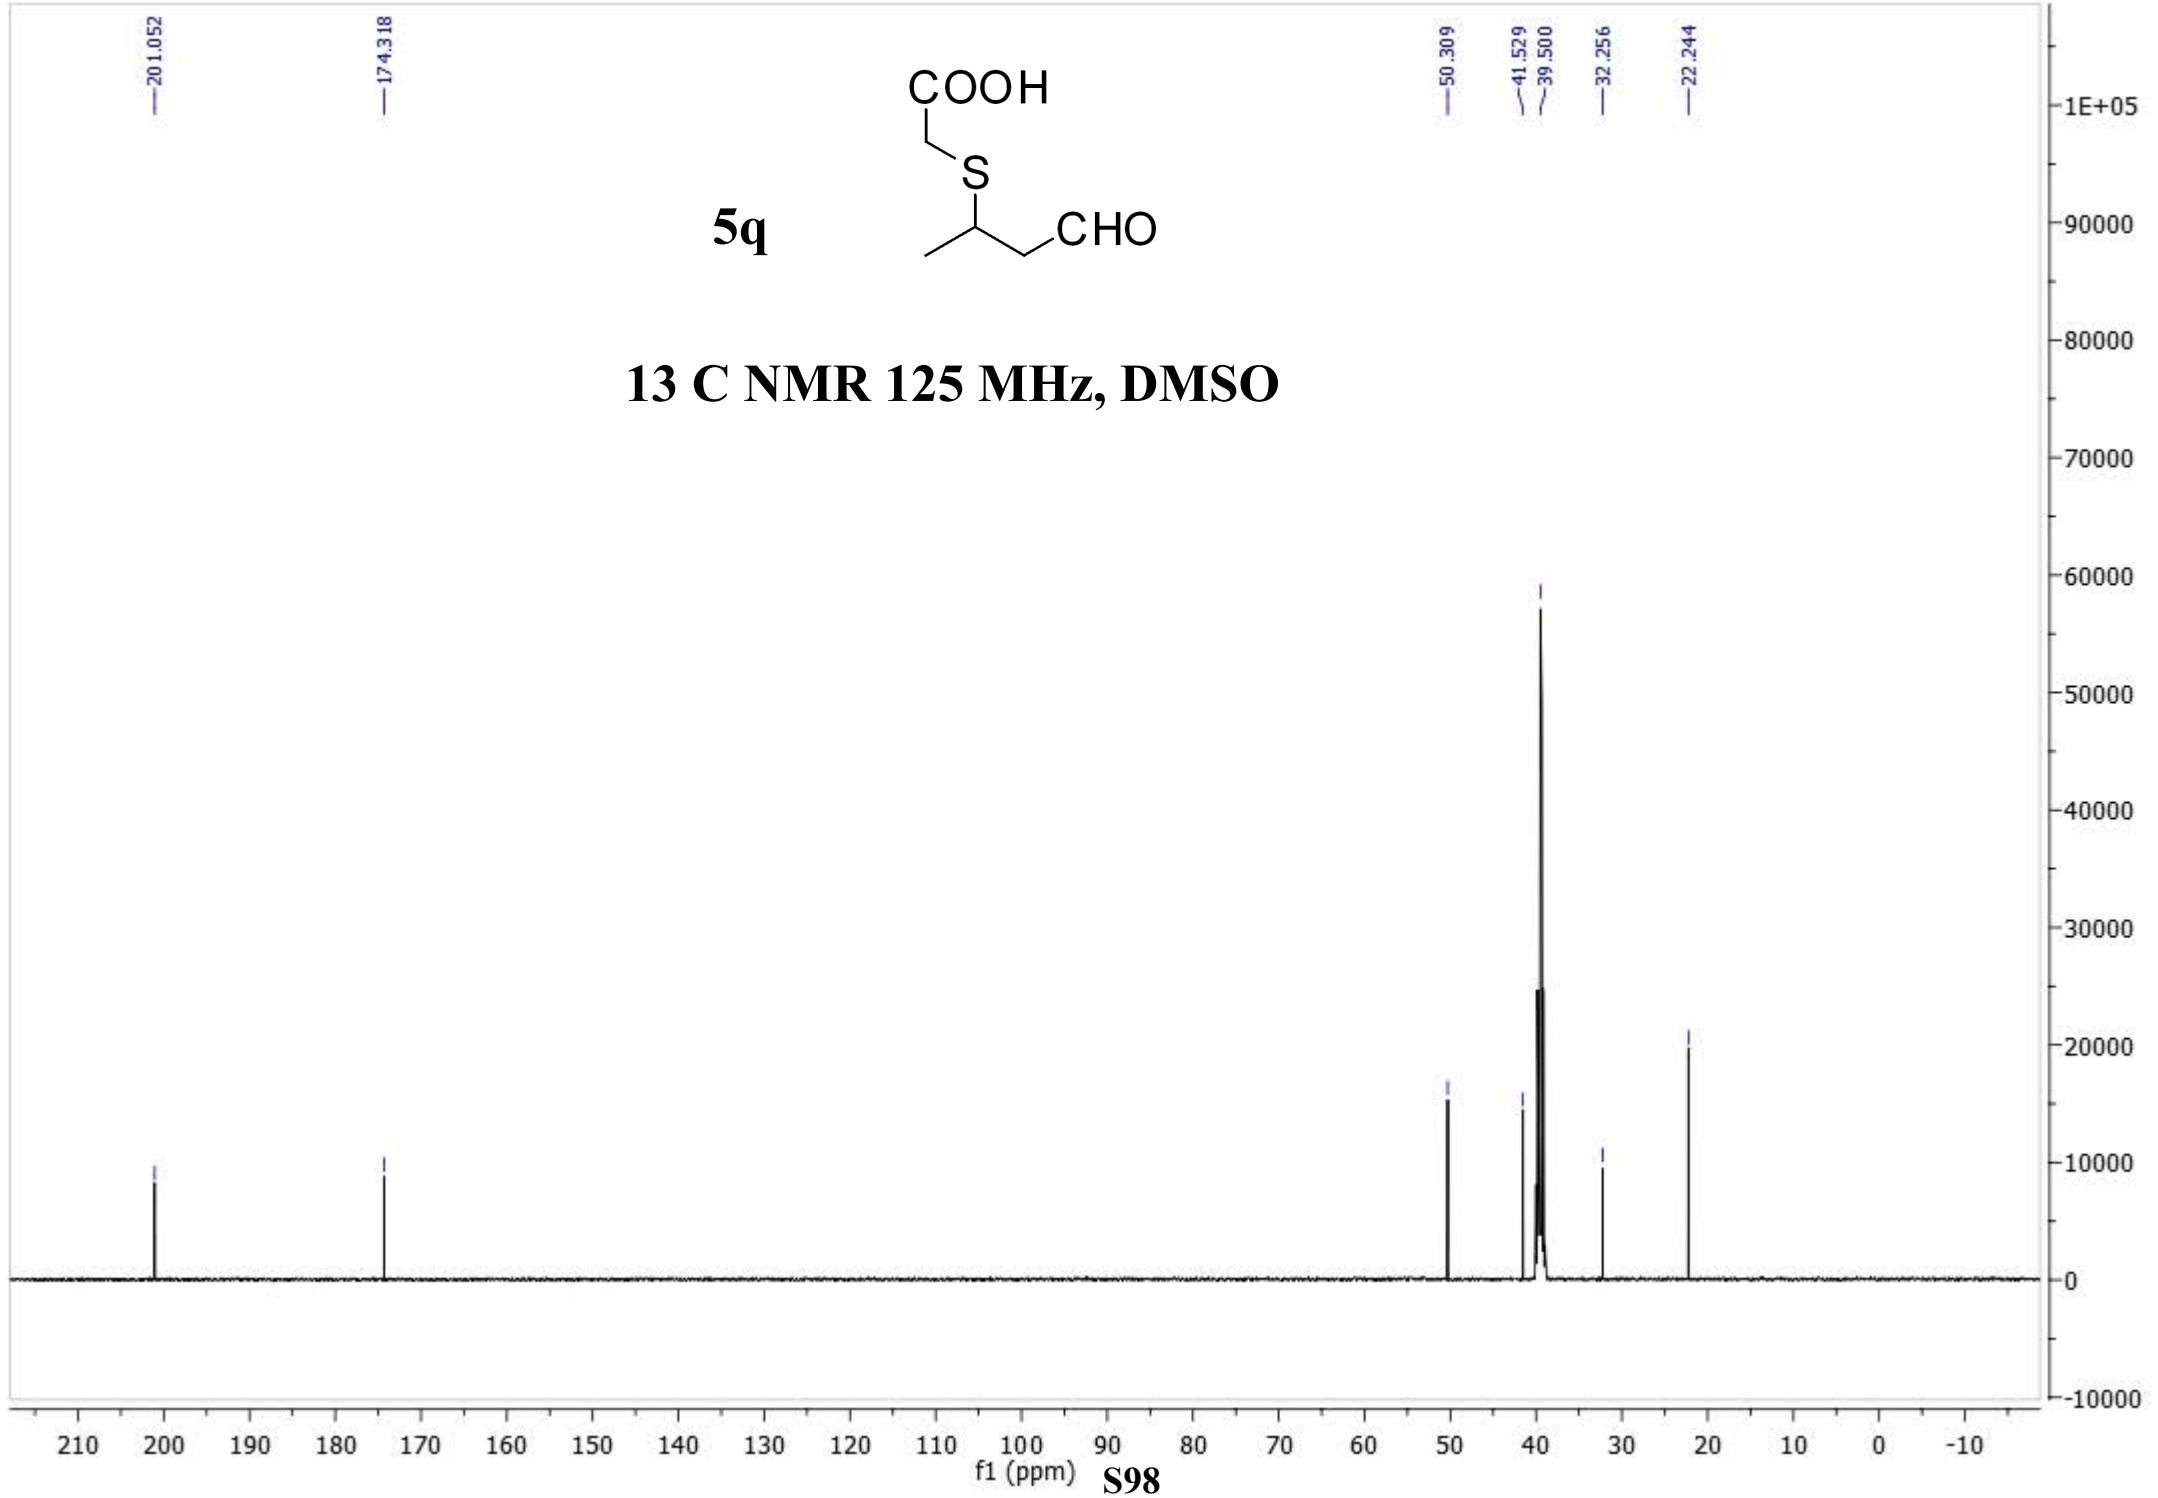

Supplement: d1nj05870c1.pdf [file d1nj05870c1.pdf]
